# Supplementary material for: Genome-wide DNA methylation analysis identifies kidney epigenetic dysregulation in a cystinosis mouse model
Source: Front Cell Dev Biol. 2025 Aug 21;13:1638123. doi: 10.3389/fcell.2025.1638123 (PMC12408635; doi:10.3389/fcell.2025.1638123)
Supplement: Supplementary file 4 [file Table1.xlsx]

## Sheet: DMP_0.01
logFC	AveExpr	t	P.Value	adj.P.Val	B	CpG_ID	AddressA_ID	AlleleA_ProbeSeq	AddressB_ID	AlleleB_ProbeSeq	Next_Base	Color_Channel	Col	Probe_Type	Strand	Strand_TB	Strand_CO	Infinium_Design_Type	Rep_Num	CHR	MAPINFO	Species	Genome_Build	SourceSeq	Forward_Sequence	Top_Sequence	Genome_Build_NCBI	N_Shelf	N_Shore	CpG_Island	CpG_Island_chrom	CpG_Island_chromStart	CpG_Island_chromEnd	CpG_Island_length	CpG_Island_cpgNum	CpG_Island_gcNum	CpG_Island_perCpg	CpG_Island_perGc	CpG_Island_obsExp	S_Shore	S_Shelf	MFG_Change_Flagged	Gene	Transcript	chrom	chromStart	chromEnd	chromLength	chromStrand
7.56342	0.553198	99.8245	1.35677e-22	3.88193e-17	22.4567	cg29951975	9797279	TCCRAAACAAATCTACTAAAACTAAACTAAACTAAAATTCCAAATCCTAC						cg	R	B	C	II	1	11	94392931	Mus musculus	mm10	CCraaaCAaATCTaCTaaaaCTaAaCTaAACTaAaATTCCAAaTCCTaCr	TCAGAGGCGGTTCCGGGGCAGATCTGCTGGGGCTGAGCTGAACTGAGATTCCAAGTCCTG[CG]GTGCACCAGAGCCACATGGACCGCCTGTGCGGCTCCGGAGAGCTGGGCTCCAAGTTCTGG	TCAGAGGCGGTTCCGGGGCAGATCTGCTGGGGCTGAGCTGAACTGAGATTCCAAGTCCTG[CG]GTGCACCAGAGCCACATGGACCGCCTGTGCGGCTCCGGAGAGCTGGGCTCCAAGTTCTGG	GRCm10															TRUE	Abcc3	NM_029600.3	chr11	94343294	94392976	49683	-
4.81919	2.92651	65.9838	6.66531e-20	9.53526e-15	21.9186	cg29956942	49786979	ATCAAAAAATCCCAACTAACCTTAAAACCATTTATCAAACAACCAATTCC						cg	R	B	C	II	1	11	94741331	Mus musculus	mm10	TCAAAAaaTCCCAACTaaCCTTAaaaCCATTTaTCAaaCAaCCAaTTCCr	GTTATCAGAGTATCAAAAGGTCCCAACTGGCCTTAGGGCCATTTGTCAGGCAGCCAGTTC[CG]CAGCCCAGCAGTGGAAGACAGCAATTTTGTAAAGGAAGCCAAATGACCTTTAGGAGGGCC	GTTATCAGAGTATCAAAAGGTCCCAACTGGCCTTAGGGCCATTTGTCAGGCAGCCAGTTC[CG]CAGCCCAGCAGTGGAAGACAGCAATTTTGTAAAGGAAGCCAAATGACCTTTAGGAGGGCC	GRCm10															TRUE	.	.	.	.	.	.	.
-4.92883	1.27458	-39.508	1.4016e-16	1.33674e-11	20.4266	cg29847768	10616221	AAAATAATCATACCCAAACTTAACCATCTACACAAAAAAAATAACTATCA	75786477	AAAATAATCGTACCCAAACTTAACCATCTACGCAAAAAAAATAACTATCG	T	Red	R	cg	R	B	C	I	1	11	83017640	Mus musculus	mm10	aAAATaaTCrTaCCCAaACTTaACCATCTACrCAaaAaAAaTaACTATCr	CTCCTTAGCAGTGAAATGGTCGTGCCCAGACTTGACCATCTACGCAGGAGAAGTGACTAT[CG]GAGAAGAAGATAGAAATAAAATGGACTCAAAGAAAAGAAAGCTGGAGAAGACAAGAATTA	CTCCTTAGCAGTGAAATGGTCGTGCCCAGACTTGACCATCTACGCAGGAGAAGTGACTAT[CG]GAGAAGAAGATAGAAATAAAATGGACTCAAAGAAAAGAAAGCTGGAGAAGACAAGAATTA	GRCm10															FALSE	Slfn8	NM_001167743.1	chr11	83002157	83020722	18566	-
-3.13404	-2.99382	-38.4415	2.10512e-16	1.50577e-11	20.3089	cg29903518	29652930	AAAATATCACCAAACATTCTACCAAATACAAAACRCAAATACTAACCCTC						cg	R	B	C	II	1	11	88405464	Mus musculus	mm10	aAaTaTCACCAaaCATTCTaCCAaATaCAAaaCrCAaATaCTaACCCTCr	AGAGGGTGAGGGGAGTGTCACCAGGCATTCTGCCAGATGCAAGGCGCAGATGCTGACCCT[CG]CCTCAGGGAGGTTCCAAGGGCCAGCTTGGCCCAGCACTGTGGTTCTGATTTGGAGAGGGC	AGAGGGTGAGGGGAGTGTCACCAGGCATTCTGCCAGATGCAAGGCGCAGATGCTGACCCT[CG]CCTCAGGGAGGTTCCAAGGGCCAGCTTGGCCCAGCACTGTGGTTCTGATTTGGAGAGGGC	GRCm10															TRUE	Msi2	NM_054043.3	chr11	88339381	88718229	378849	-
4.8263	1.86541	37.7907	2.71297e-16	1.55245e-11	20.2331	cg38375728	87791377	CACTCAACAATCACAACATCTAAAAATATATTAATCCTACTAAAATAAAC						cg	R	B	C	II	1	2	51438695	Mus musculus	mm10	ACTCAaCAaTCACAACATCTAaAAATaTATTaATCCTACTAAAATAaACr	ACATGGGGTCACACTCAGCAGTCACAACATCTAGAAATGTATTGATCCTACTAAAATAGA[CG]CTTACTGTTGTTTGCTTGGCTGCTGGTCCCGGAGGTAAGAGCAGAGGATGGGCACTCATT	ACATGGGGTCACACTCAGCAGTCACAACATCTAGAAATGTATTGATCCTACTAAAATAGA[CG]CTTACTGTTGTTTGCTTGGCTGCTGGTCCCGGAGGTAAGAGCAGAGGATGGGCACTCATT	GRCm10															FALSE	1700057H21Rik	NR_130155.1	chr2	51438100	51439400	1301	-
-5.46772	0.841061	-36.6096	4.34731e-16	2.07306e-11	20.0873	cg29860412	44787926	CACCTCTCCAAAAAAACAACTTTCATACCACCRAAAATATAAAATTAAAC						mu	R	B	C	II	1	11	84401267	Mus musculus	mm10	ACCTCTCCAaaAAAaCAaCTTTCATACCACCraaaaTaTaaaATTaaACr	NNNNNNNNNNNNNNNNNNNNNNNNNNNNNNNNNNNNNNNNNNNNNNNNNNNNNNNNNNNN[NN]NNNNNNNNNNNNNNNNNNNNNNNNNNNNNNNNNNNNNNNNNNNNNNNNNNNNNNNNNNNN	CCAGCCCACTCCACCTCTCCAGGAAAGCAGCTTTCATACCACCGGGGGTGTGGGATTGGA[CG]TGCTGTAGCAAAAGTGGAGGCCAGAGATAAATCCCATCCTTACCTACCAGGTAAGCAGGG	GRCm10															TRUE	Acaca	NM_133360.2	chr11	84195437	84401651	206215	+
-3.67682	-0.455004	-34.5646	1.01995e-15	4.10842e-11	19.8068	cg29777379	37643442	ATAACTCTCCTATAAAAAAACTTAATCCCTACAACAAACCTAAAACTACC						cg	F	T	C	II	1	11	76359597	Mus musculus	mm10	TAaCTCTCCTaTaaAaaaaCTTAATCCCTaCAaCAAACCTaaAaCTaCCr	GCCCAGGAAGCTTGGAAAGACGCAGAAGCAGGATTTGAGGTCATGGGAATTACAGGGAAA[CG]GCAGCTCCAGGTTTGCTGCAGGGATTAAGCCCCTCCACAGGAGAGCTACCCTAAAGTTCA	GCCCAGGAAGCTTGGAAAGACGCAGAAGCAGGATTTGAGGTCATGGGAATTACAGGGAAA[CG]GCAGCTCCAGGTTTGCTGCAGGGATTAAGCCCCTCCACAGGAGAGCTACCCTAAAGTTCA	GRCm10															FALSE	Nxn	NM_008750.5	chr11	76257225	76399141	141917	-
-5.82716	-3.37478	-34.2885	1.14874e-15	4.10842e-11	19.7659	cg38379753	88688318	AAAACCTAAAACTAAACRCTACTCRTCRCTAAAACCAAATTAATATTTTC						cg	R	B	C	II	1	2	51972961	Mus musculus	mm10	AaaCCTaaaACTaAaCrCTaCTCrTCrCTaAAaCCAaaTTAaTaTTTTCr	AAAGTGAAAGTAAGGCCTGGGACTGAGCGCTGCTCGTCGCTGAAGCCAGGTTAGTGTTTT[CG]AGGTAGAGTTCAGTTCTAAGGCACCGGCTTCCGGGAGCTGCGCAGCGAGCGGGTGAGTGC	AAAGTGAAAGTAAGGCCTGGGACTGAGCGCTGCTCGTCGCTGAAGCCAGGTTAGTGTTTT[CG]AGGTAGAGTTCAGTTCTAAGGCACCGGCTTCCGGGAGCTGCGCAGCGAGCGGGTGAGTGC	GRCm10			chr2:51972744-51972995	chr2	51972744	51972995	251	31	176	24.7	70.1	1			FALSE	Nmi	NM_001141949.1	chr2	51948498	51973208	24711	-
-4.04818	1.92901	-29.3736	1.13294e-14	3.60169e-10	18.8907	cg29910432	19681559	ACAAACACRTACTAACCTACTTAATTTCCATCACTATCATTCTTAATAAC						cg	F	T	C	II	1	11	88910965	Mus musculus	mm10	CAaACACrTaCTaACCTaCTTaATTTCCATCACTATCATTCTTAATAaCr	TAAAGTTTTGCCGCAGAAGATTCTGGTTTGTTGCGTCTTTCCTGGCCGGGCGCGTGAGAA[CG]CTATTAAGAATGATAGTGATGGAAATCAAGCAGGTCAGCACGTGTCTGTAATTCTGTTAC	TAAAGTTTTGCCGCAGAAGATTCTGGTTTGTTGCGTCTTTCCTGGCCGGGCGCGTGAGAA[CG]CTATTAAGAATGATAGTGATGGAAATCAAGCAGGTCAGCACGTGTCTGTAATTCTGTTAC	GRCm10															TRUE	Scpep1os	NR_045955.1	chr11	88905927	88936061	30135	+
-3.93094	-3.94018	-27.6507	2.76238e-14	7.40347e-10	18.5027	cg29905988	63642105	CCTCCTATATTCCAACAATAACCAATACATTTCTATAATTAAAACCCATC						cg	R	B	C	II	1	11	88599869	Mus musculus	mm10	CTCCTaTaTTCCAACAATaACCAATACATTTCTaTAATTAAAACCCATCr	CACCTGAACTTCCTCCTGTGTTCCAACAATGACCAATACATTTCTGTAATTAAAACCCAT[CG]TCTTTGGAACTGTGCCTTTAGACTACATCAGACAAGGGCTACACCCTTTACTGTGGTGAG	CACCTGAACTTCCTCCTGTGTTCCAACAATGACCAATACATTTCTGTAATTAAAACCCAT[CG]TCTTTGGAACTGTGCCTTTAGACTACATCAGACAAGGGCTACACCCTTTACTGTGGTGAG	GRCm10															TRUE	Msi2	NM_054043.3	chr11	88339381	88718229	378849	-
1.80763	0.788635	27.432	3.10509e-14	7.40347e-10	18.4498	cg29906305	67688175	AAACTATAACATAACTAAACCACAATTCAATAACAAAAACCTAATCTTAC						cg	F	T	C	II	1	11	88621797	Mus musculus	mm10	aaCTaTaACATaaCTaaaCCACAaTTCAaTAaCAaAaaCCTAaTCTTaCr	ATATGTATCCGAATCCTTTTTCTTCCCTGATGTTGAAGATAAAACCCAGGGTTCTGCACA[CG]CAAGACTAGGCCTCTGCTACTGAACTGTGGCCCAGCCATGTCACAGCCCCCTGTGTACTG	ATATGTATCCGAATCCTTTTTCTTCCCTGATGTTGAAGATAAAACCCAGGGTTCTGCACA[CG]CAAGACTAGGCCTCTGCTACTGAACTGTGGCCCAGCCATGTCACAGCCCCCTGTGTACTG	GRCm10															FALSE	Msi2	NM_054043.3	chr11	88339381	88718229	378849	-
2.43417	1.95692	26.9708	3.98546e-14	8.21843e-10	18.3352	cg29780391	89723566	TTCCTTCATATAACAAATAAATAAAACTCTCACCTTACTTAAATACCAAC						cg	F	T	C	II	1	11	76614030	Mus musculus	mm10	TCCTTCATATaACAaATAAATAAAACTCTCACCTTaCTTAAATACCAACr	GCTCTTCCATAGAACCTGTATTGGTTAAAATATGGGCTTGCTACATAGGACATAGTCTAA[CG]TTGGTATTTAAGCAAGGTGAGAGTTTTATTTATCTGTCATATGAAGGAACTCTGGAGATA	GCTCTTCCATAGAACCTGTATTGGTTAAAATATGGGCTTGCTACATAGGACATAGTCTAA[CG]TTGGTATTTAAGCAAGGTGAGAGTTTTATTTATCTGTCATATGAAGGAACTCTGGAGATA	GRCm10															FALSE	.	.	.	.	.	.	.
2.3781	1.02391	26.9543	4.02138e-14	8.21843e-10	18.331	cg29911125	68690888	CTTATAATCCRATACAAAAAAACCACCATCTTAACTAATACCAAAAAATC						cg	R	B	C	II	1	11	88965173	Mus musculus	mm10	TTATaATCCraTACAAaAAaACCACCATCTTaACTaATaCCAAaaAaTCr	TGGATGTATTTCTTATGATCCGGTACAAGAAGACCACCATCTTGACTGATGCCAAGGAGT[CG]AGCACAGTGTTGGCGCTCAAGCGCATCATTGAGGGCATCATGAAGAGGCCTCCTGAGGAG	TGGATGTATTTCTTATGATCCGGTACAAGAAGACCACCATCTTGACTGATGCCAAGGAGT[CG]AGCACAGTGTTGGCGCTCAAGCGCATCATTGAGGGCATCATGAAGAGGCCTCCTGAGGAG	GRCm10															FALSE	Gm15698	NR_003564.1	chr11	88964664	88966917	2254	-
-2.8679	0.544919	-26.5862	4.92292e-14	8.89243e-10	18.2365	cg29922477	8671291	TATTAACTATACTAATACAACATCTATATCCTTACTACTACCACTAAAAC						cg	R	B	C	II	1	11	90109654	Mus musculus	mm10	aTTaACTaTaCTaATACAaCATCTaTATCCTTaCTaCTaCCACTAaAACr	CCAGGATGCCTTGTTGACTGTGCTGATACAGCATCTGTATCCTTGCTGCTGCCACTAGAA[CG]AACGAAGAGATGCTCCCAACCACCTTCACATAGTGCCAGGATGGAGGCAGCTTCCTCTGA	CCAGGATGCCTTGTTGACTGTGCTGATACAGCATCTGTATCCTTGCTGCTGCCACTAGAA[CG]AACGAAGAGATGCTCCCAACCACCTTCACATAGTGCCAGGATGGAGGCAGCTTCCTCTGA	GRCm10															FALSE	.	.	.	.	.	.	.
2.22436	1.62036	26.568	4.97277e-14	8.89243e-10	18.2318	cg29899599	92610113	AAAAATAAAAAACTATCTTCAACTTCCTAAAAACAAACTTTTATATTCCC						cg	F	T	C	II	1	11	88116458	Mus musculus	mm10	aaaATAAAaaACTATCTTCAaCTTCCTAAaaACAaACTTTTATATTCCCr	AAAACAGTGGCCGGGCAGGCAACTCAGCCAGAGGCACTTCCGTAGATCTATCACCAGCCA[CG]GGAATATAAAAGTCTGTCCTTAGGAAGCTGAAGATAGTCCTTTATCCCTCTTCCTTTCCA	AAAACAGTGGCCGGGCAGGCAACTCAGCCAGAGGCACTTCCGTAGATCTATCACCAGCCA[CG]GGAATATAAAAGTCTGTCCTTAGGAAGCTGAAGATAGTCCTTTATCCCTCTTCCTTTCCA	GRCm10															FALSE	Cuedc1	NM_198013.3	chr11	88099145	88194140	94996	+
-4.45646	0.183114	-26.1296	6.35106e-14	1.06891e-09	18.1155	cg29853340	41648226	CCAAAACCAACATAAAAACAACCACCATCTTAATTCTAATAACTTTCATC						cg	R	B	C	II	1	11	83677556	Mus musculus	mm10	CAaAaCCAACATaAAaACAaCCACCATCTTAaTTCTaaTaaCTTTCATCr	GCTCAGTCCAGCCAGAGCCAACATGAAGACAGCCACCATCTTAGTTCTGGTGGCTTTCAT[CG]CCATGGGAATGACCACTGCCTGTGCTCTGCATTCACCCAAAAGTAAATGTGTTAAGGGGA	GCTCAGTCCAGCCAGAGCCAACATGAAGACAGCCACCATCTTAGTTCTGGTGGCTTTCAT[CG]CCATGGGAATGACCACTGCCTGTGCTCTGCATTCACCCAAAAGTAAATGTGTTAAGGGGA	GRCm10															FALSE	.	.	.	.	.	.	.
3.2355	1.76517	25.9774	6.9204e-14	1.10002e-09	18.0742	cg29911155	99706916	AACAATAACTAATTACATTTTCAATTACTTCTCCTATTAAAAAATTAACA	80767115	AACAATAACTAATTACATTTTCAATTACTTCTCCTATTAAAAAATTAACG	T	Red	R	cg	R	B	C	I	1	11	88969319	Mus musculus	mm10	aaCAATAACTAATTACATTTTCAaTTaCTTCTCCTaTTAAAaAATTAaCr	TGTGATCAATCAGGCAATAACTAATTACATTTTCAGTTGCTTCTCCTGTTAAAGAATTAG[CG]GTATGTAAAAAAGGAACAGTTTCAAGCAATTGCAAACCATGGATATAAGTAAACATATTA	TGTGATCAATCAGGCAATAACTAATTACATTTTCAGTTGCTTCTCCTGTTAAAGAATTAG[CG]GTATGTAAAAAAGGAACAGTTTCAAGCAATTGCAAACCATGGATATAAGTAAACATATTA	GRCm10															FALSE	.	.	.	.	.	.	.
2.76491	1.1652	25.6719	8.23424e-14	1.23997e-09	17.9897	cg29913098	64753119	ACAAACTAAATAAATAACCTTAAACAAATAACTTAACTCCTACATCTCTC						cg	R	B	C	II	1	11	89106333	Mus musculus	mm10	CAaACTAaATaaATaaCCTTaaaCAAaTaaCTTAACTCCTaCATCTCTCr	TCTCACCTCTGACAGACTAGATGGATGGCCTTGGGCAAGTGGCTTAACTCCTGCATCTCT[CG]GTTCTCGGAGGATCAAAATCAAATAACGGTAGTGCCCACCATTGTAAAGTTTGGTGATTA	TCTCACCTCTGACAGACTAGATGGATGGCCTTGGGCAAGTGGCTTAACTCCTGCATCTCT[CG]GTTCTCGGAGGATCAAAATCAAATAACGGTAGTGCCCACCATTGTAAAGTTTGGTGATTA	GRCm10															FALSE	.	.	.	.	.	.	.
2.57988	-1.98717	24.2274	1.92551e-13	2.7546e-09	17.5618	cg29925331	2668325	ATAAATACCAATAAAATATCTACACCTATATTCTATTATACTTTTACTAC						cg	R	B	C	II	1	11	90371299	Mus musculus	mm10	TaaaTACCAATAaaATaTCTACACCTaTaTTCTATTaTaCTTTTACTACr	TAAGCCTGTGAATGGGTACCAATAGGATGTCTACACCTGTGTTCTATTGTGCTTTTACTA[CG]TGCTCCGTGGGCTCCTGGTCGCTGTGTCACAAGGGGTGGATTCGGAAGTGTGCTGGGCAG	TAAGCCTGTGAATGGGTACCAATAGGATGTCTACACCTGTGTTCTATTGTGCTTTTACTA[CG]TGCTCCGTGGGCTCCTGGTCGCTGTGTCACAAGGGGTGGATTCGGAAGTGTGCTGGGCAG	GRCm10															FALSE	Hlf	NM_172563.3	chr11	90336534	90390917	54384	-
6.6351	-2.30717	23.9918	2.22175e-13	3.02704e-09	17.4873	cg29911589	89669121	CCCAAAAACTACCAAATACAATTTCAAAAACACTCTACAAATAAATTATC						cg	R	B	C	II	1	11	88999183	Mus musculus	mm10	CCAAaaaCTACCAaaTaCAaTTTCAaAaaCACTCTaCAaATaAATTaTCr	GCGACGCACGACCCAAGGGCTACCAGGTGCAGTTTCAGAGGCACTCTGCAGATGAATTGT[CG]CAGGGGCTGGAATATTCCCACCCTCCTGGTCGGGGCCTACGTCCTAGCACAGTGCAGCAG	GCGACGCACGACCCAAGGGCTACCAGGTGCAGTTTCAGAGGCACTCTGCAGATGAATTGT[CG]CAGGGGCTGGAATATTCCCACCCTCCTGGTCGGGGCCTACGTCCTAGCACAGTGCAGCAG	GRCm10		chr11:88999234-89000002													FALSE	Trim25	NM_009546.2	chr11	88997902	88999202	1301	+
-4.09851	1.50377	-23.496	3.01603e-13	3.83656e-09	17.3255	cg29897262	13626986	TTAACATTTAAAAATTCACATACCTAACAAAACAACCACAAAACATATCA	94641880	TTAACATTTAAAAATTCACATACCTAACAAAACAACCGCAAAACATATCG	T	Red	R	cg	R	B	C	I	1	11	87944227	Mus musculus	mm10	TTaaCATTTaAAAATTCACATACCTaaCAaaaCAaCCrCAaAaCATaTCr	TTGACAGAAACCTTGGCATTTGAAAATTCACATACCTGGCAGGGCAGCCGCAGAGCATGT[CG]ACCCCTGTCTATAAGAGGATCATACAGGATTTGGGGGATTTCATGTATTCTATGTATGTG	TTGACAGAAACCTTGGCATTTGAAAATTCACATACCTGGCAGGGCAGCCGCAGAGCATGT[CG]ACCCCTGTCTATAAGAGGATCATACAGGATTTGGGGGATTTCATGTATTCTATGTATGTG	GRCm10															TRUE	.	.	.	.	.	.	.
1.55251	-0.476283	21.9016	8.4145e-13	1.00314e-08	16.7585	cg29906390	70781312	AAACCCTAATTAAAAACAACTTCCTAACAATATCCCAAAAACCACTTACC						cg	R	B	C	II	1	11	88626759	Mus musculus	mm10	aaCCCTaaTTaaaAaCAaCTTCCTaaCAaTaTCCCAaaaaCCACTTaCCr	CCTGTGCCACCAGGCCCTGGTTGGGAGCAGCTTCCTGGCAGTGTCCCAGGGGCCACTTGC[CG]CCTGGGCTGGGCTCCCTGGGAAGCCCCAGCTGATGGTGGAATGGCGGCTGCCAGGAGAAG	CCTGTGCCACCAGGCCCTGGTTGGGAGCAGCTTCCTGGCAGTGTCCCAGGGGCCACTTGC[CG]CCTGGGCTGGGCTCCCTGGGAAGCCCCAGCTGATGGTGGAATGGCGGCTGCCAGGAGAAG	GRCm10															FALSE	Msi2	NM_054043.3	chr11	88339381	88718229	378849	-
-2.76381	3.85573	-21.5397	1.07256e-12	1.1803e-08	16.619	ch165124390	62712281	AAAAAAAAAAAATTCTAATTATCCTACCAAAAAACTTAAAACTTCTATAA						ch		B	C	II	1	6	101837884	Mus musculus	mm10	AAaAAAaAaAATTCTaATTaTCCTaCCAAaAaaCTTaAAaCTTCTaTaaY	NNNNNNNNNNNNNNNNNNNNNNNNNNNNNNNNNNNNNNNNNNNNNNNNNNNNNNNNNNNN[NN]NNNNNNNNNNNNNNNNNNNNNNNNNNNNNNNNNNNNNNNNNNNNNNNNNNNNNNNNNNNN	AATAATGAGCAAAGAAAGAGAATTCTGATTGTCCTGCCAAGAGGCTTGAAGCTTCTGTGG[CT]TCAGGCCAGGAGATGGAAGGGAAATTGAATGACAAAATAAATAAGAAACATCTTCACCTC	GRCm10															TRUE	.	.	.	.	.	.	.
1.37388	-1.7622	21.4612	1.13117e-12	1.19869e-08	16.5881	cg29921825	91741452	AATTCAAAATTTTAACATACTCCAACTCCRCTCRAAAACATAATAATTCC						cg	R	B	C	II	1	11	90033335	Mus musculus	mm10	ATTCAaAaTTTTaaCATaCTCCAACTCCrCTCraaaACATaATAATTCCr	CCTCACCAGCAGATTCAGAGTTTTGGCATGCTCCAACTCCGCTCGGGGACATGATAATTC[CG]GATCATCACCTCAGAGTCCCCAGAGACTGGAGCCAGCCTCGGCTTTTCTTTCTCTCCCAG	CCTCACCAGCAGATTCAGAGTTTTGGCATGCTCCAACTCCGCTCGGGGACATGATAATTC[CG]GATCATCACCTCAGAGTCCCCAGAGACTGGAGCCAGCCTCGGCTTTTCTTTCTCTCCCAG	GRCm10															FALSE	Tmem100	NM_026433.2	chr11	90030347	90036505	6159	+
1.98608	1.82292	21.0126	1.53804e-12	1.57164e-08	16.4079	cg29905181	49689557	CCCRCCCTAAATCTCTACTTTTAAAACTAATATCTAAAATCTATTAACTC						cg	F	T	C	II	1	11	88535584	Mus musculus	mm10	CCrCCCTaaATCTCTaCTTTTaAaACTaaTaTCTaaaATCTaTTaaCTCr	CAGTGAAGGACTGCTTCTGAAACCTAAGCGAAGATGCAGAGGAAGCATTTTATAGGGACA[CG]AGCCAACAGATCCCAGACACCAGTCTCAAAAGCAGAGATCCAGGGCGGGGCTGTAGCTCA	CAGTGAAGGACTGCTTCTGAAACCTAAGCGAAGATGCAGAGGAAGCATTTTATAGGGACA[CG]AGCCAACAGATCCCAGACACCAGTCTCAAAAGCAGAGATCCAGGGCGGGGCTGTAGCTCA	GRCm10															FALSE	Msi2	NM_054043.3	chr11	88339381	88718229	378849	-
-1.51476	-0.524033	-20.7153	1.89185e-12	1.86652e-08	16.2847	cg29905053	49736160	ACTTAAAAAACCACTACTCTAACACAATAAAAATTTACTTCTTACTCACA	61782170	ACTTAAAAAACCACTACTCTAACACAATAAAAATTTACTTCTTACTCACG	A	Red	R	cg	F	T	C	I	1	11	88526175	Mus musculus	mm10	aCTTaAaAAACCACTaCTCTAACACAATAaAAaTTTACTTCTTaCTCACr	AGGTCCCTAAATCACTGCATGGGAGAAAGGCCAACCAGGAGCTTCCACTTGGAATGGTCA[CG]TGAGCAAGAAGTAAACTTCTATTGTGTTAGAGCAGTGGTTTCTCAAGCTGCCTCATGCTG	AGGTCCCTAAATCACTGCATGGGAGAAAGGCCAACCAGGAGCTTCCACTTGGAATGGTCA[CG]TGAGCAAGAAGTAAACTTCTATTGTGTTAGAGCAGTGGTTTCTCAAGCTGCCTCATGCTG	GRCm10															FALSE	Msi2	NM_054043.3	chr11	88339381	88718229	378849	-
1.87493	-1.41449	18.6127	8.90342e-12	8.21745e-08	15.3158	cg29755319	99617455	TTTTAATTTTCTATAAATCRATATTTTTTCTACCTCTATCTATACACCAC						cg	F	T	C	II	1	11	74546390	Mus musculus	mm10	TTTAATTTTCTaTaaaTCraTaTTTTTTCTaCCTCTaTCTaTACACCACr	CACAACTCCAGATCCAGGGAAGCTGATGCCCTCTTCTGGTCTCCTTAGGCACTACATGAA[CG]TGGTGTACAGACAGAGGCAGAAAAAACACCGACCCACAGAAAATTAAAAAATAAGTCTTA	CACAACTCCAGATCCAGGGAAGCTGATGCCCTCTTCTGGTCTCCTTAGGCACTACATGAA[CG]TGGTGTACAGACAGAGGCAGAAAAAACACCGACCCACAGAAAATTAAAAAATAAGTCTTA	GRCm10															FALSE	Rap1gap2	NM_001015046.2	chr11	74383482	74590158	206677	-
3.31369	-1.98711	17.9925	1.45023e-11	1.29667e-07	14.9939	cg29766404	86700133	TTTCCACCCTACTATACCTAAAACTTCCTAACCTATATTATCTTTCCAAC						cg	F	T	C	II	1	11	75468052	Mus musculus	mm10	TTCCACCCTaCTaTaCCTaaaaCTTCCTaaCCTaTATTATCTTTCCAaCr	GCGCCAATCAATGAGCAGCCGAGAGATAGGGGCGTGGACAAGCCAGGAAAAGTTACAGCA[CG]CTGGAAAGATAATACAGGCCAGGAAGCCCCAGGCACAGCAGGGTGGAAAAGCTAGATCCC	GCGCCAATCAATGAGCAGCCGAGAGATAGGGGCGTGGACAAGCCAGGAAAAGTTACAGCA[CG]CTGGAAAGATAATACAGGCCAGGAAGCCCCAGGCACAGCAGGGTGGAAAAGCTAGATCCC	GRCm10															FALSE	Tlcd2	NM_001291156.1	chr11	75468049	75470899	2851	+
1.44842	2.01269	17.3614	2.42117e-11	2.0992e-07	14.6473	cg29899947	74760933	TTACAAAACTACCTAATAACCTAACATATATACTATTCATCATAATAACC						cg	F	T	C	II	1	11	88145113	Mus musculus	mm10	TaCAaaaCTaCCTaATaaCCTaACATATaTaCTaTTCATCATaATAaCCr	CGCAGCATTTATTGTCTAAGAACTCTGGTCCTCACACTGCACTGACATTCCTGTGGATAA[CG]GCTATCATGATGAACAGCACATATGTCAGGCCATCAGGCAGCCCTGCAACCCAGAGGCAG	CGCAGCATTTATTGTCTAAGAACTCTGGTCCTCACACTGCACTGACATTCCTGTGGATAA[CG]GCTATCATGATGAACAGCACATATGTCAGGCCATCAGGCAGCCCTGCAACCCAGAGGCAG	GRCm10															FALSE	Cuedc1	NM_198013.3	chr11	88099145	88194140	94996	+
1.74873	-0.513988	16.9153	3.51451e-11	2.95752e-07	14.39	cg29895637	93630943	CATTAACATCTAAATAAACRATATATCCRAACCCCTAAAACCCAATAACC						cg	F	T	C	II	1	11	87802685	Mus musculus	mm10	ATTaACATCTaaATaaaCraTaTaTCCrAaCCCCTaaAaCCCAATaaCCr	TCACCATCACGTAGCTTCCTAAACTGAGTGCCAATGAGGCAGGCAAGGAGCTGGCCTACA[CG]GCCATTGGGCTCCAGGGGCTCGGACACACCGCCCATCCAGATGTCAATGTTGTTGGGCGT	TCACCATCACGTAGCTTCCTAAACTGAGTGCCAATGAGGCAGGCAAGGAGCTGGCCTACA[CG]GCCATTGGGCTCCAGGGGCTCGGACACACCGCCCATCCAGATGTCAATGTTGTTGGGCGT	GRCm10															FALSE	Mpo	NM_010824.2	chr11	87793783	87804412	10630	+
1.9281	1.38685	16.6276	4.4905e-11	3.67087e-07	14.2184	cg29896637	65798219	TCATACAAATTATCAAAAAACAATAAAACTCAACCATTATCCTAAAATCA	75698581	TCATACAAATTATCAAAAAACAATAAAACTCGACCGTTATCCTAAAATCG	G	Grn	G	cg	R	B	C	I	1	11	87871402	Mus musculus	mm10	TCATaCAaaTTaTCAAAAaaCAaTAaaaCTCrACCrTTaTCCTaaAATCr	AGACAGGGGTCCTCATGCAGGTTGTCAAAAGGCAGTAGGGCTCGACCGTTGTCCTGGAAT[CG]CTGGTTCGTGGCCAGCAGCCCCAGGAAGTTGGTCCTATTACGGAGCCGCAGGGCGAGGGT	AGACAGGGGTCCTCATGCAGGTTGTCAAAAGGCAGTAGGGCTCGACCGTTGTCCTGGAAT[CG]CTGGTTCGTGGCCAGCAGCCCCAGGAAGTTGGTCCTATTACGGAGCCGCAGGGCGAGGGT	GRCm10			chr11:87871383-87871613	chr11	87871383	87871613	230	19	140	16.5	60.9	0.92			FALSE	Epx	NM_007946.2	chr11	87863997	87875536	11540	-
1.13643	0.320684	16.4139	5.40046e-11	4.2921e-07	14.0879	cg29903755	77764523	AAAACTCCAAACTTCAAAAAAACCCACTACTTAAAAACAACTTTACAAAC						cg	R	B	C	II	1	11	88425640	Mus musculus	mm10	AaaCTCCAAACTTCAaAAAAaCCCACTACTTaaAAaCAACTTTaCAAaCr	TGACCACAGATAAGGCTCCAAACTTCAGAAAAGCCCACTACTTGGAAGCAACTTTGCAAG[CG]CTGCCACAAACTCTCTGTACTTTATAACAAGCGGGGGTGGGGGTGGGGCTTTAGAACAGC	TGACCACAGATAAGGCTCCAAACTTCAGAAAAGCCCACTACTTGGAAGCAACTTTGCAAG[CG]CTGCCACAAACTCTCTGTACTTTATAACAAGCGGGGGTGGGGGTGGGGCTTTAGAACAGC	GRCm10															FALSE	Msi2	NM_054043.3	chr11	88339381	88718229	378849	-
-3.10341	1.36784	-16.2783	6.07796e-11	4.7e-07	14.0038	cg29853363	82711253	AAAAAATCAATTCTAAAATAAACACCACAAACAATAAAATAATAAACACC						cg	F	T	C	II	1	11	83682147	Mus musculus	mm10	AaAAaTCAaTTCTaAAATAaACACCACAaaCAaTAaAATaaTAaaCACCr	AGAAAAAAAGAGGAATTCTCTCTGTATATTTATATATGTAAATATATAGAGCTTTCAAGA[CG]GTGCCTACCATTCTACTGCCTGTGGTGTCTATTTCAGAACTGACTTCTCTCTAATTTTCC	AGAAAAAAAGAGGAATTCTCTCTGTATATTTATATATGTAAATATATAGAGCTTTCAAGA[CG]GTGCCTACCATTCTACTGCCTGTGGTGTCTATTTCAGAACTGACTTCTCTCTAATTTTCC	GRCm10															FALSE	.	.	.	.	.	.	.
1.14991	1.99725	16.1703	6.6823e-11	5.03135e-07	13.936	cg32320585	41642104	TATCTCAACTCTACAAAATACATAAAAACATACTCTTTCTAAATCCTCAC						cg	F	T	C	II	1	14	29988735	Mus musculus	mm10	aTCTCAACTCTaCAAaaTACATAAaaACATACTCTTTCTaAaTCCTCACr	CCCAAGATTTCTGACACTTGCACTTTTCTGGTTTTGCCATTACTGGTAGACATCAGTGTA[CG]TGAGGACTCAGAAAGAGTATGTCCTTATGTACCTTGCAGAGTTGAGACACTTGGCAGTTT	CCCAAGATTTCTGACACTTGCACTTTTCTGGTTTTGCCATTACTGGTAGACATCAGTGTA[CG]TGAGGACTCAGAAAGAGTATGTCCTTATGTACCTTGCAGAGTTGAGACACTTGGCAGTTT	GRCm10															FALSE	Actr8	NM_027493.3	chr14	29978336	29993221	14886	+
1.3155	2.06591	15.8707	8.71878e-11	6.39636e-07	13.7443	cg29916560	60701228	CAAATATAAAATCTTCATAAAAATCTCCCCAAATCATCCTACAAAAAACA	73655374	CAAATATAAAATCTTCATAAAAATCTCCCCAAATCATCCTACAAAAAACG	T	Red	R	cg	R	B	C	I	1	11	89418707	Mus musculus	mm10	CAAATaTAAaaTCTTCATAaAaaTCTCCCCAaaTCATCCTACAaAaAaCr	CAGGTCTCTGCCCAAATGTAAGGTCTTCATAGAGGTCTCCCCAGGTCATCCTACAGAGAG[CG]GCGGCCCTGTGGCTTGCTTTTGCTCCCAGCCCTTACATCTCTGACTTTCGTTTGTGTTAT	CAGGTCTCTGCCCAAATGTAAGGTCTTCATAGAGGTCTCCCCAGGTCATCCTACAGAGAG[CG]GCGGCCCTGTGGCTTGCTTTTGCTCCCAGCCCTTACATCTCTGACTTTCGTTTGTGTTAT	GRCm10															FALSE	Ankfn1	NM_172534.2	chr11	89390222	89418948	28727	-
1.48873	1.54673	15.5237	1.1931e-10	8.53415e-07	13.5156	cg29913341	63642332	ACATCATACTCTCCCAAATCACTCTAACATCACAATACAAAAAAACAATC						cg	R	B	C	II	1	11	89126193	Mus musculus	mm10	CATCATaCTCTCCCAaaTCACTCTAaCATCACAaTaCAAAaAAaCAATCr	ATGGCCCTGGAGCATCATGCTCTCCCAGGTCACTCTAGCATCACAGTGCAAAGAAGCAAT[CG]CCTGCCGTGGTGAGCACTCATCCTTGGCATTACCCAGCCTCTGCTCTGCTCTTTAGGACC	ATGGCCCTGGAGCATCATGCTCTCCCAGGTCACTCTAGCATCACAGTGCAAAGAAGCAAT[CG]CCTGCCGTGGTGAGCACTCATCCTTGGCATTACCCAGCCTCTGCTCTGCTCTTTAGGACC	GRCm10															FALSE	.	.	.	.	.	.	.
-1.15796	1.4199	-15.118	1.73568e-10	1.21124e-06	13.2384	cg29983948	45769315	ATACTCTAAAAAAACATCCTTCCTATATATACTCTAAAAAAACATCCTTC						mu	F	T	C	II	1	11	96690443	Mus musculus	mm10	TaCTCTAaAaAAaCATCCTTCCTaTaTaTaCTCTAaAaAAaCATCCTTCr	NNNNNNNNNNNNNNNNNNNNNNNNNNNNNNNNNNNNNNNNNNNNNNNNNNNNNNNNNNNN[NN]NNNNNNNNNNNNNNNNNNNNNNNNNNNNNNNNNNNNNNNNNNNNNNNNNNNNNNNNNNNN	AGGAACTTGGCCATTTAAGTATTGGAGACTCACGGTGGACCCTAATTAGCTGTAAGATTA[CG]AAGGATGCTTCTCTAGAGCACACACAGGAAGGATGCTTCTCTAGAGCACACACAGGAAGG	GRCm10															TRUE	Skap1	NM_001177898.1	chr11	96464590	96759622	295033	+
2.31117	2.83793	15.0098	1.92096e-10	1.30861e-06	13.1627	cg38375299	27762549	AACAATAATTCCCCAATTTCCTAAATTTATCACTAACATTTTAAAAATAC						cg	R	B	C	II	1	2	51365001	Mus musculus	mm10	aCAaTaATTCCCCAATTTCCTaAATTTaTCACTaaCATTTTaaAAATACr	AGTCACCTGATGGCAGTGATTCCCCAATTTCCTGAATTTGTCACTGGCATTTTGGAAATA[CG]TGAAGTTGTAGATAGTTCTCACTTCTGATGGAAAGAGATCACTTTGATAATGAGGGTAGG	AGTCACCTGATGGCAGTGATTCCCCAATTTCCTGAATTTGTCACTGGCATTTTGGAAATA[CG]TGAAGTTGTAGATAGTTCTCACTTCTGATGGAAAGAGATCACTTTGATAATGAGGGTAGG	GRCm10															TRUE	.	.	.	.	.	.	.
-1.04542	0.597374	-14.3891	3.48204e-10	2.27301e-06	12.7127	cg29901124	14705431	TACATCAAAAATCAAAATACTAACRCRATAAACTTCAACCTATCATTCAC						cg	R	B	C	II	1	11	88222310	Mus musculus	mm10	ACATCAAaAATCAAAATaCTaaCrCraTAaACTTCAaCCTATCATTCACr	AATTATATTTTTACATCAAGAATCAAAATGCTGGCGCGGTAGACTTCAGCCTATCATTCA[CG]AGCCTTTTATCCTGTAATTAAGCCAGCTCTGCTGCTGGGTTAATTCTTCCCTGAGTGACA	AATTATATTTTTACATCAAGAATCAAAATGCTGGCGCGGTAGACTTCAGCCTATCATTCA[CG]AGCCTTTTATCCTGTAATTAAGCCAGCTCTGCTGCTGGGTTAATTCTTCCCTGAGTGACA	GRCm10															FALSE	.	.	.	.	.	.	.
1.23293	-0.455093	14.3851	3.49552e-10	2.27301e-06	12.7097	cg34927429	78611400	TACAATCTTCTAAAATATAAATAAATTCCCATTCRCAACCAAAAAAACCC						cg	F	T	C	II	1	17	43077054	Mus musculus	mm10	ACAATCTTCTAAaATaTaAaTaaaTTCCCATTCrCAACCAAaAAAaCCCr	AATAAATAAATAAATAAATAAATAAATAAATAAATAAAAGGGAGTGAGGAAGAGAGTAAG[CG]GGCTTTCTTGGTTGCGAATGGGAACCCACTCACATCTTAGAAGATTGTAGCCAAGCTCAG	AATAAATAAATAAATAAATAAATAAATAAATAAATAAAAGGGAGTGAGGAAGAGAGTAAG[CG]GGCTTTCTTGGTTGCGAATGGGAACCCACTCACATCTTAGAAGATTGTAGCCAAGCTCAG	GRCm10															FALSE	Tnfrsf21	NM_178589.3	chr17	43016554	43089188	72635	+
1.80325	2.84074	14.2592	3.95479e-10	2.51451e-06	12.6151	cg29921133	68722433	CTAAATATATATACTTCTAAAACTCAAACTCAAAACTTCTTATACATTCC						cg	R	B	C	II	1	11	89978019	Mus musculus	mm10	TAAATaTATaTaCTTCTaaaaCTCAAaCTCAaaACTTCTTATACATTCCr	CGCCACCAATGCTAAATGTATGTGCTTCTGGGGCTCAAGCTCAGGACTTCTTATACATTC[CG]CAAGCGCTCTGCCTGCCTATGTAGCTACAGCCCCAGATCTACTTACTCTTGTCACCACTA	CGCCACCAATGCTAAATGTATGTGCTTCTGGGGCTCAAGCTCAGGACTTCTTATACATTC[CG]CAAGCGCTCTGCCTGCCTATGTAGCTACAGCCCCAGATCTACTTACTCTTGTCACCACTA	GRCm10															FALSE	.	.	.	.	.	.	.
1.53828	-2.79664	14.0891	4.67949e-10	2.9106e-06	12.4854	cg29848053	24672192	TCCCAAACAACAAAATCCATTTACTCAAAAAAACAAATACCCTTATTAAC						cg	R	B	C	II	1	11	83064921	Mus musculus	mm10	CCCAAaCAaCAAAaTCCATTTaCTCAAAAaAaCAaaTaCCCTTaTTAACr	GCCTCAGGCATTCCCAAGCAGCAAAGTCCATTTGCTCAAAAGAGCAGGTGCCCTTGTTAA[CG]CCTTTAGAGTCCCTCCAGTCCCGGGTTTAAGATGGGCACAGCAGGATCCTCTCTGCCAGC	GCCTCAGGCATTCCCAAGCAGCAAAGTCCATTTGCTCAAAAGAGCAGGTGCCCTTGTTAA[CG]CCTTTAGAGTCCCTCCAGTCCCGGGTTTAAGATGGGCACAGCAGGATCCTCTCTGCCAGC	GRCm10															FALSE	Slfn2	NM_011408.1	chr11	83064911	83065111	201	+
1.08942	0.053359	13.826	6.0918e-10	3.66241e-06	12.2805	cg29911966	56668249	TCCAAAATATCATACTCCCTACCRTAACAACAATAAAAAAATCCTCTAAC						cg	R	B	C	II	1	11	89023505	Mus musculus	mm10	CCAaaATATCATaCTCCCTaCCrTaACAACAATaaAaaAATCCTCTaACr	TTGGATCAGGCTCCAGGATATCATGCTCCCTGCCGTGACAACAATGGAGGAATCCTCTGA[CG]CTGCAAACAAGCCCCCAATCAAATGCTTCCTTTTTATAAGAGTTGCCTCAGTGGTCATGG	TTGGATCAGGCTCCAGGATATCATGCTCCCTGCCGTGACAACAATGGAGGAATCCTCTGA[CG]CTGCAAACAAGCCCCCAATCAAATGCTTCCTTTTTATAAGAGTTGCCTCAGTGGTCATGG	GRCm10															FALSE	.	.	.	.	.	.	.
1.90519	-0.89838	13.8175	6.14421e-10	3.66241e-06	12.2738	cg29847420	19651826	AATTTCTCATTCCCAATTTATAACCTTTAATTACTAAAATTAATAACCTC						cg	R	B	C	II	1	11	82975555	Mus musculus	mm10	aTTTCTCATTCCCAaTTTATaACCTTTAaTTACTaAaATTAaTAaCCTCr	TACCTACCATAAGTTTCTCATTCCCAGTTTATGACCTTTAGTTACTGAGATTAGTAGCCT[CG]GTCCTAACCTAGAAGGAAGGTTTTCCTTGATCGTAAATTTATTCCAAGCCTATTTGCTTT	TACCTACCATAAGTTTCTCATTCCCAGTTTATGACCTTTAGTTACTGAGATTAGTAGCCT[CG]GTCCTAACCTAGAAGGAAGGTTTTCCTTGATCGTAAATTTATTCCAAGCCTATTTGCTTT	GRCm10															TRUE	.	.	.	.	.	.	.
-1.29457	2.52772	-13.3711	9.71145e-10	5.67061e-06	11.9137	cg29906934	63602469	AACRCATTATCTTCRCTCTAAAATAAATCAAAATCTCCCTTCCCAAAAAC						cg	F	T	C	II	1	11	88668570	Mus musculus	mm10	aCrCATTATCTTCrCTCTAAaaTaaaTCAAaaTCTCCCTTCCCAaAaaCr	GCTTCACTGCCGGCCGGAGGAGGAAGGGCGACATCCAGTGAAAACGTAAAAAGAAGCAAG[CG]CCTCTGGGAAGGGAGACCTTGACCCACCTTAGAGCGAAGATAATGCGCTAGAGCCCGTGT	GCTTCACTGCCGGCCGGAGGAGGAAGGGCGACATCCAGTGAAAACGTAAAAAGAAGCAAG[CG]CCTCTGGGAAGGGAGACCTTGACCCACCTTAGAGCGAAGATAATGCGCTAGAGCCCGTGT	GRCm10															FALSE	Msi2	NM_054043.3	chr11	88339381	88718229	378849	-
-0.998964	-0.658619	-13.2942	1.0522e-09	6.021e-06	11.8501	cg29914450	7729420	AATCTATCCTCCAAACACTCCAAATTCAAAATCTATTTAAATTAAACTTC						mu	F	T	C	II	1	11	89231144	Mus musculus	mm10	aTCTaTCCTCCAAACACTCCAAaTTCAaaATCTaTTTaAATTaaACTTCr	NNNNNNNNNNNNNNNNNNNNNNNNNNNNNNNNNNNNNNNNNNNNNNNNNNNNNNNNNNNN[NN]NNNNNNNNNNNNNNNNNNNNNNNNNNNNNNNNNNNNNNNNNNNNNNNNNNNNNNNNNNNN	CCTTTCATTTAGAAGCCTTAGTTACAGAGAACACTGCCTTTACTAGTGAATTAGGGAATA[CG]AAGTCCAATTCAAACAGATCCTGAACTTGGAGTGTTTGGAGGACAGACCTTCACTCCCCA	GRCm10															TRUE	.	.	.	.	.	.	.
0.940651	2.42667	13.2456	1.1072e-09	6.21154e-06	11.8096	cg29904495	82805471	CAACCTCCCTCCTATATTAACCATATTTTAATACTAAAATTCAAATACCC						cg	F	T	C	II	1	11	88482290	Mus musculus	mm10	AaCCTCCCTCCTaTaTTaaCCATaTTTTaaTACTaAAATTCAaATaCCCr	TGAAAGACATGGCTTTTTTGGGGGGGAGATTTTTTTTTAATTCAAAATATTTATTTCCTA[CG]GGCATCTGAATTTCAGTACCAAAACATGGCCAACACAGGAGGGAGGCTGTTTTCTTCGCT	TGAAAGACATGGCTTTTTTGGGGGGGAGATTTTTTTTTAATTCAAAATATTTATTTCCTA[CG]GGCATCTGAATTTCAGTACCAAAACATGGCCAACACAGGAGGGAGGCTGTTTTCTTCGCT	GRCm10															FALSE	Msi2	NM_054043.3	chr11	88339381	88718229	378849	-
0.963762	-0.415125	13.0172	1.40927e-09	7.75413e-06	11.6168	cg29778982	95638460	ACATAAACTCACCAAAACTATCAACRACACACAAAATAAAACTATAAACC						cg	F	T	C	II	1	11	76480198	Mus musculus	mm10	CATaaACTCACCAaAaCTaTCAaCrACACACAaaATaAaaCTaTaaaCCr	CGGCCCAGCACCTCAGCTGTTAACTCTCACACTCTCTCCTGGAATGCTTCTCTCCTTAGT[CG]GCCCACAGCCTCATCCTGTGTGTCGCTGACAGCTCTGGTGAGTCCATGCTGACTCTGTCG	CGGCCCAGCACCTCAGCTGTTAACTCTCACACTCTCTCCTGGAATGCTTCTCTCCTTAGT[CG]GCCCACAGCCTCATCCTGTGTGTCGCTGACAGCTCTGGTGAGTCCATGCTGACTCTGTCG	GRCm10															FALSE	Abr	NM_198018.2	chr11	76416731	76509419	92689	-
1.73536	0.867326	12.953	1.50914e-09	8.14695e-06	11.5618	cg29847338	9725975	TAACTTCTCCTACTCTAACAACCTATATCTCTTCCAAACATTATTTATAC						cg	R	B	C	II	1	11	82970792	Mus musculus	mm10	aACTTCTCCTACTCTaACAACCTaTaTCTCTTCCAaaCATTATTTATACr	ACATCTCCGTATGACTTCTCCTACTCTGACAACCTGTGTCTCTTCCAGGCATTATTTATA[CG]TAAAATCATTTCCTCAGAAATTGTATTTATTGATTACACAGCTTTTCAAAATGCATTTTG	ACATCTCCGTATGACTTCTCCTACTCTGACAACCTGTGTCTCTTCCAGGCATTATTTATA[CG]TAAAATCATTTCCTCAGAAATTGTATTTATTGATTACACAGCTTTTCAAAATGCATTTTG	GRCm10															FALSE	.	.	.	.	.	.	.
2.15707	-0.426167	12.9114	1.57787e-09	8.36026e-06	11.526	cg29847936	97783250	AAAAATCAAAACCRAAAAATCCAAATCCTTTACRCTCCAAATCCCAATAC						cg	F	T	C	II	1	11	83040054	Mus musculus	mm10	AaAATCAaAaCCraaAAaTCCAAaTCCTTTaCrCTCCAaaTCCCAaTaCr	AAATCAATGCCACCTCCATGCGCCCTGGGACCTGGAGCGCGCTCGCTGGGACCTGGAGCA[CG]CACTGGGACCTGGAGCGCAAAGGACTTGGACTTCCCGGCTCTGATTCTTCACGAGTTGTT	AAATCAATGCCACCTCCATGCGCCCTGGGACCTGGAGCGCGCTCGCTGGGACCTGGAGCA[CG]CACTGGGACCTGGAGCGCAAAGGACTTGGACTTCCCGGCTCTGATTCTTCACGAGTTGTT	GRCm10															FALSE	Slfn10-ps	NR_073524.1	chr11	83028122	83040533	12412	-
-0.86962	-0.206486	-12.7948	1.78865e-09	9.30478e-06	11.4248	cg29922375	12804488	CCATTACRAAATCATCAATCACTAACCTCAATCATTCTAACCCTAATAAC						cg	F	T	C	II	1	11	90097402	Mus musculus	mm10	CATTACrAaATCATCAaTCACTaaCCTCAaTCATTCTaACCCTaATaACr	GACCTGAAAACCTTTCCTGGGGAGTTAAAAGTGTTTTGCAGAGAAGAGCAATACCATCTT[CG]TCATCAGGGTCAGAATGACTGAGGCCAGTGACTGATGATCTCGTAATGGGTTTTGGACAG	GACCTGAAAACCTTTCCTGGGGAGTTAAAAGTGTTTTGCAGAGAAGAGCAATACCATCTT[CG]TCATCAGGGTCAGAATGACTGAGGCCAGTGACTGATGATCTCGTAATGGGTTTTGGACAG	GRCm10															FALSE	.	.	.	.	.	.	.
0.944695	-0.138731	12.7344	1.90935e-09	9.75527e-06	11.372	cg29905741	55707836	TTTTTCCTTTAATAAACAACACCTTAAATTATTTCTTTAAATACTAACAC						cg	R	B	C	II	1	11	88581789	Mus musculus	mm10	TTTTCCTTTAaTaAACAaCACCTTAAATTaTTTCTTTaAATaCTAACACr	AGTCTCATTTATTTTTCCTTTAGTGAACAGCACCTTAAATTGTTTCTTTGAATGCTAACA[CG]CCATAAGCAAGTCAGAAAATATTTACCTCTGCCTCCAATTATAAAAGGCCGTTAGCGACC	AGTCTCATTTATTTTTCCTTTAGTGAACAGCACCTTAAATTGTTTCTTTGAATGCTAACA[CG]CCATAAGCAAGTCAGAAAATATTTACCTCTGCCTCCAATTATAAAAGGCCGTTAGCGACC	GRCm10															FALSE	Msi2	NM_054043.3	chr11	88339381	88718229	378849	-
-1.46336	0.202572	-12.4629	2.56973e-09	1.2899e-05	11.1303	cg29858472	53635247	CAAATAAAACTAATTTAATAACRTACTATAATCCCTCTAACTACCAAACC						cg	F	T	C	II	1	11	84159455	Mus musculus	mm10	AaATaAaaCTaATTTaaTAaCrTaCTaTAATCCCTCTaaCTaCCAaaCCr	GCTGGTGAACTGGGTCTGAAAGATGAGAGGAAGCCTAGAGATTGTCTAAGCAAAAGAACT[CG]GCCTGGCAGCCAGAGGGATTACAGCACGCTACCAAATCAGCCTCATCTGTCAGTGTAGTA	GCTGGTGAACTGGGTCTGAAAGATGAGAGGAAGCCTAGAGATTGTCTAAGCAAAAGAACT[CG]GCCTGGCAGCCAGAGGGATTACAGCACGCTACCAAATCAGCCTCATCTGTCAGTGTAGTA	GRCm10															FALSE	Gm11437	NM_001037932.2	chr11	84148360	84167476	19117	-
-1.61204	-2.00318	-12.2919	3.10702e-09	1.5327e-05	10.9748	cg38379725	62736223	TAACTCRAATACCTTTAAAACAAAAATCCTCTTAACCCAAACCAATACCC						cg	F	T	C	II	1	2	51972486	Mus musculus	mm10	AaCTCraaTaCCTTTaaAaCAaaAaTCCTCTTAACCCAAACCAaTaCCCr	GTTGTTGTTGTTGTTTTTGGAAGGAGATGTTGAAAGGAGAATATTCAATGTAAGTTCTAG[CG]GGCACTGGTTTGGGTTAAGAGGACTCCTGCTCCAAAGGCACCCGAGCTACCTTGTGTGCC	GTTGTTGTTGTTGTTTTTGGAAGGAGATGTTGAAAGGAGAATATTCAATGTAAGTTCTAG[CG]GGCACTGGTTTGGGTTAAGAGGACTCCTGCTCCAAAGGCACCCGAGCTACCTTGTGTGCC	GRCm10		chr2:51972744-51972995													FALSE	Nmi	NM_001141949.1	chr2	51948498	51973208	24711	-
1.1262	1.08783	12.2391	3.29608e-09	1.59841e-05	10.9262	cg29902602	16698526	ACAACACACATACACACACTAATTAATAAACAATAATATTAACAACACCA	45794425	ACAACGCGCATACACACACTAATTAATAAACAATAATATTAACAACACCG	A	Red	R	cg	F	T	C	I	1	11	88334772	Mus musculus	mm10	aCAACrCrCATACACACACTaATTaATAAACAATaaTaTTaaCAaCACCr	ATCTTTAACAGAGGCTTACAAGGGATTAAGTAACTGACTTTAACTGACTCAAAGGGCAAA[CG]GTGCTGCCAACACCATTGTTTATCAATCAGTGTGTGTATGCGCGTTGCTTTTTAACATTT	ATCTTTAACAGAGGCTTACAAGGGATTAAGTAACTGACTTTAACTGACTCAAAGGGCAAA[CG]GTGCTGCCAACACCATTGTTTATCAATCAGTGTGTGTATGCGCGTTGCTTTTTAACATTT	GRCm10															FALSE	.	.	.	.	.	.	.
1.17014	-0.0680738	12.1435	3.67008e-09	1.75011e-05	10.8376	cg29902089	81799377	CRTAAACACTACCAACRATTAAAAAACATATTAATCAAAAACCACAACCC						cg	F	T	C	II	1	11	88294520	Mus musculus	mm10	rTaAACACTaCCAaCraTTaaAaAACATaTTaaTCAaaAaCCACAACCCr	TCGGGCGCACACTCGGGCGCGGGCCGCTCAGTCCGCCTGGCTCTTCCTGATGGCTCGCAG[CG]GGTTGTGGCTCCTGACCAACATGTTCTCCAACCGCTGGCAGTGTTCACGAAGCTGCTTCT	TCGGGCGCACACTCGGGCGCGGGCCGCTCAGTCCGCCTGGCTCTTCCTGATGGCTCGCAG[CG]GGTTGTGGCTCCTGACCAACATGTTCTCCAACCGCTGGCAGTGTTCACGAAGCTGCTTCT	GRCm10			chr11:88294375-88294588	chr11	88294375	88294588	213	20	143	18.8	67.1	0.84			FALSE	Ccdc182	NM_028859.1	chr11	88294042	88295261	1220	+
-1.89069	-2.57017	-11.9798	4.41904e-09	2.07272e-05	10.6838	cg29905091	8780902	AATTAACTTCTATATAAATCTACTCCAACCCCAAACTATTACCATAAATC						cg	F	T	C	II	1	11	88529095	Mus musculus	mm10	aTTAaCTTCTaTaTaaATCTaCTCCAaCCCCAAaCTaTTACCATaAaTCr	AACGGAAATGCCCCATGTCAGGGAACGTTTGTTTTCATTTCCTTCTTCCATCAATGAATT[CG]ACTCATGGTAACAGCTTGGGGCTGGAGCAGATCCACACAGAAGCTAACCAGAAGCATTTG	AACGGAAATGCCCCATGTCAGGGAACGTTTGTTTTCATTTCCTTCTTCCATCAATGAATT[CG]ACTCATGGTAACAGCTTGGGGCTGGAGCAGATCCACACAGAAGCTAACCAGAAGCATTTG	GRCm10															FALSE	Msi2	NM_054043.3	chr11	88339381	88718229	378849	-
1.11148	1.57964	11.908	4.79665e-09	2.21355e-05	10.6157	cg29846415	40650342	CTCAAAACACAAAACAAACCAACTAATAACTATAAAAACTCTCATCCACA	30762859	CTCGAAACGCGAAACAAACCAACTAATAACTATAAAAACTCTCATCCACG	G	Grn	G	cg	R	B	C	I	1	11	82926076	Mus musculus	mm10	CTCraAaCrCrAaaCAaACCAaCTaaTaaCTaTaaAaaCTCTCATCCACr	GGCTCTGTGTGGCTCGGAGCGCGAGGCAGACCAGCTGGTGGCTGTGGAGGCTCTCATCCA[CG]CCTCCACGAAGCTCAGCCGGGCCACCTTCATCATCACCAACGGAGTGACACTTCTTAAGC	GGCTCTGTGTGGCTCGGAGCGCGAGGCAGACCAGCTGGTGGCTGTGGAGGCTCTCATCCA[CG]CCTCCACGAAGCTCAGCCGGGCCACCTTCATCATCACCAACGGAGTGACACTTCTTAAGC	GRCm10															FALSE	Unc45b	NM_178680.4	chr11	82911252	82943406	32155	+
-0.826366	0.664536	-11.8309	5.24163e-09	2.3805e-05	10.5418	cg29904156	74701834	AAAAACCCTTATTAACAATACTTAATATAAATCTTATTTCRCCTATTACC						cg	F	T	C	II	1	11	88455315	Mus musculus	mm10	AaaACCCTTaTTAaCAATACTTaaTaTAaaTCTTaTTTCrCCTaTTaCCr	ATCGGGTGCTAATAAAGATGTACCAGCCTAGAAATGCTAGTAAACATTGCTTTGTTGCCA[CG]GCAACAGGCGAAACAAGACCTACACCAAGTATTGCTAACAAGGGTCCTTGTGATCAAGAG	ATCGGGTGCTAATAAAGATGTACCAGCCTAGAAATGCTAGTAAACATTGCTTTGTTGCCA[CG]GCAACAGGCGAAACAAGACCTACACCAAGTATTGCTAACAAGGGTCCTTGTGATCAAGAG	GRCm10															FALSE	Msi2	NM_054043.3	chr11	88339381	88718229	378849	-
0.8298	-1.19637	11.7308	5.88486e-09	2.63086e-05	10.4451	cg29768745	68694160	TAAAACAAATAATAAAAAACCTATTACTCAAAAACTTATCCCTAAACTAC						cg	R	B	C	II	1	11	75632342	Mus musculus	mm10	aAaACAaATAATAAaAAACCTaTTACTCAaAAACTTaTCCCTAaaCTACr	GAGTAGACTCGTGAGACAGATAATAAGAAACCTGTTACTCAGAAACTTGTCCCTAGGCTA[CG]TGAAGGCCTTGGCAGGATTTGTTGTGTGCCAAGGATCTGCAAGGTAGGAGAGGGGAAGGG	GAGTAGACTCGTGAGACAGATAATAAGAAACCTGTTACTCAGAAACTTGTCCCTAGGCTA[CG]TGAAGGCCTTGGCAGGATTTGTTGTGTGCCAAGGATCTGCAAGGTAGGAGAGGGGAAGGG	GRCm10													chr11:75630686-75631233		FALSE	Inpp5k	NM_008916.2	chr11	75631019	75648865	17847	+
1.6457	2.30951	11.7003	6.09658e-09	2.68358e-05	10.4156	cg29906109	3712939	AACAAAACRTATAACCCTTACTTCAAAACTCTTTAATTTAACTAAAAACC						cg	F	T	C	II	1	11	88607957	Mus musculus	mm10	aCAAAaCrTaTaaCCCTTaCTTCAAAaCTCTTTaATTTaaCTaaaAaCCr	CCCTCACTTAGGACAGCAGGAAGACGAGTGTCTTCGATGTTCCAATGCCTTTGGGGAGCA[CG]GCTCCCAGCCAAATCAAAGAGCTTTGAAGCAAGGGCCACACGCTTTGCTCATGTTCCACA	CCCTCACTTAGGACAGCAGGAAGACGAGTGTCTTCGATGTTCCAATGCCTTTGGGGAGCA[CG]GCTCCCAGCCAAATCAAAGAGCTTTGAAGCAAGGGCCACACGCTTTGCTCATGTTCCACA	GRCm10															FALSE	Msi2	NM_054043.3	chr11	88339381	88718229	378849	-
-1.06684	-5.58172	-11.5895	6.93899e-09	3.00812e-05	10.307	cg32700915	91637448	CTCTATAACCTCCCRTTAATACTTCTTATAAAAACCCAATAATTAAAATC						cg	R	B	C	II	1	14	76504148	Mus musculus	mm10	TCTaTAaCCTCCCrTTAaTaCTTCTTaTAAaAACCCAATAATTaAAATCr	CAGAACACAGCCTCTGTAGCCTCCCGTTAGTGCTTCTTGTAAGAACCCAATAATTGAAAT[CG]AGACGCCGGCGTTCCTGAGTCTTAGTGGTGGGACTGGGCATGCCCAGTAGCTCGGCTGGG	CAGAACACAGCCTCTGTAGCCTCCCGTTAGTGCTTCTTGTAAGAACCCAATAATTGAAAT[CG]AGACGCCGGCGTTCCTGAGTCTTAGTGGTGGGACTGGGCATGCCCAGTAGCTCGGCTGGG	GRCm10			chr14:76504147-76504595	chr14	76504147	76504595	448	49	317	21.9	70.8	0.88			FALSE	Tsc22d1	NM_001310646.1	chr14	76414960	76507765	92806	+
1.18157	-2.35513	11.5534	7.23913e-09	3.09139e-05	10.2714	cg29921826	44649342	CTCCAATCTCTAAAAACTCTAAAATAATAATCCRAAATTATCATATCCCC						cg	F	T	C	II	1	11	90033352	Mus musculus	mm10	TCCAaTCTCTaaaaACTCTaAaaTaATaATCCraAATTATCATaTCCCCr	TTCTTCCTTCTTCTTTTCCTCACCAGCAGATTCAGAGTTTTGGCATGCTCCAACTCCGCT[CG]GGGACATGATAATTCCGGATCATCACCTCAGAGTCCCCAGAGACTGGAGCCAGCCTCGGC	TTCTTCCTTCTTCTTTTCCTCACCAGCAGATTCAGAGTTTTGGCATGCTCCAACTCCGCT[CG]GGGACATGATAATTCCGGATCATCACCTCAGAGTCCCCAGAGACTGGAGCCAGCCTCGGC	GRCm10															FALSE	Tmem100	NM_026433.2	chr11	90030347	90036505	6159	+
1.48529	3.52933	11.4309	8.36458e-09	3.51947e-05	10.1496	cg29901606	44609189	CRCTTACTTCCTATTCTATCTTCATAAAATCAAAAATACTCTTAACACCC						cg	F	T	C	II	1	11	88255970	Mus musculus	mm10	rCTTaCTTCCTATTCTaTCTTCATaaAaTCAAaaATaCTCTTAaCACCCr	TGTTGTTTAGAAGCCACCCAGTCTACAGCATGCTCTTCTCAGAGCCAGAATAGACTAATA[CG]GGTGCTAAGAGCATCCTTGACTCCATGAAGACAGAATAGGAAGCAAGCGTGAATCACCTC	TGTTGTTTAGAAGCCACCCAGTCTACAGCATGCTCTTCTCAGAGCCAGAATAGACTAATA[CG]GGTGCTAAGAGCATCCTTGACTCCATGAAGACAGAATAGGAAGCAAGCGTGAATCACCTC	GRCm10															FALSE	.	.	.	.	.	.	.
0.836637	0.479624	11.402	8.65683e-09	3.58965e-05	10.1206	cg29910008	13773193	CATCTCTCAAATCTTAAAACTATCCCCATCCTAAAAAATTACTTCCCTAC						cg	F	T	C	II	1	11	88884731	Mus musculus	mm10	ATCTCTCAAaTCTTAAaACTaTCCCCATCCTAAaAAATTaCTTCCCTaCr	TACTCTTCCATAGTCTTGGCTCTTTCTCTCTCTCTGTCTCCAGGATGCAGGGCTAGAGAA[CG]CAGGGAAGCAATTTCTTAGGATGGGGACAGTCTTAAGACTTGAGAGATGTGCGGAGTGTA	TACTCTTCCATAGTCTTGGCTCTTTCTCTCTCTCTGTCTCCAGGATGCAGGGCTAGAGAA[CG]CAGGGAAGCAATTTCTTAGGATGGGGACAGTCTTAAGACTTGAGAGATGTGCGGAGTGTA	GRCm10															FALSE	.	.	.	.	.	.	.
0.883093	-0.615767	11.3404	9.31509e-09	3.80742e-05	10.0586	cg29778591	58698185	CCTCCATTTATAAAAACTCTAATCTCTTTAAATAACCCCATCATAAAATC						cg	R	B	C	II	1	11	76447282	Mus musculus	mm10	CTCCATTTATAAaAaCTCTaATCTCTTTAAATaaCCCCATCATAAAATCr	CTTTGTGACTTCCTCCATTTATAAGAGCTCTGATCTCTTTAAATGGCCCCATCATAAAAT[CG]CCCTGGCTTGCCTTTCCCCTGCTGACCCAGCCAGCTTTGACTGGTTGGACCCTGGGAATA	CTTTGTGACTTCCTCCATTTATAAGAGCTCTGATCTCTTTAAATGGCCCCATCATAAAAT[CG]CCCTGGCTTGCCTTTCCCCTGCTGACCCAGCCAGCTTTGACTGGTTGGACCCTGGGAATA	GRCm10															FALSE	Abr	NM_001291186.1	chr11	76416731	76468465	51735	-
2.39446	2.02165	11.2914	9.87655e-09	3.98006e-05	10.009	cg38366046	13753376	CTACACAACRAATAACTAATAAACTTTCATATACCAAACATATATTCAAC						cg	R	B	C	II	1	2	50069595	Mus musculus	mm10	TaCACAaCrAaTaACTaaTaaACTTTCATATaCCAAACATaTATTCAaCr	AAACACAGTTGCTGCACAGCGAGTGACTGGTGGACTTTCATATGCCAAACATGTATTCAG[CG]GCCAAGAGAGAGGAAATAGAATTCTTCGCCTCTGTTTCTGCTGAGTAAGATGGCTGCACT	AAACACAGTTGCTGCACAGCGAGTGACTGGTGGACTTTCATATGCCAAACATGTATTCAG[CG]GCCAAGAGAGAGGAAATAGAATTCTTCGCCTCTGTTTCTGCTGAGTAAGATGGCTGCACT	GRCm10														chr2:50066300-50067004	FALSE	Lypd6	NM_177139.5	chr2	50066428	50193569	127142	+
1.0023	0.317857	11.2564	1.03001e-08	4.09308e-05	9.97339	cg29906385	6697925	TCCTTAAATACCTCTAAAACRCTAAAATCRCTAATACCACTAAAATAAAC						cg	F	T	C	II	1	11	88626603	Mus musculus	mm10	CCTTaAATaCCTCTAaaaCrCTAaaaTCrCTaaTACCACTaAaATaaaCr	AGTGCTGCTGCCTGGTCTAACATCTTCTCTCCTTGCCGTCCCAGGCATGGCCAGCAACAA[CG]CCCATCTCAGTGGTACCAGCGACCCTAGCGCCCTAGAGGCATTCAAGGACTTGAGGCTTA	AGTGCTGCTGCCTGGTCTAACATCTTCTCTCCTTGCCGTCCCAGGCATGGCCAGCAACAA[CG]CCCATCTCAGTGGTACCAGCGACCCTAGCGCCCTAGAGGCATTCAAGGACTTGAGGCTTA	GRCm10															FALSE	Msi2	NM_054043.3	chr11	88339381	88718229	378849	-
1.59546	3.43948	11.1811	1.12763e-08	4.36109e-05	9.89644	cg29899966	81742190	TATACCCRTACAACAAATCTATATCTTACTTTCAATATAACATTCAACAC						cg	F	T	C	II	1	11	88146247	Mus musculus	mm10	aTACCCrTaCAaCAaaTCTaTaTCTTACTTTCAaTaTaaCATTCAACACr	CTGGGCACAGAAATCTGACACAAAGCCTGCTTTATACTGATCGTTGACAAGCTCGTGTAA[CG]TGTTGAATGCCACACTGAAAGTAAGACACAGACCTGCTGCACGGGTACACATTCATTCCA	CTGGGCACAGAAATCTGACACAAAGCCTGCTTTATACTGATCGTTGACAAGCTCGTGTAA[CG]TGTTGAATGCCACACTGAAAGTAAGACACAGACCTGCTGCACGGGTACACATTCATTCCA	GRCm10															FALSE	Cuedc1	NM_198013.3	chr11	88099145	88194140	94996	+
0.795691	0.82485	11.1809	1.12794e-08	4.36109e-05	9.89621	cg41741297	99795370	ATTCCTAAAATACACACTATACTCAAAAAACCAACATTAAAAAATAACAC						cg	F	T	C	II	1	4	152062985	Mus musculus	mm10	TTCCTAAAATACACACTaTaCTCAaaAaACCAaCATTaaAAAaTAaCACr	TTAACTTCCCTGGAACAATCAGCCTGCACAGAAAGACATCAGAGCTCTCAGTCCTGCCAA[CG]TGCTACTTTCCAATGCTGGTCTCCTGAGCACAGTGTGTATTTTAGGAATTTTATGTGTAC	TTAACTTCCCTGGAACAATCAGCCTGCACAGAAAGACATCAGAGCTCTCAGTCCTGCCAA[CG]TGCTACTTTCCAATGCTGGTCTCCTGAGCACAGTGTGTATTTTAGGAATTTTATGTGTAC	GRCm10															FALSE	.	.	.	.	.	.	.
0.93494	-0.390317	11.1467	1.17544e-08	4.48416e-05	9.86109	cg47583295	82788247	AAAAAACACCCAAAAAACACACAACCCACCATAAAATATATATACTTACA	48706373	AAAAAACACCCGAAAAACGCGCGACCCACCGTAAAATATATATACTTACG	T	Red	R	cg	F	T	C	I	1	X	42149775	Mus musculus	mm10	aAaaaaCACCCraAaaaCrCrCraCCCACCrTaAaaTaTaTaTaCTTaCr	CCCGGAGCGCCCGGCCTTCTCGGCTCCCTCCCGGCCGGCCGCACGCTCTCTTCGCCCGAT[CG]CAAGCACACACACCTCACGGTGGGCCGCGCGCCCTCCGGGTGCCCCTCCAAACTTCTAGA	CCCGGAGCGCCCGGCCTTCTCGGCTCCCTCCCGGCCGGCCGCACGCTCTCTTCGCCCGAT[CG]CAAGCACACACACCTCACGGTGGGCCGCGCGCCCTCCGGGTGCCCCTCCAAACTTCTAGA	GRCm10			chrX:42148875-42150543	chrX	42148875	42150543	1668	150	1012	18	60.7	0.98			FALSE	Stag2	NM_021465.4	chrX	42149200	42150500	1301	+
-1.25615	-1.74077	-11.0941	1.25276e-08	4.71623e-05	9.80679	cg29900211	50723582	ACAATAAAAAAAACACTATCTCCTAACCCCTAAAACTAATTATATAACCA	35713256	ACAATAAAAAAAACACTATCTCCTAACCCCTAAAACTAATTATATAACCG	A	Red	R	cg	F	T	C	I	1	11	88162902	Mus musculus	mm10	aCAaTaaaAaAaaCACTaTCTCCTaACCCCTaaaaCTaATTaTaTAaCCr	GGATCCCACAAGCTCTCTCTGACTGTCATCAGGGCCTTCTCTCCCTGCACACAATTCTGA[CG]GCTACACAATCAGCCCCAGGGGTCAGGAGACAGTGCCTCTCCCACTGCCAATTTGACTGT	GGATCCCACAAGCTCTCTCTGACTGTCATCAGGGCCTTCTCTCCCTGCACACAATTCTGA[CG]GCTACACAATCAGCCCCAGGGGTCAGGAGACAGTGCCTCTCCCACTGCCAATTTGACTGT	GRCm10															FALSE	Cuedc1	NM_198013.3	chr11	88099145	88194140	94996	+
0.847037	-2.58222	10.985	1.43091e-08	5.31695e-05	9.69318	cg29922674	19716584	ACATAAACACTAAAATACTAAACAATATTAACRACTCCTACCTAATACAC						cg	F	T	C	II	1	11	90130222	Mus musculus	mm10	CATAAACACTAaAaTaCTaaaCAaTaTTAACraCTCCTaCCTAATaCACr	ACCCGAGACGCTCTGTCTGTGACGTCAATCGCTGCTGGCTTTGGACAGAGGTCGTTCTCT[CG]TGCATTAGGCAGGAGCCGTTAACACTGCCCAGCACTCTAGTGTTTATGTGGAAAATGTGA	ACCCGAGACGCTCTGTCTGTGACGTCAATCGCTGCTGGCTTTGGACAGAGGTCGTTCTCT[CG]TGCATTAGGCAGGAGCCGTTAACACTGCCCAGCACTCTAGTGTTTATGTGGAAAATGTGA	GRCm10															FALSE	.	.	.	.	.	.	.
-1.09724	-2.0672	-10.9268	1.53683e-08	5.63732e-05	9.63201	cg29956822	61756496	TACAACTAATACTCCTAATCTATAAATCRCCTCTTAAACCCCTAAAAATC						cg	R	B	C	II	1	11	94729762	Mus musculus	mm10	aCAaCTAATACTCCTAATCTaTaAATCrCCTCTTaAaCCCCTAaaaaTCr	TCCTCAGGAAATGCAGCTAATACTCCTAATCTGTGAATCGCCTCTTGAGCCCCTAGGGGT[CG]CTTTAACAATTCTAGCTCTGTCTCTATGCCCTACAGACAGAGAGACCCAAGATTAAAACA	TCCTCAGGAAATGCAGCTAATACTCCTAATCTGTGAATCGCCTCTTGAGCCCCTAGGGGT[CG]CTTTAACAATTCTAGCTCTGTCTCTATGCCCTACAGACAGAGAGACCCAAGATTAAAACA	GRCm10															FALSE	.	.	.	.	.	.	.
1.48474	3.66094	10.9069	1.57489e-08	5.70381e-05	9.61103	cg38339614	56603863	AAAATATATAACAAATATTCCTTTCCAAATCACTTTTAATCCAAATATCA	6766247	AAAATATATAACAAATATTCCTTTCCAAATCGCTTTTAATCCAAATATCG	A	Red	R	cg	R	B	C	I	1	2	45330220	Mus musculus	mm10	aAAATATATAACAAATaTTCCTTTCCAAaTCrCTTTTaaTCCAAaTATCr	GATTGCAGCATGGAAATATATAACAAATGTTCCTTTCCAAGTCGCTTTTGGTCCAAGTAT[CG]TACCACAGAAACATAATGAAACTAAAACACTAAGCATGCATGAAACTCTGAGGTCAATCA	GATTGCAGCATGGAAATATATAACAAATGTTCCTTTCCAAGTCGCTTTTGGTCCAAGTAT[CG]TACCACAGAAACATAATGAAACTAAAACACTAAGCATGCATGAAACTCTGAGGTCAATCA	GRCm10															FALSE	.	.	.	.	.	.	.
-1.07009	1.54532	-10.8863	1.61535e-08	5.77721e-05	9.58927	cg29910428	68654418	ATAAAAAATCAACAACACAACTCAATAATCAATAAAAACATCTACCACCA	63655946	ATAAAAAATCAACGACGCAACTCAATAATCAATAAAAACATCTACCACCG	T	Red	R	cg	F	T	C	I	1	11	88910750	Mus musculus	mm10	aTAAAaAaTCAaCrACrCAaCTCAaTaaTCAaTAAAaaCATCTACCACCr	GCAGCGGACACTCTGTTTCCACCGTGCAGGTTCTGGGGATTGAACTTGGGTCATCCGTCT[CG]GTGGTAGATGCCTTTACTGACCACTGAGCTGCGTCGCTGACTCTTTACCTACCTCAGTGT	GCAGCGGACACTCTGTTTCCACCGTGCAGGTTCTGGGGATTGAACTTGGGTCATCCGTCT[CG]GTGGTAGATGCCTTTACTGACCACTGAGCTGCGTCGCTGACTCTTTACCTACCTCAGTGT	GRCm10															FALSE	Scpep1os	NR_045955.1	chr11	88905927	88936061	30135	+
0.942099	-0.648595	10.8385	1.71337e-08	6.05212e-05	9.53867	cg29851513	4788381	AACCRTATTCTTCAAAACCRCCAATATCTACTTCAAAATTATTCTACTTC						cg	R	B	C	II	1	11	83457463	Mus musculus	mm10	ACCrTaTTCTTCAAAACCrCCAATaTCTaCTTCAAaATTaTTCTaCTTCr	CAACAGTACTGGACCGTGTTCTTCAAAACCGCCAATGTCTGCTTCAAGATTGTTCTGCTT[CG]CTGGCTCCTGCCTGGCCGTGGAGAGGGCGGGGTGAAGGGGGAGGGGGATCAGCCCAGCCT	CAACAGTACTGGACCGTGTTCTTCAAAACCGCCAATGTCTGCTTCAAGATTGTTCTGCTT[CG]CTGGCTCCTGCCTGGCCGTGGAGAGGGCGGGGTGAAGGGGGAGGGGGATCAGCCCAGCCT	GRCm10															FALSE	Mmp28	NM_001320300.1	chr11	83440767	83463040	22274	-
0.985045	1.73168	10.7589	1.89115e-08	6.59865e-05	9.45371	cg29896641	13612426	TACATCCTTCATAAACACCAACATAATATATAACAACAAAATAACCCTCA	19614591	TACATCCTTCGTAAACGCCAACATAATATATAACAACGAAATAACCCTCG	G	Grn	G	cg	R	B	C	I	1	11	87871457	Mus musculus	mm10	TACATCCTTCrTaaACrCCAaCATaaTaTATaaCAaCrAaaTaACCCTCr	GATCAACGCACTTACATCCTTCGTGGACGCCAGCATGGTGTATGGCAGCGAGGTGACCCT[CG]CCCTGCGGCTCCGTAATAGGACCAACTTCCTGGGGCTGCTGGCCACGAACCAGCGATTCC	GATCAACGCACTTACATCCTTCGTGGACGCCAGCATGGTGTATGGCAGCGAGGTGACCCT[CG]CCCTGCGGCTCCGTAATAGGACCAACTTCCTGGGGCTGCTGGCCACGAACCAGCGATTCC	GRCm10			chr11:87871383-87871613	chr11	87871383	87871613	230	19	140	16.5	60.9	0.92			FALSE	Epx	NM_007946.2	chr11	87863997	87875536	11540	-
1.70523	-1.27067	10.7416	1.93238e-08	6.66128e-05	9.43512	cg47832434	45780943	CTAAAAACAAACAAAAACCAAAACAATACCACCCAACAATTAAAAAAACA	91743416	CTAAAAACGAACGAAAACCGAAACAATACCGCCCGACGATTAAAAAAACG	T	Red	R	cg	F	T	C	I	1	X	94122821	Mus musculus	mm10	CTaaAAACraaCraaaACCraaaCAaTaCCrCCCraCraTTaaaaAaaCr	AGGCCTCGCCCCCGCACGGTGCCCCGGGTCGGCCACGTCGCCCACCCGGGACCCCTCAGC[CG]CCTCCCCAACCGCCGGGCGGCACTGCCCCGGTCCCCGCCCGTTTCCAGAACGCGCCTCGA	AGGCCTCGCCCCCGCACGGTGCCCCGGGTCGGCCACGTCGCCCACCCGGGACCCCTCAGC[CG]CCTCCCCAACCGCCGGGCGGCACTGCCCCGGTCCCCGCCCGTTTCCAGAACGCGCCTCGA	GRCm10			chrX:94122087-94123678	chrX	94122087	94123678	1591	180	1109	22.6	69.7	0.94			FALSE	Zfx	NM_001044386.1	chrX	94074630	94123407	48778	-
1.06197	-1.58048	10.7299	1.96068e-08	6.67836e-05	9.42259	cg29925335	6668392	CTAAAAACTTTACCAATCTATTTAAAATTAAAACTACCTCTCAATTATCC						cg	F	T	C	II	1	11	90371563	Mus musculus	mm10	TaaAaACTTTaCCAaTCTaTTTAAAATTaaaaCTaCCTCTCAaTTATCCr	AGCATAAATCGCATTCCAGAGCTGGAGAGAAACAGACCTCAGATGCTCTGCTCCTCGGCA[CG]GATAACTGAGAGGCAGCCCCAATTTTAAACAGACTGGCAAAGTCTCCAGAGCCATCCCTG	AGCATAAATCGCATTCCAGAGCTGGAGAGAAACAGACCTCAGATGCTCTGCTCCTCGGCA[CG]GATAACTGAGAGGCAGCCCCAATTTTAAACAGACTGGCAAAGTCTCCAGAGCCATCCCTG	GRCm10															FALSE	Hlf	NM_172563.3	chr11	90336534	90390917	54384	-
1.54918	1.54505	10.6205	2.24839e-08	7.56825e-05	9.30433	cg38375295	76656287	ACCCRTCAAAAAATAAACTAAAAACCTTCACTTTCATAAAAATCAAATTC						cg	R	B	C	II	1	2	51364345	Mus musculus	mm10	CCCrTCAAaaaaTaaACTaAaAACCTTCACTTTCATaAaAaTCAaATTCr	GACAGGAGGCAGCCCGTCAAGGGGTGGACTGAGAACCTTCACTTTCATGAGAGTCAGATT[CG]CTTGTTTATTTACGTCACACAGATTGGGAGATATTGATGAATGGATTCACAGATGGGGGA	GACAGGAGGCAGCCCGTCAAGGGGTGGACTGAGAACCTTCACTTTCATGAGAGTCAGATT[CG]CTTGTTTATTTACGTCACACAGATTGGGAGATATTGATGAATGGATTCACAGATGGGGGA	GRCm10															FALSE	.	.	.	.	.	.	.
-1.4603	-2.63969	-10.4554	2.77e-08	9.21561e-05	9.12343	cg29900864	53652383	CCAACTAAACTTAACACTATAACCATACTAAATTACTATATATATTAACC						cg	F	T	C	II	1	11	88205058	Mus musculus	mm10	CAACTaaACTTAACACTaTaaCCATaCTAaaTTaCTaTaTaTATTaaCCr	CGAAGGAAAGAGCAGCCTGGTAGGGGTGAGCTGAAATGGGCCTCCCGCCTAAAGGAGGCA[CG]GCCAATACACACAGCAACCTAGCATGGCCACAGTGTTAAGTCCAGTTGGTTAGCTCTCAT	CGAAGGAAAGAGCAGCCTGGTAGGGGTGAGCTGAAATGGGCCTCCCGCCTAAAGGAGGCA[CG]GCCAATACACACAGCAACCTAGCATGGCCACAGTGTTAAGTCCAGTTGGTTAGCTCTCAT	GRCm10													chr11:88204160-88204603		FALSE	Mrps23	NM_001291270.1	chr11	88194105	88211507	17403	+
-1.12637	-5.54876	-10.4125	2.92575e-08	9.62187e-05	9.07585	cg33959032	65733924	TTCCAATTTACCTTCCTTCCAACCTCCTCCAACTCATTAATATAATTTTC						cg	F	T	C	II	1	16	17722386	Mus musculus	mm10	TCCAATTTACCTTCCTTCCAaCCTCCTCCAACTCATTaATaTaaTTTTCr	GGCAGCCAGAGATTTTACACGGGTGCCGCGTGGCTTCTTTTATAAAATAAATAAATAAAA[CG]AAAACCACATCAATGAGTTGGAGGAGGCTGGAAGGAAGGTAAATTGGAAGATTGATGTGT	GGCAGCCAGAGATTTTACACGGGTGCCGCGTGGCTTCTTTTATAAAATAAATAAATAAAA[CG]AAAACCACATCAATGAGTTGGAGGAGGCTGGAAGGAAGGTAAATTGGAAGATTGATGTGT	GRCm10		chr16:17722635-17722942													FALSE	Med15	NM_001285886.1	chr16	17651207	17722900	71694	-
-2.02272	3.47859	-11.604	3.11877e-08	0.000101401	8.94492	cg41107470	94781241	AATAATACCAAAATAACAATATCTTCTTCCTAATTCTCTCCTTATACCCC						cg	F	T	C	II	1	4	87432068	Mus musculus	mm10	ATaaTaCCAaAATaACAaTaTCTTCTTCCTAATTCTCTCCTTaTaCCCCr	TAATTGTTACAAACTTGATATTGCATTTGCACCAGTCAGTATTCAGTTAGGACAGTAAAA[CG]GGGCACAAGGAGAGAATTAGGAAGAAGACACTGTCATTCTGGCACCATTTACACATCATA	TAATTGTTACAAACTTGATATTGCATTTGCACCAGTCAGTATTCAGTTAGGACAGTAAAA[CG]GGGCACAAGGAGAGAATTAGGAAGAAGACACTGTCATTCTGGCACCATTTACACATCATA	GRCm10															FALSE	.	.	.	.	.	.	.
0.967489	-0.696585	10.2688	3.51767e-08	0.000113086	8.91519	cg47826283	97806136	TAATAACAATAAAAAAACCTCTCCACAAAAACCTACAATACCAATAACCA	54681861	TAATAACGATAAAAAAACCTCTCCACGAAAACCTACGATACCAATAACCG	A	Red	R	cg	F	T	C	I	1	X	93288690	Mus musculus	mm10	TaaTaaCraTaaAaaAACCTCTCCACraaaACCTaCraTaCCAaTaaCCr	GCCTCCTCCAGGGCGCGGCGGCGGCGGCTGCAGCGGCGGCGGCGGCCGCAGCGGCGGCCA[CG]GCCACTGGCACCGCAGGTCCCCGTGGAGAGGTTCCTCCACCGCCACCACCAGCTGCACGG	GCCTCCTCCAGGGCGCGGCGGCGGCGGCTGCAGCGGCGGCGGCGGCCGCAGCGGCGGCCA[CG]GCCACTGGCACCGCAGGTCCCCGTGGAGAGGTTCCTCCACCGCCACCACCAGCTGCACGG	GRCm10			chrX:93288436-93289354	chrX	93288436	93289354	918	83	562	18.1	61.2	0.97		chrX:93286379-93286608	FALSE	Arx	NM_001305940.1	chrX	93286506	93298357	11852	+
-2.26677	0.540003	-10.2176	3.75844e-08	0.000119483	8.8573	cg29853378	92775301	ACTCCAACTATATCAAATTAACACAAAACTAACCACTACATTTCTTTAAC						cg	R	B	C	II	1	11	83686574	Mus musculus	mm10	CTCCAaCTaTaTCAAaTTaACACAAAACTAaCCACTACATTTCTTTAACr	TTTCTGTGATAACTCCAGCTGTGTCAAGTTGACACAAAACTAGCCACTACATTTCTTTAA[CG]TCATTTTCTTCACCCTCCCAGGACATATGTTTCCCTAAGAGAGTTGAACCTCTTTGACTG	TTTCTGTGATAACTCCAGCTGTGTCAAGTTGACACAAAACTAGCCACTACATTTCTTTAA[CG]TCATTTTCTTCACCCTCCCAGGACATATGTTTCCCTAAGAGAGTTGAACCTCTTTGACTG	GRCm10															FALSE	.	.	.	.	.	.	.
0.943026	1.63375	10.2079	3.80613e-08	0.00011967	8.84626	cg38667494	31683373	TTCATAAATCTAACACACTATTTATCTAACAATACACTTAATACTACTTC						cg	R	B	C	II	1	2	90987461	Mus musculus	mm10	TCATaAATCTaACACACTATTTATCTaACAaTaCACTTAaTACTaCTTCr	GCTACACTATCTTCATGAATCTGACACACTATTTATCTGACAGTGCACTTAGTACTGCTT[CG]CCAGGGAAAATCACACAAAACAAGCCTGGTGCATCAGCACTTTCATTGTGTGCTGAGCTG	GCTACACTATCTTCATGAATCTGACACACTATTTATCTGACAGTGCACTTAGTACTGCTT[CG]CCAGGGAAAATCACACAAAACAAGCCTGGTGCATCAGCACTTTCATTGTGTGCTGAGCTG	GRCm10															FALSE	Celf1	NM_198683.2	chr2	90940396	91019497	79102	+
2.37127	-2.56362	10.1517	4.09368e-08	0.000127312	8.78247	cg35064943	53715489	TACACAATTTCCCACATAATAATAACACTACTAATAACATCTAATAAACA	10715209	TACACGATTTCCCGCATAATAATAACGCTACTAATAACGTCTAATAAACG	T	Red	R	cg	R	B	C	I	1	17	57087545	Mus musculus	mm10	TaCACrATTTCCCrCATaaTaaTaaCrCTaCTaaTaaCrTCTaATaaACr	CCGGCTTGCAGGTGCACGATTTCCCGCATGGTGGTGGCGCTGCTGGTGGCGTCTGATGGA[CG]GGTGTCGACCGGCCGCTGTGGCTCTAGCTCTGGACGAGATGGCTGCGGAGCTCTGTCTCT	CCGGCTTGCAGGTGCACGATTTCCCGCATGGTGGTGGCGCTGCTGGTGGCGTCTGATGGA[CG]GGTGTCGACCGGCCGCTGTGGCTCTAGCTCTGGACGAGATGGCTGCGGAGCTCTGTCTCT	GRCm10			chr17:57087448-57087687	chr17	57087448	57087687	239	25	159	20.9	66.5	0.95			FALSE	Tubb4a	NM_009451.3	chr17	57080065	57087782	7718	-
1.12655	-3.20269	10.1319	4.20081e-08	0.000129239	8.75982	cg29748693	88682534	TTCTACRATAAATCCACRTAAATAACTCCCTAAAAAATTAATAACCAACC						cg	F	T	C	II	1	11	73326765	Mus musculus	mm10	TCTaCrATaAaTCCACrTaAaTAACTCCCTaaaAAaTTAATaACCAaCCr	CAAGTAAAGCTTCCTGCAGGAGACAAACTGTACACAGTAACAAGGTACGTATGCGAGCTG[CG]GCTGGTCATTAACTTCCCAGGGAGTTACTCACGTGGACTCATCGCAGAAACTTGAGAAAT	CAAGTAAAGCTTCCTGCAGGAGACAAACTGTACACAGTAACAAGGTACGTATGCGAGCTG[CG]GCTGGTCATTAACTTCCCAGGGAGTTACTCACGTGGACTCATCGCAGAAACTTGAGAAAT	GRCm10	chr11:73329494-73329751														FALSE	.	.	.	.	.	.	.
-0.942737	1.54277	-10.0534	4.65449e-08	0.000140206	8.66977	cg29906049	7792930	TTCTCTATTACTTTACCCAATACAAATATTCTTCCAATAAAACAAACCTC						cg	F	T	C	II	1	11	88603881	Mus musculus	mm10	TCTCTATTaCTTTaCCCAaTaCAAaTaTTCTTCCAATaaAaCAaACCTCr	AGCACTGGGCCAGCCAGGAACATGGCTACATGTGCCACATTACTGATGGTTTTATAACCA[CG]AGGTCTGCTCCATTGGAAGAACACTTGCACTGGGCAAAGCAATAGAGAAGAGCCTCTCGC	AGCACTGGGCCAGCCAGGAACATGGCTACATGTGCCACATTACTGATGGTTTTATAACCA[CG]AGGTCTGCTCCATTGGAAGAACACTTGCACTGGGCAAAGCAATAGAGAAGAGCCTCTCGC	GRCm10															FALSE	Msi2	NM_054043.3	chr11	88339381	88718229	378849	-
0.768504	0.842915	10.0461	4.69907e-08	0.000140206	8.66139	cg41337683	9671186	CRAACTAAACTATCTACTAATAACTATTTTCTAAACRCCCTAACAAATCC						cg	R	B	C	II	1	4	118243960	Mus musculus	mm10	raaCTaaaCTaTCTaCTaATaACTATTTTCTaAACrCCCTaaCAaATCCr	GGGAGTGGCTGCGGGCTGGGCTGTCTGCTGATGACTATTTTCTGAACGCCCTGGCAGATC[CG]CCTGGTCAGCGAAATGGTGTAACCGAAATGCCCCAGAGCTCAGGAGTGCATACAGATGGA	GGGAGTGGCTGCGGGCTGGGCTGTCTGCTGATGACTATTTTCTGAACGCCCTGGCAGATC[CG]CCTGGTCAGCGAAATGGTGTAACCGAAATGCCCCAGAGCTCAGGAGTGCATACAGATGGA	GRCm10															FALSE	Ptprf	NM_011213.2	chr4	118208212	118291397	83186	-
0.75551	-1.61869	10.0453	4.70431e-08	0.000140206	8.66041	cg29905421	8718820	AACAAACCAACACTACACAAATATAAATCCACTTATAATTACAAATTACC						cg	F	T	C	II	1	11	88555803	Mus musculus	mm10	ACAaACCAaCACTACACAaATATaAATCCACTTaTAATTACAaATTaCCr	AGACTACAGAGGACGAGCCTCCCCCAGAGAGGCCCCTGTGCTTTCTGTCCACAGCACCTA[CG]GCAATCTGTAATTACAAGTGGATTCATATCTGTGTAGTGCTGGTCTGTCAGTTTTCCCCT	AGACTACAGAGGACGAGCCTCCCCCAGAGAGGCCCCTGTGCTTTCTGTCCACAGCACCTA[CG]GCAATCTGTAATTACAAGTGGATTCATATCTGTGTAGTGCTGGTCTGTCAGTTTTCCCCT	GRCm10															FALSE	Msi2	NM_054043.3	chr11	88339381	88718229	378849	-
0.714199	0.144626	9.91105	5.61482e-08	0.000165617	8.50456	cg29884021	58810124	AAACAAACAAAATTCCACACCTATACAAAATCAAAACCAACCCTATAAAC						cg	R	B	C	II	1	11	86737772	Mus musculus	mm10	AaCAaACAAAaTTCCACACCTaTaCAaAaTCAaAACCAaCCCTATaaaCr	ACTACTACCCTGAGCAGACAAAGTTCCACACCTGTGCAGAGTCAGAACCAGCCCTATGGG[CG]GGGCTCTATCAGACGCCTCCGAAGCTGGGCGGAGCCAGTCTAGAGAACTCTCTCCAGAAA	ACTACTACCCTGAGCAGACAAAGTTCCACACCTGTGCAGAGTCAGAACCAGCCCTATGGG[CG]GGGCTCTATCAGACGCCTCCGAAGCTGGGCGGAGCCAGTCTAGAGAACTCTCTCCAGAAA	GRCm10															FALSE	Cltc	NM_001003908.1	chr11	86694652	86757492	62841	-
-0.760863	1.18919	-9.90029	5.69544e-08	0.000166281	8.49198	cg29910700	3689820	AAACAAAATAACATTTATTTAATTTACATCCAAAATACCCCAAAACTACC						cg	R	B	C	II	1	11	88932048	Mus musculus	mm10	AaCAaaaTAaCATTTaTTTaaTTTACATCCAAaATACCCCAaaACTACCr	GATCTTTGAACAAGCAGGGTAGCATTTGTTTGGTTTACATCCAAGATACCCCAGGACTAC[CG]GGTCAAGGAGTCCCCTTTCTTCCGTGTAGCTGCTGAGGGCTTTGTTTTGACCTCTGTCTT	GATCTTTGAACAAGCAGGGTAGCATTTGTTTGGTTTACATCCAAGATACCCCAGGACTAC[CG]GGTCAAGGAGTCCCCTTTCTTCCGTGTAGCTGCTGAGGGCTTTGTTTTGACCTCTGTCTT	GRCm10															FALSE	Scpep1	NM_029023.3	chr11	88924019	88955442	31424	-
1.16576	-2.30349	9.88848	5.78535e-08	0.0001672	8.47815	cg29766403	94801249	TAACCTATATTATCTTTCCAACRTACTATAACTTTTCCTAACTTATCCAC						cg	R	B	C	II	1	11	75468024	Mus musculus	mm10	aaCCTaTATTATCTTTCCAaCrTaCTaTAACTTTTCCTaaCTTaTCCACr	CTGGGGCTTCCTGGCCTGTATTATCTTTCCAGCGTGCTGTAACTTTTCCTGGCTTGTCCA[CG]CCCCTATCTCTCGGCTGCTCATTGATTGGCGCAGCCATGGGGCCACCTCGGGTGAAGCCA	CTGGGGCTTCCTGGCCTGTATTATCTTTCCAGCGTGCTGTAACTTTTCCTGGCTTGTCCA[CG]CCCCTATCTCTCGGCTGCTCATTGATTGGCGCAGCCATGGGGCCACCTCGGGTGAAGCCA	GRCm10															FALSE	Tlcd2	NM_001291156.1	chr11	75467849	75468049	201	+
1.75117	-3.77973	9.85579	6.04217e-08	0.000172876	8.43978	cg28661543	74703916	ACTTTTCRTCAACRCCTTCTACTACRAAATTATTACAACTAATAACTTTC						cg	F	T	C	II	1	10	75667615	Mus musculus	mm10	CTTTTCrTCAaCrCCTTCTaCTaCrAAaTTaTTaCAaCTAaTaaCTTTCr	ACAGCCCAGCCCGACCAAGCCCCGGGCCGGAGCCCAGGCGTGGGTGTGCGCCTGCGAAAA[CG]AAAGCCACTAGCTGCAACAACTTCGCAGCAGAAGGCGCTGACGAAAAGCTGCGCGGTGCC	ACAGCCCAGCCCGACCAAGCCCCGGGCCGGAGCCCAGGCGTGGGTGTGCGCCTGCGAAAA[CG]AAAGCCACTAGCTGCAACAACTTCGCAGCAGAAGGCGCTGACGAAAAGCTGCGCGGTGCC	GRCm10			chr10:75667304-75668076	chr10	75667304	75668076	772	71	526	18.4	68.1	0.8			TRUE	Cabin1	NM_172549.3	chr10	75646109	75764357	118249	-
-0.681574	-0.752894	-9.82991	6.254e-08	0.000177165	8.40932	cg29905057	4724854	AAACCCAAATACCTTTCTACAAATCCCCTACTTTTAATAACTACAACATC						cg	F	T	C	II	1	11	88526584	Mus musculus	mm10	AACCCAaaTACCTTTCTACAaATCCCCTaCTTTTAATAACTACAACATCr	GAATACAGTGACTGCACAGGAGACAGGACCCTTCTTAGGTGGGAACCTTTAGCTCCAAAA[CG]ATGTTGTAGTTATTAAAAGCAGGGGATCTGTAGAAAGGTACCTGGGTTTGGGTCACGAGC	GAATACAGTGACTGCACAGGAGACAGGACCCTTCTTAGGTGGGAACCTTTAGCTCCAAAA[CG]ATGTTGTAGTTATTAAAAGCAGGGGATCTGTAGAAAGGTACCTGGGTTTGGGTCACGAGC	GRCm10															FALSE	Msi2	NM_054043.3	chr11	88339381	88718229	378849	-
-1.74791	-4.27595	-9.79346	6.56583e-08	0.000183902	8.36626	cg38680247	91603560	ACRAAAATACTACRACCCRAAACCRAATAATAAATAAACTAATAATACTC						cg	R	B	C	II	1	2	92183854	Mus musculus	mm10	CraAaaTaCTaCraCCCraaaCCraaTaaTaAATaaaCTaaTaaTaCTCr	GGGCTGAGGCGGCGGAGGTGCTGCGGCCCGGGGCCGGGTGGTGAATGGGCTGGTGGTGCT[CG]CTGCTGCTGCTGAGAGGAGGAGGAGGAGGATGAAGAGTTGGGCTTGTTTGTCTCCCACAG	GGGCTGAGGCGGCGGAGGTGCTGCGGCCCGGGGCCGGGTGGTGAATGGGCTGGTGGTGCT[CG]CTGCTGCTGCTGAGAGGAGGAGGAGGAGGATGAAGAGTTGGGCTTGTTTGTCTCCCACAG	GRCm10															FALSE	Phf21a	NM_138755.2	chr2	92182681	92183981	1301	+
-1.28925	3.81848	-9.78727	6.62037e-08	0.000183902	8.35894	cg30226295	5660234	CCTAAATAAATACTACTTATATTTATACRACCAACRTCTTACTAAATCAC						cg	R	B	C	II	1	11	116296793	Mus musculus	mm10	CTaaATAAATaCTaCTTaTaTTTaTaCraCCAACrTCTTaCTAaaTCACr	GCTGCCTGGCCCCTGGATAAATGCTGCTTGTGTTTGTGCGGCCAACGTCTTGCTAGGTCA[CG]AGCATGATTTCCGAGTTAAGCACCTGTCGGAGGCCCTGAACGACAAGCGCGGGCCACTGG	GCTGCCTGGCCCCTGGATAAATGCTGCTTGTGTTTGTGCGGCCAACGTCTTGCTAGGTCA[CG]AGCATGATTTCCGAGTTAAGCACCTGTCGGAGGCCCTGAACGACAAGCGCGGGCCACTGG	GRCm10															FALSE	Exoc7	NM_016857.2	chr11	116287997	116306738	18742	-
-1.26205	2.87108	-9.74949	6.96394e-08	0.000191586	8.31412	cg29847763	31646858	TTTTCTCTAAATCCACATCTATAAAATTTAAACAATTCTCTACCAAACAC						cg	R	B	C	II	1	11	83017061	Mus musculus	mm10	TTTCTCTaAATCCACATCTATAaAaTTTAAACAATTCTCTACCAAACACr	CCAATGCTTGCTTTTCTCTGAATCCACATCTATAGAGTTTAAACAATTCTCTACCAAACA[CG]TCCAAGCATATATGAAAAACATAATTCCAGAATACATCTCCGCATTTGCAAACACCCAGG	CCAATGCTTGCTTTTCTCTGAATCCACATCTATAGAGTTTAAACAATTCTCTACCAAACA[CG]TCCAAGCATATATGAAAAACATAATTCCAGAATACATCTCCGCATTTGCAAACACCCAGG	GRCm10															FALSE	Slfn8	NM_001167743.1	chr11	83002157	83020722	18566	-
0.802568	0.632722	9.71239	7.3197e-08	0.000199455	8.26994	cg35559853	69617201	AATACTCTATTATACTCATAACTCATAAATAACCATCTATCCTTATAACC						cg	R	B	C	II	1	18	31995817	Mus musculus	mm10	aTACTCTaTTaTaCTCATaaCTCATAaaTAaCCATCTaTCCTTaTaACCr	TTTTCATCTGGGGTACTCTGTTGTGCTCATGGCTCATAGGTAGCCATCTGTCCTTGTGAC[CG]CACACAGTCCTCTCTCGGTGTATCTATGTACTGATACCTTCTTTTAATGACACAGGCCAT	TTTTCATCTGGGGTACTCTGTTGTGCTCATGGCTCATAGGTAGCCATCTGTCCTTGTGAC[CG]CACACAGTCCTCTCTCGGTGTATCTATGTACTGATACCTTCTTTTAATGACACAGGCCAT	GRCm10															FALSE	Myo7b	NM_032394.3	chr18	31959233	32036931	77699	-
0.862752	-0.923292	9.68253	7.62001e-08	0.00020568	8.23425	cg45561052	78640852	ACCTAATAAAACTACRTCATTCCTTAAACAATAAAACTAACTAACTTATC						cg	F	T	C	II	1	8	33987281	Mus musculus	mm10	CCTAATaaaaCTACrTCATTCCTTAAACAATaaaaCTaaCTAACTTaTCr	ATGGAAGTGAAGAATAACCCCCTTCAGGATACATTGGCCAGAGACAAGGTTGCCAGGGAA[CG]ACAAGTTAGCCAGCCCCATTGTTTAAGGAATGACGTAGCCCCATTAGGCATGTTAAGCCA	ATGGAAGTGAAGAATAACCCCCTTCAGGATACATTGGCCAGAGACAAGGTTGCCAGGGAA[CG]ACAAGTTAGCCAGCCCCATTGTTTAAGGAATGACGTAGCCCCATTAGGCATGTTAAGCCA	GRCm10															FALSE	.	.	.	.	.	.	.
0.660385	0.7872	9.66364	7.81664e-08	0.000209016	8.21162	cg33960980	51727323	TCTTCTCRAAAAATCCATACTACAACTACTCTATTAAATTAAATCAACTC						cg	R	B	C	II	1	16	17866168	Mus musculus	mm10	CTTCTCraaAaaTCCATaCTaCAaCTaCTCTaTTAaaTTAAaTCAaCTCr	TTTCTCATTGCTCTTCTCGGGAGGTCCATGCTGCAGCTGCTCTGTTAGGTTAAGTCAGCT[CG]CACTCTACTCCTATTGCAGTTCTTTAAAAATTATGGGCACATGTCTATAGTTCCAACACT	TTTCTCATTGCTCTTCTCGGGAGGTCCATGCTGCAGCTGCTCTGTTAGGTTAAGTCAGCT[CG]CACTCTACTCCTATTGCAGTTCTTTAAAAATTATGGGCACATGTCTATAGTTCCAACACT	GRCm10															FALSE	Dgcr2	NM_010048.3	chr16	17840354	17891728	51375	-
-1.53103	-3.99005	-9.59654	8.55974e-08	0.000225155	8.13088	cg29947127	23653362	AAAAAATCAAATATCATTCTAAAAAACACTCACCCAATATTTAACTTCCA	53755856	AAAAAATCGAATATCATTCTAAAAAACACTCGCCCAATATTTAACTTCCG	T	Red	R	cg	F	T	C	I	1	11	93968430	Mus musculus	mm10	aaaaAaTCraATaTCATTCTAaaaAaCACTCrCCCAaTaTTTAACTTCCr	AAACAGAAGATGGCCGCCAGACAGGGGGGGTAAAAAAATCCAAAACACCACACCCAGTGT[CG]GAAGTTAAACACTGGGCGAGTGCTCCCTAGAATGACATCCGACTCCCCAGAAGAAGCGGG	AAACAGAAGATGGCCGCCAGACAGGGGGGGTAAAAAAATCCAAAACACCACACCCAGTGT[CG]GAAGTTAAACACTGGGCGAGTGCTCCCTAGAATGACATCCGACTCCCCAGAAGAAGCGGG	GRCm10															FALSE	Nme1	NM_008704.2	chr11	93958924	93968521	9598	-
0.72249	-0.025612	9.59501	8.57761e-08	0.000225155	8.12902	cg29767704	74664202	AACACACAAACTAACAATACAATAACACTTTCTTTCTATTTATAACTCCC						cg	F	T	C	II	1	11	75550205	Mus musculus	mm10	ACACACAaaCTaaCAaTaCAaTaaCACTTTCTTTCTaTTTaTaACTCCCr	ATTTAGGGAGTTCTAAAGGCAACCTTGAAAACTCTTTTGTCTCCAAAATGAAAACATGGA[CG]GGAGTCACAAACAGAAAGAAAGTGCCACTGCACTGCCAGCCTGTGTGTCTGCGAGCTGGT	ATTTAGGGAGTTCTAAAGGCAACCTTGAAAACTCTTTTGTCTCCAAAATGAAAACATGGA[CG]GGAGTCACAAACAGAAAGAAAGTGCCACTGCACTGCCAGCCTGTGTGTCTGCGAGCTGGT	GRCm10															FALSE	Slc43a2	NM_173388.2	chr11	75531693	75577572	45880	+
-1.5837	1.46981	-9.57185	8.85168e-08	0.000230237	8.10102	cg38377334	9803988	CTACACCATACRACTAAAAAACCTCTAAATATCCTATACCAAAATATCTC						cg	R	B	C	II	1	2	51674796	Mus musculus	mm10	TaCACCATACrACTaAaaaaCCTCTaAaTaTCCTaTACCAaaATaTCTCr	AAAGTCTGTAGCTGCACCATACGACTGAGGGGCCTCTGAGTGTCCTGTACCAGGATGTCT[CG]TCCAACATCTGGATTTTTAGCACACCTGGATTCACTTTAGTATTCCAGCCACAAGCATGG	AAAGTCTGTAGCTGCACCATACGACTGAGGGGCCTCTGAGTGTCCTGTACCAGGATGTCT[CG]TCCAACATCTGGATTTTTAGCACACCTGGATTCACTTTAGTATTCCAGCCACAAGCATGG	GRCm10															FALSE	Gm13490	NR_040639.1	chr2	51656965	51732009	75045	-
-2.18437	1.68245	-9.52997	9.37116e-08	0.000241553	8.05021	cg30170848	88799207	ACAAACCAAACTAAAATATCACRTTAACAATATATCCAATCACACRTATC						mu	F	T	C	II	1	11	112332391	Mus musculus	mm10	CAaaCCAAaCTaaAATaTCACrTTaaCAATATATCCAaTCACACrTaTCr	NNNNNNNNNNNNNNNNNNNNNNNNNNNNNNNNNNNNNNNNNNNNNNNNNNNNNNNNNNNN[NN]NNNNNNNNNNNNNNNNNNNNNNNNNNNNNNNNNNNNNNNNNNNNNNNNNNNNNNNNNNNN	TACGTGTTTCCTACATTCCAGCAAATAGGCTTGCAAAGGGTGCCAAGGAAAGTCAAGACA[CG]ACACGTGTGACTGGATATATTGCCAACGTGACATTCCAGCTTGGCCTGTCCTTGATAGAC	GRCm10															TRUE	.	.	.	.	.	.	.
0.673066	-1.19739	9.5123	9.59984e-08	0.000245238	8.02871	cg29778471	5687495	AAAATAAAAAAACRCACAAACRACTCTAAAAAAAACTACTATCTACACCC						cg	R	B	C	II	1	11	76437196	Mus musculus	mm10	AaaTaaAaAAaCrCACAAaCraCTCTaaAaAaAaCTaCTaTCTaCACCCr	ATCCGGGCAGAAAGGTGGAGAAGCGCACAAGCGGCTCTGGAGAGAGCTGCTGTCTGCACC[CG]CCCGAGTGCTTAGCCGGACTGTTAGTGGAGCAGTCCCAAAGCAGCGGGTGTGGGCCTCCG	ATCCGGGCAGAAAGGTGGAGAAGCGCACAAGCGGCTCTGGAGAGAGCTGCTGTCTGCACC[CG]CCCGAGTGCTTAGCCGGACTGTTAGTGGAGCAGTCCCAAAGCAGCGGGTGTGGGCCTCCG	GRCm10			chr11:76436955-76437213	chr11	76436955	76437213	258	19	168	14.7	65.1	0.69			FALSE	Abr	NM_001291186.1	chr11	76416731	76468465	51735	-
0.73917	-1.13949	9.5006	9.75457e-08	0.00024613	8.01445	cg35834633	75602509	AATAATTCAAACTATATATTTAATAACATTATTTCAACTTCCAAACTCTC						cg	R	B	C	II	1	18	65025836	Mus musculus	mm10	aTaATTCAAACTaTaTaTTTaaTAACATTaTTTCAACTTCCAaACTCTCr	GTACTCTTCCTGGTGATTCAAACTGTGTGTTTGGTAACATTGTTTCAACTTCCAGACTCT[CG]CTTCTTGCCAAGAGGCTCCAGCACCTGGTTAATGATCTCTAGGGTAAATGACTCGAACCT	GTACTCTTCCTGGTGATTCAAACTGTGTGTTTGGTAACATTGTTTCAACTTCCAGACTCT[CG]CTTCTTGCCAAGAGGCTCCAGCACCTGGTTAATGATCTCTAGGGTAAATGACTCGAACCT	GRCm10															FALSE	Nedd4l	NM_001114386.1	chr18	64887755	65217826	330072	+
0.982835	1.30367	9.49669	9.80682e-08	0.00024613	8.00968	cg40453436	52772162	ATTATTTTTATAACCAATACTAATCTTAAACTACAAACCTATACATAACC						cg	F	T	C	II	1	3	145992313	Mus musculus	mm10	TTaTTTTTaTAaCCAaTaCTaaTCTTaAACTACAaACCTaTaCATaaCCr	CAGTGGATACAGTGCTTGCCCAGTGTACATAAAGCCCTGGGCTTGACCCCTTGCACCGCA[CG]GCCATGCACAGGTCTGTAGTTCAAGACCAGCACTGGCTACAAAAACAACATCAACAAATT	CAGTGGATACAGTGCTTGCCCAGTGTACATAAAGCCCTGGGCTTGACCCCTTGCACCGCA[CG]GCCATGCACAGGTCTGTAGTTCAAGACCAGCACTGGCTACAAAAACAACATCAACAAATT	GRCm10														chr3:145987645-145988894	FALSE	Syde2	NM_001166064.1	chr3	145987869	146021720	33852	+
0.725135	0.681144	9.47914	1.00452e-07	0.000249921	7.98825	cg35463301	55706990	CTAACCAAAATTACATTATACAAAATCRCTATAACCCTTATCCTAAAAAC						cg	R	B	C	II	1	18	15410986	Mus musculus	mm10	TAaCCAaAaTTaCATTaTaCAAAaTCrCTaTaACCCTTaTCCTaaAaACr	TATTTTCTGTGCTAGCCAGAGTTGCATTGTGCAAAGTCGCTGTGACCCTTGTCCTGGAGA[CG]CAGCACAAGACCTTTGCTCTGGGCATCCTGTCACAACACACAACATCAGCACACACTGCC	TATTTTCTGTGCTAGCCAGAGTTGCATTGTGCAAAGTCGCTGTGACCCTTGTCCTGGAGA[CG]CAGCACAAGACCTTTGCTCTGGGCATCCTGTCACAACACACAACATCAGCACACACTGCC	GRCm10															FALSE	Aqp4	NM_001308646.1	chr18	15410982	15411182	201	-
0.729335	-0.992598	9.36826	1.16998e-07	0.000288577	7.85195	cg34198397	90762336	AAACTTCTTATCTACAAACCCAATAACAAAATAATCTCTACTAAACAATC						cg	F	T	C	II	1	16	45953703	Mus musculus	mm10	aaCTTCTTaTCTACAaACCCAaTaACAAAaTAATCTCTaCTaaACAaTCr	ATGGCAGAAGCAGAGAGCAGGACTCGGAGGTGGTGGCAGAAAACAGTGGCTGAAAGCTAT[CG]ACTGTCCAGCAGAGATTACTTTGTCACTGGGTCTGTAGACAAGAAGCCTTAAGACTATCT	ATGGCAGAAGCAGAGAGCAGGACTCGGAGGTGGTGGCAGAAAACAGTGGCTGAAAGCTAT[CG]ACTGTCCAGCAGAGATTACTTTGTCACTGGGTCTGTAGACAAGAAGCCTTAAGACTATCT	GRCm10															FALSE	.	.	.	.	.	.	.
0.721143	0.942612	9.35558	1.19067e-07	0.00029117	7.83625	cg42106197	14741155	CCTTTAACTCATATCTAAACATTCATTAACTTTTTACTTCRTATCTATAC						cg	F	T	C	II	1	5	45524379	Mus musculus	mm10	CTTTAACTCATATCTAAaCATTCATTAACTTTTTACTTCrTATCTaTaCr	TACTAATAGGAGATGCCTGGCTAGATAAATACAATCATTTGGCTTGCAATATAGAATGTA[CG]CACAGATACGAAGTAAAAAGTTAATGAATGCTTAGATATGAGTTAAAGGTCAATGACAAT	TACTAATAGGAGATGCCTGGCTAGATAAATACAATCATTTGGCTTGCAATATAGAATGTA[CG]CACAGATACGAAGTAAAAAGTTAATGAATGCTTAGATATGAGTTAAAGGTCAATGACAAT	GRCm10														chr5:45520218-45520734	FALSE	Med28	NM_025895.4	chr5	45520228	45529284	9057	+
-0.700233	1.53744	-9.32886	1.23552e-07	0.000297868	7.80312	cg29895283	3726597	AAAACCCTTTATAATTCTAACTAAAATTAACCCTTCCTAAAATCCTTCTC						cg	F	T	C	II	1	11	87776928	Mus musculus	mm10	aaACCCTTTATaATTCTaaCTaaaaTTaACCCTTCCTAaAaTCCTTCTCr	CAGGAGGGTGAATAGGAATATCACATTGGGAAAAAAAGAGCAGAGTTAAAGAAGGAAAAT[CG]AGAAGGACTCTAGGAAGGGTCAACCCCAGCCAGAATCATAAAGGGTCCCTTGACAGAGGA	CAGGAGGGTGAATAGGAATATCACATTGGGAAAAAAAGAGCAGAGTTAAAGAAGGAAAAT[CG]AGAAGGACTCTAGGAAGGGTCAACCCCAGCCAGAATCATAAAGGGTCCCTTGACAGAGGA	GRCm10															FALSE	Bzrap1	NM_172449.2	chr11	87760540	87785928	25389	+
1.09017	-0.18435	9.3269	1.23888e-07	0.000297868	7.80069	cg29904526	6715908	ACTACTACTCTACCCAAAACTTCACAAAATTACTTTCCTAAATACAAAAC						cg	R	B	C	II	1	11	88485138	Mus musculus	mm10	CTaCTaCTCTaCCCAaaACTTCACAaAATTaCTTTCCTaaaTACAAAaCr	CAGTCCCCTGGACTGCTGCTCTGCCCAGGACTTCACAGAATTGCTTTCCTGGGTACAAAG[CG]GTTGATAGGAGGTGAATAAAGAAAACTTGCTCCCAGGGGAGGGCTGAAGCCAGGAGCAGC	CAGTCCCCTGGACTGCTGCTCTGCCCAGGACTTCACAGAATTGCTTTCCTGGGTACAAAG[CG]GTTGATAGGAGGTGAATAAAGAAAACTTGCTCCCAGGGGAGGGCTGAAGCCAGGAGCAGC	GRCm10															FALSE	Msi2	NM_054043.3	chr11	88339381	88718229	378849	-
0.627928	1.9248	9.30871	1.27052e-07	0.000302929	7.77809	cg29776409	12699222	TTTACCRTTAACTTAATAAATTACATCTAAAAACCCCTTATCCTATCATC						cg	R	B	C	II	1	11	76292264	Mus musculus	mm10	TTaCCrTTaACTTaaTaaATTACATCTAAAAACCCCTTaTCCTaTCATCr	TGGAGTTCCCTTTTGCCGTTGACTTGGTGGATTACATCTAAAAACCCCTTGTCCTGTCAT[CG]TCTCTTTCTCATTGGTGCTGGGTTTGCTGACAGCTATAGAGTGTGAGAAACGGGCCCTGC	TGGAGTTCCCTTTTGCCGTTGACTTGGTGGATTACATCTAAAAACCCCTTGTCCTGTCAT[CG]TCTCTTTCTCATTGGTGCTGGGTTTGCTGACAGCTATAGAGTGTGAGAAACGGGCCCTGC	GRCm10															FALSE	Nxn	NM_008750.5	chr11	76257225	76399141	141917	-
0.779336	0.669652	9.29735	1.29071e-07	0.000305201	7.76395	cg28808796	44770365	ACATTAAATAACTCAAATATATCATTAAAAAAACACTATCCTATTCCTAC						cg	F	T	C	II	1	10	88511501	Mus musculus	mm10	CATTaaaTaACTCAAATATaTCATTAAaaAAACACTaTCCTATTCCTACr	CCATCAGAAAACAGAGGTAATGTCAATATTGCTCAGGAGAAAAGGTACCTGTGCCGGATA[CG]TAGGAATAGGACAGTGTTTCCTTAATGACATATTTGAGTCACCCAATGCCCTAAGCACTT	CCATCAGAAAACAGAGGTAATGTCAATATTGCTCAGGAGAAAAGGTACCTGTGCCGGATA[CG]TAGGAATAGGACAGTGTTTCCTTAATGACATATTTGAGTCACCCAATGCCCTAAGCACTT	GRCm10															FALSE	.	.	.	.	.	.	.
-0.843769	-4.68421	-9.27283	1.33546e-07	0.000312233	7.73337	cg35124842	69805317	ACTTTCAACCTTATTCACTTCCACRATAAACRAATCACRTAATATTACAC						cg	F	T	C	II	1	17	65886075	Mus musculus	mm10	CTTTCAaCCTTATTCACTTCCACraTaAACrAaTCACrTaATaTTACACr	CATATGGGATAATGAGGTGGGGAAAGAGGCTTTTTTTTTTTTTTTTAACTGAGTAATTTA[CG]TGTAACATCACGTGACTCGTTCACCGTGGAAGTGAATAAGGCTGAAAGCAGAGAAGTGGG	CATATGGGATAATGAGGTGGGGAAAGAGGCTTTTTTTTTTTTTTTTAACTGAGTAATTTA[CG]TGTAACATCACGTGACTCGTTCACCGTGGAAGTGAATAAGGCTGAAAGCAGAGAAGTGGG	GRCm10													chr17:65884163-65885192		FALSE	Ralbp1	NM_001198949.1	chr17	65885123	65886423	1301	-
1.27743	-1.53184	9.26917	1.34228e-07	0.000312233	7.7288	cg43967330	42807258	ACTCTCAAAACACAAACACACAATAATATTCTTATACATACAATAAAACA	93646183	ACTCTCGAAACACAAACGCACAATAATATTCTTATACGTACAATAAAACG	T	Red	R	cg	R	B	C	I	1	6	125081850	Mus musculus	mm10	aCTCTCrAAaCACAaaCrCACAaTaATaTTCTTaTACrTaCAaTaaaACr	TTCATCGCTGAAGCTCTCGAAGCACAGGCGCACAGTGATGTTCTTGTACGTGCAGTGGGA[CG]GGCTGTGCACGCGGGCGGCGGGCACAGCGAACAGCAGGATGAGAGCCCACACGCCCAGGC	TTCATCGCTGAAGCTCTCGAAGCACAGGCGCACAGTGATGTTCTTGTACGTGCAGTGGGA[CG]GGCTGTGCACGCGGGCGGCGGGCACAGCGAACAGCAGGATGAGAGCCCACACGCCCAGGC	GRCm10			chr6:125081651-125082307	chr6	125081651	125082307	656	54	407	16.5	62	0.86			FALSE	Lpar5	NM_001163269.1	chr6	125067919	125082472	14554	+
1.01657	2.00196	9.22903	1.41952e-07	0.000327538	7.67856	cg34024155	51614187	CCTAAATCAAAAATTAAACAACCTAAAACTTAACAAACAACCCTATAAAC						cg	F	T	C	II	1	16	24621156	Mus musculus	mm10	CTAaaTCAAAaaTTaAACAACCTAAAACTTAACAAaCAaCCCTaTaAaCr	TTACATGAGGCAATGAACTTGGACTCTTTTGGGCTTCCCTAGACTAAAGGTTCAAGCAAG[CG]CTCACAGGGCTGCTTGTTAAGTTTTAGGTTGTTCAACCTTTGACCTAGGTTATCTTGTTT	TTACATGAGGCAATGAACTTGGACTCTTTTGGGCTTCCCTAGACTAAAGGTTCAAGCAAG[CG]CTCACAGGGCTGCTTGTTAAGTTTTAGGTTGTTCAACCTTTGACCTAGGTTATCTTGTTT	GRCm10															FALSE	Lpp	NM_178665.5	chr16	24393349	24992578	599230	+
-1.01281	-5.54256	-9.21004	1.45769e-07	0.000332054	7.65471	cg42554658	34791841	ACAATACAATAAAAAATCACAAACAACTCCAAATTCCTAAACAAAAAACA	69768126	ACGATACGATAAAAAATCGCGAACAACTCCGAATTCCTAAACAAAAAACG	A	Red	R	cg	F	T	C	I	1	5	107868922	Mus musculus	mm10	aCraTACraTaaAaaaTCrCraaCAaCTCCraaTTCCTaAaCAaaAaaCr	CTCCAAGCGCCTCGGCCCGGCTCGGCCTCCGCGGCCGCGTTCCCCGCGTGACCCGGCGCA[CG]CCTCCTGCTCAGGAACCCGGAGCTGCCCGCGACCCTCCACCGTACCGCCGACGACTCGGG	CTCCAAGCGCCTCGGCCCGGCTCGGCCTCCGCGGCCGCGTTCCCCGCGTGACCCGGCGCA[CG]CCTCCTGCTCAGGAACCCGGAGCTGCCCGCGACCCTCCACCGTACCGCCGACGACTCGGG	GRCm10			chr5:107868348-107869387	chr5	107868348	107869387	1039	117	682	22.5	65.6	1.05			FALSE	Evi5	NM_007964.2	chr5	107744794	107875107	130314	-
-1.55433	0.116962	-9.20778	1.4623e-07	0.000332054	7.65187	cg38377775	38675115	TAACRAAAAACCTACTCTCTTAACACTACCAAATAATAATAAACTCCAAC						cg	F	T	C	II	1	2	51731908	Mus musculus	mm10	aaCraaAaACCTaCTCTCTTAaCACTaCCAaaTaaTaaTaaaCTCCAaCr	AATAACAAGGCTTCAAAGAGAATAAGAATGCCTACCACACACTCCAGAGACATCAGACAT[CG]CTGGAGCCCACCACCACCTGGCAGTGCTAAGAGAGCAGGTCTCCCGCCACCTACCTCCAC	AATAACAAGGCTTCAAAGAGAATAAGAATGCCTACCACACACTCCAGAGACATCAGACAT[CG]CTGGAGCCCACCACCACCTGGCAGTGCTAAGAGAGCAGGTCTCCCGCCACCTACCTCCAC	GRCm10															FALSE	Gm13490	NR_040639.1	chr2	51656965	51732009	75045	-
-1.1095	-4.9836	-9.19073	1.49762e-07	0.000337396	7.63042	cg34480417	86629400	TCTCCTAAAAAACACATAATTTTTACATTATAAAAAACRCCTTAAAACCC						cg	F	T	C	II	1	16	90934098	Mus musculus	mm10	CTCCTAaaAAACACATaATTTTTACATTATAaAaAACrCCTTAAaACCCr	ATATGTCATTTAATATTGAGCCTTCTTTGAAAGCAGTTAAGTTTGATTATATATATAAAA[CG]GGTCTTAAGGCGTTCTCTATAATGTAAAAATCATGTGTTTCCTAGGAGACAGAAAACAAC	ATATGTCATTTAATATTGAGCCTTCTTTGAAAGCAGTTAAGTTTGATTATATATATAAAA[CG]GGTCTTAAGGCGTTCTCTATAATGTAAAAATCATGTGTTTCCTAGGAGACAGAAAACAAC	GRCm10		chr16:90934297-90935370													TRUE	1110004E09Rik	NM_026502.2	chr16	90925810	90934849	9040	-
0.885589	-0.55533	9.12026	1.6534e-07	0.000369581	7.54135	cg29919974	65781133	TAATAACTATAATAACCCCRTTAACACTCCATTAAACTCAATTTAATATC						cg	R	B	C	II	1	11	89804588	Mus musculus	mm10	AaTAACTATaaTaaCCCCrTTAACACTCCATTAAACTCAaTTTaATATCr	ATTGAGATATCTAGTAACTATGGTGGCCCCGTTAACACTCCATTAAACTCAGTTTGATAT[CG]ACAGGGTGCTTCTTTGCTTTCCTCTGATTAGGGTTATTTTCCAAATTATAACAGCACATC	ATTGAGATATCTAGTAACTATGGTGGCCCCGTTAACACTCCATTAAACTCAGTTTGATAT[CG]ACAGGGTGCTTCTTTGCTTTCCTCTGATTAGGGTTATTTTCCAAATTATAACAGCACATC	GRCm10															FALSE	.	.	.	.	.	.	.
0.546458	-0.989515	9.07825	1.7543e-07	0.000389095	7.48795	cg46232196	40763972	ACTCCTTCTACRACTATCAATTTTATCTCTATCCCRTAAAAATTAAATCC						cg	F	T	C	II	1	8	117339568	Mus musculus	mm10	CTCCTTCTACraCTATCAATTTTATCTCTATCCCrTaaAAATTaAaTCCr	CCGTAATAGACAGGGTTTCCCAGAGCGGAAGGACACTGTTACTTTTGCTTCGATTGGAAG[CG]GACTCAATTTCCACGGGATAGAGATAAAATTGATAGCCGTAGAAGGAGTCAACTTGATGG	CCGTAATAGACAGGGTTTCCCAGAGCGGAAGGACACTGTTACTTTTGCTTCGATTGGAAG[CG]GACTCAATTTCCACGGGATAGAGATAAAATTGATAGCCGTAGAAGGAGTCAACTTGATGG	GRCm10															TRUE	Cmip	NM_001163262.1	chr8	117257018	117461506	204489	+
-0.887342	4.18132	-9.0699	1.77512e-07	0.000390685	7.47731	cg28673837	34672854	AAAACCACCTATTACTAATTCTAACTACCATATTACAACAAAACCATACA	2787374	AAAACCACCTATTACTAATTCTAACTACCATATTACAACAAAACCATACG	T	Red	R	cg	R	B	C	I	1	10	76596646	Mus musculus	mm10	AAaaCCACCTaTTaCTaATTCTaaCTaCCATATTaCAACAaAaCCATaCr	TAGGTCAGTGGGAAGGCCACCTGTTGCTGATTCTGGCTGCCATATTGCAACAGAGCCATG[CG]GGCGTTGAGTGGGTCATCATCCCTCCGGGCCAGAGTCAGGCGCCGGGACACGTCCTCCAC	TAGGTCAGTGGGAAGGCCACCTGTTGCTGATTCTGGCTGCCATATTGCAACAGAGCCATG[CG]GGCGTTGAGTGGGTCATCATCCCTCCGGGCCAGAGTCAGGCGCCGGGACACGTCCTCCAC	GRCm10			chr10:76596334-76596785	chr10	76596334	76596785	451	37	287	16.4	63.6	0.81			FALSE	Col6a2	NM_146007.2	chr10	76595755	76623404	27650	-
0.745356	-3.71531	9.06315	1.79215e-07	0.000391422	7.4687	cg30463062	10801107	AAAACCCTTACTAATCAATTCCCACCTAAACTATAAAAATACTACAACTC						cg	R	B	C	II	1	12	24680316	Mus musculus	mm10	AaaCCCTTaCTaaTCAATTCCCACCTaaaCTaTAAaaATaCTaCAACTCr	TGGCCAAAGCAGAGGCCCTTGCTGGTCAATTCCCACCTGGGCTGTAAGGATGCTGCAACT[CG]ACTCCGTGCAGCCCCACTGGTAAAGGAATGCAAGCCCTGAGTCAGAAGAAAGTTCTAGGT	TGGCCAAAGCAGAGGCCCTTGCTGGTCAATTCCCACCTGGGCTGTAAGGATGCTGCAACT[CG]ACTCCGTGCAGCCCCACTGGTAAAGGAATGCAAGCCCTGAGTCAGAAGAAAGTTCTAGGT	GRCm10		chr12:24680629-24681116													TRUE	Cys1	NM_138686.3	chr12	24665837	24681795	15959	-
0.934149	2.2497	9.04966	1.82669e-07	0.000395943	7.45148	cg31347687	99799284	TTAATAACAATTAAAACCACACCTTTAAACACAACAAACAATTATATTCC						cg	F	T	C	II	1	13	23687390	Mus musculus	mm10	TaATAaCAATTAAAaCCACACCTTTAAACACAaCAAaCAATTaTaTTCCr	ATGCCATGGCCTTAGAGAACCAGGCAGGTTTGGGACTGGTGCTTGTTAATGTATATATAC[CG]GAACACAATTGCTTGCTGTGTTTAAAGGTGTGGCTTTAATTGCTATCAAGTTCCCTAGCG	ATGCCATGGCCTTAGAGAACCAGGCAGGTTTGGGACTGGTGCTTGTTAATGTATATATAC[CG]GAACACAATTGCTTGCTGTGTTTAAAGGTGTGGCTTTAATTGCTATCAAGTTCCCTAGCG	GRCm10														chr13:23683595-23684586	FALSE	Hist1h2bc	NM_023422.3	chr13	23684198	23692480	8283	+
0.978622	0.790842	9.03135	1.87471e-07	0.000403296	7.42805	cg29847797	41601450	TTTTCTAAACTTCACAAACAAATAACTAATCCACAAATAAAACACTACCC						cg	R	B	C	II	1	11	83020710	Mus musculus	mm10	TTTCTaaACTTCACAaaCAaaTaACTAaTCCACAAaTaaAACACTACCCr	ACCAGGGCTGCTTTTCTGGACTTCACAGGCAGGTGACTAGTCCACAAGTGGAACACTACC[CG]GCCACAGACCAGAAGGATCTTGTCAGGAGGCTGGCTTCTGGAAAGAAAGGGAGACTTACA	ACCAGGGCTGCTTTTCTGGACTTCACAGGCAGGTGACTAGTCCACAAGTGGAACACTACC[CG]GCCACAGACCAGAAGGATCTTGTCAGGAGGCTGGCTTCTGGAAAGAAAGGGAGACTTACA	GRCm10															FALSE	Slfn8	NM_001167743.1	chr11	83002157	83020722	18566	-
0.727772	0.833573	8.96294	2.06622e-07	0.000441177	7.34016	cg42210940	87734864	AATAAACAATATCRTCCTCTTACCAAAACTTCATTTATACACTAAAACAC						cg	F	T	C	II	1	5	64263552	Mus musculus	mm10	aTaaaCAaTaTCrTCCTCTTACCAaAaCTTCATTTaTaCACTaaAACACr	TGGATTCATCTGCCGAGAGTGCTCGGGTGGCGGCAGTGGCGGCTTTCATTTTGTCTGTTA[CG]TGTTCCAGTGCACAAATGAAGCTCTGGTAAGAGGACGACACTGCCCACTGCAAACCTTGT	TGGATTCATCTGCCGAGAGTGCTCGGGTGGCGGCAGTGGCGGCTTTCATTTTGTCTGTTA[CG]TGTTCCAGTGCACAAATGAAGCTCTGGTAAGAGGACGACACTGCCCACTGCAAACCTTGT	GRCm10															FALSE	Tbc1d1	NM_019636.3	chr5	64160259	64351486	191228	+
0.82987	-0.106162	8.93005	2.16552e-07	0.000454775	7.29769	cg29902853	85773882	AACATAATCCCTCAAAAATCTATACAAAAAACTTTCCACTTAAATAATCC						cg	F	T	C	II	1	11	88354888	Mus musculus	mm10	aCATAaTCCCTCAAaaATCTaTACAaAAaaCTTTCCACTTaAaTAaTCCr	AGCTATTAGTGCTTACATCAAAAATGGATTAAACTCCTGCGTCTTTACAATCATTAAAGA[CG]GACTACTCAAGTGGAAAGCCTTCTGTACAGATCCTTGAGGGACTATGCCCTCAACACCCT	AGCTATTAGTGCTTACATCAAAAATGGATTAAACTCCTGCGTCTTTACAATCATTAAAGA[CG]GACTACTCAAGTGGAAAGCCTTCTGTACAGATCCTTGAGGGACTATGCCCTCAACACCCT	GRCm10															FALSE	Msi2	NM_054043.3	chr11	88339381	88718229	378849	-
1.0223	-0.393518	8.92768	2.17286e-07	0.000454775	7.29463	cg29898920	76750826	AACRCTTAAAACCTTTAAAAATACAAAATCTTCAAAAAATTATACTCTCC						cg	F	T	C	II	1	11	88069681	Mus musculus	mm10	aCrCTTaAaACCTTTaaAAATaCAaAATCTTCAAAAaATTATACTCTCCr	AATGGGTAATTTTGAATTCTCCAATTCCCCGTATTAACTCCACCGGGATGGGACCAGATG[CG]GAGAGTATAATCTTTTGAAGATTCTGCATTTCCAAAGGTCTCAAGCGCCCAAGCTACGCG	AATGGGTAATTTTGAATTCTCCAATTCCCCGTATTAACTCCACCGGGATGGGACCAGATG[CG]GAGAGTATAATCTTTTGAAGATTCTGCATTTCCAAAGGTCTCAAGCGCCCAAGCTACGCG	GRCm10													chr11:88067845-88069300		FALSE	Vezf1	NM_016686.4	chr11	88068278	88084729	16452	+
-1.36712	-2.87692	-8.92612	2.17772e-07	0.000454775	7.2926	cg21712678	2609546	ACCTACRCCRAACCCRATAAATAATATACTATAACTAAAAATATAATTAC						cg	F	T	C	II	1	15	81745271	Mus musculus	mm10	CCTaCrCCrAaCCCrATAAATaaTATaCTATaACTAaAaaTATaATTACr	GCAGGATGCGGCCGCCCGTAATTAAATAGCATTTACTCTTATTATTACTAATAATAATAA[CG]TAATCATACCTCTAGTCATAGCATACCATTTATCGGGCTCGGCGCAGGCCCGCGGGGAGC	GCAGGATGCGGCCGCCCGTAATTAAATAGCATTTACTCTTATTATTACTAATAATAATAA[CG]TAATCATACCTCTAGTCATAGCATACCATTTATCGGGCTCGGCGCAGGCCCGCGGGGAGC	GRCm10		chr15:81745743-81746031	chr15:81745014-81745344	chr15	81745014	81745344	330	37	211	22.4	63.9	1.1			FALSE	Zc3h7b	NM_001081016.1	chr15	81744847	81796269	51423	+
0.981238	2.04833	8.92108	2.19348e-07	0.000454775	7.28608	cg29911356	97801290	CAAAAATCATAATAAAACCTCRAATAAATAAAAATAACCACCTCTACACC						cg	R	B	C	II	1	11	88982537	Mus musculus	mm10	AaaAaTCATaaTaaaaCCTCraATaaaTaaaAaTaaCCACCTCTaCACCr	TCTGCAATTGTCAGGAGTCATGGTGGGGCCTCGGATGGGTGGGAGTGGCCACCTCTGCAC[CG]CCCAAGTTCTTGGGGTAGGAAGGAGGAGTCCTAAGAGACTGAAGGGTTTTTTCTTCTGTT	TCTGCAATTGTCAGGAGTCATGGTGGGGCCTCGGATGGGTGGGAGTGGCCACCTCTGCAC[CG]CCCAAGTTCTTGGGGTAGGAAGGAGGAGTCCTAAGAGACTGAAGGGTTTTTTCTTCTGTT	GRCm10															FALSE	Coil	NM_016706.2	chr11	88973934	88991613	17680	+
0.804461	0.382697	8.90823	2.23419e-07	0.000459884	7.26942	cg41307594	74794130	AAACTTTAAAATCAAAATTAATCACCCTCACCATTCTCCCACAAATAAAC						cg	R	B	C	II	1	4	115563643	Mus musculus	mm10	AACTTTaAaATCAAaATTaaTCACCCTCACCATTCTCCCACAaaTAaaCr	TTTAACCAACTGAACTTTGAGATCAAGATTGGTCACCCTCACCATTCTCCCACAGGTAGG[CG]GGCAATCCTTACAGGATTTAGGCAGGAGGCAGAAAGGATTATTGAGAGTGAGGACCTCAA	TTTAACCAACTGAACTTTGAGATCAAGATTGGTCACCCTCACCATTCTCCCACAGGTAGG[CG]GGCAATCCTTACAGGATTTAGGCAGGAGGCAGAAAGGATTATTGAGAGTGAGGACCTCAA	GRCm10															FALSE	Cyp4a31	NM_001252539.1	chr4	115563448	115563648	201	+
0.808786	-0.11846	8.87076	2.35749e-07	0.000481797	7.22076	cg29905411	2697479	CCTAAAACAAATACAAAAAACAATTAACTCCCTCTTAACCAATAAACTTC						cg	R	B	C	II	1	11	88555052	Mus musculus	mm10	CTaaaACAaATACAAAAaaCAATTAACTCCCTCTTaACCAaTaAaCTTCr	CTTCACTGAGACCTGGGACAGATACAAAAGGCAATTAACTCCCTCTTGACCAGTGAGCTT[CG]TGCTCAGGGCCCTGGTTTCCTCCTAACACAGTGTGGGGGTGTTCCAGGCTATGCCCCCTG	CTTCACTGAGACCTGGGACAGATACAAAAGGCAATTAACTCCCTCTTGACCAGTGAGCTT[CG]TGCTCAGGGCCCTGGTTTCCTCCTAACACAGTGTGGGGGTGTTCCAGGCTATGCCCCCTG	GRCm10															FALSE	Msi2	NM_054043.3	chr11	88339381	88718229	378849	-
-1.13793	-4.38455	-8.84111	2.46015e-07	0.000499212	7.1821	cg38137330	43730315	AAATCTTCTTAAAACCCCAAAAAATAACRCCACAAATTAATCTAAACAAC						cg	F	T	C	II	1	2	23040495	Mus musculus	mm10	AaTCTTCTTAAaaCCCCAaAAaATaaCrCCACAAaTTaATCTAaACAACr	GACTTACTGACTTTCCTAAGTAAGTTCTGCCAATTTTCAATGTTCTCATAGGAAAAATTT[CG]TTGTCTAGATCAACTTGTGGCGCCATCTTCTGGGGCCTTAAGAAGACTCTCAAGATTTAA	GACTTACTGACTTTCCTAAGTAAGTTCTGCCAATTTTCAATGTTCTCATAGGAAAAATTT[CG]TTGTCTAGATCAACTTGTGGCGCCATCTTCTGGGGCCTTAAGAAGACTCTCAAGATTTAA	GRCm10													chr2:23039494-23040179		FALSE	Abi1	NM_001077190.2	chr2	23040441	23041741	1301	-
0.631405	-1.2158	8.82788	2.50747e-07	0.000505231	7.16482	cg29913519	60647427	CAAACACAAAAACCCCTTAAAAATCCACTTTAACTCTTTAATCACAAAAC						cg	F	T	C	II	1	11	89143250	Mus musculus	mm10	AaACACAAaAaCCCCTTaAAaATCCACTTTaACTCTTTAaTCACAAaACr	CCTTCCTAGTTGACGGGACTAGGCAGAGGGGCGGGGCACGCTCTGTGCAGTGGATTCCAT[CG]TCTTGTGACTAAAGAGTCAAAGTGGATCTTCAAGGGGCTCTTGTGTCTGACTGCTCATAC	CCTTCCTAGTTGACGGGACTAGGCAGAGGGGCGGGGCACGCTCTGTGCAGTGGATTCCAT[CG]TCTTGTGACTAAAGAGTCAAAGTGGATCTTCAAGGGGCTCTTGTGTCTGACTGCTCATAC	GRCm10															FALSE	.	.	.	.	.	.	.
0.933811	0.844172	8.8117	2.56668e-07	0.000513543	7.14364	cg35204719	92771510	TACTAAAATTCTAAATTCTACRTATCCCTTCTTACATATATCTTATTATC						cg	R	B	C	II	1	17	74078976	Mus musculus	mm10	aCTaaAaTTCTAAATTCTaCrTATCCCTTCTTaCATaTaTCTTaTTaTCr	CCAAACTGGAATGCTGGAGTTCTAAATTCTGCGTATCCCTTCTTGCATGTGTCTTGTTGT[CG]ACTTGCGCCATCTTTCCCTGTGTTTCAGGCCTCACAAGATTAAAACTTGGTAAGAAAGTA	CCAAACTGGAATGCTGGAGTTCTAAATTCTGCGTATCCCTTCTTGCATGTGTCTTGTTGT[CG]ACTTGCGCCATCTTTCCCTGTGTTTCAGGCCTCACAAGATTAAAACTTGGTAAGAAAGTA	GRCm10															FALSE	.	.	.	.	.	.	.
0.704338	-1.82496	8.80518	2.59093e-07	0.000514796	7.1351	cg29762822	85774184	AAAAAACTACCACTTCAAAAACATCRCTTCTAAACACRAAACCTAACATC						cg	R	B	C	II	1	11	75213845	Mus musculus	mm10	aaaaaCTaCCACTTCAaaAaCATCrCTTCTaaaCACraaaCCTaaCATCr	GCCTGGGGGTAGGGGGGCTGCCACTTCAGGAGCATCGCTTCTGGGCACGGGGCCTGGCAT[CG]CCCTCGCCCTTTGCCCGGCCCGGCAGCTACAGATCGATGCGACAGCCCTCCCTGCCCCTC	GCCTGGGGGTAGGGGGGCTGCCACTTCAGGAGCATCGCTTCTGGGCACGGGGCCTGGCAT[CG]CCCTCGCCCTTTGCCCGGCCCGGCAGCTACAGATCGATGCGACAGCCCTCCCTGCCCCTC	GRCm10			chr11:75213819-75214066	chr11	75213819	75214066	247	20	166	16.2	67.2	0.73			FALSE	Rtn4rl1	NM_177708.5	chr11	75193992	75267762	73771	+
1.11313	-1.39827	8.79397	2.63323e-07	0.000517447	7.1204	cg43967331	96643114	TTCATCACTAAAACTCTCAAAACACAAACACACAATAATATTCTTATACA	16686389	TTCATCGCTAAAACTCTCGAAACACAAACGCACAATAATATTCTTATACG	A	Red	R	cg	R	B	C	I	1	6	125081862	Mus musculus	mm10	TTCATCrCTaAAaCTCTCrAAaCACAaaCrCACAaTaATaTTCTTaTACr	GCCCTTCCACAGTTCATCGCTGAAGCTCTCGAAGCACAGGCGCACAGTGATGTTCTTGTA[CG]TGCAGTGGGACGGGCTGTGCACGCGGGCGGCGGGCACAGCGAACAGCAGGATGAGAGCCC	GCCCTTCCACAGTTCATCGCTGAAGCTCTCGAAGCACAGGCGCACAGTGATGTTCTTGTA[CG]TGCAGTGGGACGGGCTGTGCACGCGGGCGGCGGGCACAGCGAACAGCAGGATGAGAGCCC	GRCm10			chr6:125081651-125082307	chr6	125081651	125082307	656	54	407	16.5	62	0.86			FALSE	Lpar5	NM_001163269.1	chr6	125067919	125082472	14554	+
0.956079	1.10587	8.79207	2.64044e-07	0.000517447	7.11792	cg31910355	51635933	ACCAAATTCTTACCRAACATCRCATCCTCATACAATAATCTTATATCTTC						cg	R	B	C	II	1	13	93637919	Mus musculus	mm10	CCAAaTTCTTaCCraaCATCrCATCCTCATaCAATaATCTTaTATCTTCr	TTACACTCTGTGCCAAGTTCTTGCCGGGCATCGCATCCTCATGCAATGATCTTGTATCTT[CG]CCTTTGTCAAATATTTGGTCACTGAGTGGAATTCTTGGGGGTATGGTCTGGCAGCTTAAG	TTACACTCTGTGCCAAGTTCTTGCCGGGCATCGCATCCTCATGCAATGATCTTGTATCTT[CG]CCTTTGTCAAATATTTGGTCACTGAGTGGAATTCTTGGGGGTATGGTCTGGCAGCTTAAG	GRCm10															FALSE	Bhmt	NM_016668.3	chr13	93637758	93637958	201	-
0.809152	1.45647	8.76578	2.7428e-07	0.000533849	7.08336	cg42214406	55758306	AAAACTACAAAACAAAAACCTTCTTATTCATAAAAACRCTACAATAATCC						cg	F	T	C	II	1	5	64603148	Mus musculus	mm10	aAACTaCAAAaCAAaAaCCTTCTTaTTCATaAAaACrCTACAaTaATCCr	TGACTCATCTCTAGCTCCGCTGTATCTGGTCTCTGTCTTTCATGCCCTCCTTGCACGGTA[CG]GATCACTGTAGCGTCTTCATGAACAAGAAGGCTCTTGCTTTGCAGTTCTCAGCTCCCAGT	TGACTCATCTCTAGCTCCGCTGTATCTGGTCTCTGTCTTTCATGCCCTCCTTGCACGGTA[CG]GATCACTGTAGCGTCTTCATGAACAAGAAGGCTCTTGCTTTGCAGTTCTCAGCTCCCAGT	GRCm10															FALSE	Gm3716	NR_045078.1	chr5	64593862	64610699	16838	-
0.560711	0.00813668	8.74145	2.84123e-07	0.000549272	7.05131	cg43090353	21711575	AACAAATAAAACCCTTTACAATATACTAACTTACCAAACCACTATCTTCC						cg	R	B	C	II	1	6	3988921	Mus musculus	mm10	ACAaaTaAAaCCCTTTaCAaTaTaCTaACTTaCCAaACCACTaTCTTCCr	AGTGTCCCTGTAACAGGTGAAGCCCTTTGCAGTGTGCTGACTTGCCAGACCACTGTCTTC[CG]CCAATCAAATGGCTAACAGTGTTATCAGACAAGCATCTGAACCATGTCCTAGAGAATTTT	AGTGTCCCTGTAACAGGTGAAGCCCTTTGCAGTGTGCTGACTTGCCAGACCACTGTCTTC[CG]CCAATCAAATGGCTAACAGTGTTATCAGACAAGCATCTGAACCATGTCCTAGAGAATTTT	GRCm10															FALSE	.	.	.	.	.	.	.
0.809856	-0.418974	8.73615	2.86318e-07	0.0005498	7.04432	cg29982701	86624952	ATCTAAATCTCAAAATTCAAATAAAAATTATCTTTCCCAAATAACATCTC						cg	R	B	C	II	1	11	96596192	Mus musculus	mm10	TCTaAaTCTCAaAaTTCAAATAaAaaTTATCTTTCCCAaaTAaCATCTCr	ATAGCAGAGCGATCTGAGTCTCAGAGTTCAAATAGAGGTTATCTTTCCCAGGTAGCATCT[CG]TCCAACGAGAATTTGATTTTTTTCTATAGGACTTTACTCCATTAGATTAATGAAATTTCA	ATAGCAGAGCGATCTGAGTCTCAGAGTTCAAATAGAGGTTATCTTTCCCAGGTAGCATCT[CG]TCCAACGAGAATTTGATTTTTTTCTATAGGACTTTACTCCATTAGATTAATGAAATTTCA	GRCm10															FALSE	Skap1	NM_001177898.1	chr11	96464590	96759622	295033	+
0.625224	0.685999	8.72503	2.90979e-07	0.000553416	7.02963	cg31489464	48640159	CAACTAAAACACCCAAAACTCAAAATAAACRCAAAACRAATACCACTATC						cg	R	B	C	II	1	13	41828314	Mus musculus	mm10	AaCTaaaACACCCAaaACTCAaAaTaAACrCAaAaCraaTaCCACTaTCr	TGAACAGAGGGCAGCTGGGACACCCAGGACTCAGAGTGAACGCAGAGCGGGTGCCACTGT[CG]CTCCGATCCAGGGAAGCCATGACGAAAACAACCACTTGCGTGTACCACTTCCTTGTTCTG	TGAACAGAGGGCAGCTGGGACACCCAGGACTCAGAGTGAACGCAGAGCGGGTGCCACTGT[CG]CTCCGATCCAGGGAAGCCATGACGAAAACAACCACTTGCGTGTACCACTTCCTTGTTCTG	GRCm10															FALSE	Adtrp	NM_175417.4	chr13	41763147	41847488	84342	-
0.801835	-5.07021	8.72181	2.9234e-07	0.000553416	7.02538	cg30678265	44701551	TAACTAAAATCRAAATACAACCACTACCTATATAAATAAACCAAAACTAC						cg	R	B	C	II	1	12	56612892	Mus musculus	mm10	aaCTaaAaTCraAaTaCAaCCACTACCTaTaTaAaTaAaCCAaaACTaCr	AGACTGCTGCCTGGCTGGAGTCGGAGTGCAGCCACTACCTGTGTGAGTGAGCCAGGACTG[CG]GCCGGGGGTGGGGAGTGCGGAGGAGGGACCCAGCCAAGCCTCTGGGGTCAGGGATGGAGA	AGACTGCTGCCTGGCTGGAGTCGGAGTGCAGCCACTACCTGTGTGAGTGAGCCAGGACTG[CG]GCCGGGGGTGGGGAGTGCGGAGGAGGGACCCAGCCAAGCCTCTGGGGTCAGGGATGGAGA	GRCm10		chr12:56612959-56613189											chr12:56611782-56612308		FALSE	Nkx2-9	NM_008701.2	chr12	56611392	56613284	1893	-
0.631623	1.30349	8.71791	2.94004e-07	0.000553416	7.02022	cg29905400	67777297	TTATAAACTAAACAAATAATCCTTAATACTAATCTCCTCAAAATCAAAAC						cg	F	T	C	II	1	11	88554250	Mus musculus	mm10	TATaaACTaaACAAaTaATCCTTAATaCTaATCTCCTCAAAATCAaaaCr	AAAATGGCTATGATGCCTTCCGGGTCAAAAATGGTCAACAGTAATTCAAGGTCAAAATAA[CG]CCCTGATTTTGAGGAGATCAGCATTAAGGATCACTTGTCCAGTCCATAATGCCTCAGCCA	AAAATGGCTATGATGCCTTCCGGGTCAAAAATGGTCAACAGTAATTCAAGGTCAAAATAA[CG]CCCTGATTTTGAGGAGATCAGCATTAAGGATCACTTGTCCAGTCCATAATGCCTCAGCCA	GRCm10															FALSE	Msi2	NM_054043.3	chr11	88339381	88718229	378849	-
0.575574	0.502664	8.71229	2.96414e-07	0.000554307	7.01279	cg33244891	6739361	AAAACTCTAATATACTAACAAAAACCTAATTTCAAAAATACACTTTATAC						cg	R	B	C	II	1	15	36983386	Mus musculus	mm10	aAaCTCTAaTaTaCTAaCAaaAaCCTaaTTTCAaaaATACACTTTaTACr	CCCTCCAGACCAGAGCTCTAGTGTGCTAGCAGGAGCCTGGTTTCAGGGATACACTTTGTA[CG]TCCACTTCTGTTGGTAACCGTGGAAACGTCTCCTGTTTCCCACTCTGCTCACCCTTCTTC	CCCTCCAGACCAGAGCTCTAGTGTGCTAGCAGGAGCCTGGTTTCAGGGATACACTTTGTA[CG]TCCACTTCTGTTGGTAACCGTGGAAACGTCTCCTGTTTCCCACTCTGCTCACCCTTCTTC	GRCm10															FALSE	.	.	.	.	.	.	.
-0.961618	-2.17409	-8.70455	2.99773e-07	0.000556947	7.00254	cg29943086	38784247	TTACATCTTCTACTAATAACACACCAAACTAAATCTATATACAAAAAAAC						cg	F	T	C	II	1	11	93490364	Mus musculus	mm10	TACATCTTCTaCTaATaACACACCAaaCTAAATCTaTaTaCAaAAaaACr	ATGATATATGTGACTTATGACTCATCAGAAGTACCTTAGAAGGCAGGCATGGAAGGAAAA[CG]TCCTTCTGCACACAGATTTAGCCTGGTGTGTCATCAGCAGAAGATGTAAATGGGTCAGCC	ATGATATATGTGACTTATGACTCATCAGAAGTACCTTAGAAGGCAGGCATGGAAGGAAAA[CG]TCCTTCTGCACACAGATTTAGCCTGGTGTGTCATCAGCAGAAGATGTAAATGGGTCAGCC	GRCm10															FALSE	Car10	NM_028296.3	chr11	93099289	93601751	502463	+
1.07215	2.05606	8.67286	3.13934e-07	0.000576991	6.96052	cg41147651	48735388	AAAAAACCTATATCAAAAAATCTCATTTCACTATTCTAACCTTTAAACTC						cg	F	T	C	II	1	4	94650157	Mus musculus	mm10	AAAAaCCTaTaTCAaAAaaTCTCATTTCACTaTTCTAACCTTTaAACTCr	AATTAAGTTCTAGTCAATCTTTTGCTAAGGAAGTCCAGCTTGCCTTTAATCACTTGTTTA[CG]AGTTCAAAGGTTAGAACAGTGAAATGAGACCTTCTGACACAGGCTTTTCTAATGGTGTAG	AATTAAGTTCTAGTCAATCTTTTGCTAAGGAAGTCCAGCTTGCCTTTAATCACTTGTTTA[CG]AGTTCAAAGGTTAGAACAGTGAAATGAGACCTTCTGACACAGGCTTTTCTAATGGTGTAG	GRCm10															FALSE	Ift74	NM_001290568.1	chr4	94614490	94664698	50209	+
0.832617	-1.80188	8.67142	3.14595e-07	0.000576991	6.9586	cg40893372	37657488	TCRCTTAATTTTTAAACTAAACTAACTACCTCTCAAAACTATTAAACTTC						cg	R	B	C	II	1	4	53246524	Mus musculus	mm10	CrCTTAATTTTTAAACTAAaCTAACTaCCTCTCAAAACTaTTaAaCTTCr	ATCAGCCGACTTCGCTTAATTTTTAAACTAAGCTAACTGCCTCTCAAAACTGTTGAGCTT[CG]GTTGGTAGAGAGCCAGGGTTTCAGAGGCTGTAAGCACATGATCTTTCCAGGAACTAGCTA	ATCAGCCGACTTCGCTTAATTTTTAAACTAAGCTAACTGCCTCTCAAAACTGTTGAGCTT[CG]GTTGGTAGAGAGCCAGGGTTTCAGAGGCTGTAAGCACATGATCTTTCCAGGAACTAGCTA	GRCm10															FALSE	4930522O17Rik	NR_040665.1	chr4	53246195	53251120	4926	+
0.64761	0.996044	8.64031	3.29221e-07	0.000593266	6.9172	cg37194741	68640970	TACATATTTACCAAATACCAAACCTAAAAATTCAAATTCAATCACTAAAC						cg	F	T	C	II	1	1	88207055	Mus musculus	mm10	aCATaTTTACCAAaTaCCAaaCCTAaAaaTTCAAaTTCAaTCACTaaaCr	AGGGTACTAGGTCTAATCAGAAATTCTAGTATGCCAGAACAGTCATTTGAGTTTATGTCA[CG]CCCAGTGACTGAACTTGAACCTCTAGGCCTGGCACTTGGTAAACATGCAATAAACAGTAA	AGGGTACTAGGTCTAATCAGAAATTCTAGTATGCCAGAACAGTCATTTGAGTTTATGTCA[CG]CCCAGTGACTGAACTTGAACCTCTAGGCCTGGCACTTGGTAAACATGCAATAAACAGTAA	GRCm10													chr1:88205329-88205799		FALSE	Ugt1a10	NM_201641.2	chr1	88055410	88220002	164593	+
0.624297	-0.0477181	8.63945	3.29637e-07	0.000593266	6.91605	cg28604751	78725883	TACAAATACRACRAATACTAAAAACAACCCTCCTTATCAACAAAAATATC						cg	R	B	C	II	1	10	69219273	Mus musculus	mm10	ACAaATACraCraaTACTAaaAaCAACCCTCCTTATCAaCAAAaATaTCr	TGCCAACGGTGTACAGATACGGCGGGTACTAGGAGCAACCCTCCTTATCAGCAAAGATGT[CG]ACACAGAGTGTTCTTTTTTCTCCTCATCAGAACATAACTCTCAGAGCTCTGATCCCATCC	TGCCAACGGTGTACAGATACGGCGGGTACTAGGAGCAACCCTCCTTATCAGCAAAGATGT[CG]ACACAGAGTGTTCTTTTTTCTCCTCATCAGAACATAACTCTCAGAGCTCTGATCCCATCC	GRCm10															FALSE	Rhobtb1	NM_001252636.1	chr10	69208551	69291791	83241	+
0.644481	-1.39605	8.63934	3.29689e-07	0.000593266	6.9159	cg30001794	90699188	TAATTTACTACRATCCCCRATAATAACATACAACCTACTAAAACTAAAAC						cg	F	T	C	II	1	11	97802134	Mus musculus	mm10	aATTTACTaCraTCCCCrATaATaaCATaCAaCCTaCTaAAaCTaaAaCr	TAATGCCTTTGAGAGATAAGGCTCAAGGAGGAGAAAAGACTGAGCATTAAGAACAGCTTA[CG]CTCCAGCTTCAGCAGGCTGCATGCCATCATCGGGGACCGCAGTAAATCAAGCCAGTCTAA	TAATGCCTTTGAGAGATAAGGCTCAAGGAGGAGAAAAGACTGAGCATTAAGAACAGCTTA[CG]CTCCAGCTTCAGCAGGCTGCATGCCATCATCGGGGACCGCAGTAAATCAAGCCAGTCTAA	GRCm10													chr11:97799345-97800236		FALSE	Lasp1	NM_010688.4	chr11	97799671	97838764	39094	+
0.60931	0.125309	8.62813	3.3514e-07	0.000599305	6.90096	cg33243028	47724383	TAAACTTTACACTTTATCCTATTCAATCACCRTAAATATACCCAAACAAC						cg	F	T	C	II	1	15	36811357	Mus musculus	mm10	aaACTTTaCACTTTaTCCTaTTCAaTCACCrTaaATaTaCCCAAaCAaCr	ACTTAAGCTTCGGAATGTGAACCTGGACCTGGGTGGGGCGGTCAAGCTGTAACAGTCACA[CG]CTGCTTGGGCACATCCACGGTGACTGAACAGGACAAAGTGCAAAGTCCAGCCATCCTCTC	ACTTAAGCTTCGGAATGTGAACCTGGACCTGGGTGGGGCGGTCAAGCTGTAACAGTCACA[CG]CTGCTTGGGCACATCCACGGTGACTGAACAGGACAAAGTGCAAAGTCCAGCCATCCTCTC	GRCm10															FALSE	.	.	.	.	.	.	.
1.20804	0.95681	8.61205	3.43127e-07	0.000609777	6.87948	cg28464543	8800448	AAATAACTCCAATAACAAACAATATATTTCAATAAAACTCACTAAAATTC						cg	R	B	C	II	1	10	52388796	Mus musculus	mm10	AATaaCTCCAaTaaCAaaCAaTATATTTCAATAAAaCTCACTaAAATTCr	ACCAGCAGTAGGAATGGCTCCAGTGGCAGGCAGTATATTTCAATAAAGCTCACTGAAATT[CG]TTCCTAGAGACGAGATGAGCCTGACATTGGTAGAGTTCTCATTGGCAACAGTGGTTTGAG	ACCAGCAGTAGGAATGGCTCCAGTGGCAGGCAGTATATTTCAATAAAGCTCACTGAAATT[CG]TTCCTAGAGACGAGATGAGCCTGACATTGGTAGAGTTCTCATTGGCAACAGTGGTTTGAG	GRCm10															FALSE	.	.	.	.	.	.	.
-1.00531	1.5806	-8.60301	3.47706e-07	0.0006141	6.86739	cg29912554	76804417	CCTAACTTTCTTTACTTACTATTAACATTTTCTTTTCCCTCTTTATTCCA	6762158	CCTAACTTTCTTTACTTACTATTAACATTTTCTTTTCCCTCTTTATTCCG	A	Red	R	cg	F	T	C	I	1	11	89066427	Mus musculus	mm10	CCTaaCTTTCTTTACTTACTaTTAACATTTTCTTTTCCCTCTTTaTTCCr	GCGGCCTTCAAGACGTCCTCCCAGAGGCAGGTGGGCAAATGATCTGGAAGAAAGACAAAA[CG]GAACAAAGAGGGAAAAGAAAATGTTAACAGTAAGTAAAGAAAGCCAGGTATAGTCAGAGT	GCGGCCTTCAAGACGTCCTCCCAGAGGCAGGTGGGCAAATGATCTGGAAGAAAGACAAAA[CG]GAACAAAGAGGGAAAAGAAAATGTTAACAGTAAGTAAAGAAAGCCAGGTATAGTCAGAGT	GRCm10															FALSE	Dgkeos	NR_110336.1	chr11	89060750	89067884	7135	+
-1.17641	-5.10672	-8.59151	3.53625e-07	0.000620722	6.85199	cg35276982	5793345	AAACAAACACAAAAATAACTCCAAACCTTATAAACAACAAAAACAAAACA	60775908	AAACGAACGCGAAAATAACTCCGAACCTTATAAACGACGAAAACAAAACG	T	Red	R	cg	F	T	C	I	1	17	83215271	Mus musculus	mm10	aaaCraaCrCraaaaTaaCTCCraaCCTTATAAaCraCraaaaCAaaaCr	GGGCAGCCCCGACCCCGGCCCCCGGCGGGCGGCACATCGGCCTGACACTTGCCTCCCTCC[CG]CCCTGCCCCCGCCGCTTATAAGGCCCGGAGCCACCCCCGCGCCCGCCCCTCCGCCAGCGC	GGGCAGCCCCGACCCCGGCCCCCGGCGGGCGGCACATCGGCCTGACACTTGCCTCCCTCC[CG]CCCTGCCCCCGCCGCTTATAAGGCCCGGAGCCACCCCCGCGCCCGCCCCTCCGCCAGCGC	GRCm10		chr17:83215491-83215722											chr17:83214696-83215048		FALSE	Pkdcc	NM_134117.2	chr17	83215082	83215282	201	+
0.556174	-1.00093	8.57016	3.64896e-07	0.000636601	6.82335	cg33967523	8716966	TAAAAATTAACCCTAACTACRCTACCATCACCCAACAAATACTAAACTTC						cg	R	B	C	II	1	16	18411144	Mus musculus	mm10	aaAaATTAACCCTaACTACrCTaCCATCACCCAaCAAATaCTaaACTTCr	GCTTCTCACCATGGAGATTAACCCTGACTACGCTGCCATCACCCAGCAAATGCTGGACTT[CG]CAGGCCTACAGGACAAAGTAGGGCCCAGTGTGGCAGCTGAGGGGTGAAGAGGGGGAGAGC	GCTTCTCACCATGGAGATTAACCCTGACTACGCTGCCATCACCCAGCAAATGCTGGACTT[CG]CAGGCCTACAGGACAAAGTAGGGCCCAGTGTGGCAGCTGAGGGGTGAAGAGGGGGAGAGC	GRCm10															FALSE	Comt	NM_001111063.1	chr16	18406881	18413494	6614	-
0.980207	0.975447	8.54517	3.78571e-07	0.000651111	6.78975	cg39809877	26604100	AAACAATTTCCCATACTACCTTCCAAAACTCTTCAATAACATCTAAAAAC						cg	F	T	C	II	1	3	60031868	Mus musculus	mm10	aaCAaTTTCCCATACTACCTTCCAAaaCTCTTCAATAaCATCTaaAAaCr	TGGGGAAAACCATTTCTCTTCTCATCTCTGTGGTGCTTGTAGCTTATTATCTTTATATAC[CG]CTTCCAGATGCTATTGAAGAGCCTTGGAAGGTAGTATGGGAAACTGCCTTTGTAAAGATA	TGGGGAAAACCATTTCTCTTCTCATCTCTGTGGTGCTTGTAGCTTATTATCTTTATATAC[CG]CTTCCAGATGCTATTGAAGAGCCTTGGAAGGTAGTATGGGAAACTGCCTTTGTAAAGATA	GRCm10															FALSE	Aadac	NM_023383.1	chr3	60031787	60040157	8371	+
0.595911	0.154458	8.53671	3.83317e-07	0.000651111	6.77837	cg33206280	34807367	ACAACACTTCACRACCAACTTATATAACTAAACAAAAATCCTACAATAAC						cg	F	T	C	II	1	15	31565415	Mus musculus	mm10	CAACACTTCACraCCAaCTTaTATAACTAAaCAaAAATCCTaCAATaaCr	AAGGCAGCAGAGCTTCTCATCCAAGGATCCTGATGAACCTCAGAAACGGAGCATGTGCAT[CG]CCATTGCAGGATTTCTGCTTAGTTATACAAGCTGGCCGTGAAGTGTTGCTAAGTAACCAC	AAGGCAGCAGAGCTTCTCATCCAAGGATCCTGATGAACCTCAGAAACGGAGCATGTGCAT[CG]CCATTGCAGGATTTCTGCTTAGTTATACAAGCTGGCCGTGAAGTGTTGCTAAGTAACCAC	GRCm10															FALSE	.	.	.	.	.	.	.
0.921636	1.43032	8.53481	3.84395e-07	0.000651111	6.77581	cg37770484	30723579	AAACCAACTAAACAAAATCCAAACTCTATATCTCCAAAACTAATATTAAC						cg	R	B	C	II	1	1	170981567	Mus musculus	mm10	AACCAaCTAaaCAAAaTCCAAACTCTaTATCTCCAAaaCTaATaTTAACr	AGCAAGACAGGAAACCAGCTAGGCAAAGTCCAAACTCTGTATCTCCAAGGCTGATGTTAA[CG]CATTCTTCAGATCTCCAACTCCTTTTTCATCTTTGTTGACTACAACAAACTTCTTTCTCT	AGCAAGACAGGAAACCAGCTAGGCAAAGTCCAAACTCTGTATCTCCAAGGCTGATGTTAA[CG]CATTCTTCAGATCTCCAACTCCTTTTTCATCTTTGTTGACTACAACAAACTTCTTTCTCT	GRCm10															FALSE	.	.	.	.	.	.	.
0.799738	0.438298	8.53242	3.85751e-07	0.000651111	6.77259	cg41307593	70788246	ATTTTTTTCCAACTACCAATACCTACCTATATCTACTTTCCTCTCTATAC						cg	F	T	C	II	1	4	115563490	Mus musculus	mm10	TTTTTTTCCAaCTaCCAaTaCCTACCTaTaTCTACTTTCCTCTCTaTaCr	GTTTAGACAGCAAATACAATGAAAAGAAAGTAAAAGGGAAACAAGTCACTGTTCTTGACT[CG]CACAGAGAGGAAAGTAGACACAGGTAGGCACTGGCAGCTGGAAAAAAATGTTGTCTCTGA	GTTTAGACAGCAAATACAATGAAAAGAAAGTAAAAGGGAAACAAGTCACTGTTCTTGACT[CG]CACAGAGAGGAAAGTAGACACAGGTAGGCACTGGCAGCTGGAAAAAAATGTTGTCTCTGA	GRCm10															FALSE	Cyp4a31	NM_001252539.1	chr4	115563448	115563648	201	+
0.524566	0.466144	8.52981	3.87241e-07	0.000651111	6.76906	cg44542973	74632110	TCAATAAATCTACTAATTCTAAAAAACCTATAAACAATTCTAAAAACCCC						cg	F	T	C	II	1	7	46997784	Mus musculus	mm10	CAaTaaATCTaCTaaTTCTaaaAaACCTaTaaaCAaTTCTaaAaaCCCCr	CAGGAGAGCTAAGACTGTTCATTGGTCGTCGAAGGTCATGTGGATTGTTTACAGGCTGCC[CG]GGGCCTCCAGAACTGCCCACAGGTCTCCCAGAACCAGCAGATCCACTGATGGGTCGCCCA	CAGGAGAGCTAAGACTGTTCATTGGTCGTCGAAGGTCATGTGGATTGTTTACAGGCTGCC[CG]GGGCCTCCAGAACTGCCCACAGGTCTCCCAGAACCAGCAGATCCACTGATGGGTCGCCCA	GRCm10															FALSE	Spty2d1	NM_175318.4	chr7	46990395	47008414	18020	-
0.566185	-1.57935	8.52669	3.89029e-07	0.000651111	6.76485	cg29748676	36642526	CTATAAACTTCAATACCATTCCTTAACCAATAAATAACTAAAAACACTCC						cg	R	B	C	II	1	11	73324412	Mus musculus	mm10	TaTaAACTTCAaTaCCATTCCTTAaCCAaTaAaTAACTAaAAACACTCCr	CCAGCCCTGCTCTGTGAACTTCAGTGCCATTCCTTAGCCAGTGAGTAACTAGAAACACTC[CG]GTCAGTTCATTTCCATGAGTCCCTCCAAAGATGGCAATCTTCTTAATAGGTTCTTTAGCA	CCAGCCCTGCTCTGTGAACTTCAGTGCCATTCCTTAGCCAGTGAGTAACTAGAAACACTC[CG]GTCAGTTCATTTCCATGAGTCCCTCCAAAGATGGCAATCTTCTTAATAGGTTCTTTAGCA	GRCm10															FALSE	Aspa	NM_023113.5	chr11	73304987	73324637	19651	-
-0.856902	2.61403	-8.52649	3.89143e-07	0.000651111	6.76459	cg36605223	89782980	CAACCAAATAACCATAACRTACACCAATATCAAACTCATCTTAAAAAAAC						cg	F	T	C	II	1	1	3531911	Mus musculus	mm10	AaCCAaaTaACCATaACrTaCACCAaTaTCAaaCTCATCTTaaaaAAaCr	GTTCAATCTGCTGGTGTCCATCTGCATCGTGTTCCTCAACAAATGGATCTATGTACACCA[CG]CTTCCCCAAGATGAGCCTGACACTGGTGCACGTCATGGTCACCTGGCTGGGCTTGTACAT	GTTCAATCTGCTGGTGTCCATCTGCATCGTGTTCCTCAACAAATGGATCTATGTACACCA[CG]CTTCCCCAAGATGAGCCTGACACTGGTGCACGTCATGGTCACCTGGCTGGGCTTGTACAT	GRCm10													chr1:3531624-3531843		FALSE	Xkr4	NM_001011874.1	chr1	3214481	3671498	457018	-
1.09998	1.77855	8.52179	3.91852e-07	0.000651833	6.75825	cg44261898	90765119	CAACATTAATATTTATCTTCCTTCAAAATCTTTACTCATCATCACTTCTC						cg	R	B	C	II	1	7	16369891	Mus musculus	mm10	AaCATTAaTaTTTATCTTCCTTCAaAATCTTTaCTCATCATCACTTCTCr	AGTCTAGGTTTCAGCATTAGTGTTTATCTTCCTTCAGAATCTTTGCTCATCATCACTTCT[CG]GTCTTTTGGCCAAGAGCAGAATCTTTGCTCTTGTGTTCTGGAAATTTAAGTTGCTGATTA	AGTCTAGGTTTCAGCATTAGTGTTTATCTTCCTTCAGAATCTTTGCTCATCATCACTTCT[CG]GTCTTTTGGCCAAGAGCAGAATCTTTGCTCTTGTGTTCTGGAAATTTAAGTTGCTGATTA	GRCm10															FALSE	Sae1	NM_001285891.1	chr7	16320235	16387896	67662	-
0.685189	-0.0203516	8.50586	4.01182e-07	0.000663495	6.73674	cg38332176	81689953	TCCTAACTCTTCTCATTTTCTCTCATTATCATTAACACAAATAAAACACC						cg	F	T	C	II	1	2	44335595	Mus musculus	mm10	CCTaaCTCTTCTCATTTTCTCTCATTaTCATTAACACAaaTAAAACACCr	GCTTTGCTCTCTCCACAGACCAGCATGCTTTGCTCTCGCCACAGAGATTCTATTGTACCT[CG]GTGTTTTACCTGTGTTAATGACAATGAGAGAAAATGAGAAGAGCCAGGACTTAATCATTG	GCTTTGCTCTCTCCACAGACCAGCATGCTTTGCTCTCGCCACAGAGATTCTATTGTACCT[CG]GTGTTTTACCTGTGTTAATGACAATGAGAGAAAATGAGAAGAGCCAGGACTTAATCATTG	GRCm10															FALSE	Arhgap15	NM_153820.3	chr2	43748823	44387623	638801	+
0.588308	-0.282542	8.48519	4.1364e-07	0.000680167	6.70877	cg29906111	82710491	AAAAAACTTTAAAACAAAAACCACACRCTTTACTCATATTCCACAACCCC						cg	F	T	C	II	1	11	88608023	Mus musculus	mm10	AAaAaCTTTaAAaCAAaaaCCACACrCTTTaCTCATaTTCCACAaCCCCr	TGAGAGTGTGCATAAAGAAGCTTTTAACCCACGATGGGTGGCCAGGAAGGACTGAGAAGA[CG]GGGCTGTGGAACATGAGCAAAGCGTGTGGCCCTTGCTTCAAAGCTCTTTGATTTGGCTGG	TGAGAGTGTGCATAAAGAAGCTTTTAACCCACGATGGGTGGCCAGGAAGGACTGAGAAGA[CG]GGGCTGTGGAACATGAGCAAAGCGTGTGGCCCTTGCTTCAAAGCTCTTTGATTTGGCTGG	GRCm10															FALSE	Msi2	NM_054043.3	chr11	88339381	88718229	378849	-
0.906106	-0.891952	8.47364	4.20778e-07	0.000687951	6.69312	cg35050429	79636497	AATAAACCTACTAATAACATCCTCAATAACAACATTCATAATAAATACCA	69707335	GATAAACCTACTAATAACGTCCTCGATAACAACGTTCGTAATAAATACCG	A	Red	R	cg	F	T	C	I	1	17	56124822	Mus musculus	mm10	raTaAACCTaCTAaTaACrTCCTCraTaaCAaCrTTCrTaaTaaaTaCCr	GGGCCAGCTCCCGCCGCTCGCGGAGACCCACGAACCAGCCTACACTGAAGCCGGACACCA[CG]GCACCCACCACGAACGCTGCCACCGAGGACGTCACTAGCAGGTTCACCGACACCAGCCCT	GGGCCAGCTCCCGCCGCTCGCGGAGACCCACGAACCAGCCTACACTGAAGCCGGACACCA[CG]GCACCCACCACGAACGCTGCCACCGAGGACGTCACTAGCAGGTTCACCGACACCAGCCCT	GRCm10			chr17:56123812-56124909	chr17	56123812	56124909	1097	110	794	20.1	72.4	0.77			FALSE	Sema6b	NM_013662.2	chr17	56123084	56133852	10769	-
0.656751	0.33654	8.4214	4.54722e-07	0.000738092	6.62209	cg44930580	69780318	AACACTATAATAACTTTAATTCCAAATAACATCCAAATAACTTTAATTCC						cg	R	B	C	II	1	7	101940004	Mus musculus	mm10	aCACTaTaaTAACTTTAaTTCCAaaTaaCATCCAaaTAaCTTTaaTTCCr	TGTGTCTGCACAGCACTGTGGTAACTTTAGTTCCAGGTGGCATCCAGGTAGCTTTGGTTC[CG]GGTGTCTGCACAGCACTATGGTCTATGTCTGTCAGTGTGTAATTCTGTTCTGTTCCAGGT	TGTGTCTGCACAGCACTGTGGTAACTTTAGTTCCAGGTGGCATCCAGGTAGCTTTGGTTC[CG]GGTGTCTGCACAGCACTATGGTCTATGTCTGTCAGTGTGTAATTCTGTTCTGTTCCAGGT	GRCm10															FALSE	.	.	.	.	.	.	.
0.628716	-1.14382	8.41862	4.56606e-07	0.000738092	6.6183	cg29767491	85699442	TAACTCATAACACTAATAACATCAAATTATCCACTTTTATACAATCTCTC						cg	R	B	C	II	1	11	75535002	Mus musculus	mm10	aACTCATaaCACTaaTaACATCAaATTaTCCACTTTTATACAATCTCTCr	TTCTTTTTTTCTGACTCATGGCACTGGTGACATCAGATTGTCCACTTTTATACAATCTCT[CG]GACGGCATGGGCGCCCTGGGGCTGGAAACTGTTTTCCTGGGGAGACGCTGTCTTCTTCCT	TTCTTTTTTTCTGACTCATGGCACTGGTGACATCAGATTGTCCACTTTTATACAATCTCT[CG]GACGGCATGGGCGCCCTGGGGCTGGAAACTGTTTTCCTGGGGAGACGCTGTCTTCTTCCT	GRCm10														chr11:75531101-75532171	FALSE	Slc43a2	NM_173388.2	chr11	75531693	75577572	45880	+
-1.50402	-0.763222	-8.39731	4.71337e-07	0.000757094	6.58921	cg29853405	51747409	CTATAAATAAACAATCCAAAAACTATAAATTTAACCCAAACATCATATCA	81795111	CTATAAATAAACAATCCAAAAACTATAAATTTAACCCAAACATCATATCG	A	Red	R	cg	F	T	C	I	1	11	83694518	Mus musculus	mm10	CTATAaaTaaACAaTCCAAaaaCTaTaaaTTTaaCCCAaACATCATaTCr	GGAACAAACCCCTCAAACCCTCAGAAGGAATCCTACAGAGAGAAGACAGTGCAGAGCTAA[CG]ACATGATGTCTGGGCCAAACCCACAGCCCTTGGACTGTCCACCTATAGCTTTCTCTGAAA	GGAACAAACCCCTCAAACCCTCAGAAGGAATCCTACAGAGAGAAGACAGTGCAGAGCTAA[CG]ACATGATGTCTGGGCCAAACCCACAGCCCTTGGACTGTCCACCTATAGCTTTCTCTGAAA	GRCm10															FALSE	.	.	.	.	.	.	.
1.092	2.4478	8.39326	4.74196e-07	0.000757094	6.58366	cg30887020	21661147	CTAAAATACRATCTTTAAAATCATTACTACTACCCACTTAAATCAAAAAC						cg	R	B	C	II	1	12	83580373	Mus musculus	mm10	TAAaATaCrATCTTTaaAaTCATTaCTaCTaCCCACTTaaATCAaAaaCr	CATTCTGAGTACTAAGATGCGATCTTTGGAGTCATTGCTGCTGCCCACTTGGATCAGAGG[CG]GCCGGCTGGTGCCTTCCTCCCATGAAATACTCTGATTTCCAAATAGAAATAGTAGGGATC	CATTCTGAGTACTAAGATGCGATCTTTGGAGTCATTGCTGCTGCCCACTTGGATCAGAGG[CG]GCCGGCTGGTGCCTTCCTCCCATGAAATACTCTGATTTCCAAATAGAAATAGTAGGGATC	GRCm10															FALSE	Zfyve1	NM_183154.3	chr12	83546940	83597147	50208	-
0.604824	1.36724	8.39029	4.763e-07	0.000757094	6.5796	cg35398968	62773366	AAATACCAAAAATAAACAAATACTCCAACATCACAATAAACCTATCCTTC						cg	R	B	C	II	1	18	6487692	Mus musculus	mm10	aaTaCCAaaAaTaaACAaaTaCTCCAACATCACAaTaAaCCTaTCCTTCr	CAACTTTTCTAAGGTGCCAGGAGTGGACAGGTGCTCCAACATCACAGTGAGCCTGTCCTT[CG]CTTGTGGATTCATTCTCAGAGTCTTGATACATTTTCTGGACTGTCTCAGCCTCTGATTAC	CAACTTTTCTAAGGTGCCAGGAGTGGACAGGTGCTCCAACATCACAGTGAGCCTGTCCTT[CG]CTTGTGGATTCATTCTCAGAGTCTTGATACATTTTCTGGACTGTCTCAGCCTCTGATTAC	GRCm10	chr18:6489942-6491263														FALSE	Epc1	NM_027497.3	chr18	6435950	6490857	54908	-
0.613161	-0.0503002	8.37977	4.8384e-07	0.00076483	6.5652	cg40963441	49803187	CTCAAAAAAATACAACAAAAACATCTAACAATCTCCTCTAAATACTACAC						cg	R	B	C	II	1	4	62435435	Mus musculus	mm10	TCAAAaAAATACAaCAAAAACATCTaACAaTCTCCTCTaaaTaCTACACr	AAAGACTCTGCCTCAAAGAAATACAGCAAAAACATCTGACAGTCTCCTCTGGGTGCTACA[CG]CATGCCCATGTGTGAGTTCACACACACACTTACCTACTCAGGCTGCAGAGTAAAGGAGAT	AAAGACTCTGCCTCAAAGAAATACAGCAAAAACATCTGACAGTCTCCTCTGGGTGCTACA[CG]CATGCCCATGTGTGAGTTCACACACACACTTACCTACTCAGGCTGCAGAGTAAAGGAGAT	GRCm10															FALSE	Rnf183	NM_153504.3	chr4	62434926	62436226	1301	-
1.63755	-2.76013	8.37434	4.87775e-07	0.000766814	6.55778	cg29758523	84600879	TCACCTAACAATACTTAAAATTACTATCAAATAAAACACTAAAACAACCA	98603219	TCACCTAACAATACTTAAAATTACTATCGAATAAAACACTAAAACAACCG	T	Red	R	cg	R	B	C	I	1	11	74838141	Mus musculus	mm10	TCACCTaaCAaTaCTTAaaATTACTATCraaTaaaaCACTaAaaCAACCr	GTGTGTCTGCGTTCACCTGGCAGTGCTTAGGATTACTATCGGGTGGGGCACTGAGGCAAC[CG]GAGTGACAGCGCGAGGCTACCGAGCCTTAACTATTTCCATTCCGCGAATGCTGGGAAGGG	GTGTGTCTGCGTTCACCTGGCAGTGCTTAGGATTACTATCGGGTGGGGCACTGAGGCAAC[CG]GAGTGACAGCGCGAGGCTACCGAGCCTTAACTATTTCCATTCCGCGAATGCTGGGAAGGG	GRCm10			chr11:74837648-74838752	chr11	74837648	74838752	1104	90	718	16.3	65	0.78			FALSE	Mnt	NM_010813.3	chr11	74830923	74845725	14803	+
-0.885268	-1.11029	-8.3609	4.97676e-07	0.000771847	6.53935	cg29846053	11748438	ACTTTCTAACAACAAAACAAAACTATACTCAAATCATATAATAAACCCCA	62682952	ACTTTCTAACAACAAAACAAAACTATACTCAAATCATATAATAAACCCCG	G	Grn	G	cg	R	B	C	I	1	11	82905137	Mus musculus	mm10	aCTTTCTAACAaCAaAaCAAaaCTaTaCTCAaaTCATaTaATaAaCCCCr	AATCTCTTAACAGCTTTCTAACAGCAGAGCAAGGCTGTGCTCAGGTCATGTGATGAGCCC[CG]CCCCCCCCCCCCAGCAGCAAGGGGTGTGGCCATAGTAGGCCAAGCCGTTGCTGTCATGGG	AATCTCTTAACAGCTTTCTAACAGCAGAGCAAGGCTGTGCTCAGGTCATGTGATGAGCCC[CG]CCCCCCCCCCCCAGCAGCAAGGGGTGTGGCCATAGTAGGCCAAGCCGTTGCTGTCATGGG	GRCm10	chr11:82907990-82908509														FALSE	Nle1	NM_145431.2	chr11	82900767	82908395	7629	-
0.711488	-0.314302	8.35729	5.00369e-07	0.000771847	6.53439	cg29947325	60754427	AACTCTACTTAACAAAAATCAACTCTTAACAAAAATAAATCTACAAAATC						cg	R	B	C	II	1	11	93988446	Mus musculus	mm10	ACTCTaCTTaaCAaAAaTCAACTCTTAACAAaAATaaATCTaCAAaaTCr	CAGCGGTGAGCAACTCTGCTTGGCAGAAGTCAACTCTTAACAAGAATGGATCTGCAAGGT[CG]TCCCCATGAAATCTGTTTACAGAATGTTTGGGGGGGGCGCAGGTGCAGCTCAGCGGCACT	CAGCGGTGAGCAACTCTGCTTGGCAGAAGTCAACTCTTAACAAGAATGGATCTGCAAGGT[CG]TCCCCATGAAATCTGTTTACAGAATGTTTGGGGGGGGCGCAGGTGCAGCTCAGCGGCACT	GRCm10															FALSE	.	.	.	.	.	.	.
0.832537	0.0827065	8.35186	5.04456e-07	0.000771847	6.52693	cg36163881	58749540	CAATTCAATTAATTTCTAAAAAAAATTCACCAAAACTCACTCACTCTTCC						cg	R	B	C	II	1	19	12633526	Mus musculus	mm10	AaTTCAaTTAATTTCTaAAAaAaATTCACCAAAaCTCACTCACTCTTCCr	ATTTTCTGCCTCAGTTCAGTTAATTTCTGAAAGAGATTCACCAAAGCTCACTCACTCTTC[CG]GTTCTCACCAAGCCTGCTGTATCAGACTTTCATCTCTCAGAAGTCCATTTTTACGAAGAT	ATTTTCTGCCTCAGTTCAGTTAATTTCTGAAAGAGATTCACCAAAGCTCACTCACTCTTC[CG]GTTCTCACCAAGCCTGCTGTATCAGACTTTCATCTCTCAGAAGTCCATTTTTACGAAGAT	GRCm10															FALSE	Glyat	NM_145935.3	chr19	12633307	12651737	18431	+
0.566965	-1.14402	8.35085	5.05212e-07	0.000771847	6.52556	cg45615919	28765545	AATTACRTTTACATCTACACTCTAACTACCTCTCTTCTCATTATACCAAC						cg	R	B	C	II	1	8	41135942	Mus musculus	mm10	aTTACrTTTACATCTaCACTCTaACTaCCTCTCTTCTCATTATACCAACr	AAGTCGCTCTAGGTTACGTTTACATCTGCACTCTGACTGCCTCTCTTCTCATTATACCAA[CG]CCCGGTGGCTATCGCATGTTCTCATCTTTGACACTCTGCCAAGTGAAACAGGGATTTTTA	AAGTCGCTCTAGGTTACGTTTACATCTGCACTCTGACTGCCTCTCTTCTCATTATACCAA[CG]CCCGGTGGCTATCGCATGTTCTCATCTTTGACACTCTGCCAAGTGAAACAGGGATTTTTA	GRCm10													chr8:41133448-41134122		FALSE	.	.	.	.	.	.	.
0.703689	1.00701	8.35046	5.05509e-07	0.000771847	6.52502	cg39331468	8758459	TTACAACAACCCACAACAATAAAACTAATCCTAAAATAAAAACATTAAAC						cg	R	B	C	II	1	2	170188838	Mus musculus	mm10	TACAACAaCCCACAaCAaTaAAACTaaTCCTaaaaTaAaAaCATTaAaCr	CAGGGCCTGGTTTACAACAGCCCACAGCAGTGAAACTGGTCCTGGGGTGAGAGCATTGAG[CG]CCTGCTCCGACGAGGCCACGCCCACTTCCCCCTCACGCCTCGCCCCCCACACCTTGCATT	CAGGGCCTGGTTTACAACAGCCCACAGCAGTGAAACTGGTCCTGGGGTGAGAGCATTGAG[CG]CCTGCTCCGACGAGGCCACGCCCACTTCCCCCTCACGCCTCGCCCCCCACACCTTGCATT	GRCm10															FALSE	.	.	.	.	.	.	.
0.747531	0.626016	8.34828	5.07162e-07	0.000771847	6.52202	cg35209533	77792905	CAACCTAATACACAAAACTAAAAACCRAACACATTTATAAACTATACTTC						cg	R	B	C	II	1	17	74599322	Mus musculus	mm10	AACCTAATaCACAAaaCTAaAAACCrAaCACATTTATaaaCTATACTTCr	AATACACACACCAACCTAATGCACAAGGCTAGAAACCGAGCACATTTATGGGCTATACTT[CG]TCCTGCCTCAAAGAAGCATACACGGACAATATCGGAAAGACATTTCCGTGTTTTTGAAAG	AATACACACACCAACCTAATGCACAAGGCTAGAAACCGAGCACATTTATGGGCTATACTT[CG]TCCTGCCTCAAAGAAGCATACACGGACAATATCGGAAAGACATTTCCGTGTTTTTGAAAG	GRCm10															FALSE	Birc6	NM_007566.3	chr17	74528294	74703356	175063	+
0.780894	-0.485528	8.33014	5.21136e-07	0.000788917	6.49708	cg30466314	76636870	AATTAACCTTAAAAACAATCRAATAAATAATCAACCATTCCTCAAATACC						cg	F	T	C	II	1	12	24962788	Mus musculus	mm10	aTTAaCCTTaAaaaCAATCraATaAATaATCAACCATTCCTCAaATaCCr	ACACTGTGACTGTAACCTTAACCTGCCCAAGGACCATGCGTACCTGTTACATTCCACCAG[CG]GCATCTGAGGAATGGTTGATCATTCATCCGATTGCCCTCAAGGCTAACTTTCTGCTTCTC	ACACTGTGACTGTAACCTTAACCTGCCCAAGGACCATGCGTACCTGTTACATTCCACCAG[CG]GCATCTGAGGAATGGTTGATCATTCATCCGATTGCCCTCAAGGCTAACTTTCTGCTTCTC	GRCm10															FALSE	.	.	.	.	.	.	.
0.894934	1.53118	8.31144	5.35962e-07	0.000802903	6.47132	cg48051258	73603187	ATAAACCTTAAAAAATCCCAAAATACAAACAAACTTAAACTTTATCCTTC						cg	R	B	C	II	1	X	139806158	Mus musculus	mm10	TaAACCTTaAaAaaTCCCAaAaTaCAAACAaaCTTaaACTTTATCCTTCr	AATGGCAATAGGTGAACCTTGAGAGGTCCCAGAGTGCAAACAGGCTTGGACTTTATCCTT[CG]CCATTGGAATGTCCTAGAGGAGCAACTTGCTGTGAAAGCATGATGATCGGAGTTCAGAGC	AATGGCAATAGGTGAACCTTGAGAGGTCCCAGAGTGCAAACAGGCTTGGACTTTATCCTT[CG]CCATTGGAATGTCCTAGAGGAGCAACTTGCTGTGAAAGCATGATGATCGGAGTTCAGAGC	GRCm10															FALSE	Cldn2	NM_016675.4	chrX	139800807	139811386	10580	+
-0.96508	-5.09736	-8.31141	5.35987e-07	0.000802903	6.47128	cg35787018	6695527	ATATCTAACTTACTAACTAATCAAATACCCCATCATTCAACTAACTTTAC						cg	F	T	C	II	1	18	60526517	Mus musculus	mm10	TaTCTAaCTTaCTaACTaaTCAAaTaCCCCATCATTCAaCTaaCTTTaCr	GCCTCAGCCCCACCCGGGGCCGCCCCCTTTTCCAAGTGACTATCCACAAGCAAATGAAAT[CG]CAAAGCCAGCTGAATGATGGGGCACTTGACCAGTCAGCAAGCTAGACACACGGTTTCCCC	GCCTCAGCCCCACCCGGGGCCGCCCCCTTTTCCAAGTGACTATCCACAAGCAAATGAAAT[CG]CAAAGCCAGCTGAATGATGGGGCACTTGACCAGTCAGCAAGCTAGACACACGGTTTCCCC	GRCm10													chr18:60526084-60526466		FALSE	Dctn4	NM_026302.3	chr18	60526220	60558762	32543	+
0.570005	-0.391982	8.2956	5.48872e-07	0.000811202	6.44946	cg45059417	3768897	ACTATACTAAACATAACTCATATATATCTCCAAATATTCCTCTCTCCAAC						cg	R	B	C	II	1	7	119618195	Mus musculus	mm10	CTaTaCTAAACATaaCTCATaTATaTCTCCAaATATTCCTCTCTCCAACr	CTGAGCCAGCCACTGTGCTAAACATGGCTCATGTATGTCTCCAGATATTCCTCTCTCCAA[CG]TGCCATCATTATATTGCAGATAAAGAAAGGAAATGGCAGAAAAGTTAAGTGATTTGACCA	CTGAGCCAGCCACTGTGCTAAACATGGCTCATGTATGTCTCCAGATATTCCTCTCTCCAA[CG]TGCCATCATTATATTGCAGATAAAGAAAGGAAATGGCAGAAAAGTTAAGTGATTTGACCA	GRCm10															FALSE	Acsm1	NM_054094.5	chr7	119617822	119662515	44694	+
0.61495	-2.26558	8.29329	5.50775e-07	0.000811202	6.44628	cg42055357	75671567	RTTAACCATTAACTAACAAAACTCCTACTCTTTAACCCAACTCTATTTAC						cg	R	B	C	II	1	5	37651100	Mus musculus	mm10	TTAACCATTAACTAaCAAAACTCCTaCTCTTTAACCCAaCTCTaTTTACr	AGAGTAGCTGCGTTAACCATTAACTAGCAAAACTCCTGCTCTTTAACCCAGCTCTGTTTA[CG]TTCAGAATAACTTACTAGAACCAGAAATTCCTTACTTCACCTCTCTCCACTCCCTACAGG	AGAGTAGCTGCGTTAACCATTAACTAGCAAAACTCCTGCTCTTTAACCCAGCTCTGTTTA[CG]TTCAGAATAACTTACTAGAACCAGAAATTCCTTACTTCACCTCTCTCCACTCCCTACAGG	GRCm10															FALSE	Stk32b	NM_022416.2	chr5	37446824	37717153	270330	-
0.548714	-0.364225	8.2914	5.52345e-07	0.000811202	6.44366	cg35177761	12704488	ATATCACTATTTTAATAAATAACTCACAAACTATCCTACCTACAAACAAC						cg	F	T	C	II	1	17	71202260	Mus musculus	mm10	TaTCACTaTTTTaATaAATAACTCACAAACTaTCCTaCCTaCAAACAaCr	ATTCCAGAGGTGGCGATCTAGGTGTAGAGAGGAGCTCATCTCTGGTGGGTCCAAGGTACA[CG]CTGTTTGCAGGCAGGACAGTTTGTGAGTTATTCATCAAAACAGTGACATAATACTGAGGT	ATTCCAGAGGTGGCGATCTAGGTGTAGAGAGGAGCTCATCTCTGGTGGGTCCAAGGTACA[CG]CTGTTTGCAGGCAGGACAGTTTGTGAGTTATTCATCAAAACAGTGACATAATACTGAGGT	GRCm10															FALSE	Lpin2	NM_022882.4	chr17	71183977	71249818	65842	+
0.62584	-0.822434	8.28687	5.56127e-07	0.000811202	6.43739	cg36355786	41759444	RCCCRAAATAAAAACTTAATAAAACACTTTCTACAATCTAAAACAATAAC						cg	R	B	C	II	1	19	37075965	Mus musculus	mm10	CCCrAAATaaAaACTTaaTaaAaCACTTTCTaCAaTCTaaaaCAATaACr	AGAAGACGCACGCCCGAAATGGAGACTTGGTGGAGCACTTTCTGCAGTCTGGGGCAATGA[CG]TGGAGAGTTAGCATTAAAGCTGTTTATGTAACTACACTTTCTCATCATAAAGAGGGCCTT	AGAAGACGCACGCCCGAAATGGAGACTTGGTGGAGCACTTTCTGCAGTCTGGGGCAATGA[CG]TGGAGAGTTAGCATTAAAGCTGTTTATGTAACTACACTTTCTCATCATAAAGAGGGCCTT	GRCm10															FALSE	Cpeb3	NM_001290826.1	chr19	37021290	37176063	154774	-
0.631331	-0.894407	8.28394	5.58576e-07	0.000811202	6.43335	cg32710831	86719482	ATTTTCCCAACTTAAATTTATAAAACTACCRTACCCCCATCAAACCTAAC						cg	F	T	C	II	1	14	77485336	Mus musculus	mm10	TTTTCCCAaCTTaaaTTTaTAaAACTaCCrTaCCCCCATCAaaCCTaaCr	CATGGCCCACTGGCCAGATGCCGCTCTGTTCTCTGTTGGAACACACCTCCAGCTGGGCTA[CG]CCAGGCCTGATGGGGGCACGGCAGTTCTACAAACCCAAGCTGGGAAAATGACCTTTGGTA	CATGGCCCACTGGCCAGATGCCGCTCTGTTCTCTGTTGGAACACACCTCCAGCTGGGCTA[CG]CCAGGCCTGATGGGGGCACGGCAGTTCTACAAACCCAAGCTGGGAAAATGACCTTTGGTA	GRCm10															FALSE	Enox1	NM_172813.3	chr14	77156762	77721763	565002	+
0.769045	-0.642367	8.28116	5.60919e-07	0.000811202	6.42951	cg29907273	68661591	CTACTCCTAAACAAACTAAATTAATAAACTTAAACRAAAAAACCTACCCC						cg	F	T	C	II	1	11	88693596	Mus musculus	mm10	TaCTCCTaAaCAAaCTAAaTTAaTaAaCTTaaaCraaAaaaCCTaCCCCr	ACACTACCAAGGGCCGCCTCAGAAAGGGCGCCGCCTCCTTGGCTCTTTTGACAACCTTCA[CG]GGGCAGGCCCTCCCGCCCAAGCTCACTAACTTAGCTTGCTCAGGAGCAGAGTGCTTCTCT	ACACTACCAAGGGCCGCCTCAGAAAGGGCGCCGCCTCCTTGGCTCTTTTGACAACCTTCA[CG]GGGCAGGCCCTCCCGCCCAAGCTCACTAACTTAGCTTGCTCAGGAGCAGAGTGCTTCTCT	GRCm10															FALSE	Msi2	NM_054043.3	chr11	88339381	88718229	378849	-
0.625894	0.0534033	8.27975	5.62112e-07	0.000811202	6.42756	cg36304171	44659121	ACTTCAATTAAAATCCTATACAAAATAAACAAATCCCTACTCCACATTAC						cg	R	B	C	II	1	19	30160257	Mus musculus	mm10	CTTCAATTAAaATCCTaTaCAAaATaaACAaaTCCCTaCTCCACATTaCr	AGGCCAGCCAAGCTTCAATTAAGATCCTGTGCAAGATGGACAGGTCCCTGCTCCACATTG[CG]CCATCTGGACAAAGGTCCAGCTCTCAAATGAGAACAGTCTGACAGGATTTGCTGGTCCAA	AGGCCAGCCAAGCTTCAATTAAGATCCTGTGCAAGATGGACAGGTCCCTGCTCCACATTG[CG]CCATCTGGACAAAGGTCCAGCTCTCAAATGAGAACAGTCTGACAGGATTTGCTGGTCCAA	GRCm10															FALSE	Gldc	NM_138595.2	chr19	30098440	30175441	77002	-
0.85415	1.66942	8.27568	5.65571e-07	0.000811202	6.42192	cg40133013	90738214	TATAAAAACTACTACTCCTAAAATCTCTAAATCAACATATAAAACCATAC						cg	R	B	C	II	1	3	103834308	Mus musculus	mm10	ATAaAAACTaCTACTCCTAaAATCTCTaAATCAaCATATaAaACCATACr	GTGTAAATCATTATAGAAACTGCTACTCCTAGAATCTCTGAATCAGCATATGAGACCATA[CG]CAAATATCAAGCCTGCTCTCTTCCCAGCAGTATTCACTAATTTTGAATCGTGCCTTACAC	GTGTAAATCATTATAGAAACTGCTACTCCTAGAATCTCTGAATCAGCATATGAGACCATA[CG]CAAATATCAAGCCTGCTCTCTTCCCAGCAGTATTCACTAATTTTGAATCGTGCCTTACAC	GRCm10															FALSE	Bcl2l15	NM_001142959.1	chr3	103832695	103838648	5954	+
0.784559	-2.47361	8.27395	5.67044e-07	0.000811202	6.41953	cg30018466	69749254	CATACRCTCAACAAACAAAAATACRTCAATAACTCCCAAATATAAAAACC						cg	R	B	C	II	1	11	98936216	Mus musculus	mm10	ATaCrCTCAaCAaaCAAaAATaCrTCAATaaCTCCCAaATaTaaAaaCCr	CCATCCACAAACATGCGCTCAGCAGGCAAGAATGCGTCAATGGCTCCCAGATGTGGAGGC[CG]CCGCTTAACCCATTCCCTTCCACGCACCCACTCCCGTGCCCCCGTCAAGCCTTCCAGCCA	CCATCCACAAACATGCGCTCAGCAGGCAAGAATGCGTCAATGGCTCCCAGATGTGGAGGC[CG]CCGCTTAACCCATTCCCTTCCACGCACCCACTCCCGTGCCCCCGTCAAGCCTTCCAGCCA	GRCm10		chr11:98937354-98938138	chr11:98936171-98936439	chr11	98936171	98936439	268	25	180	18.7	67.2	0.9			FALSE	Rara	NM_009024.2	chr11	98936195	98937495	1301	+
0.569099	0.641232	8.26259	5.76834e-07	0.000821101	6.40379	cg43458988	13712291	TAAATAAACAACTAACTATATCTAAAAATCTTAACAACTCAATCCCTTAC						cg	R	B	C	II	1	6	55328053	Mus musculus	mm10	aaaTAAACAaCTaaCTaTaTCTaaaAATCTTAACAACTCAaTCCCTTaCr	TATTCAATCTCTGGGTAAACAGCTGGCTGTGTCTGGGAATCTTAACAACTCAGTCCCTTG[CG]GCTTATGGTGTAGCTCTGGGACAAGTTGGCATTCCCTGGGTGCCTGTTAGAACGTGGAAC	TATTCAATCTCTGGGTAAACAGCTGGCTGTGTCTGGGAATCTTAACAACTCAGTCCCTTG[CG]GCTTATGGTGTAGCTCTGGGACAAGTTGGCATTCCCTGGGTGCCTGTTAGAACGTGGAAC	GRCm10															FALSE	.	.	.	.	.	.	.
0.511961	0.268436	8.23885	5.97866e-07	0.000843846	6.37086	cg31109915	91642478	TAACTCAACTTCCTAACCRCCCTAACTCAAAAAACATATTCTTAAATACC						cg	R	B	C	II	1	12	108699705	Mus musculus	mm10	aaCTCAACTTCCTaaCCrCCCTaaCTCAaAAaaCATaTTCTTAaATaCCr	CTGGTGTGTAATGGCTCAACTTCCTGGCCGCCCTGGCTCAGAAGGCATGTTCTTAGATGC[CG]CCATGGGATCGTATTTTCTTAGGACACTGTGCCAGGAGAGCATGTCCTCGCCCTTGGAGA	CTGGTGTGTAATGGCTCAACTTCCTGGCCGCCCTGGCTCAGAAGGCATGTTCTTAGATGC[CG]CCATGGGATCGTATTTTCTTAGGACACTGTGCCAGGAGAGCATGTCCTCGCCCTTGGAGA	GRCm10	chr12:108701848-108702598														FALSE	Degs2	NM_001171002.1	chr12	108686791	108702306	15516	-
0.808869	-2.73553	8.23657	5.99927e-07	0.000843846	6.36769	cg29898723	48753225	AATCRTCTATATAAAAATCAACCACTACTACTAATTAAAATCTATAAATC						cg	F	T	C	II	1	11	88067300	Mus musculus	mm10	aTCrTCTaTaTAaaAaTCAaCCACTaCTACTaaTTaaAATCTaTAaATCr	ACAGTAGCTACCTCTATGTGAGGAAAGGATAGAAAACATTCAAGACATCATATGGGCTTA[CG]ATCTACAGATTCCAACCAGTAGCAGTGGCTGACTCCTACACAGACGACTGGGAACTGCAA	ACAGTAGCTACCTCTATGTGAGGAAAGGATAGAAAACATTCAAGACATCATATGGGCTTA[CG]ATCTACAGATTCCAACCAGTAGCAGTGGCTGACTCCTACACAGACGACTGGGAACTGCAA	GRCm10		chr11:88067845-88069300													FALSE	Vezf1	NM_016686.4	chr11	88066778	88068078	1301	+
0.557387	-0.483662	8.23466	6.0166e-07	0.000843846	6.36504	cg42427222	41701243	CCAACAAATTCTTTTTAAAATCCTACCTATATCACCTTCACTATTTTTCC						cg	R	B	C	II	1	5	93098309	Mus musculus	mm10	CAaCAAATTCTTTTTaaAATCCTaCCTaTATCACCTTCACTaTTTTTCCr	TTTCTGATCACCCAGCAAATTCTTTTTGGAATCCTGCCTGTATCACCTTCACTGTTTTTC[CG]CTCAACAGAAGCTGCACTGGGTTGCCAGCAGGGTCAGCCGAGGTATTGTTTAGTTGGAAG	TTTCTGATCACCCAGCAAATTCTTTTTGGAATCCTGCCTGTATCACCTTCACTGTTTTTC[CG]CTCAACAGAAGCTGCACTGGGTTGCCAGCAGGGTCAGCCGAGGTATTGTTTAGTTGGAAG	GRCm10															FALSE	Sept11	NM_001009818.2	chr5	93093415	93175075	81661	+
0.638708	1.46374	8.22686	6.08797e-07	0.000849691	6.35419	cg32382747	70643905	CAAATAATAACRAAAACAATCTTTACACCAAACTCTTACCTAACAAAATC						cg	R	B	C	II	1	14	36917221	Mus musculus	mm10	AAaTAaTAACrAAaaCAATCTTTACACCAaaCTCTTaCCTaaCAaaATCr	CAAGAGGGATGCAAGTAGTAACGAAGGCAATCTTTACACCAGGCTCTTGCCTGGCAGGAT[CG]ACTCGGAAGCTGTTCCCATCAAAGCCTGAATGTACAGACATACTGTATGCATTCTGCTAG	CAAGAGGGATGCAAGTAGTAACGAAGGCAATCTTTACACCAGGCTCTTGCCTGGCAGGAT[CG]ACTCGGAAGCTGTTCCCATCAAAGCCTGAATGTACAGACATACTGTATGCATTCTGCTAG	GRCm10															FALSE	Ccser2	NM_028407.3	chr14	36874935	36935568	60634	-
0.570602	-2.01436	8.22253	6.12796e-07	0.00085112	6.34817	cg37711092	41799827	TTATTCCAAAACCCCTTCTATAAAAAATACTATACCAACAAATTAAAATC						cg	R	B	C	II	1	1	164461205	Mus musculus	mm10	TaTTCCAaaaCCCCTTCTaTaAAaaaTaCTaTACCAaCAaaTTaAAATCr	GGGCTGGGCTTTTGTTCCAGGGCCCCTTCTGTGAAGGGTGCTGTACCAGCAGGTTGAAAT[CG]AAATGTGTGTGGTTCTCGAGAGGGAGGGGTGCCTCCAGCAGGTGCAGCACACAGCTGGGT	GGGCTGGGCTTTTGTTCCAGGGCCCCTTCTGTGAAGGGTGCTGTACCAGCAGGTTGAAAT[CG]AAATGTGTGTGGTTCTCGAGAGGGAGGGGTGCCTCCAGCAGGTGCAGCACACAGCTGGGT	GRCm10														chr1:164457666-164458737	FALSE	.	.	.	.	.	.	.
0.907593	1.19435	8.20457	6.29683e-07	0.000870349	6.32315	cg37431890	82742499	ATTTTCACRCTAATCTCTCCATATCAAAATTTCCCTTTTTATATATACAC						cg	R	B	C	II	1	1	127729462	Mus musculus	mm10	TTTTCACrCTaATCTCTCCATATCAaAATTTCCCTTTTTaTATaTACACr	AATGAACTCTGATTTTCACGCTGATCTCTCCATATCAGAATTTCCCTTTTTGTATGTACA[CG]TGTCTCCTCTGGTCCTGTGGAGATGAAAATTGACATCCACACTCATATTCTACCAAAGGA	AATGAACTCTGATTTTCACGCTGATCTCTCCATATCAGAATTTCCCTTTTTGTATGTACA[CG]TGTCTCCTCTGGTCCTGTGGAGATGAAAATTGACATCCACACTCATATTCTACCAAAGGA	GRCm10															FALSE	Acmsd	NM_001033041.2	chr1	127729412	127767564	38153	+
0.778197	1.30989	8.18021	6.53366e-07	0.000898743	6.28915	cg38230325	19692291	TCRAATAAAATATATCCCAACATACCCTACATATAACCCTAAAAATAAAC						cg	F	T	C	II	1	2	31475795	Mus musculus	mm10	CraaTaaaaTaTATCCCAaCATaCCCTaCATaTAaCCCTaAaAaTAaaCr	GGCGGCTGAGCTGCAGACCCTGAGCTTCCTCTGTACGGTCCAGCGTGATGGCTATAATAG[CG]CCTACTCTCAGGGCTACATGCAGGGCATGCTGGGATACACCCCACCCGAGGGCTCTCGCA	GGCGGCTGAGCTGCAGACCCTGAGCTTCCTCTGTACGGTCCAGCGTGATGGCTATAATAG[CG]CCTACTCTCAGGGCTACATGCAGGGCATGCTGGGATACACCCCACCCGAGGGCTCTCGCA	GRCm10															FALSE	Ass1	NM_007494.3	chr2	31470269	31520670	50402	+
0.754325	-0.987785	8.16466	6.68973e-07	0.000915809	6.2674	cg47741683	40792882	CAACAAAAACACTTACACAACTAAAACCTAAAATACACACAAATAAAACA	61786885	CGACAAAAACGCTTACACAACTAAAACCTAAAATACGCACAAATAAAACG	T	Red	R	cg	F	T	C	I	1	X	74085265	Mus musculus	mm10	CrACAAaaaCrCTTaCACAaCTaaaaCCTAaaATaCrCACAaATaaaaCr	AGCGACGGTTCTCAGCGCGATCTCCCTGGAGCCACCTTCGAATGACGCCCTCCCGCTGCC[CG]CCCCATCTGTGCGCATCCTAGGCCCCAGCTGTGCAAGCGCCCTTGTCGTCTGGGCTTCGC	AGCGACGGTTCTCAGCGCGATCTCCCTGGAGCCACCTTCGAATGACGCCCTCCCGCTGCC[CG]CCCCATCTGTGCGCATCCTAGGCCCCAGCTGTGCAAGCGCCCTTGTCGTCTGGGCTTCGC	GRCm10			chrX:74085010-74085723	chrX	74085010	74085723	713	78	483	21.9	67.7	0.95			FALSE	Mecp2	NM_010788.4	chrX	74026591	74085690	59100	-
0.644927	-0.165571	8.1606	6.7312e-07	0.000917097	6.26171	cg38049753	93767570	TAATAAATAATAACAACACACATACACACTTAACTATCTATACTAAACCA	52805958	TAATAAATAATAACGACGCGCATACACACTTAACTATCTATACTAAACCG	A	Red	R	cg	F	T	C	I	1	2	9918866	Mus musculus	mm10	TAATaAaTAATaACraCrCrCATaCACACTTaACTaTCTaTaCTAaACCr	GTGTCGGGCAGAAGCAAGTGAGAGTTAGAAAGCCCTCAGCTTTCTGTATCCCCTCAGCCA[CG]GTCTAGCACAGACAGTCAAGTGTGCATGCGCGCCGTCATTACTCATTAGCCAGGCCCTGC	GTGTCGGGCAGAAGCAAGTGAGAGTTAGAAAGCCCTCAGCTTTCTGTATCCCCTCAGCCA[CG]GTCTAGCACAGACAGTCAAGTGTGCATGCGCGCCGTCATTACTCATTAGCCAGGCCCTGC	GRCm10															FALSE	Taf3	NM_027748.3	chr2	9914551	10048609	134059	-
0.762297	1.60517	8.15104	6.82967e-07	0.000926103	6.24833	cg45728580	73710821	ACATCTATAAACTAATATAAACAACATCTCTCCTAATAAACACCACTATC						cg	R	B	C	II	1	8	57482945	Mus musculus	mm10	CATCTATaaaCTAaTaTaAACAaCATCTCTCCTAaTaAACACCACTaTCr	TTTCCAGGCAGACATCTATGGGCTAGTGTGAACAGCATCTCTCCTAGTGAACACCACTGT[CG]GCCTTGAGATCCGATTTGTTCTTGTCGTTCCTCACTGAGTAGATGAAACATGTTAAGGTG	TTTCCAGGCAGACATCTATGGGCTAGTGTGAACAGCATCTCTCCTAGTGAACACCACTGT[CG]GCCTTGAGATCCGATTTGTTCTTGTCGTTCCTCACTGAGTAGATGAAACATGTTAAGGTG	GRCm10	chr8:57486939-57488010														FALSE	Sap30	NM_021788.2	chr8	57482701	57487860	5160	-
0.917479	1.22291	8.14346	6.90897e-07	0.000932438	6.23769	cg29896250	48778475	AATAACAACCRTCAAATACTAATTATCAATATTAATATTACCAAACTACC						cg	F	T	C	II	1	11	87852034	Mus musculus	mm10	aTAaCAACCrTCAAATACTAATTaTCAATATTaATATTaCCAAACTaCCr	TGACATTCAGAAGTCATGGTTCACTGGCACATCCAAGGAAAGATGGTATAAGTTTAATTC[CG]GCAGTTTGGCAATATCAATATTGACAATTAGTATTTGACGGTTGCTACTTATTCATCCGA	TGACATTCAGAAGTCATGGTTCACTGGCACATCCAAGGAAAGATGGTATAAGTTTAATTC[CG]GCAGTTTGGCAATATCAATATTGACAATTAGTATTTGACGGTTGCTACTTATTCATCCGA	GRCm10		chr11:87853132-87853340													FALSE	Mks1	NM_001039684.2	chr11	87851724	87853024	1301	+
1.45555	0.528096	8.13382	7.01108e-07	0.000937627	6.22416	cg38378433	84799441	ACTAACCCTAAACACCAACCCTATAAAACTCAATTATAACAATTTACTTC						cg	R	B	C	II	1	2	51823817	Mus musculus	mm10	CTAaCCCTaaACACCAaCCCTaTAaAACTCAaTTaTaACAaTTTACTTCr	TCCATCTCACTGCTAGCCCTGGACACCAGCCCTGTAGAACTCAGTTGTGACAGTTTACTT[CG]GAAGCCTCATCTGTTATGTGACACCTAGCAGAACTGGCCCTTAAATGAGGCTTGGGATGA	TCCATCTCACTGCTAGCCCTGGACACCAGCCCTGTAGAACTCAGTTGTGACAGTTTACTT[CG]GAAGCCTCATCTGTTATGTGACACCTAGCAGAACTGGCCCTTAAATGAGGCTTGGGATGA	GRCm10															FALSE	.	.	.	.	.	.	.
-1.47811	-6.05304	-8.12687	7.08565e-07	0.000937627	6.21441	cg36477227	89726450	RAAAAATATAATAAAAACTTAAACRCTTCCATCCTCCTCRAAAATTTTAC						cg	F	T	C	II	1	19	47579428	Mus musculus	mm10	aaAaaTaTaaTaaAaaCTTaAaCrCTTCCATCCTCCTCrAaaaTTTTaCr	CCGAAGGAGACCTGGCCAACGACGTCGTGGAGCCACCCGGCTCGGGCTCGCAGAGGTCAA[CG]CAAAACCCTCGAGGAGGATGGAAGCGCTCAAGCCTCCACCACACCTCCCGCCGCAGGCGC	CCGAAGGAGACCTGGCCAACGACGTCGTGGAGCCACCCGGCTCGGGCTCGCAGAGGTCAA[CG]CAAAACCCTCGAGGAGGATGGAAGCGCTCAAGCCTCCACCACACCTCCCGCCGCAGGCGC	GRCm10		chr19:47580315-47580629	chr19:47579310-47579871	chr19	47579310	47579871	561	82	384	29.2	68.4	1.25			FALSE	Slk	NM_001164639.1	chr19	47578518	47579818	1301	+
0.595687	0.0470834	8.12568	7.09858e-07	0.000937627	6.21272	cg43090352	29737376	AAAAATCAAAATTTTCCCAACCATAATTACAACTCCATAAAATTCTTATC						cg	R	B	C	II	1	6	3988774	Mus musculus	mm10	AaAATCAAAATTTTCCCAACCATaATTACAaCTCCATaAAATTCTTATCr	CACATCTCAGAAAGAATCAAAATTTTCCCAACCATGATTACAGCTCCATGAAATTCTTAT[CG]GAACAAAACAAAAAGAGTCACTAAGCAAGACTACATTTCAGATATACCTGTGATAGCAGC	CACATCTCAGAAAGAATCAAAATTTTCCCAACCATGATTACAGCTCCATGAAATTCTTAT[CG]GAACAAAACAAAAAGAGTCACTAAGCAAGACTACATTTCAGATATACCTGTGATAGCAGC	GRCm10															FALSE	.	.	.	.	.	.	.
0.567628	1.1862	8.12544	7.1012e-07	0.000937627	6.21238	cg29902888	60786471	ATAAAATAATCTATCCAAATCCATAACAAATAATAAATCCCACACTTACA	89660477	ATAAAATAATCTATCCAAATCCATAACAAATAATAAATCCCACACTTACG	G	Grn	G	cg	R	B	C	I	1	11	88356849	Mus musculus	mm10	ATAAAaTaaTCTaTCCAaaTCCATaaCAAATAaTaAATCCCACACTTaCr	TTATTAATATTAATAAAGTGGTCTGTCCAGGTCCATGGCAAATAGTGAATCCCACACTTG[CG]CCCGGGTGTCTGAGGTAGAGACCGGTGTGTGAAGAAAGCAGGCCAGCCCTGCTTCGCTGC	TTATTAATATTAATAAAGTGGTCTGTCCAGGTCCATGGCAAATAGTGAATCCCACACTTG[CG]CCCGGGTGTCTGAGGTAGAGACCGGTGTGTGAAGAAAGCAGGCCAGCCCTGCTTCGCTGC	GRCm10															FALSE	Msi2	NM_054043.3	chr11	88339381	88718229	378849	-
1.15424	-1.83027	8.12451	7.11128e-07	0.000937627	6.21108	cg34927432	5768502	CAAAACTAATAAAAACCAACTAACTCCAAAAAACAAACAAAAATACCCCA	98761566	CAAAACTAATAAAAACCAACTAACTCCGAAAAACGAACGAAAATACCCCG	G	Grn	G	cg	F	T	C	I	1	17	43077233	Mus musculus	mm10	CAAAaCTaaTAAaAACCAaCTaaCTCCraAaaaCraaCraaAaTaCCCCr	GGCAGTACTACTGCTGTCAGCAGCCTGGACAGCTTGCAGACAGCCGCCCCAGCAGCTGGG[CG]GGGCACTCCCGCCCGCCCTCCGGAGCCAGCTGGTTCTTACCAGCTTTGGCTGCTTTTGAA	GGCAGTACTACTGCTGTCAGCAGCCTGGACAGCTTGCAGACAGCCGCCCCAGCAGCTGGG[CG]GGGCACTCCCGCCCGCCCTCCGGAGCCAGCTGGTTCTTACCAGCTTTGGCTGCTTTTGAA	GRCm10															FALSE	Tnfrsf21	NM_178589.3	chr17	43016554	43089188	72635	+
0.524314	-1.43396	8.11671	7.1963e-07	0.000944065	6.20012	cg37224715	67674947	ATACCAAAAAACATCACAAACTTAAAAAACAACTCTTCTATTACAAAAAC						cg	F	T	C	II	1	1	90969631	Mus musculus	mm10	TACCAaAAAaCATCACAaACTTAaAaAACAaCTCTTCTaTTACAaaAaCr	CCCATCTGGCATGCGGCCTCAAACTGGAGATGTTTACATAAATTAAGAAGTGAGCTCGCT[CG]CTCCTGTAACAGAAGAGCTGTTCTCTAAGTCTGTGATGCTTTCTGGTACAGGTGAGACCT	CCCATCTGGCATGCGGCCTCAAACTGGAGATGTTTACATAAATTAAGAAGTGAGCTCGCT[CG]CTCCTGTAACAGAAGAGCTGTTCTCTAAGTCTGTGATGCTTTCTGGTACAGGTGAGACCT	GRCm10															FALSE	Rab17	NM_008998.4	chr1	90969620	90969820	201	-
0.752626	0.653611	8.114	7.2261e-07	0.000944065	6.1963	cg29899579	5732136	AACATAACAAAAAACACCCACAACCAAACACCTAACAAAATATTAATTAC						cg	F	T	C	II	1	11	88114953	Mus musculus	mm10	aCATaACAAAAAaCACCCACAaCCAaACACCTaaCAaAaTaTTaATTaCr	GGGGAGTCCCCAGCGTCCGAGCTTTTCTCCCTGTGTCCCACTTAGCAAAGCATTGACTAT[CG]CAATCAACACTCTGCCAGGTGTCTGGCTGTGGGTGCTTTTTGTCATGCCAAAAGCAAGTT	GGGGAGTCCCCAGCGTCCGAGCTTTTCTCCCTGTGTCCCACTTAGCAAAGCATTGACTAT[CG]CAATCAACACTCTGCCAGGTGTCTGGCTGTGGGTGCTTTTTGTCATGCCAAAAGCAAGTT	GRCm10															FALSE	Cuedc1	NM_198013.3	chr11	88099145	88194140	94996	+
0.750569	0.732481	8.11036	7.2664e-07	0.000944423	6.19117	cg33689020	73613186	ACATTTATTTATACTAATTTACCATTCACTAAACCTTAATTACTACTTAC						cg	F	T	C	II	1	15	91034333	Mus musculus	mm10	CATTTATTTaTACTaATTTaCCATTCACTaaaCCTTAaTTACTaCTTaCr	GTGATGTCTTGTTGTTGATGTTAGTCGGAGACAAAGTTCACTGATGAACGGAGCAGTAAG[CG]CAAGCAGTAACTAAGGCCCAGTGAATGGCAAATCAGTACAAATAAATGCCTGAAGCAGTG	GTGATGTCTTGTTGTTGATGTTAGTCGGAGACAAAGTTCACTGATGAACGGAGCAGTAAG[CG]CAAGCAGTAACTAAGGCCCAGTGAATGGCAAATCAGTACAAATAAATGCCTGAAGCAGTG	GRCm10															FALSE	Kif21a	NM_001109040.2	chr15	90933274	91049951	116678	-
-0.652875	2.76381	-8.1078	7.29486e-07	0.000944423	6.18757	cg30510092	12763292	ATACCAAAAACTTAATATAACCATAACTTAATTCTATTCAATAAAACTCA	97800400	ATACCGAAAACTTAATATAACCATAACTTAATTCTATTCAATAAAACTCG	A	Red	R	cg	F	T	C	I	1	12	30909101	Mus musculus	mm10	aTaCCrAAAACTTAaTaTAaCCATAaCTTaaTTCTaTTCAaTAaAaCTCr	ATGCAGAAAATCTTGTAATACGTGAAAACTCTATCAAGTCCCAAGGCTGGTATCCAGGAA[CG]AGCTCTACTGAACAGAACCAAGCTATGGCTACACTAAGTTTTCGGCACATGAAGTTTAAG	ATGCAGAAAATCTTGTAATACGTGAAAACTCTATCAAGTCCCAAGGCTGGTATCCAGGAA[CG]AGCTCTACTGAACAGAACCAAGCTATGGCTACACTAAGTTTTCGGCACATGAAGTTTAAG	GRCm10	chr12:30911475-30912293														FALSE	Acp1	NM_021330.4	chr12	30893325	30911612	18288	-
0.818045	0.552198	8.09639	7.42303e-07	0.000956688	6.1715	cg33061487	3674444	AAATACTTACTATTCTCAAAAATAACTTAACTTAAATTCTCAAAAATCAC						cg	F	T	C	II	1	15	9283300	Mus musculus	mm10	AaTaCTTaCTaTTCTCAaAAATaACTTaaCTTAAaTTCTCAaAAaTCACr	AGGTTAGAAGAAGGGGTTAGTTCTCCTGGAACTAGAGTTTCATATGGTTCTGAGCCATCA[CG]TGACTTCTGAGAACTTAAGCCAAGTCATTTCTGAGAACAGCAAGCACTCTTAACTGCCAA	AGGTTAGAAGAAGGGGTTAGTTCTCCTGGAACTAGAGTTTCATATGGTTCTGAGCCATCA[CG]TGACTTCTGAGAACTTAAGCCAAGTCATTTCTGAGAACAGCAAGCACTCTTAACTGCCAA	GRCm10															FALSE	Ugt3a1	NM_207216.2	chr15	9279828	9315038	35211	+
0.513893	0.0577954	8.08968	7.49954e-07	0.000962215	6.16204	cg46670363	51777559	TACTATTAACCATTACCCCAATACTTCCTTACAACATCTTCAAAAAAACA	89755910	TACTATTAACCATTACCCCAATACTTCCTTACAACGTCTTCAAAAAAACG	A	Red	R	cg	F	T	C	I	1	9	44251541	Mus musculus	mm10	TaCTaTTAACCATTACCCCAATaCTTCCTTaCAaCrTCTTCAAaAAaaCr	AGAGTAGGGACAAGGTTCATTATAACCAGCTGACCCTCCCACCTGCCCCCTCCCGAGTCA[CG]CCTTCTTGAAGACGCTGCAAGGAAGCATTGGGGTAATGGTTAACAGCAATGGGACTTATT	AGAGTAGGGACAAGGTTCATTATAACCAGCTGACCCTCCCACCTGCCCCCTCCCGAGTCA[CG]CCTTCTTGAAGACGCTGCAAGGAAGCATTGGGGTAATGGTTAACAGCAATGGGACTTATT	GRCm10		chr9:44253261-44253463													FALSE	Pdzd3	NM_133226.2	chr9	44251464	44251664	201	-
0.645543	-0.982218	8.08584	7.54362e-07	0.000962551	6.15663	cg46940772	58608432	TACTATTAAAACAAACTCTCATATAATCCAAATTACCTTAAAATCTCTTC						cg	R	B	C	II	1	9	71765973	Mus musculus	mm10	ACTaTTaAaACAaaCTCTCATaTAaTCCAaaTTACCTTAaAATCTCTTCr	AATATTGTTATTACTGTTGAGACAGGCTCTCATGTAGTCCAGGTTACCTTAGAATCTCTT[CG]GAGCAGAGTGTGACCTTGAACTTTTCTGATCCTCTTGACCCCACTTGCCAGGTGCTGGGT	AATATTGTTATTACTGTTGAGACAGGCTCTCATGTAGTCCAGGTTACCTTAGAATCTCTT[CG]GAGCAGAGTGTGACCTTGAACTTTTCTGATCCTCTTGACCCCACTTGCCAGGTGCTGGGT	GRCm10															FALSE	Cgnl1	NM_001304362.1	chr9	71626506	71771602	145097	-
0.790549	-2.67793	8.08079	7.60212e-07	0.000962551	6.1495	cg28379600	94696377	RTATAAACTCTATAAAACTACCTCTCTACCAAACCTACAAAAAAAATTTC						cg	R	B	C	II	1	10	40629836	Mus musculus	mm10	TaTAAaCTCTaTaaAACTaCCTCTCTaCCAAaCCTaCAaaaaAAaTTTCr	GAGAGAGGCACGTGTAAGCTCTGTGGAACTGCCTCTCTGCCAAGCCTGCAGGGGAAGTTT[CG]TCCTCTATGACCTGTCTTTGTCTGGCTTTCAAGAACTTCAGCTTGCCACCAGCCTGGAGT	GAGAGAGGCACGTGTAAGCTCTGTGGAACTGCCTCTCTGCCAAGCCTGCAGGGGAAGTTT[CG]TCCTCTATGACCTGTCTTTGTCTGGCTTTCAAGAACTTCAGCTTGCCACCAGCCTGGAGT	GRCm10															FALSE	Ddo	NM_001316719.1	chr10	40629810	40630010	201	+
0.700216	-0.68851	8.08071	7.60309e-07	0.000962551	6.14938	cg43640497	40740423	CAAAAACTCAAACTTAAAACAAACCCTCCRTTAATTAATATATAACTACC						cg	R	B	C	II	1	6	85252426	Mus musculus	mm10	AaaAaCTCAAaCTTaaAaCAaaCCCTCCrTTAATTaATaTaTaaCTaCCr	TTAATTGTGTTCAGGAGCTCAAGCTTGGAGCAGGCCCTCCGTTAATTGATGTGTGGCTGC[CG]GGCGGTGGAAGTTAATGGTTTGGGAAGCTGGGCAAACAGTGCCATTAAAGGTCAACAGAG	TTAATTGTGTTCAGGAGCTCAAGCTTGGAGCAGGCCCTCCGTTAATTGATGTGTGGCTGC[CG]GGCGGTGGAAGTTAATGGTTTGGGAAGCTGGGCAAACAGTGCCATTAAAGGTCAACAGAG	GRCm10															FALSE	Sfxn5	NM_178639.4	chr6	85213050	85333422	120373	-
0.705366	2.58539	8.06319	7.80976e-07	0.000982269	6.12462	cg38230725	94771249	TTACTTAAAATAACRATCCTAAAAATCRCAAACAAACTATAAACACTCAC						mu	R	B	C	II	1	2	31500917	Mus musculus	mm10	TaCTTaAaATaaCraTCCTaaaaaTCrCAaaCAaACTaTaaACACTCACr	NNNNNNNNNNNNNNNNNNNNNNNNNNNNNNNNNNNNNNNNNNNNNNNNNNNNNNNNNNNN[NN]NNNNNNNNNNNNNNNNNNNNNNNNNNNNNNNNNNNNNNNNNNNNNNNNNNNNNNNNNNNN	CAGGCCTGTGCTTGCTTGAGATGGCGGTCCTGGGGGTCGCAGGCAGACTGTGGACACTCA[CG]CAACTTCGTTCAGGTACATGAAGAGTTCCAGGGATGTGGTGCGGGTTGTGCCATCTTTGA	GRCm10															TRUE	Ass1	NM_007494.3	chr2	31470269	31520670	50402	+
0.612851	-0.115688	8.05924	7.85707e-07	0.000982269	6.11904	cg38454798	85645841	AAACTACAATTAAATATTTAAACCTCTCTAAACTTTAACACATAATAAAC						cg	R	B	C	II	1	2	62399647	Mus musculus	mm10	aaCTaCAaTTaaATaTTTAAACCTCTCTAAACTTTaaCACATaaTAaACr	ATCGACTCCAAGGGCTGCAGTTGGATGTTTAAACCTCTCTAAACTTTGGCACATGGTAGA[CG]CTCTGGGAGCCGACTTTGTGAACTGGTGGGAGTTTCTTAGGCCTTCTGGAGGTGTGAATC	ATCGACTCCAAGGGCTGCAGTTGGATGTTTAAACCTCTCTAAACTTTGGCACATGGTAGA[CG]CTCTGGGAGCCGACTTTGTGAACTGGTGGGAGTTTCTTAGGCCTTCTGGAGGTGTGAATC	GRCm10															FALSE	Dpp4	NM_010074.3	chr2	62330072	62412231	82160	-
0.646948	0.326266	8.05885	7.86184e-07	0.000982269	6.11848	cg32724134	26762599	TTTTACCCCACTTAACACTAAATTCTATAAACCTTCCTCAAAACACAATC						cg	R	B	C	II	1	14	78853048	Mus musculus	mm10	TTTACCCCACTTaaCACTAaaTTCTaTaAACCTTCCTCAaaACACAATCr	AGAACACTAACTTTTACCCCACTTGGCACTAGGTTCTGTGAACCTTCCTCAGGACACAAT[CG]CAATGTTAAAGTCAACTTGGACTTCAAGTTGAGCATACCTTTGTACTTTGAGTCCTACAC	AGAACACTAACTTTTACCCCACTTGGCACTAGGTTCTGTGAACCTTCCTCAGGACACAAT[CG]CAATGTTAAAGTCAACTTGGACTTCAAGTTGAGCATACCTTTGTACTTTGAGTCCTACAC	GRCm10														chr14:78849032-78849511	FALSE	Vwa8	NM_173758.3	chr14	78849177	79065272	216096	+
0.603461	0.359815	8.05073	7.96029e-07	0.000983425	6.10699	cg29928238	5797841	AAATACTATAATAACCTCTCCAAACTTATATTACRCTTTTACCTCCCAAC						cg	R	B	C	II	1	11	90650904	Mus musculus	mm10	aATACTaTAATAACCTCTCCAaaCTTaTaTTACrCTTTTaCCTCCCAACr	GATCGTACAGTGGATACTGTAATAACCTCTCCAGGCTTGTGTTACGCTTTTGCCTCCCAA[CG]ACTTCTTGCAGTCCCAATCCATCTCATCCAGCCCCAGATGATCCCAGAACAAACCCGAGC	GATCGTACAGTGGATACTGTAATAACCTCTCCAGGCTTGTGTTACGCTTTTGCCTCCCAA[CG]ACTTCTTGCAGTCCCAATCCATCTCATCCAGCCCCAGATGATCCCAGAACAAACCCGAGC	GRCm10															FALSE	Tom1l1	NM_028011.2	chr11	90645690	90687601	41912	-
0.537264	0.28063	8.05051	7.96297e-07	0.000983425	6.10668	cg31010300	22725854	ATTAATAAAATCAAACTCATTAATCTACATTCTTTAAACCCCTACATCCC						cg	F	T	C	II	1	12	99735427	Mus musculus	mm10	TTAaTAAAATCAAaCTCATTAATCTaCATTCTTTaAaCCCCTaCATCCCr	AACTTTCGAGTGTAATGCAGGAAAGATTACACAGTGCCAGGCGGGAGCGAGGAGTGTGAG[CG]GGATGCAGGGGCTCAAAGAATGCAGATTAATGAGCTTGATTTTACTAATGCAACCAAATA	AACTTTCGAGTGTAATGCAGGAAAGATTACACAGTGCCAGGCGGGAGCGAGGAGTGTGAG[CG]GGATGCAGGGGCTCAAAGAATGCAGATTAATGAGCTTGATTTTACTAATGCAACCAAATA	GRCm10															FALSE	Efcab11	NM_030172.2	chr12	99717530	99883442	165913	-
0.695884	0.678019	8.04955	7.97466e-07	0.000983425	6.10532	cg45266762	61787443	TCTACTACAAAATTATCTAATAAACRCTATACCTTCTATCTCTAATAACC						cg	F	T	C	II	1	7	140905790	Mus musculus	mm10	CTaCTACAaaaTTATCTAATAAaCrCTaTaCCTTCTaTCTCTaaTAACCr	CAAGGTTAGAAGTGCTGTGCTGAGAACCCCCACTAACAGGCTAATGACAGGCTGGGGATA[CG]GTTACCAGAGACAGAAGGCACAGCGCTTATTAGATAACCCTGTAGCAGAATGAGATTACC	CAAGGTTAGAAGTGCTGTGCTGAGAACCCCCACTAACAGGCTAATGACAGGCTGGGGATA[CG]GTTACCAGAGACAGAAGGCACAGCGCTTATTAGATAACCCTGTAGCAGAATGAGATTACC	GRCm10															FALSE	BC024386	NR_015583.1	chr7	140904563	140905863	1301	+
0.609924	-1.66549	8.04541	8.02545e-07	0.000983425	6.09946	cg40963439	84778145	ATCCCAAACATTCATAAAAAAACCTAAACATACATACCTATAACTTCAAC						cg	R	B	C	II	1	4	62435289	Mus musculus	mm10	TCCCAAACATTCATaaAAAAACCTaaaCATaCATaCCTaTAaCTTCAaCr	CCTGCATTCAAATCCCAAACATTCATGGAAAAACCTGGGCATGCATGCCTGTAGCTTCAG[CG]CTGGAGGGGGTGAAGGGTGGAGACTGGCAGGTCCTGGGAGCCTGCCAGCCAGCCTAGCCC	CCTGCATTCAAATCCCAAACATTCATGGAAAAACCTGGGCATGCATGCCTGTAGCTTCAG[CG]CTGGAGGGGGTGAAGGGTGGAGACTGGCAGGTCCTGGGAGCCTGCCAGCCAGCCTAGCCC	GRCm10															FALSE	Rnf183	NM_153504.3	chr4	62434926	62436226	1301	-
0.553992	-0.643029	8.044	8.04294e-07	0.000983425	6.09745	cg42393084	17761497	TTCCTTAATCTTTATATCTTAAATCTTACCAATAAAACAAAAAATCAACC						cg	F	T	C	II	1	5	89219091	Mus musculus	mm10	TCCTTAATCTTTATaTCTTaAaTCTTaCCAaTAAAACAaAaAaTCAaCCr	ATAACTGGCTTCCCAGGCTGGGGAGGTGGCGGTCCCTGAGTTTCTACAATGGAAACGCTG[CG]GCTGACTCTCTGTTTTACTGGCAAGACTCAAGACATAAAGATTAAGGAAAGTTCACTGCT	ATAACTGGCTTCCCAGGCTGGGGAGGTGGCGGTCCCTGAGTTTCTACAATGGAAACGCTG[CG]GCTGACTCTCTGTTTTACTGGCAAGACTCAAGACATAAAGATTAAGGAAAGTTCACTGCT	GRCm10															TRUE	Slc4a4	NM_001197147.1	chr5	88887259	89239656	352398	+
-0.769396	3.85407	-8.03331	8.17598e-07	0.000995437	6.08229	cg40161053	51690235	CTCCAAATCTTAACACAAAATCCCTAATACTAATTAACACTACTCATACA	52753927	CTCCAAATCTTAACGCAAAATCCCTAATACTAATTAACGCTACTCATACG	T	Red	R	cg	R	B	C	I	1	3	107468307	Mus musculus	mm10	CTCCAAaTCTTaaCrCAaaaTCCCTAaTaCTaaTTaaCrCTaCTCATACr	TGAGGGCTGGGTCTCCAAGTCTTGGCGCAGGGTCCCTAGTGCTGGTTGGCGCTGCTCATA[CG]GTGCCTACCAGGAGACAAGGGGTTTCCGGGGCTGAGTCATTCGAGTTGGGGCAGTGCAGA	TGAGGGCTGGGTCTCCAAGTCTTGGCGCAGGGTCCCTAGTGCTGGTTGGCGCTGCTCATA[CG]GTGCCTACCAGGAGACAAGGGGTTTCCGGGGCTGAGTCATTCGAGTTGGGGCAGTGCAGA	GRCm10															FALSE	Slc6a17	NM_001293689.1	chr3	107467547	107518018	50472	-
1.1094	-2.7526	8.02607	8.26729e-07	0.000997608	6.07203	cg40050820	87776466	ATCCTTAAACTAAAATACTAACTAACCTATAACATACCRAAAAAAATTTC						cg	R	B	C	II	1	3	95318738	Mus musculus	mm10	TCCTTaAaCTaaAATACTaACTaaCCTaTaACATaCCrAaAaaaATTTCr	AAGAGGGTAAAGTCCTTGAGCTGGAATACTGACTGGCCTGTGACATGCCGAGAGGGATTT[CG]CAAGTGCTTCTGTGAAAGGTGGAGGCGGGGCTGTTGAAAGAGCCAACCAGACCCAGGACC	AAGAGGGTAAAGTCCTTGAGCTGGAATACTGACTGGCCTGTGACATGCCGAGAGGGATTT[CG]CAAGTGCTTCTGTGAAAGGTGGAGGCGGGGCTGTTGAAAGAGCCAACCAGACCCAGGACC	GRCm10														chr3:95315012-95315693	FALSE	Cers2	NM_029789.2	chr3	95315189	95323599	8411	+
0.639164	0.179684	8.02488	8.28254e-07	0.000997608	6.07032	cg30123594	26672152	ATCCTAACACAAAAAACTACTAAAATCAATAAAATCAAACTCATAATCCC						cg	R	B	C	II	1	11	107463717	Mus musculus	mm10	TCCTaaCACAaaaAaCTACTaAaATCAaTAAaATCAAACTCATaaTCCCr	GCCTGTGAGCGATCCTGGCACAGGGAGCTACTGAGATCAGTAAGATCAAACTCATGGTCC[CG]GCCTTGGCTCCTCTCAACTAGGAACAGTCAAAAAATTAAAAAGGAGTCTTTAGCCTTCAT	GCCTGTGAGCGATCCTGGCACAGGGAGCTACTGAGATCAGTAAGATCAAACTCATGGTCC[CG]GCCTTGGCTCCTCTCAACTAGGAACAGTCAAAAAATTAAAAAGGAGTCTTTAGCCTTCAT	GRCm10															FALSE	Pitpnc1	NM_145823.2	chr11	107207891	107470720	262830	-
0.481925	0.149312	8.02363	8.29841e-07	0.000997608	6.06856	cg34537219	79762276	CTATATCTCAAAAATAACAATAAATTTCCACAAACAACAAAACTATTCCA	38713940	CTATATCTCAAAAATAACAATAAATTTCCACAAACGACGAAACTATTCCG	T	Red	R	cg	R	B	C	I	1	16	95291458	Mus musculus	mm10	CTaTATCTCAAaAaTAaCAATaAATTTCCACAaaCraCraaACTATTCCr	TTTTACCTAACTCTGTATCTCAAGAGTAGCAATGAATTTCCACAGGCGGCGGGACTATTC[CG]GACTCTTCCCCTCAACTGTGCGCTGTTTACTTCCTCTGCGCTTCCCCTTCCTGCCTCCTG	TTTTACCTAACTCTGTATCTCAAGAGTAGCAATGAATTTCCACAGGCGGCGGGACTATTC[CG]GACTCTTCCCCTCAACTGTGCGCTGTTTACTTCCTCTGCGCTTCCCCTTCCTGCCTCCTG	GRCm10															FALSE	Kcnj15	NM_001039056.2	chr16	95257557	95300260	42704	+
0.846037	-0.380131	8.01621	8.39362e-07	0.00100483	6.05801	cg38362438	14610169	ACAAACAAAAACTTATTAATATTTTTAACTTCATCAAAAACAACTCCCTC						cg	R	B	C	II	1	2	49700518	Mus musculus	mm10	CAaACAAAaACTTaTTaATATTTTTAaCTTCATCAAaAACAaCTCCCTCr	CATTTCCAAGAGCAGACAAAGACTTGTTGATATTTTTAGCTTCATCAAGAACAGCTCCCT[CG]GCACCGGTTTTGCTGACCTACGAACGGACAGAAAAGGCAGTGAGGACTGTGTGAGCACAG	CATTTCCAAGAGCAGACAAAGACTTGTTGATATTTTTAGCTTCATCAAGAACAGCTCCCT[CG]GCACCGGTTTTGCTGACCTACGAACGGACAGAAAAGGCAGTGAGGACTGTGTGAGCACAG	GRCm10															FALSE	Kif5c	NM_008449.2	chr2	49619313	49774778	155466	+
0.610287	-0.586466	8.01097	8.46151e-07	0.00100874	6.05056	cg39826909	37738943	TAAATACAAAACTATACAACCATATAACCTACACATACCTTACCTAAACC						cg	R	B	C	II	1	3	63439120	Mus musculus	mm10	AaaTACAAaACTaTaCAACCATaTAACCTaCACATACCTTACCTaAACCr	GGTGTAAAGTATAGGTACAAGACTGTGCAACCATGTAACCTGCACATACCTTACCTGAAC[CG]CATGGTTTGTTTATAGATAATATGTTAATATAGTTAATGTGTAACAGGTAACATTATTGT	GGTGTAAAGTATAGGTACAAGACTGTGCAACCATGTAACCTGCACATACCTTACCTGAAC[CG]CATGGTTTGTTTATAGATAATATGTTAATATAGTTAATGTGTAACAGGTAACATTATTGT	GRCm10															FALSE	.	.	.	.	.	.	.
0.618289	0.529244	8.00169	8.58314e-07	0.00101899	6.03737	cg31797249	20750497	ACCAAAATTAAACAACACAAACCTCACCATAATAATCRCTAAACTAAACC						cg	F	T	C	II	1	13	73700653	Mus musculus	mm10	CCAaaaTTaaaCAaCACAAaCCTCACCATaaTaaTCrCTaaaCTaaaCCr	GGAGCTCCTGGACACAACCACTTGCCCTTTGGCTGCCGAGCTGCCCGAGTGTGCCAGGCC[CG]GCCCAGCCCAGCGACCACCATGGTGAGGCTTGTGCTGCCCAACCCTGGCCTAGAGGAGCG	GGAGCTCCTGGACACAACCACTTGCCCTTTGGCTGCCGAGCTGCCCGAGTGTGCCAGGCC[CG]GCCCAGCCCAGCGACCACCATGGTGAGGCTTGTGCTGCCCAACCCTGGCCTAGAGGAGCG	GRCm10															FALSE	Slc6a19	NM_028878.3	chr13	73681156	73700695	19540	-
0.618446	-0.391548	7.99501	8.67197e-07	0.00102528	6.02785	cg28817342	9668448	ATTTCAAAATTTAAAAAATCCAATTCAAATTAATCTTCACCACAACCACC						cg	R	B	C	II	1	10	89506555	Mus musculus	mm10	TTTCAaaaTTTAaAAAATCCAATTCAaATTAaTCTTCACCACAaCCACCr	ATGGTGATGCAGTTTCAGGGTTTAGAAAATCCAATTCAGATTAGTCTTCACCACAGCCAC[CG]GCTGTCAGGATTTGTGCCGGAAGGGATGAGTGTGAAGCCAGCTAAAGGTAGGTCACTACA	ATGGTGATGCAGTTTCAGGGTTTAGAAAATCCAATTCAGATTAGTCTTCACCACAGCCAC[CG]GCTGTCAGGATTTGTGCCGGAAGGGATGAGTGTGAAGCCAGCTAAAGGTAGGTCACTACA	GRCm10															FALSE	Nr1h4	NM_001163700.1	chr10	89454233	89506658	52426	-
-1.24815	3.70351	-7.9847	8.81083e-07	0.00103423	6.01316	cg38377779	9607890	AAACATCTCCAAATTTAAATACAAACTAAAACTACAATCTCAATATATCC						cg	F	T	C	II	1	2	51732416	Mus musculus	mm10	AACATCTCCAaATTTAaaTACAAACTaAAACTACAATCTCAaTATATCCr	CCAGTCCTCTGCAAGGAGCAAGTGCTCTTAACCTCTGCAGCCTAAATGTGCACAGTAGAT[CG]GATATACTGAGATTGTAGTTTCAGTTTGTACCTAAATCTGGAGATGTTTGTGATACAATA	CCAGTCCTCTGCAAGGAGCAAGTGCTCTTAACCTCTGCAGCCTAAATGTGCACAGTAGAT[CG]GATATACTGAGATTGTAGTTTCAGTTTGTACCTAAATCTGGAGATGTTTGTGATACAATA	GRCm10															FALSE	Gm13490	NR_040639.1	chr2	51732209	51733509	1301	-
0.678797	0.879566	7.98403	8.81995e-07	0.00103423	6.0122	cg34833587	51622153	TTCTACATCTAAATCAAAACAATTAAAATCTTACTCTATTTTTAACTCCA	59745938	TTCTACATCTAAATCAAAACAATTAAAATCTTACTCTATTTTTAACTCCG	A	Red	R	cg	F	T	C	I	1	17	31588473	Mus musculus	mm10	TTCTaCATCTaaaTCAaAaCAaTTaaaATCTTaCTCTaTTTTTAACTCCr	TAGCAGCACTGTTTATGTATTCTGTAACAGAACTTCGTCTTTTACAGATGCAGGTGGTCA[CG]GAGTTAAAAACAGAGCAAGATCCCAACTGCTCTGACCCAGATGCAGAAGGAGTGAGTCCT	TAGCAGCACTGTTTATGTATTCTGTAACAGAACTTCGTCTTTTACAGATGCAGGTGGTCA[CG]GAGTTAAAAACAGAGCAAGATCCCAACTGCTCTGACCCAGATGCAGAAGGAGTGAGTCCT	GRCm10															FALSE	Pknox1	NM_016670.3	chr17	31564772	31607693	42922	+
0.554155	1.40462	7.98112	8.85955e-07	0.00103464	6.00806	cg42924521	79692429	CCTAAAATATTTACTAATCCTCRAATACTATCTACTTTAATCTTCCACTC						cg	R	B	C	II	1	5	138092805	Mus musculus	mm10	CTaaaaTaTTTaCTAaTCCTCraaTaCTaTCTACTTTaaTCTTCCACTCr	CCAGAAGGCAGCCTGGGGTGTTTGCTAGTCCTCGGGTGCTGTCTACTTTGGTCTTCCACT[CG]CCCAGAGCTTACGGAGAGTGCTAGACTGGCAGGCCTGTGAGCCTAGGGATCCACTATTTT	CCAGAAGGCAGCCTGGGGTGTTTGCTAGTCCTCGGGTGCTGTCTACTTTGGTCTTCCACT[CG]CCCAGAGCTTACGGAGAGTGCTAGACTGGCAGGCCTGTGAGCCTAGGGATCCACTATTTT	GRCm10															FALSE	Zkscan1	NM_029869.1	chr5	138085083	138107822	22740	+
0.531828	0.0421817	7.96848	9.03403e-07	0.00104782	5.99001	cg36129958	79669371	AAATTAAAATAACTACACACATAAATTCATTTAAATCCTCACAACCCTCC						cg	F	T	C	II	1	19	8596865	Mus musculus	mm10	aATTaaAATAaCTaCACACATaAATTCATTTAAATCCTCACAaCCCTCCr	GGCTAGTGATCTGTCTTTCTGTTTCCTCATCTATGCAAACAGGATAATCAAGGTGGAAGT[CG]GAGGGCTGTGAGGATTTAAATGAATTCATGTGTGCAGCTATTCCAATCTGCTATCTAGGA	GGCTAGTGATCTGTCTTTCTGTTTCCTCATCTATGCAAACAGGATAATCAAGGTGGAAGT[CG]GAGGGCTGTGAGGATTTAAATGAATTCATGTGTGCAGCTATTCCAATCTGCTATCTAGGA	GRCm10															FALSE	Slc22a8	NM_001164634.1	chr19	8591253	8611835	20583	+
0.674522	3.80514	7.96642	9.06286e-07	0.00104782	5.98707	cg39146682	98600434	TAAATATACTCATAAAAAACTATACACACATCRCTTCTCRATATAAACTC						cg	R	B	C	II	1	2	155100071	Mus musculus	mm10	aAaTaTaCTCATAAAAaaCTATaCACACATCrCTTCTCraTaTaaACTCr	AGATGTGGACTTGAGTGTGCTCATAAAAGGCTATGCACACATCGCTTCTCGGTGTGGACT[CG]GCGTGTCAAAGGGAACCCGGATTTTAGCTCCAGCTCTGTGGTTGTTAGTAATATGGGACC	AGATGTGGACTTGAGTGTGCTCATAAAAGGCTATGCACACATCGCTTCTCGGTGTGGACT[CG]GCGTGTCAAAGGGAACCCGGATTTTAGCTCCAGCTCTGTGGTTGTTAGTAATATGGGACC	GRCm10															FALSE	2310005A03Rik	NR_040634.1	chr2	155097790	155100079	2290	-
1.10681	-0.0745532	7.96494	9.08357e-07	0.00104782	5.98495	cg29955071	56793442	TCTTTTCTCTCTATTTTCTTTTTAATACTTTTAATTACACATAAAAAACA	91663314	TCTTTTCTCTCTATTTTCTTTTTAATACTTTTAATTACACATAAAAAACG	T	Red	R	cg	R	B	C	I	1	11	94591339	Mus musculus	mm10	TCTTTTCTCTCTaTTTTCTTTTTaATACTTTTAaTTACACATaaaaaaCr	GGTTTACATTTCTCTTTTCTCTCTGTTTTCTTTTTGATACTTTTAGTTACACATGGGGGG[CG]GGGGGGGGGGGGAGAAGGTTGAAGAGGATGCTGGGTTTGATGGAGCTGGAATTACAGGCA	GGTTTACATTTCTCTTTTCTCTCTGTTTTCTTTTTGATACTTTTAGTTACACATGGGGGG[CG]GGGGGGGGGGGGAGAAGGTTGAAGAGGATGCTGGGTTTGATGGAGCTGGAATTACAGGCA	GRCm10															FALSE	Acsf2	NM_153807.2	chr11	94557101	94601786	44686	-
-0.797563	1.07451	-7.96242	9.11895e-07	0.00104782	5.98136	cg29882746	44639398	CAATCCTAATCAAAATTACAAAAACCCACTATACTTCCTAATTCAAAACA	41747976	CAATCCTAATCAAAATTACAAAAACCCACTATACTTCCTAATTCAAAACG	A	Red	R	cg	F	T	C	I	1	11	86579286	Mus musculus	mm10	CAATCCTaATCAAAaTTACAaAAACCCACTaTaCTTCCTaaTTCAaaaCr	CTCCAAGCACCTCTACTCTGCCCATTGCACCGTCCCCTTCCCACAGAGACCTCTCTGATA[CG]CCCTGAACCAGGAAGCACAGTGGGTTTCTGTAACTTTGATCAGGATTGCTTGCTTTGTAC	CTCCAAGCACCTCTACTCTGCCCATTGCACCGTCCCCTTCCCACAGAGACCTCTCTGATA[CG]CCCTGAACCAGGAAGCACAGTGGGTTTCTGTAACTTTGATCAGGATTGCTTGCTTTGTAC	GRCm10															FALSE	.	.	.	.	.	.	.
0.664361	0.961931	7.95221	9.26388e-07	0.00105688	5.96676	cg29465101	2711116	AATACATTAAATAAACTATCAACTACAACAATTCCCTTTCAAAATTTATC						cg	R	B	C	II	1	11	44512321	Mus musculus	mm10	aTaCATTAAaTaAACTaTCAaCTACAACAaTTCCCTTTCAaAaTTTATCr	TTACCAGGGCAAGTGCATTAAGTGAACTGTCAGCTACAACAGTTCCCTTTCAGAGTTTAT[CG]GCGCACAGCCCCATTTGTGAGGTGAGGAACATGTGTACAGGCTTCCTTTCTCAAGTCCAA	TTACCAGGGCAAGTGCATTAAGTGAACTGTCAGCTACAACAGTTCCCTTTCAGAGTTTAT[CG]GCGCACAGCCCCATTTGTGAGGTGAGGAACATGTGTACAGGCTTCCTTTCTCAAGTCCAA	GRCm10															FALSE	.	.	.	.	.	.	.
0.736137	0.403349	7.95111	9.27969e-07	0.00105688	5.96519	cg32050473	37666332	RACTCTCAATAATTTAAATACCACTAACTACTTCCAATATTAATACTCTC						cg	R	B	C	II	1	13	108860110	Mus musculus	mm10	aCTCTCAaTAaTTTaaATaCCACTaaCTaCTTCCAATaTTaaTaCTCTCr	CTCCATGGTGCGGCTCTCAGTAGTTTGGATGCCACTGGCTGCTTCCAATGTTGGTGCTCT[CG]CTGCAACTGTTACTCACTCAGAGGCAACTGAAATGCTGGAGAAAAAGGCAAGGAAAGGTT	CTCCATGGTGCGGCTCTCAGTAGTTTGGATGCCACTGGCTGCTTCCAATGTTGGTGCTCT[CG]CTGCAACTGTTACTCACTCAGAGGCAACTGAAATGCTGGAGAAAAAGGCAAGGAAAGGTT	GRCm10															FALSE	Pde4d	NM_011056.3	chr13	108654176	109955969	1301794	+
0.752014	0.452579	7.9491	9.30858e-07	0.00105688	5.96231	cg38604539	58689591	TACTAACCTATCCTCCTCTATCATATAAAAATACACCACRATTTACTACC						cg	F	T	C	II	1	2	79660477	Mus musculus	mm10	ACTAACCTaTCCTCCTCTaTCATATaAaaaTACACCACraTTTaCTaCCr	GTGAGGCGGAGCCTGAATCTGTTCAGAACGCAGATGATGGACTTGGAGCTGGCCATGCTG[CG]GCAGCAAACCGTGGTGTACCCTCATATGACAGAGGAGGACAGGTTAGTACAGTCAGAGCC	GTGAGGCGGAGCCTGAATCTGTTCAGAACGCAGATGATGGACTTGGAGCTGGCCATGCTG[CG]GCAGCAAACCGTGGTGTACCCTCATATGACAGAGGAGGACAGGTTAGTACAGTCAGAGCC	GRCm10															FALSE	Ssfa2	NM_080558.4	chr2	79635424	79672966	37543	+
0.513306	0.583844	7.94183	9.41384e-07	0.0010646	5.9519	cg30220249	95745347	AAATATTTAATAAACTACAATATAAACRAAACACATCACCTACCCATAAC						cg	F	T	C	II	1	11	115971313	Mus musculus	mm10	AaTaTTTAATaAaCTaCAATaTaAACrAaACACATCACCTaCCCATaaCr	AGCACATCCCTGGAGAATGCAGTACAGCTCATGCGGGAGAGCCAGGATCTGGATGCTGCT[CG]CCATGGGCAGGTGATGTGTCTCGTTCACATTGCAGCTCATTAAACACTTGTAAACTAAGC	AGCACATCCCTGGAGAATGCAGTACAGCTCATGCGGGAGAGCCAGGATCTGGATGCTGCT[CG]CCATGGGCAGGTGATGTGTCTCGTTCACATTGCAGCTCATTAAACACTTGTAAACTAAGC	GRCm10	chr11:115974662-115975209														FALSE	.	.	.	.	.	.	.
3.49468	0.851298	7.93447	9.52156e-07	0.00107255	5.94136	cg34909936	93763849	TTATCCCRACRATATAATAATCTATTAACCRAAATAAATCTTAAAAACTC						cg	R	B	C	II	1	17	39845232	Mus musculus	mm10	TaTCCCrACraTaTaaTaaTCTaTTaaCCrAaaTaAaTCTTaaaaaCTCr	AGCAGTGGTCATTGTCCCGACGGTGTGGTGGTCTGTTGGCCGAGGTGAGTCTTGGGGGCT[CG]TCCGGCCCTGTCGTCCTTCGGGAAGGCGCGTGTTGGGGCCTGCCGGAGTGCCGAGGTGGG	AGCAGTGGTCATTGTCCCGACGGTGTGGTGGTCTGTTGGCCGAGGTGAGTCTTGGGGGCT[CG]TCCGGCCCTGTCGTCCTTCGGGAAGGCGCGTGTTGGGGCCTGCCGGAGTGCCGAGGTGGG	GRCm10	chr17:39848220-39848823		chr17:39843168-39846346	chr17	39843168	39846346	3178	360	2199	22.7	69.2	0.95			TRUE	.	.	.	.	.	.	.
1.06609	-1.32219	7.92766	9.62254e-07	0.0010765	5.9316	cg42453630	87762355	AATTTAACAACCAAATACAAACTAACAAATTATCCCAACATCTACTAACA	10628410	AATTTAACGACCAAATACGAACTAACAAATTATCCCGACATCTACTAACG	T	Red	R	cg	R	B	C	I	1	5	97935444	Mus musculus	mm10	aaTTTaaCraCCAaaTaCrAaCTAaCAaaTTaTCCCrACATCTaCTaaCr	CTGGGAGTCGCTGGTTTGGCGGCCAGGTGCGAGCTAGCAGGTTGTCCCGACATCTGCTGG[CG]GCCGCGCTGCCGATTGTCAGCGGAGGTAGTTGAGAGCGGCAGGACCGTTTTTTGGTCTCG	CTGGGAGTCGCTGGTTTGGCGGCCAGGTGCGAGCTAGCAGGTTGTCCCGACATCTGCTGG[CG]GCCGCGCTGCCGATTGTCAGCGGAGGTAGTTGAGAGCGGCAGGACCGTTTTTTGGTCTCG	GRCm10			chr5:97935377-97935758	chr5	97935377	97935758	381	36	243	18.9	63.8	0.97			FALSE	Antxr2	NM_133738.1	chr5	97884687	98030962	146276	-
0.803638	-3.21422	7.92703	9.63194e-07	0.0010765	5.93069	cg29854992	28746978	TACTAAAAACCTTAAACTTCCAAACCACTAAAAACAAACCTACCATCTTC						cg	R	B	C	II	1	11	83849331	Mus musculus	mm10	aCTaAaAACCTTAAaCTTCCAAACCACTaaaAACAaaCCTaCCATCTTCr	TAATGCCCGGATGCTGAGAACCTTAAGCTTCCAAACCACTGGGAACAGGCCTGCCATCTT[CG]CAGACAGGGGAAGTGTGTACACAGGTGTTAGCCAGCTTTGCACAGGTGGTCTTCTTCCGT	TAATGCCCGGATGCTGAGAACCTTAAGCTTCCAAACCACTGGGAACAGGCCTGCCATCTT[CG]CAGACAGGGGAAGTGTGTACACAGGTGTTAGCCAGCTTTGCACAGGTGGTCTTCTTCCGT	GRCm10	chr11:83852036-83852340	chr11:83851151-83851457													FALSE	.	.	.	.	.	.	.
1.07429	-3.62635	7.91259	9.84986e-07	0.00109658	5.90997	cg29185931	13657938	TATTACACCCCAAAAAACTAAATACAACTTCTATACCTCTTAAACAAACA	98643594	TATTACGCCCCAAAAAACTAAATACAACTTCTATACCTCTTAAACAAACG	T	Red	R	cg	R	B	C	I	1	11	3983563	Mus musculus	mm10	TATTaCrCCCCAaaaAaCTaAATACAaCTTCTaTaCCTCTTaaaCAaaCr	GCGGGGGCGCAATATTGCGCCCCAGGGAGCTGAATACAGCTTCTGTGCCTCTTGGGCAGG[CG]GCGCAGGGGAGAGGACGGGAAGGGGGTGGGGGGGGGGAGGGGGCCGTGGCGCCCATTGGC	GCGGGGGCGCAATATTGCGCCCCAGGGAGCTGAATACAGCTTCTGTGCCTCTTGGGCAGG[CG]GCGCAGGGGAGAGGACGGGAAGGGGGTGGGGGGGGGGAGGGGGCCGTGGCGCCCATTGGC	GRCm10															FALSE	Gal3st1	NM_001177703.1	chr11	3983435	3983635	201	+
0.590494	-0.484225	7.90875	9.90877e-07	0.00109886	5.90445	cg46986073	23796421	TCAAATTTCCTCCTTCATCAATCAAAACAAAAAATCCTCCTAATAAAAAC						cg	F	T	C	II	1	9	77546039	Mus musculus	mm10	CAAATTTCCTCCTTCATCAATCAAaACAAaAaATCCTCCTaATAaAaACr	TATTTTTAACTGCACAGGGCACTTGCCCAGGGGGAGAGGGGGAGAGATACATAAAGGTTT[CG]TCTCTATCAGGAGGATCTCTTGTCTTGATTGATGAAGGAGGAAATTTGACCTGTTTTTAC	TATTTTTAACTGCACAGGGCACTTGCCCAGGGGGAGAGGGGGAGAGATACATAAAGGTTT[CG]TCTCTATCAGGAGGATCTCTTGTCTTGATTGATGAAGGAGGAAATTTGACCTGTTTTTAC	GRCm10													chr9:77544402-77545329		FALSE	Lrrc1	NM_001146048.1	chr9	77545052	77546352	1301	-
0.589658	-0.810008	7.90155	1.002e-06	0.00110436	5.8941	cg31494418	80790176	ATAATAACACTACAAAAAACCTCRAAATACCTCAATTTAATAAACCTTCC						cg	F	T	C	II	1	13	42346688	Mus musculus	mm10	TAATAaCACTaCAaaaaaCCTCrAaATaCCTCAaTTTaATAaaCCTTCCr	GTCTCAGTGGGGGGCCACCCTAAAGTCATGAGTTGCTGGGAAACCGAGGAGGATAGTATC[CG]GAAGGCCTATCAAACTGAGGCATCTCGAGGCCCCCTGCAGTGCTATTACCATGAAGCAAT	GTCTCAGTGGGGGGCCACCCTAAAGTCATGAGTTGCTGGGAAACCGAGGAGGATAGTATC[CG]GAAGGCCTATCAAACTGAGGCATCTCGAGGCCCCCTGCAGTGCTATTACCATGAAGCAAT	GRCm10															FALSE	.	.	.	.	.	.	.
0.608629	-1.1624	7.89993	1.00453e-06	0.00110436	5.89177	cg37926076	39682888	CCAATCAAATTAAATACCTAAAAAACTTTCAAAAATAATAAACCACCCTC						cg	F	T	C	II	1	1	187663238	Mus musculus	mm10	CAaTCAaaTTaaaTACCTAAAAAaCTTTCAaAaaTAATAaACCACCCTCr	GCTGCCAGGTGAAAGAAATGTTCAGGTCTCTGGGGGAAGGCGGGTAGCGAATTTGCTTGT[CG]AGGGTGGTCTATTACCTCTGAAAGCTTTTTAGGTACCCAACCTGACTGGCTGTCAGAAGG	GCTGCCAGGTGAAAGAAATGTTCAGGTCTCTGGGGGAAGGCGGGTAGCGAATTTGCTTGT[CG]AGGGTGGTCTATTACCTCTGAAAGCTTTTTAGGTACCCAACCTGACTGGCTGTCAGAAGG	GRCm10															FALSE	Esrrg	NM_001243792.1	chr1	187609005	188214884	605880	+
0.627141	-1.22356	7.89808	1.00742e-06	0.00110436	5.88911	cg36721716	2797562	AACAACATCTTATAATTTCAAAACATCCTTAACTTAAACATAATATACAC						cg	F	T	C	II	1	1	23261732	Mus musculus	mm10	ACAaCATCTTATAATTTCAaaaCATCCTTAACTTAaaCATAATaTaCACr	TTGTATAAAACTGTGTGTGTGTGTGTGTGTGTGTGTGTATGTGTGTGTGTGTGTATCTCA[CG]TGCACATTATGCCTAAGTTAAGGATGCCCTGAAATTATAAGATGCTGTTATCCATTGACC	TTGTATAAAACTGTGTGTGTGTGTGTGTGTGTGTGTGTATGTGTGTGTGTGTGTATCTCA[CG]TGCACATTATGCCTAAGTTAAGGATGCCCTGAAATTATAAGATGCTGTTATCCATTGACC	GRCm10															FALSE	.	.	.	.	.	.	.
0.569869	0.074808	7.89019	1.01984e-06	0.00111371	5.87775	cg34501238	3772345	ACRATACAAATAAACCCTCTACCCAACTATAACTTTCATACAAATAAATC						cg	R	B	C	II	1	16	92398112	Mus musculus	mm10	CraTaCAAATaaaCCCTCTaCCCAaCTaTaaCTTTCATaCAaaTaaATCr	TAAGATTGAACACGGTGCAAATGGGCCCTCTGCCCAGCTGTGGCTTTCATGCAGGTGGAT[CG]GCTCACCCTGGTGTTGTAAGGGCTGCTGAGAATTATGAAATATCATGAGCTCTTAGCATG	TAAGATTGAACACGGTGCAAATGGGCCCTCTGCCCAGCTGTGGCTTTCATGCAGGTGGAT[CG]GCTCACCCTGGTGTTGTAAGGGCTGCTGAGAATTATGAAATATCATGAGCTCTTAGCATG	GRCm10															FALSE	Rcan1	NM_019466.4	chr16	92391950	92400078	8129	-
0.649473	-1.45128	7.88506	1.02799e-06	0.00111834	5.87037	cg46893314	34669932	TCAAATATATATCACCTAATAACAAACAATTCTATAATAAATCATTCACC						cg	R	B	C	II	1	9	66769515	Mus musculus	mm10	CAAATATATaTCACCTaaTaaCAAaCAaTTCTATaaTAAATCATTCACCr	ACACAATACAGTCAAATATATGTCACCTGGTGGCAAGCAGTTCTATGGTAAATCATTCAC[CG]CAGCCAGGAATTTGGCCCCTGTTTGTGCCAAGTCATTAAGTAATGAAGTGGGGAGGAGTT	ACACAATACAGTCAAATATATGTCACCTGGTGGCAAGCAGTTCTATGGTAAATCATTCAC[CG]CAGCCAGGAATTTGGCCCCTGTTTGTGCCAAGTCATTAAGTAATGAAGTGGGGAGGAGTT	GRCm10															FALSE	.	.	.	.	.	.	.
0.687078	-1.80856	7.8826	1.03193e-06	0.00111837	5.86683	cg42331716	75680225	TTACCTTCTAAAAAAAACTACCTTATACRAAATATTCTTTTAAACAACTC						cg	R	B	C	II	1	5	77401074	Mus musculus	mm10	TaCCTTCTAaAAaAAACTaCCTTATACraaaTaTTCTTTTaaACAaCTCr	TCACTAGAGACTTGCCTTCTAGAAGAAACTGCCTTATACGGGGTGTTCTTTTGGACAGCT[CG]CCGACACAGTGCCCTTGGTTGGAGTCCAAGGGCAGCTGGCTTCTCTAAGTCTGGGTAGGG	TCACTAGAGACTTGCCTTCTAGAAGAAACTGCCTTATACGGGGTGTTCTTTTGGACAGCT[CG]CCGACACAGTGCCCTTGGTTGGAGTCCAAGGGCAGCTGGCTTCTCTAAGTCTGGGTAGGG	GRCm10															FALSE	Igfbp7	NM_001159518.1	chr5	77349239	77408045	58807	-
1.1673	-2.08265	7.87914	1.0375e-06	0.00111946	5.86184	cg34951594	38613488	ACAAACAATATATAAACAAAAACAACAACTCATCACTAAAACTCAAACCA	61608109	ACAAACGATATATAAACGAAAACAACAACTCGTCGCTAAAACTCAAACCG	G	Grn	G	cg	R	B	C	I	1	17	45545492	Mus musculus	mm10	aCAaACrATaTaTaAaCraaaaCAaCAaCTCrTCrCTaaaACTCAaaCCr	TGTTGACCCGCGGCAGACGATGTGTGAGCGGGGGCAGCAGCTCGTCGCTGGGACTCAGGC[CG]CCGCCCACGCTACTGGCCGAGCCCGGTCCCTCCAGACCAAAGAGCTTTTCCACGTGATAG	TGTTGACCCGCGGCAGACGATGTGTGAGCGGGGGCAGCAGCTCGTCGCTGGGACTCAGGC[CG]CCGCCCACGCTACTGGCCGAGCCCGGTCCCTCCAGACCAAAGAGCTTTTCCACGTGATAG	GRCm10	chr17:45549017-45549715	chr17:45546788-45547088	chr17:45544794-45545946	chr17	45544794	45545946	1152	126	793	21.9	68.8	0.93			FALSE	Tmem151b	NM_001013749.2	chr17	45541939	45549677	7739	-
0.671478	0.52006	7.87713	1.04075e-06	0.00111946	5.85894	cg29906411	6675551	CACTTCCCTAAACTTAAATAATAACTTCCRAACATATCCATTATCCCTAC						cg	R	B	C	II	1	11	88628587	Mus musculus	mm10	ACTTCCCTAAACTTAAaTaATaACTTCCrAaCATaTCCATTaTCCCTACr	TACTCCAATCTCACTTCCCTAAACTTAAGTGATGACTTCCGAGCATGTCCATTGTCCCTA[CG]TCCTAACTCCAAAGACACAGCTTATCTTCAGCTGCAAATCTGGACTCCTGAATTTGATCC	TACTCCAATCTCACTTCCCTAAACTTAAGTGATGACTTCCGAGCATGTCCATTGTCCCTA[CG]TCCTAACTCCAAAGACACAGCTTATCTTCAGCTGCAAATCTGGACTCCTGAATTTGATCC	GRCm10															FALSE	Msi2	NM_054043.3	chr11	88339381	88718229	378849	-
-0.830962	2.86353	-7.86681	1.05759e-06	0.00113331	5.84405	cg29295759	67606267	ACTATAACCTCCACATAAAATTTAACAATAATCATAAATACCACAATCAC						cg	R	B	C	II	1	11	19783764	Mus musculus	mm10	CTaTaACCTCCACATaaaATTTaaCAaTaaTCATAaaTaCCACAaTCACr	ATCAGGAGGCCACTGTGACCTCCACATGGGATTTGGCAGTGGTCATAGGTGCCACAGTCA[CG]GATGAGGCTGTGGCATTGGTTGAGACTGTGGGGCTCGTGGAGGTAAAGCTGACGACAAGC	ATCAGGAGGCCACTGTGACCTCCACATGGGATTTGGCAGTGGTCATAGGTGCCACAGTCA[CG]GATGAGGCTGTGGCATTGGTTGAGACTGTGGGGCTCGTGGAGGTAAAGCTGACGACAAGC	GRCm10															FALSE	.	.	.	.	.	.	.
0.599415	-0.111041	7.86149	1.06638e-06	0.00113846	5.83638	cg40963434	35754861	CTAATAAACATAAACAACAAATACCTAAATTCTTCAACAAACCAAACACC						cg	F	T	C	II	1	4	62435048	Mus musculus	mm10	TaaTAAaCATaAaCAaCAAaTaCCTaAATTCTTCAACAAaCCAaACACCr	AGTCCTGCCCTCACTACCTGTATTGATTCAGAAGCCACTGACTCTGGATACCTATCGGGT[CG]GTGTCTGGCTTGTTGAAGAATTCAGGCACTTGCTGCTCATGCTTACCAGGCCTCAGTCTG	AGTCCTGCCCTCACTACCTGTATTGATTCAGAAGCCACTGACTCTGGATACCTATCGGGT[CG]GTGTCTGGCTTGTTGAAGAATTCAGGCACTTGCTGCTCATGCTTACCAGGCCTCAGTCTG	GRCm10															FALSE	Rnf183	NM_153504.3	chr4	62434926	62436226	1301	-
0.7909	1.98724	7.85527	1.07676e-06	0.00114167	5.82739	cg29946450	70702544	ACCCATATTAAAATATTACAAATACCTTACAAATTAAAACAAATACTATC						cg	R	B	C	II	1	11	93888548	Mus musculus	mm10	CCCATATTaAAaTATTaCAAATaCCTTaCAaATTAaAaCAaATaCTaTCr	TTTATATGGAAGCCCATATTGAAGTATTGCAAATGCCTTGCAGATTAGAGCAGATGCTGT[CG]CAAATAAGTGACTGTTCTTAATGTCTCTGGTGAGCCAGGGTTTCTAGCCATTTTCTTTCA	TTTATATGGAAGCCCATATTGAAGTATTGCAAATGCCTTGCAGATTAGAGCAGATGCTGT[CG]CAAATAAGTGACTGTTCTTAATGTCTCTGGTGAGCCAGGGTTTCTAGCCATTTTCTTTCA	GRCm10													chr11:93884846-93886590		FALSE	Mbtd1	NM_134012.3	chr11	93886218	93946984	60767	+
1.18771	-1.21255	7.85445	1.07813e-06	0.00114167	5.82622	cg30064800	74754567	CCCAAACACACATAATATACAAAAATCACCAAAATAAACATAACATTACA	91691869	CCCAAACGCACATAATATACGAAAATCACCAAAATAAACATAACATTACG	T	Red	R	cg	R	B	C	I	1	11	102438334	Mus musculus	mm10	CCCAaaCrCACATAaTaTaCraaaATCACCAaaaTaaaCATaACATTaCr	CCCGCCTCTCCGCCCAGGCGCACATAGTGTGCGGGGATCACCAGGGTGGGCATGACATTG[CG]GTACACGTTGTCCTTGAGGTGGTCGATGGAACCGCAGAAAATGAGCTGGCCCGGTTGGCT	CCCGCCTCTCCGCCCAGGCGCACATAGTGTGCGGGGATCACCAGGGTGGGCATGACATTG[CG]GTACACGTTGTCCTTGAGGTGGTCGATGGAACCGCAGAAAATGAGCTGGCCCGGTTGGCT	GRCm10			chr11:102437373-102438878	chr11	102437373	102438878	1505	155	996	20.6	66.2	0.94			FALSE	Fam171a2	NM_199200.2	chr11	102436980	102447663	10684	-
0.701581	0.693036	7.85189	1.08244e-06	0.00114167	5.82252	cg40049078	74618533	AACTCTAACTCTTTAACTACCACCTTCCAAATATTAAACTATAACCATAC						cg	F	T	C	II	1	3	95195527	Mus musculus	mm10	ACTCTaACTCTTTaaCTaCCACCTTCCAAaTaTTaaaCTaTAACCATaCr	CCATTGTGCCTTGCTGAGTGTTTGGAACTGGAAACTTGAGGCTTGTATTAGCTATGAAAG[CG]CATGGTTACAGCCCAACACTTGGAAGGTGGCAGCCAAAGAGTCAGAGTTCAAAGTCATAC	CCATTGTGCCTTGCTGAGTGTTTGGAACTGGAAACTTGAGGCTTGTATTAGCTATGAAAG[CG]CATGGTTACAGCCCAACACTTGGAAGGTGGCAGCCAAAGAGTCAGAGTTCAAAGTCATAC	GRCm10															FALSE	Gabpb2	NM_029885.1	chr3	95181765	95217942	36178	-
0.54289	-0.537554	7.84895	1.08742e-06	0.00114167	5.81826	cg47263831	93638166	CAAAATCTACRTAAAAAAAATCCACCCACCAAAAAATATACTTAACCCAC						cg	R	B	C	II	1	9	110689745	Mus musculus	mm10	AaaATCTaCrTAAaAAAaATCCACCCACCAaaAaATaTACTTaaCCCACr	ACAGAAGAGGGCAGGATCTGCGTAAGAAAGATCCACCCACCAGGAGATGTACTTGGCCCA[CG]CTATGCCCCTTCCTAACCAAGGGCAAAGTTAAACTCAGCCAGAGCCAGCCTGCCACTGCC	ACAGAAGAGGGCAGGATCTGCGTAAGAAAGATCCACCCACCAGGAGATGTACTTGGCCCA[CG]CTATGCCCCTTCCTAACCAAGGGCAAAGTTAAACTCAGCCAGAGCCAGCCTGCCACTGCC	GRCm10															FALSE	Ccdc12	NM_028312.3	chr9	110656502	110711593	55092	+
0.560128	-2.19554	7.84782	1.08933e-06	0.00114167	5.81663	cg29979659	52783341	AAACCAAAACCRTAAAAATTCTCCRAAACAAACTTTCCACCCAAATTAAC						cg	R	B	C	II	1	11	96350183	Mus musculus	mm10	aaCCAaAaCCrTaaaAaTTCTCCraaaCAAACTTTCCACCCAAaTTAaCr	AGGGGGAGGGGAGGCCAGAGCCGTGGGAGTTCTCCGGGGCAAACTTTCCACCCAAGTTAG[CG]CCTTCCCTCTGTCCCCATTTCCCATCTGTTTCCTAGATCTCCCAGAATCACCTTTCTCTT	AGGGGGAGGGGAGGCCAGAGCCGTGGGAGTTCTCCGGGGCAAACTTTCCACCCAAGTTAG[CG]CCTTCCCTCTGTCCCCATTTCCCATCTGTTTCCTAGATCTCCCAGAATCACCTTTCTCTT	GRCm10	chr11:96352944-96353489													chr11:96345653-96346273	FALSE	Hoxb2	NM_134032.2	chr11	96350131	96351431	1301	+
0.731411	-3.01295	7.84104	1.10091e-06	0.00114959	5.80682	cg36441822	55758918	CRTTCCTAACRATAATAAAAAAACCCATTAACTACTTCTACCTTTAAAAC						cg	F	T	C	II	1	19	45065514	Mus musculus	mm10	rTTCCTaaCraTaATaAAaAaaCCCATTAaCTaCTTCTACCTTTAaaaCr	ATTAATCTTGGTTGACGGTTTCTCACGTCCTAATTGGGAGGTGGAGGGAGCGGCTCAGTC[CG]CCCTAAAGGTAGAAGCAGCTAATGGGCCTCTTCATCACCGCCAGGAACGGGTCCCTGGCG	ATTAATCTTGGTTGACGGTTTCTCACGTCCTAATTGGGAGGTGGAGGGAGCGGCTCAGTC[CG]CCCTAAAGGTAGAAGCAGCTAATGGGCCTCTTCATCACCGCCAGGAACGGGTCCCTGGCG	GRCm10			chr19:45065418-45065678	chr19	45065418	45065678	260	23	172	17.7	66.2	0.82			FALSE	.	.	.	.	.	.	.
0.809602	2.45744	7.83366	1.11366e-06	0.0011579	5.79614	cg28553977	70768335	CCTTCAATATAAATATTAAAAATTAAACCATAATAAACTAATTATACACA	3604964	CCTTCGATATAAATATTAAAAATTAAACCATAATAAACTAATTATACACG	T	Red	R	cg	R	B	C	I	1	10	63063809	Mus musculus	mm10	CCTTCrATaTAaATaTTaaaAATTAaACCATaaTaAACTaATTATaCACr	GGGTTACAGGTGCCTTCGATGTAGATGTTGGGAATTAGACCATGGTGAACTGATTATGCA[CG]GCTCCCCCAACCCCCAGCCTCACCCACCCCGGTTTTCTCCTTTTGTGCAGTCAAAGATTC	GGGTTACAGGTGCCTTCGATGTAGATGTTGGGAATTAGACCATGGTGAACTGATTATGCA[CG]GCTCCCCCAACCCCCAGCCTCACCCACCCCGGTTTTCTCCTTTTGTGCAGTCAAAGATTC	GRCm10															FALSE	Pbld1	NM_026701.2	chr10	63061616	63077545	15930	+
1.00686	4.32794	7.83002	1.12001e-06	0.0011579	5.79086	cg29896646	64643827	TACACCATACTAACATCCACAAAAAATATAAATACATTAATCTAATTACA	9654410	TACACCATACTAACGTCCACGAAAAATATAAATACGTTAATCTAATTACG	T	Red	R	cg	R	B	C	I	1	11	87871525	Mus musculus	mm10	TACACCATaCTaaCrTCCACrAAaaATaTAAaTaCrTTaATCTaaTTaCr	ACCTCGCTGCCATACACCATGCTGGCGTCCACGAAGGATGTAAGTGCGTTGATCTGGTTG[CG]GACTTTGTTCCTGTTTTGGGGGCACGCCGGGGCAGAGCGGAAGAAGGGGATGCAGTCGCG	ACCTCGCTGCCATACACCATGCTGGCGTCCACGAAGGATGTAAGTGCGTTGATCTGGTTG[CG]GACTTTGTTCCTGTTTTGGGGGCACGCCGGGGCAGAGCGGAAGAAGGGGATGCAGTCGCG	GRCm10			chr11:87871383-87871613	chr11	87871383	87871613	230	19	140	16.5	60.9	0.92			FALSE	Epx	NM_007946.2	chr11	87863997	87875536	11540	-
1.32238	2.58706	7.81612	1.14458e-06	0.0011579	5.77072	cg38346279	54772966	TACTACTTACTTCACAAAAAAAAATTACCTAAATCATTTCACTATCATCA	60724188	TACTACTTACTTCACAAAAAAAAATTACCTAAATCATTTCACTATCATCG	T	Red	R	cg	R	B	C	I	1	2	46722613	Mus musculus	mm10	TaCTACTTaCTTCACAaAAaAAaaTTaCCTaaaTCATTTCACTATCATCr	AAGGAAGCCTCATGCTACTTGCTTCACAGAAGAAGGTTGCCTGGGTCATTTCACTATCAT[CG]GGTTGGGGGGGGGGAAGCACACATAATACTGTGTATTCAACAAAAACGGATTCTTTTCAT	AAGGAAGCCTCATGCTACTTGCTTCACAGAAGAAGGTTGCCTGGGTCATTTCACTATCAT[CG]GGTTGGGGGGGGGGAAGCACACATAATACTGTGTATTCAACAAAAACGGATTCTTTTCAT	GRCm10															FALSE	.	.	.	.	.	.	.
0.50442	-0.599741	7.8155	1.14569e-06	0.0011579	5.76982	cg38585384	15775355	TAAACACACAACACATTTAACCAAATTACCTAATACAAAATAAAAACACC						cg	F	T	C	II	1	2	77113825	Mus musculus	mm10	AAaCACACAaCACATTTaACCAaATTaCCTAATaCAAaATAAAaACACCr	CGTGTCACAGTTCCAGTGTCTACTTTGATTCTTCTTTCTTTTGCTTAGAGCAGAAGAAAC[CG]GTGTCTTTATCTTGCATTAGGCAATCTGGTCAAATGTGCTGTGTGCTTAACGAGGCGATA	CGTGTCACAGTTCCAGTGTCTACTTTGATTCTTCTTTCTTTTGCTTAGAGCAGAAGAAAC[CG]GTGTCTTTATCTTGCATTAGGCAATCTGGTCAAATGTGCTGTGTGCTTAACGAGGCGATA	GRCm10															FALSE	Ccdc141	NM_001025576.3	chr2	77009905	77170635	160731	-
0.675669	-0.894799	7.81502	1.14654e-06	0.0011579	5.76913	cg42230919	41712336	TACCAAAAACACTAAACCATAATTTTAAAAAACATTCCACTACCAAAACA	28741861	TACCAAAAACACTAAACCATAATTTTAAAAAACATTCCGCTACCAAAACG	A	Red	R	cg	F	T	C	I	1	5	66080986	Mus musculus	mm10	TACCAAAAaCACTaAaCCATaaTTTTaAAaaaCATTCCrCTaCCAaAaCr	ATGAAACCAGTACCTGCCAAACACCTGGTGCTCACTCTGCCCTGCCGTCCTCGCCTCCCA[CG]CTCTGGCAGCGGAATGCCCTTCAAAACCATGGCTCAGTGCTTTTGGTAAATGTTTTACGA	ATGAAACCAGTACCTGCCAAACACCTGGTGCTCACTCTGCCCTGCCGTCCTCGCCTCCCA[CG]CTCTGGCAGCGGAATGCCCTTCAAAACCATGGCTCAGTGCTTTTGGTAAATGTTTTACGA	GRCm10															FALSE	Rbm47	NM_139065.3	chr5	66016548	66098179	81632	-
0.494928	-0.28569	7.81494	1.1467e-06	0.0011579	5.76901	cg29738131	49622353	CCTAACCACTTACATTTTTCCAAAAATCCATTCTTCTATTTTATTCAAAC						cg	F	T	C	II	1	11	72282174	Mus musculus	mm10	CTaACCACTTaCATTTTTCCAAaAaTCCATTCTTCTaTTTTaTTCAAaCr	TTTTTAACGTCCTCAAAGCTCCCTGGGAGGAGAACCAGGACTTGGCAGCAGTCAGGATGA[CG]CTTGAACAAAACAGAAGAATGGACTCTTGGAAAAATGCAAGTGGTCAGGTTATGTTTGGA	TTTTTAACGTCCTCAAAGCTCCCTGGGAGGAGAACCAGGACTTGGCAGCAGTCAGGATGA[CG]CTTGAACAAAACAGAAGAATGGACTCTTGGAAAAATGCAAGTGGTCAGGTTATGTTTGGA	GRCm10															FALSE	.	.	.	.	.	.	.
0.700251	0.297759	7.81478	1.14699e-06	0.0011579	5.76877	cg43703075	19655339	TAAAATCTTAAATCCCTAACTACTAAACTCAAAACTATTTCCAAATTATC						cg	R	B	C	II	1	6	91707902	Mus musculus	mm10	aaAaTCTTaaATCCCTAACTaCTaAaCTCAaaACTaTTTCCAaaTTATCr	GAAACACACTCTGGAGTCTTGGATCCCTAACTGCTGAGCTCAGGACTGTTTCCAGGTTAT[CG]CCTTTAATACCACAAAGTCCTAACCCCTTCAACTTGGCATGGGAAGGTACTGACAGTGGC	GAAACACACTCTGGAGTCTTGGATCCCTAACTGCTGAGCTCAGGACTGTTTCCAGGTTAT[CG]CCTTTAATACCACAAAGTCCTAACCCCTTCAACTTGGCATGGGAAGGTACTGACAGTGGC	GRCm10															FALSE	Slc6a6	NM_009320.4	chr6	91684066	91759063	74998	+
0.802711	-0.274914	7.81219	1.15163e-06	0.0011579	5.76502	cg47743423	5774133	ATAATTTCACATTAAATATAAAATAAACTCATCCAACCTCCTATAAAACA	41800228	ATAATTTCGCATTAAATATAAAATAAACTCGTCCGACCTCCTATAAAACG	T	Red	R	cg	R	B	C	I	1	X	74312949	Mus musculus	mm10	aTaATTTCrCATTaaaTATaaaATaAACTCrTCCraCCTCCTaTaAaaCr	CAGAAAGAACTGGTGATTTCGCATTGGGTATGGGATGAACTCGTCCGGCCTCCTGTGAGG[CG]GGGCGAGGTGCGATCACGTGTCAGAGCCGCGGGCGTAGGGCAGGGCCTGCGTCCGCACGT	CAGAAAGAACTGGTGATTTCGCATTGGGTATGGGATGAACTCGTCCGGCCTCCTGTGAGG[CG]GGGCGAGGTGCGATCACGTGTCAGAGCCGCGGGCGTAGGGCAGGGCCTGCGTCCGCACGT	GRCm10			chrX:74312929-74313457	chrX	74312929	74313457	528	42	302	15.9	57.2	0.97			FALSE	Fam50a	NM_138607.3	chrX	74312832	74313032	201	+
0.726617	1.65559	7.80862	1.15807e-06	0.0011579	5.75984	cg30905702	52760157	TCAATATAATAAAATACTCTATCACAAAATACCAACCTAAAAAAATCAAC						cg	R	B	C	II	1	12	85127455	Mus musculus	mm10	CAATaTAATAAAaTACTCTATCACAAAATACCAaCCTAaAAaAATCAaCr	TTCTCTAGTAGTCAATGTAATAAAGTACTCTATCACAAAATACCAGCCTAGAAGAATCAG[CG]CCATCCTGTCCCTTAAGATGGTTGAGCCCTTTTAAGGAGATCCTTTTAGTTCTATGAGTC	TTCTCTAGTAGTCAATGTAATAAAGTACTCTATCACAAAATACCAGCCTAGAAGAATCAG[CG]CCATCCTGTCCCTTAAGATGGTTGAGCCCTTTTAAGGAGATCCTTTTAGTTCTATGAGTC	GRCm10															FALSE	Dlst	NM_030225.4	chr12	85110832	85134091	23260	+
0.808931	0.901607	7.80646	1.16199e-06	0.0011579	5.7567	cg28604750	51786371	ACACTCTATATCRACATCTTTACTAATAAAAAAAATTACTCCTAATACCC						cg	R	B	C	II	1	10	69219235	Mus musculus	mm10	CACTCTaTaTCrACATCTTTaCTaATAAaaAaaaTTaCTCCTAaTACCCr	GAGAAAAAAGAACACTCTGTGTCGACATCTTTGCTGATAAGGAGGGTTGCTCCTAGTACC[CG]CCGTATCTGTACACCGTTGGCACTCTCTTATCTCTCTGCTGGACATGGCTTGGGTTGTGT	GAGAAAAAAGAACACTCTGTGTCGACATCTTTGCTGATAAGGAGGGTTGCTCCTAGTACC[CG]CCGTATCTGTACACCGTTGGCACTCTCTTATCTCTCTGCTGGACATGGCTTGGGTTGTGT	GRCm10															FALSE	Rhobtb1	NM_001252636.1	chr10	69208551	69291791	83241	+
0.638857	-0.704975	7.80575	1.16328e-06	0.0011579	5.75568	cg47743984	6760193	AAACATTCAACTTATCCAAAACCAAATACTTCAATATAAACACTAACTCA	26665951	AAACATTCAACTTATCCGAAACCAAATACTTCAATATAAACACTAACTCG	A	Red	R	cg	R	B	C	I	1	X	74368246	Mus musculus	mm10	aaACATTCAaCTTATCCrAaACCAaaTaCTTCAaTaTAaACACTAaCTCr	GCTGGCGCACAGGGACATTCAGCTTATCCGAGACCAGGTGCTTCAGTGTAGACACTAGCT[CG]TCCTCCGCCACCTGATCCGGCCGAGGTGGAGAGGCAAGGGCTCAGCCCGAATTCCCTGGG	GCTGGCGCACAGGGACATTCAGCTTATCCGAGACCAGGTGCTTCAGTGTAGACACTAGCT[CG]TCCTCCGCCACCTGATCCGGCCGAGGTGGAGAGGCAAGGGCTCAGCCCGAATTCCCTGGG	GRCm10			chrX:74368245-74368698	chrX	74368245	74368698	453	35	287	15.5	63.4	0.78			FALSE	Ubl4a	NM_145405.2	chrX	74365717	74368548	2832	-
0.716077	0.772185	7.80338	1.1676e-06	0.0011579	5.75224	cg35573731	59701559	TAATCTTCCAAACATAAAATTCTATATAACAAAAATCCRTATTCAACAAC						cg	F	T	C	II	1	18	33803994	Mus musculus	mm10	aaTCTTCCAAaCATAaAATTCTATATaACAaAAATCCrTATTCAACAaCr	ATGAAAAGGAATGGACTACGGTAAGGGGTAGGAGCCAAAGCACCGATGTCTGACCAGGAA[CG]CTGTTGAATACGGATTTCTGTCATATAGAATTCTATGCTTGGAAGACCATGTGAACAGCC	ATGAAAAGGAATGGACTACGGTAAGGGGTAGGAGCCAAAGCACCGATGTCTGACCAGGAA[CG]CTGTTGAATACGGATTTCTGTCATATAGAATTCTATGCTTGGAAGACCATGTGAACAGCC	GRCm10															FALSE	Epb41l4a	NM_013512.2	chr18	33796326	34007206	210881	-
0.73684	0.595429	7.80231	1.16957e-06	0.0011579	5.75068	cg40608391	40720555	AATCTACCTTTTCTATTAACTCATCCAAACTACTATAAAATACATAATTC						cg	R	B	C	II	1	4	10931329	Mus musculus	mm10	aTCTaCCTTTTCTaTTaACTCATCCAAaCTaCTaTaAaATACATaaTTCr	GGCCAAGGTCAGGTCTGCCTTTTCTGTTGACTCATCCAAGCTGCTGTGAGATACATGGTT[CG]CTCGGATGAAGCATGTCCATTTCATAAGTCACCCAAGTCATTAGAGGCAGCTGAGGTGTA	GGCCAAGGTCAGGTCTGCCTTTTCTGTTGACTCATCCAAGCTGCTGTGAGATACATGGTT[CG]CTCGGATGAAGCATGTCCATTTCATAAGTCACCCAAGTCATTAGAGGCAGCTGAGGTGTA	GRCm10															FALSE	.	.	.	.	.	.	.
0.534348	-1.00517	7.79815	1.1772e-06	0.0011579	5.74464	cg35754059	73722277	AAATTTTCTACCTAAATCCACAAATTCAACAATATTCATATTACCAAAAC						cg	F	T	C	II	1	18	56400193	Mus musculus	mm10	aaTTTTCTaCCTAAaTCCACAaATTCAaCAATaTTCATATTACCAAAaCr	TCATCCCACTAACATTGGCTCTGAAAGAGAAACAGATGTGTTTGGGGAATTCAGCTCTCT[CG]CTTTGGTAATATGAACATTGCTGAATCTGTGGACTTAGGCAGAAAACCCTACGGAAAAAT	TCATCCCACTAACATTGGCTCTGAAAGAGAAACAGATGTGTTTGGGGAATTCAGCTCTCT[CG]CTTTGGTAATATGAACATTGCTGAATCTGTGGACTTAGGCAGAAAACCCTACGGAAAAAT	GRCm10															FALSE	.	.	.	.	.	.	.
0.560013	-1.26533	7.79785	1.17774e-06	0.0011579	5.7442	cg45205365	26671950	AATTAATACTTCTCTCAAAAAAACAACCRTATCTCTTTTATTATCACATC						cg	F	T	C	II	1	7	134612125	Mus musculus	mm10	ATTaATaCTTCTCTCAAAaAaaCAACCrTaTCTCTTTTATTaTCACATCr	AAGACGTTTTTCTCAGCGATGTCATTCTAGGTCTGCTCTCTCAACCTTGTGATCATCTAT[CG]ATGTGACAATAAAAGAGACACGGTTGCCTCTTTGAGAGAAGCATCAATTATCTGTTTTGC	AAGACGTTTTTCTCAGCGATGTCATTCTAGGTCTGCTCTCTCAACCTTGTGATCATCTAT[CG]ATGTGACAATAAAAGAGACACGGTTGCCTCTTTGAGAGAAGCATCAATTATCTGTTTTGC	GRCm10															FALSE	.	.	.	.	.	.	.
0.580416	-0.186694	7.79465	1.18366e-06	0.0011579	5.73955	cg46112238	41663255	RTTAATCCAAAAAATATCTCTACAAACTTACCTAAAACRAACCTAATAAC						cg	F	T	C	II	1	8	106571925	Mus musculus	mm10	TTAATCCAaAAAATaTCTCTaCAaaCTTaCCTaAaaCrAACCTaATaaCr	TTTGTCAACTTGGCACAAGTAGGGTTTTCTGGGAAGAAGGAACCTCAATTGAGAAAATGC[CG]CCATCAGGTTCGCCTCAGGCAAGCCTGCAGAGACATTTTCTGGATTAACGATTAACAAGG	TTTGTCAACTTGGCACAAGTAGGGTTTTCTGGGAAGAAGGAACCTCAATTGAGAAAATGC[CG]CCATCAGGTTCGCCTCAGGCAAGCCTGCAGAGACATTTTCTGGATTAACGATTAACAAGG	GRCm10															FALSE	.	.	.	.	.	.	.
0.60956	-0.291573	7.78844	1.19523e-06	0.0011579	5.73052	cg28241116	37772202	AAACTAATAAACCTATCAATTTACAACTCAATAAAACCTTCATATTTCAC						cg	F	T	C	II	1	10	20208027	Mus musculus	mm10	aaCTaATAaACCTaTCAaTTTACAaCTCAaTAAAACCTTCATaTTTCACr	GTCTCAGGCCCTAGTGTGATAAGAACTTGACTCTGTACTTTGTGTCGCATATCAGAGCAT[CG]TGAAACATGAAGGTTTTACTGAGCTGTAAACTGACAGGTCTATCAGCCCTTTAGATTCTC	GTCTCAGGCCCTAGTGTGATAAGAACTTGACTCTGTACTTTGTGTCGCATATCAGAGCAT[CG]TGAAACATGAAGGTTTTACTGAGCTGTAAACTGACAGGTCTATCAGCCCTTTAGATTCTC	GRCm10															FALSE	Map7	NM_008635.2	chr10	20148919	20281590	132672	+
0.840987	-3.19027	7.78654	1.1988e-06	0.0011579	5.72775	cg30222600	82745254	TACAAAACCTAACAATATACAATTACCAAAAACCAATACAACAAAAATCC						cg	F	T	C	II	1	11	116102151	Mus musculus	mm10	aCAaaaCCTaaCAaTaTaCAaTTaCCAAaAaCCAaTaCAaCAaAAaTCCr	CTTCCTGAGCTTTGTTTCTGTGGGAAAATAAGCTGCAGAGTGCAAACAACAGCCCGAGGA[CG]GACTTCTGCTGCACTGGCTCTTGGCAACTGCACACTGCCAGGCCCTGCAGCCCTTGCGGC	CTTCCTGAGCTTTGTTTCTGTGGGAAAATAAGCTGCAGAGTGCAAACAACAGCCCGAGGA[CG]GACTTCTGCTGCACTGGCTCTTGGCAACTGCACACTGCCAGGCCCTGCAGCCCTTGCGGC	GRCm10															FALSE	.	.	.	.	.	.	.
1.38938	-5.52562	7.78621	1.19942e-06	0.0011579	5.72727	cg29947386	69790301	AAATCAAAAATTACTTCCRTATATTCTCATCTTCCAATCTCAAATTTAAC						cg	F	T	C	II	1	11	93995170	Mus musculus	mm10	AaTCAaAaATTACTTCCrTaTATTCTCATCTTCCAaTCTCAAaTTTaaCr	TCGGAGTCGGTGTATCTGAGTCAGCTATGGCAAAGGGAAGAGGCTTTTGCGAGTGTCTTC[CG]CCAAACTTGAGACTGGAAGATGAGAATACACGGAAGTAATCTCTGACTCAGCCTGCCCAA	TCGGAGTCGGTGTATCTGAGTCAGCTATGGCAAAGGGAAGAGGCTTTTGCGAGTGTCTTC[CG]CCAAACTTGAGACTGGAAGATGAGAATACACGGAAGTAATCTCTGACTCAGCCTGCCCAA	GRCm10		chr11:93996308-93996727													FALSE	Spag9	NM_027569.2	chr11	93994590	93995890	1301	+
0.695308	0.442817	7.78586	1.20008e-06	0.0011579	5.72676	cg32611027	91787353	CCAAACRTCATACAAAAATTTCACTACTATAAACATCTATTATTTATCTC						cg	R	B	C	II	1	14	66184082	Mus musculus	mm10	CAAACrTCATaCAaAAaTTTCACTACTaTaAACATCTATTaTTTaTCTCr	CACGAGTGTGGCCAAACGTCATGCAGAAGTTTCACTACTGTGAACATCTATTGTTTGTCT[CG]CCCTCCCCGGCCACCACCAACCTTTTTATTATTACGGTTTTGCCTTTCCCAGGGAATCAC	CACGAGTGTGGCCAAACGTCATGCAGAAGTTTCACTACTGTGAACATCTATTGTTTGTCT[CG]CCCTCCCCGGCCACCACCAACCTTTTTATTATTACGGTTTTGCCTTTCCCAGGGAATCAC	GRCm10															FALSE	Ptk2b	NM_001162366.1	chr14	66153256	66213552	60297	-
0.671015	1.14844	7.78536	1.201e-06	0.0011579	5.72604	cg37196784	19740351	AATCATAACCCACAAATTAAAAACTACAACAACACTAATTAATCCTAACC						cg	F	T	C	II	1	1	88413039	Mus musculus	mm10	aTCATaACCCACAaaTTaaAAACTaCAaCAaCACTAaTTAATCCTaACCr	CAAGGCTGAGACTTTCTAGCTTTCCACAATCACCATATTTTAACCAGTCTGTCCCTGTGT[CG]GTCAGGATTAACTAGTGCTGCTGCAGTTTCCAACCTGTGGGTCATGACCCCACTCACAGG	CAAGGCTGAGACTTTCTAGCTTTCCACAATCACCATATTTTAACCAGTCTGTCCCTGTGT[CG]GTCAGGATTAACTAGTGCTGCTGCAGTTTCCAACCTGTGGGTCATGACCCCACTCACAGG	GRCm10															FALSE	Spp2	NM_029269.3	chr1	88407009	88426438	19430	+
0.595249	-0.904157	7.785	1.20168e-06	0.0011579	5.72552	cg32961033	76769246	ATCTATATTTTCTTCCAAAAAAACTTACCAACTAACAACACAAAAATCCA	82767525	ATCTATATTTTCTTCCAAAAAAACTTACCAACTAACAACACAAAAATCCG	T	Red	R	cg	F	T	C	I	1	14	118756746	Mus musculus	mm10	ATCTATaTTTTCTTCCAAaAaAaCTTaCCAaCTaaCAaCACAAAaATCCr	ATATGGACTGGAGGCTCTGTTAAAAAGAATTACTTATTAATTACACGAGCTCTTAGTTAC[CG]GATCTTTGTGCTGCCAGCTGGCAAGCTCTCTTGGAAGAAAACATAGATACCTTGTAACTG	ATATGGACTGGAGGCTCTGTTAAAAAGAATTACTTATTAATTACACGAGCTCTTAGTTAC[CG]GATCTTTGTGCTGCCAGCTGGCAAGCTCTCTTGGAAGAAAACATAGATACCTTGTAACTG	GRCm10															FALSE	.	.	.	.	.	.	.
0.552123	0.0289952	7.78486	1.20194e-06	0.0011579	5.72532	cg29497736	82785105	AACAAAACTTAACTAAACACTACAATTACTAACRATCTCTCTATCTCTCC						cg	F	T	C	II	1	11	48844352	Mus musculus	mm10	aCAAAaCTTAaCTaAaCACTaCAaTTaCTaACrATCTCTCTaTCTCTCCr	AAGTGAGTCCTAATGCAGAAAGTCCCTAAGAATGCAGTGTGTAGAGCCCCAGCCCCTAAA[CG]GAGAGACAGAGAGATCGTCAGCAACTGCAGTGCTCAGCTAAGCTTTGCTGGAACTGTGTC	AAGTGAGTCCTAATGCAGAAAGTCCCTAAGAATGCAGTGTGTAGAGCCCCAGCCCCTAAA[CG]GAGAGACAGAGAGATCGTCAGCAACTGCAGTGCTCAGCTAAGCTTTGCTGGAACTGTGTC	GRCm10															FALSE	Trim7	NM_053166.2	chr11	48826137	48850195	24059	+
0.469342	-2.0074	7.77835	1.21427e-06	0.00115831	5.71584	cg39296568	79744525	ACCCTACCTAACRTCAAACTCTAACCAAACCAAAAACATAATATACTAAC						cg	F	T	C	II	1	2	167860748	Mus musculus	mm10	CCCTaCCTaACrTCAaaCTCTaACCAaACCAaaaACATAATaTaCTaaCr	CCATCCCCGGTTCTCTGGATGGCCCCACCTTGCCTCTGCTGCACTCAGTCTTTGTCCTGA[CG]CCAGCACATTATGTCCCTGGTCTGGTCAGAGCCTGACGTCAGGCAGGGCCTGGCGGGCAG	CCATCCCCGGTTCTCTGGATGGCCCCACCTTGCCTCTGCTGCACTCAGTCTTTGTCCTGA[CG]CCAGCACATTATGTCCCTGGTCTGGTCAGAGCCTGACGTCAGGCAGGGCCTGGCGGGCAG	GRCm10															FALSE	.	.	.	.	.	.	.
0.819465	0.534224	7.77783	1.21527e-06	0.00115831	5.71507	cg37067409	29629214	ATACCTACCTACCAAAAAACTTTAAAAACTTTACTTAAACTTACTAATAC						cg	F	T	C	II	1	1	72288913	Mus musculus	mm10	TaCCTaCCTaCCAAaAAACTTTAaAAACTTTACTTaAACTTACTaATaCr	TGGAAGAGCCGATGTTCCTGGGAAAAGCCAGCTCTGAGAAGACATGGAAGGTAAATTTTA[CG]CATCAGTAAGTTCAAGTAAAGTTTCTAAAGTTTCTTGGCAGGCAGGCATGATGATGCACA	TGGAAGAGCCGATGTTCCTGGGAAAAGCCAGCTCTGAGAAGACATGGAAGGTAAATTTTA[CG]CATCAGTAAGTTCAAGTAAAGTTTCTAAAGTTTCTTGGCAGGCAGGCATGATGATGCACA	GRCm10															FALSE	Tmem169	NM_175564.4	chr1	72284372	72302995	18624	+
1.44582	-1.96756	7.77672	1.21738e-06	0.00115831	5.71346	cg35050398	21700369	ACTATAATCCCAAACTCAAAACCCCAAAACATAAACATATAAATATAACA	24616935	ACTATAATCCCAAACTCGAAACCCCAAAACGTAAACGTATAAATATAACG	A	Red	R	cg	F	T	C	I	1	17	56124493	Mus musculus	mm10	aCTaTaaTCCCAaaCTCrAaACCCCAaaaCrTaaaCrTaTaaaTaTaaCr	TGGACACGGGGCTGCTGCCCACCCCAGAGCAGACGCCTCTACCCCAGAAACGCCTGCCCA[CG]CCACACCCACACGCCCACGCCCTGGGGTCTCGAGCCTGGGACCACAGCCACGCGCTGCTG	TGGACACGGGGCTGCTGCCCACCCCAGAGCAGACGCCTCTACCCCAGAAACGCCTGCCCA[CG]CCACACCCACACGCCCACGCCCTGGGGTCTCGAGCCTGGGACCACAGCCACGCGCTGCTG	GRCm10			chr17:56123812-56124909	chr17	56123812	56124909	1097	110	794	20.1	72.4	0.77		chr17:56119964-56120812	FALSE	Sema6b	NM_013662.2	chr17	56123084	56133852	10769	-
0.514598	-0.305492	7.7761	1.21857e-06	0.00115831	5.71256	cg30846728	67622423	TTTTAACCACAAATAACACTTTATACTTAACTACATTCACTTCCAACTCA	98691898	TTTTAACCACGAATAACGCTTTATACTTAACTACGTTCACTTCCAACTCG	A	Red	R	cg	R	B	C	I	1	12	79541700	Mus musculus	mm10	TTTTAaCCACraATaaCrCTTTaTaCTTaaCTaCrTTCACTTCCAACTCr	TGCATCATTTCCTTTTAGCCACGGATGGCGCTTTGTGCTTGGCTGCGTTCACTTCCAACT[CG]TCAAGCCTATGTTATGAAAGAGAAATAAGACACTTAATCCTAGGAATGATTAACCTGCAT	TGCATCATTTCCTTTTAGCCACGGATGGCGCTTTGTGCTTGGCTGCGTTCACTTCCAACT[CG]TCAAGCCTATGTTATGAAAGAGAAATAAGACACTTAATCCTAGGAATGATTAACCTGCAT	GRCm10															FALSE	Rad51b	NM_009014.3	chr12	79297281	79814690	517410	+
0.848715	1.62491	7.76988	1.23051e-06	0.0011649	5.7035	cg32165587	64715377	TTACAAATCATAAAACCTTACTTCATAATATACTCCATCAAATAAACCCA	78637276	TTACGAATCGTAAAACCTTACTTCGTAATATACTCCATCAAATAAACCCG	T	Red	R	cg	F	T	C	I	1	14	8222730	Mus musculus	mm10	TTaCraATCrTaAAACCTTaCTTCrTaATaTACTCCATCAaATaaACCCr	AGAGACTGCCAGGTCTCCTTCACCTTTGGACCGTGCGATTACCACCAGGAAGTCTCTCTC[CG]GGTCCATCTGATGGAGTACATCACGAAGCAAGGTTTCACGATCCGCAATACTCGGGTGCA	AGAGACTGCCAGGTCTCCTTCACCTTTGGACCGTGCGATTACCACCAGGAAGTCTCTCTC[CG]GGTCCATCTGATGGAGTACATCACGAAGCAAGGTTTCACGATCCGCAATACTCGGGTGCA	GRCm10															FALSE	Kctd6	NM_027782.3	chr14	8214080	8223570	9491	+
0.977925	2.12906	7.76826	1.23364e-06	0.0011649	5.70114	cg29895631	45652316	CCTAAAAACRCTTTTATAAACTTCCACAACCCAACACAATAAATAAACTC						cg	R	B	C	II	1	11	87802570	Mus musculus	mm10	CTaaAaACrCTTTTaTaaaCTTCCACAaCCCAaCACAaTaaaTaAaCTCr	AGGATACAATGCCTGGAGACGCTTTTGTGGGCTTCCACAGCCCAGCACAGTGGGTGAGCT[CG]GCACGGTGCTGAAGAACCTGGAGTTGGCACGGAAGCTGATGGCACAATATGGCACGCCCA	AGGATACAATGCCTGGAGACGCTTTTGTGGGCTTCCACAGCCCAGCACAGTGGGTGAGCT[CG]GCACGGTGCTGAAGAACCTGGAGTTGGCACGGAAGCTGATGGCACAATATGGCACGCCCA	GRCm10															FALSE	Mpo	NM_010824.2	chr11	87793783	87804412	10630	+
0.707748	-0.348268	7.75556	1.25849e-06	0.00118228	5.6826	cg43646794	12633582	TATATATTACATAACAATACTTAATTCTAATACCTAATTCCTAACTTCAC						cg	F	T	C	II	1	6	85919564	Mus musculus	mm10	aTATATTACATaaCAATaCTTAATTCTaaTaCCTAATTCCTAACTTCACr	AAACTGGAACAAACAGGTTGTTGAGGGAAACTTCCAAGTCTGCCTCCAAAGGGCAGGGAA[CG]TGAAGTTAGGAATTAGGCACCAGAATTAAGCATTGCCATGTAATATACACGTGTAGTAAA	AAACTGGAACAAACAGGTTGTTGAGGGAAACTTCCAAGTCTGCCTCCAAAGGGCAGGGAA[CG]TGAAGTTAGGAATTAGGCACCAGAATTAAGCATTGCCATGTAATATACACGTGTAGTAAA	GRCm10														chr6:85915672-85916086	FALSE	Tprkb	NM_176842.3	chr6	85915718	85930284	14567	+
0.580651	-0.828467	7.75463	1.26031e-06	0.00118228	5.68126	cg45556888	53786494	TTACTATCTATCRAATCTTAAAAATAATAACCTACCTAACAACACTCTAC						cg	R	B	C	II	1	8	33674435	Mus musculus	mm10	TACTaTCTaTCrAaTCTTAaAAATAATAACCTACCTAACAaCACTCTaCr	CTCTTGAATAGTTACTGTCTGTCGAGTCTTAGAAATAATAACCTACCTAACAGCACTCTG[CG]CCACACCAGGAGCAAAAGGTGACTGACCGTTCTCCATGACTTCTCTTGCTGAGTCCTGGC	CTCTTGAATAGTTACTGTCTGTCGAGTCTTAGAAATAATAACCTACCTAACAGCACTCTG[CG]CCACACCAGGAGCAAAAGGTGACTGACCGTTCTCCATGACTTCTCTTGCTGAGTCCTGGC	GRCm10															FALSE	Gsr	NM_010344.4	chr8	33653237	33698162	44926	+
1.12557	0.815713	7.75225	1.26504e-06	0.00118284	5.67777	cg31121640	60684875	CTTTTTTAATATCAAATCCCACCCTAAAAACACTCCCTATCCCTAATAAC						cg	R	B	C	II	1	12	109715437	Mus musculus	mm10	TTTTTTAaTATCAAATCCCACCCTaaaaaCACTCCCTaTCCCTaATaACr	ACGGGAAACCTCTTTTTTAGTATCAAATCCCACCCTGGGGGCACTCCCTGTCCCTGATGA[CG]CCTTCAGGGAAGGGACCTGGACTGCTGTTCCCTGGACTCTGGGACATGGGACATGGGAGT	ACGGGAAACCTCTTTTTTAGTATCAAATCCCACCCTGGGGGCACTCCCTGTCCCTGATGA[CG]CCTTCAGGGAAGGGACCTGGACTGCTGTTCCCTGGACTCTGGGACATGGGACATGGGAGT	GRCm10															TRUE	Mir1193	NR_035424.1	chr12	109714170	109715470	1301	+
0.632764	-0.693555	7.74688	1.27576e-06	0.0011884	5.66993	cg29902070	45789339	TAAAAACACTATCACTTAAAATCRTTAAACCCATCTCATTATAACATCAC						cg	R	B	C	II	1	11	88293993	Mus musculus	mm10	AaAAACACTATCACTTaAAaTCrTTaaACCCATCTCATTaTaACATCACr	GATTTGGGAGCTAGAAACACTATCACTTGAAGTCGTTGGACCCATCTCATTGTGACATCA[CG]ACCCTTCAGCCAATCAGAAAGAAAACCCCCAGTTCACTATTTTGCATATTGTTGGTAACC	GATTTGGGAGCTAGAAACACTATCACTTGAAGTCGTTGGACCCATCTCATTGTGACATCA[CG]ACCCTTCAGCCAATCAGAAAGAAAACCCCCAGTTCACTATTTTGCATATTGTTGGTAACC	GRCm10		chr11:88294375-88294588													FALSE	Ccdc182	NM_028859.1	chr11	88293842	88294042	201	+
0.498734	-0.871973	7.74512	1.2793e-06	0.0011884	5.66736	cg35835176	46777947	TAAACCTCACCTTAATAAAACATCCACATTCTTCCACTTATAATTTATTC						cg	R	B	C	II	1	18	65072371	Mus musculus	mm10	AAaCCTCACCTTAATAaAACATCCACATTCTTCCACTTaTaATTTATTCr	CAAAGAGTAGCTAAGCCTCACCTTAATAGAACATCCACATTCTTCCACTTGTGATTTATT[CG]CCTCCGTTTTTGTATCCCCTGAATACTGTACAAGTGACACACATGGCTGGAGTTGGTGGG	CAAAGAGTAGCTAAGCCTCACCTTAATAGAACATCCACATTCTTCCACTTGTGATTTATT[CG]CCTCCGTTTTTGTATCCCCTGAATACTGTACAAGTGACACACATGGCTGGAGTTGGTGGG	GRCm10															FALSE	Nedd4l	NM_001114386.1	chr18	64887755	65217826	330072	+
1.12441	1.66535	7.72971	1.31068e-06	0.00121256	5.64483	cg29168284	62649385	TCATAACTTCCCTTAACCTTATATATTTCTCACRTTAAATACATTTATAC						cg	F	T	C	II	1	10	128965427	Mus musculus	mm10	CATaaCTTCCCTTaACCTTaTaTaTTTCTCACrTTAAATACATTTaTaCr	TGGGAATAATAAAACATCATCTTAGAACTCAAAAGAGCAACCGGCAGGAGTCACACACGA[CG]CACAAATGTATTTAACGTGAGAAACACACAAGGTCAAGGGAAGCCATGAGCTCTTCAGCC	TGGGAATAATAAAACATCATCTTAGAACTCAAAAGAGCAACCGGCAGGAGTCACACACGA[CG]CACAAATGTATTTAACGTGAGAAACACACAAGGTCAAGGGAAGCCATGAGCTCTTCAGCC	GRCm10															FALSE	.	.	.	.	.	.	.
0.419062	-1.30048	7.72704	1.3162e-06	0.00121256	5.64092	cg30296747	71750465	AACAACCAATCACRCATAAATACCAACATATAAAAAACATTCCTATAACC						mu	F	T	C	II	1	11	120788761	Mus musculus	mm10	ACAaCCAaTCACrCATaAaTACCAACATaTaAAAaaCATTCCTaTaACCr	NNNNNNNNNNNNNNNNNNNNNNNNNNNNNNNNNNNNNNNNNNNNNNNNNNNNNNNNNNNN[NN]NNNNNNNNNNNNNNNNNNNNNNNNNNNNNNNNNNNNNNNNNNNNNNNNNNNNNNNNNNNN	CAGGCAGGAGGCCCAGGTGCTGCTTCCACAGGCAGAGTAGGTGTGCAGACTATGGTCTGA[CG]GTCACAGGAATGCCTTTCACATGTTGGTACTCATGCGTGACTGGCTGTTGGCTGGAGTCA	GRCm10														chr11:120783758-120784818	TRUE	Gps1	NM_001177874.1	chr11	120784271	120789102	4832	+
0.568486	1.01848	7.72616	1.31802e-06	0.00121256	5.63964	cg28831910	23646367	TTAATAATCTATACAACCTAACTTATATCAACTTACAAAAACTTAACTAC						cg	R	B	C	II	1	10	91162162	Mus musculus	mm10	TAATAATCTaTaCAaCCTaACTTATaTCAaCTTaCAaAaACTTAaCTACr	TAGGATCTGAATTAATAATCTGTGCAGCCTGACTTATGTCAGCTTGCAGAGACTTAGCTA[CG]AAGGCCGTGTGGGCTGCAATCTGCAATGCTGATGCTGCAGCTTCGTAAGATCTACAGAGA	TAGGATCTGAATTAATAATCTGTGCAGCCTGACTTATGTCAGCTTGCAGAGACTTAGCTA[CG]AAGGCCGTGTGGGCTGCAATCTGCAATGCTGATGCTGCAGCTTCGTAAGATCTACAGAGA	GRCm10															FALSE	Tmpo	NM_001283048.1	chr10	91147570	91170550	22981	-
0.596575	-0.96785	7.72063	1.32954e-06	0.00121924	5.63154	cg33914116	97791282	CAAAACAATATTAAAATTCTATACTCAAAACACACRAAAACAAACTCCTC						cg	R	B	C	II	1	16	11406502	Mus musculus	mm10	AAAACAaTaTTAaaATTCTATaCTCAaAaCACACraaaACAAACTCCTCr	AGTTCTAAGAACAAAACAGTGTTAGGATTCTATGCTCAGAGCACACGGGGACAAACTCCT[CG]GCAGGTTCATGCCTGGAGCACATTAAGGTCAGACCAGGTGTTCTGCTTCTCTGAACAGGA	AGTTCTAAGAACAAAACAGTGTTAGGATTCTATGCTCAGAGCACACGGGGACAAACTCCT[CG]GCAGGTTCATGCCTGGAGCACATTAAGGTCAGACCAGGTGTTCTGCTTCTCTGAACAGGA	GRCm10															FALSE	Snx29	NM_028964.4	chr16	11322903	11755473	432571	+
0.535168	0.694625	7.71832	1.33438e-06	0.00121977	5.62816	cg38463264	51809499	AAACAACCTATTTTCATAATTAATTACTATCTCTCTATCTTCAACTTAAC						cg	F	T	C	II	1	2	63925831	Mus musculus	mm10	AACAaCCTaTTTTCATAATTaATTACTATCTCTCTaTCTTCAACTTAaCr	GAAGCCGCAGGGGAATTCTAAAGCAATGGTTGCTTGGTAGGTTTCTGTGGGTAGATGATT[CG]CTAAGTTGAAGACAGAGAGATAGTAATCAATTATGAAAACAGGCTGTTCTACAGTTGGTA	GAAGCCGCAGGGGAATTCTAAAGCAATGGTTGCTTGGTAGGTTTCTGTGGGTAGATGATT[CG]CTAAGTTGAAGACAGAGAGATAGTAATCAATTATGAAAACAGGCTGTTCTACAGTTGGTA	GRCm10															FALSE	.	.	.	.	.	.	.
0.616345	2.87123	7.70867	1.35482e-06	0.00123015	5.61402	cg41579191	24660162	TCACAATCAAATAATCAAACTTATCTATCTAAATATCTCAAACTATATAC						cg	F	T	C	II	1	4	138219564	Mus musculus	mm10	CACAATCAaaTaATCAaaCTTaTCTaTCTaAaTaTCTCAaaCTaTaTaCr	CAAACCACTCCGATCACATCATCCTTTGGGAAGTGACACTGCTGAAGCCACACATGCCCA[CG]CACACAGCCTGAGACACTCAGACAGACAAGCCTGATCACCTGATTGTGACCCCTGGGGTG	CAAACCACTCCGATCACATCATCCTTTGGGAAGTGACACTGCTGAAGCCACACATGCCCA[CG]CACACAGCCTGAGACACTCAGACAGACAAGCCTGATCACCTGATTGTGACCCCTGGGGTG	GRCm10													chr4:138216399-138217685		FALSE	Hp1bp3	NM_001285480.1	chr4	138216611	138244683	28073	+
0.67792	0.0942174	7.70631	1.35988e-06	0.00123015	5.61055	cg38176529	2707966	AACTAATCAACACTATAAAAATTATTATTAACCCCAACATATTATCCTAC						cg	R	B	C	II	1	2	27248484	Mus musculus	mm10	aCTaaTCAaCACTaTAaaAaTTaTTaTTaACCCCAaCATaTTATCCTaCr	CTGGGACTGGTGGCTGGTCAGCACTGTAGGAGTTGTTGTTGACCCCAGCATGTTATCCTG[CG]CAGGTCAAGGAGAGGGAGGCTGTGCCCATGAGTGCTGAAGGGCACAGCTCATATCCAGGG	CTGGGACTGGTGGCTGGTCAGCACTGTAGGAGTTGTTGTTGACCCCAGCATGTTATCCTG[CG]CAGGTCAAGGAGAGGGAGGCTGTGCCCATGAGTGCTGAAGGGCACAGCTCATATCCAGGG	GRCm10															FALSE	Sardh	NM_138665.2	chr2	27247503	27248803	1301	-
0.5271	0.0561886	7.70525	1.36216e-06	0.00123015	5.609	cg30999203	71714955	CATTCTAAACCCCAATTAAATTAAACAAAATACCAAACACTAAAACCCTC						cg	R	B	C	II	1	12	98771719	Mus musculus	mm10	ATTCTAaACCCCAaTTAAaTTAaACAaAaTACCAAaCACTAAAACCCTCr	CTCTGCTCAAACATTCTAGACCCCAGTTAAGTTAGACAGAGTACCAAGCACTAAAACCCT[CG]GCTTCTTTTGTCTATGCTGAGCTGTACCAGAGCTAAGCTAGTGAGAAAGTTCAAAGGATC	CTCTGCTCAAACATTCTAGACCCCAGTTAAGTTAGACAGAGTACCAAGCACTAAAACCCT[CG]GCTTCTTTTGTCTATGCTGAGCTGTACCAGAGCTAAGCTAGTGAGAAAGTTCAAAGGATC	GRCm10															FALSE	Zc3h14	NM_001160107.1	chr12	98746967	98787774	40808	+
1.06353	-3.56996	7.70489	1.36294e-06	0.00123015	5.60847	cg44678083	81742212	CTCCRTCAAACCATTAAATATAAAAACATTCAATACTATATACTCAATAC						cg	R	B	C	II	1	7	68065133	Mus musculus	mm10	TCCrTCAaaCCATTaAaTATaAaAaCATTCAaTaCTaTaTaCTCAaTACr	CTTCCTAGCATCTCCGTCAGGCCATTGAGTATGAGAGCATTCAGTGCTGTGTGCTCAGTA[CG]AGGTAGTAACATCTATTCAGCGTTCAGTACATCCACTCTGTTCAAGAACAATGTATTCAA	CTTCCTAGCATCTCCGTCAGGCCATTGAGTATGAGAGCATTCAGTGCTGTGTGCTCAGTA[CG]AGGTAGTAACATCTATTCAGCGTTCAGTACATCCACTCTGTTCAAGAACAATGTATTCAA	GRCm10															FALSE	Igf1r	NM_010513.2	chr7	67952256	68233667	281412	+
0.80594	1.23647	7.69742	1.37908e-06	0.00123698	5.59751	cg29188645	87795593	ATCTATAACCAATAAAAAACAAAACCTAACAAATCATTTAAAACTTAATC						cg	R	B	C	II	1	11	4192808	Mus musculus	mm10	TCTATAaCCAATaaaAaaCAaAaCCTaaCAAATCATTTAaAaCTTaATCr	ACTCTGAAGAAATCTATAGCCAATGGGAGGCAGAGCCTGGCAAATCATTTAGAGCTTGAT[CG]TGACTAGCCCCGTGAGTGAGAGGTGGAAAGGCCTCTTACAGGGCCTATCCTAGAGTCCTT	ACTCTGAAGAAATCTATAGCCAATGGGAGGCAGAGCCTGGCAAATCATTTAGAGCTTGAT[CG]TGACTAGCCCCGTGAGTGAGAGGTGGAAAGGCCTCTTACAGGGCCTATCCTAGAGTCCTT	GRCm10															FALSE	Tbc1d10a	NM_134023.1	chr11	4186832	4215505	28674	+
0.629582	1.04282	7.69633	1.38147e-06	0.00123698	5.5959	cg31401703	97745498	AAATCTAAACTAAACTACTTCCTCCTAAAACCTCTCTCCCAAACTTATAC						cg	F	T	C	II	1	13	31178114	Mus musculus	mm10	AaTCTaaaCTAaaCTaCTTCCTCCTaAaaCCTCTCTCCCAaaCTTaTaCr	ATGTTTTGTCACCGTGGCAGAACCTTAAGATGCTATGCAGGATCCAAGGAGAAGGCATCA[CG]CACAAGCCTGGGAGAGAGGCCTCAGGAGGAAGCAGCCTAGCCCAGACTTCCACCTTGGAC	ATGTTTTGTCACCGTGGCAGAACCTTAAGATGCTATGCAGGATCCAAGGAGAAGGCATCA[CG]CACAAGCCTGGGAGAGAGGCCTCAGGAGGAAGCAGCCTAGCCCAGACTTCCACCTTGGAC	GRCm10															FALSE	.	.	.	.	.	.	.
0.686319	0.411056	7.69323	1.38823e-06	0.00123698	5.59135	cg40782994	36715879	ATTCACRAATCCAAAACATTTTAACTTATAATAACAAAAATACCACCAAC						cg	R	B	C	II	1	4	40700270	Mus musculus	mm10	TTCACrAATCCAaAaCATTTTaaCTTaTaaTAaCAAAAaTaCCACCAaCr	GTGTGTCTTACATTCACGAATCCAGAGCATTTTGGCTTGTGGTAGCAAAAGTGCCACCAG[CG]GGGAGTTCAGAGCGGATTAACAATTTACCAATTCAGTTCAAAGTTCTCTGTCAGTCAGAA	GTGTGTCTTACATTCACGAATCCAGAGCATTTTGGCTTGTGGTAGCAAAAGTGCCACCAG[CG]GGGAGTTCAGAGCGGATTAACAATTTACCAATTCAGTTCAAAGTTCTCTGTCAGTCAGAA	GRCm10	chr4:40703052-40703371														FALSE	Aptx	NM_025545.4	chr4	40682077	40702916	20840	-
1.0446	2.06414	7.69028	1.39471e-06	0.00123698	5.58702	cg33437362	37678451	AATTCATATCATTAAAAATATACTAACAATACATATACACTACCTCCACA	74787543	AATTCATATCGTTAAAAATATACTAACGATACGTATACACTACCTCCACG	A	Red	R	cg	F	T	C	I	1	15	66940228	Mus musculus	mm10	aaTTCATaTCrTTaAaaATaTaCTaaCraTACrTaTaCACTACCTCCACr	AATGGTGACAAGCCTTCCCCCTCTCTTCCCTCTGTCACTACAGGAGGAGATACACAACAA[CG]TGGAGGTAGTGCACACGTACCGCCAGCACATCCTCAACGACATGAACCCGAGCAACCTAC	AATGGTGACAAGCCTTCCCCCTCTCTTCCCTCTGTCACTACAGGAGGAGATACACAACAA[CG]TGGAGGTAGTGCACACGTACCGCCAGCACATCCTCAACGACATGAACCCGAGCAACCTAC	GRCm10															FALSE	Ndrg1	NM_008681.2	chr15	66929317	66969641	40325	-
0.738225	0.0674121	7.68999	1.39535e-06	0.00123698	5.5866	cg40824517	30784453	CTCACCTTCTCCACATAAAACTCATAATCTTAAAACCTAATTTATACCTC						cg	R	B	C	II	1	4	44943799	Mus musculus	mm10	TCACCTTCTCCACATaAaACTCATAaTCTTaaAaCCTaaTTTaTaCCTCr	GGTCCTGGTGGCTCACCTTCTCCACATGAGACTCATAGTCTTGGAGCCTGGTTTGTGCCT[CG]CTTATCCATCTGTGTCCTGAAGGACAGAGACTTGGGACCACAGTTTCTTCACTTGGATCT	GGTCCTGGTGGCTCACCTTCTCCACATGAGACTCATAGTCTTGGAGCCTGGTTTGTGCCT[CG]CTTATCCATCTGTGTCCTGAAGGACAGAGACTTGGGACCACAGTTTCTTCACTTGGATCT	GRCm10															FALSE	.	.	.	.	.	.	.
-0.55359	-0.350896	-7.68781	1.40015e-06	0.00123698	5.5834	cg29914233	6780190	TCAAATAACCTATTATCTTCACTCTTAACTAATAAATATTCAAACTTCAC						cg	R	B	C	II	1	11	89202632	Mus musculus	mm10	CAaATaaCCTaTTATCTTCACTCTTaaCTaATaAATaTTCAaaCTTCACr	TGTTTCCTCACTCAGATGGCCTGTTATCTTCACTCTTGGCTGATGAATGTTCAGGCTTCA[CG]TGCGTGGATGACTGTCTCCTGCCTACTTCTATTGGAACTCTACATCCTTTAAGTAAACCA	TGTTTCCTCACTCAGATGGCCTGTTATCTTCACTCTTGGCTGATGAATGTTCAGGCTTCA[CG]TGCGTGGATGACTGTCTCCTGCCTACTTCTATTGGAACTCTACATCCTTTAAGTAAACCA	GRCm10															FALSE	.	.	.	.	.	.	.
0.4336	-1.14714	7.68585	1.4045e-06	0.00123698	5.58051	cg30272140	35748330	AACAACCAATACCAACTAAACAAAACCATTTACAAAACTACTATACAATC						cg	R	B	C	II	1	11	119220188	Mus musculus	mm10	aCAaCCAaTACCAaCTAaaCAaAaCCATTTaCAAAACTACTaTaCAATCr	AGGCTGTTCTAGGCAGCCAGTACCAGCTAGGCAGAGCCATTTGCAAAACTACTGTGCAAT[CG]GAAAGAAAAGAACAGCATGGCTTCCTCGCCTCAGAGACAGCTCACAAAAACCTCCCTAAG	AGGCTGTTCTAGGCAGCCAGTACCAGCTAGGCAGAGCCATTTGCAAAACTACTGTGCAAT[CG]GAAAGAAAAGAACAGCATGGCTTCCTCGCCTCAGAGACAGCTCACAAAAACCTCCCTAAG	GRCm10															FALSE	Tbc1d16	NM_172443.3	chr11	119143042	119228499	85458	-
-1.20375	-4.27737	-7.68551	1.40526e-06	0.00123698	5.58001	cg38294001	70661258	AAAAACCATATAATTAATCCACAAAATCCACAACAACTTTTTCTCTATCA	30637566	AAAAACCGTATAATTAATCCGCAAAATCCACGACAACTTTTTCTCTATCG	G	Grn	G	cg	R	B	C	I	1	2	37359238	Mus musculus	mm10	aAAaaCCrTaTaATTaaTCCrCAaAaTCCACraCAaCTTTTTCTCTaTCr	GCCGCGACGCCGGAAGGCCGTGTGATTGGTCCGCAGAGTCCACGGCAGCTTTTTCTCTGT[CG]CTCAAGGCTTTCGGCCACTTCTCTTTCTCTAGGCGAGCGTCCTTTGTTGGTGACAGGAGC	GCCGCGACGCCGGAAGGCCGTGTGATTGGTCCGCAGAGTCCACGGCAGCTTTTTCTCTGT[CG]CTCAAGGCTTTCGGCCACTTCTCTTTCTCTAGGCGAGCGTCCTTTGTTGGTGACAGGAGC	GRCm10			chr2:37359044-37359355	chr2	37359044	37359355	311	28	186	18	59.8	1.02			FALSE	Pdcl	NM_026176.3	chr2	37350073	37359332	9260	-
-0.789482	-4.24332	-7.68364	1.40941e-06	0.00123698	5.57726	cg37645973	96794939	CCCCAACTAAAAATCCTATTTTTAAATTAACTTTCCAATCRATTTCTTTC						cg	F	T	C	II	1	1	156035269	Mus musculus	mm10	CCCAaCTaAAAATCCTaTTTTTAAaTTAACTTTCCAaTCraTTTCTTTCr	CTCGTAGCATCCGCCTAGAAATGATCTCGTTTTCCCAATCTTGGTGAAAAAAAAAAAAAA[CG]AAAGAAACCGACTGGAAAGTTAACTTAAAAACAGGATTTTCAGCTGGGGACTTGGGGCCC	CTCGTAGCATCCGCCTAGAAATGATCTCGTTTTCCCAATCTTGGTGAAAAAAAAAAAAAA[CG]AAAGAAACCGACTGGAAAGTTAACTTAAAAACAGGATTTTCAGCTGGGGACTTGGGGCCC	GRCm10		chr1:156035532-156036386													FALSE	Tor1aip1	NM_001160018.1	chr1	156004598	156036480	31883	-
0.531042	-0.665725	7.67807	1.42187e-06	0.0012441	5.56907	cg29763991	45699373	TAATTTTCAATCCAATAACCRACCTTTAATATCTCCTACTCACAACATTC						cg	R	B	C	II	1	11	75298729	Mus musculus	mm10	AaTTTTCAaTCCAaTAaCCraCCTTTaATATCTCCTaCTCACAaCATTCr	AGATGGTGATCTAGTTTTCAGTCCAGTAGCCGGCCTTTGATATCTCCTGCTCACAGCATT[CG]GTCATCGCCCCAGTGCACGAGGGCTAGTGAACAAGAATGTCCTCTGAGGTCGCTGAACCA	AGATGGTGATCTAGTTTTCAGTCCAGTAGCCGGCCTTTGATATCTCCTGCTCACAGCATT[CG]GTCATCGCCCCAGTGCACGAGGGCTAGTGAACAAGAATGTCCTCTGAGGTCGCTGAACCA	GRCm10															FALSE	.	.	.	.	.	.	.
0.60446	1.31357	7.67568	1.42726e-06	0.001245	5.56555	cg32472261	38803943	CTCTTTCTAACAATTCATCTATTTTAATAAAACTAACTAACACCCCTTAC						cg	R	B	C	II	1	14	51096573	Mus musculus	mm10	TCTTTCTAaCAaTTCATCTATTTTAaTaAAACTaACTAACACCCCTTACr	TTTCCTCTGTGCTCTTTCTAGCAGTTCATCTATTTTAGTGAAACTGACTAACACCCCTTA[CG]CTTTCTGGACTCAAACTTGCACATTAAAAAGAAAACGAGTAAGAGTTAAAATTTAAAATG	TTTCCTCTGTGCTCTTTCTAGCAGTTCATCTATTTTAGTGAAACTGACTAACACCCCTTA[CG]CTTTCTGGACTCAAACTTGCACATTAAAAAGAAAACGAGTAAGAGTTAAAATTTAAAATG	GRCm10															FALSE	Ang	NM_001161731.2	chr14	51091076	51102009	10934	+
0.608468	-1.02385	7.66891	1.4426e-06	0.00125323	5.5556	cg42055356	56795354	AACTCCAACRAACTATCAAATACCCRACRTACTTAAAATAAAATAACTAC						cg	F	T	C	II	1	5	37651050	Mus musculus	mm10	ACTCCAaCrAaCTaTCAAATACCCrACrTaCTTAaAATAaAaTAaCTaCr	TTATTCTGAACGTAAACAGAGCTGGGTTAAAGAGCAGGAGTTTTGCTAGTTAATGGTTAA[CG]CAGCTACTCTATTCTAAGCACGTCGGGTATTTGACAGCTCGCTGGAGTCTGACTTTGGCT	TTATTCTGAACGTAAACAGAGCTGGGTTAAAGAGCAGGAGTTTTGCTAGTTAATGGTTAA[CG]CAGCTACTCTATTCTAAGCACGTCGGGTATTTGACAGCTCGCTGGAGTCTGACTTTGGCT	GRCm10															FALSE	Stk32b	NM_022416.2	chr5	37446824	37717153	270330	-
-0.586525	0.44682	-7.66766	1.44545e-06	0.00125323	5.55376	cg39764374	35771373	CCTACTAAAAATTACCTACCAACCTCCCTCTAAAAACTCRAATCAAAAAC						cg	F	T	C	II	1	3	53655889	Mus musculus	mm10	CTaCTaAAaATTaCCTACCAaCCTCCCTCTaAAaACTCraATCAaaAaCr	GCGAAAGGGTCTGAGGCTGCTCCTTCAGGGTCCACTATCTCCAGCTCTAGTTCAAACAGA[CG]CTCCTGATCCGAGTCTTCAGAGGGAGGCTGGTAGGCAATCTTCAGCAGGCGCAAATCCCG	GCGAAAGGGTCTGAGGCTGCTCCTTCAGGGTCCACTATCTCCAGCTCTAGTTCAAACAGA[CG]CTCCTGATCCGAGTCTTCAGAGGGAGGCTGGTAGGCAATCTTCAGCAGGCGCAAATCCCG	GRCm10		chr3:53656616-53657328													TRUE	Frem2	NM_172862.3	chr3	53513937	53657355	143419	-
0.819967	-0.830014	7.6624	1.45754e-06	0.0012599	5.546	cg47743999	92729853	ACACAACAAAAAACCATTAATATTTACATTAACCATAATAAACTAAACCA	3710127	GCGCGACAAAAAACCGTTAATATTTACGTTAACCGTAATAAACTAAACCG	A	Red	R	cg	F	T	C	I	1	X	74368472	Mus musculus	mm10	rCrCraCAaaaaACCrTTaaTaTTTaCrTTaaCCrTAaTaaACTaaaCCr	TTACCTGTAGGCTACATTCCCGGCCCTGGAGCGCCTTCACGGTCAGCTGCATGGTGTCCA[CG]GCCCAGTCCACTACGGCCAACGCAAACACCAACGGTCCCCTGCCGCGCGCCGCCGCCCCG	TTACCTGTAGGCTACATTCCCGGCCCTGGAGCGCCTTCACGGTCAGCTGCATGGTGTCCA[CG]GCCCAGTCCACTACGGCCAACGCAAACACCAACGGTCCCCTGCCGCGCGCCGCCGCCCCG	GRCm10			chrX:74368245-74368698	chrX	74368245	74368698	453	35	287	15.5	63.4	0.78			FALSE	Ubl4a	NM_145405.2	chrX	74365717	74368548	2832	-
0.526276	-1.09945	7.65631	1.47166e-06	0.00126261	5.53703	cg29739425	67628250	AACCTCTACCTAAAAAATCTAATCTTAAAAAACAATCAAAACCCAACCTC						cg	R	B	C	II	1	11	72401263	Mus musculus	mm10	ACCTCTaCCTaAaAAATCTaATCTTaaaAAACAaTCAaaaCCCAaCCTCr	GCCCTGACCTTGACCTCTGCCTGAGAAATCTGATCTTGGGAAACAGTCAGGGCCCAGCCT[CG]CTACGCTATGGCTGAATGACCATGGCCATGGTTGAGCCTGCTCTAGGAGCTCATTGGGCT	GCCCTGACCTTGACCTCTGCCTGAGAAATCTGATCTTGGGAAACAGTCAGGGCCCAGCCT[CG]CTACGCTATGGCTGAATGACCATGGCCATGGTTGAGCCTGCTCTAGGAGCTCATTGGGCT	GRCm10															FALSE	Smtnl2	NM_177776.3	chr11	72390113	72411713	21601	-
0.672761	0.65576	7.65464	1.47555e-06	0.00126261	5.53457	cg31422584	5779931	CACATTTACTATATTACTCAAAATAATCAAAACACAAAAACAACTCTACC						cg	F	T	C	II	1	13	34256625	Mus musculus	mm10	ACATTTACTaTaTTACTCAAAATAaTCAAaACACAaAAACAACTCTACCr	GAATGCTACTTTTCTGTGTGGTTTCTGCCCAATTTGGCTTATCCATTCATACGATGATGA[CG]GTAGAGTTGTTTCTGTGTCTTGACTATTTTGAGTAACACAGTAAATGTGGGAACTCTCAC	GAATGCTACTTTTCTGTGTGGTTTCTGCCCAATTTGGCTTATCCATTCATACGATGATGA[CG]GTAGAGTTGTTTCTGTGTCTTGACTATTTTGAGTAACACAGTAAATGTGGGAACTCTCAC	GRCm10															FALSE	Slc22a23	NM_001033167.3	chr13	34179157	34345182	166026	-
0.448473	-0.0808441	7.65432	1.47629e-06	0.00126261	5.5341	cg47740318	19632343	CAAAATAAACACAAAATATTTAAAACAAACTACAACAACCTTAAAATCCA	94621226	CGAAATAAACGCGAAATATTTAAAACAAACTACAACAACCTTAAAATCCG	T	Red	R	cg	R	B	C	I	1	X	73921643	Mus musculus	mm10	CraaATAAACrCrAaATaTTTAAAaCAaaCTaCAaCAaCCTTAAaaTCCr	AATTAGGAAACGCGGGATAAACGCGAGATGTTTAAAGCAGGCTGCAGCAGCCTTAAGGTC[CG]GCGTCGGCAGACCTACAGGACCAAAGCACCAGGTCCCTCGATAACATGCTCACACGGTCA	AATTAGGAAACGCGGGATAAACGCGAGATGTTTAAAGCAGGCTGCAGCAGCCTTAAGGTC[CG]GCGTCGGCAGACCTACAGGACCAAAGCACCAGGTCCCTCGATAACATGCTCACACGGTCA	GRCm10			chrX:73921592-73922345	chrX	73921592	73922345	753	62	469	16.5	62.3	0.85			FALSE	Naa10	NM_001177965.1	chrX	73916869	73921944	5076	-
1.43968	-3.51928	7.65345	1.47833e-06	0.00126261	5.53282	cg34910086	4668452	CCTCTCCTACTTAAATAACTATAATAATTCTAAAACTAATACATACCCAC						cg	R	B	C	II	1	17	39846534	Mus musculus	mm10	CTCTCCTACTTaaATAACTaTaaTAATTCTAaAaCTAATACATaCCCACr	GGTCGCTCGCTCCTCTCCTACTTGGATAACTGTGGTAATTCTAGAGCTAATACATGCCCA[CG]GGCGCTGACCCCCCTTCCCGGGGGGGGGGGGGGATGCGTGCATTTATCAGATCAAAACCA	GGTCGCTCGCTCCTCTCCTACTTGGATAACTGTGGTAATTCTAGAGCTAATACATGCCCA[CG]GGCGCTGACCCCCCTTCCCGGGGGGGGGGGGGGATGCGTGCATTTATCAGATCAAAACCA	GRCm10		chr17:39848220-39848823											chr17:39843168-39846346		TRUE	.	.	.	.	.	.	.
0.948169	2.37578	7.64945	1.48772e-06	0.00126389	5.52692	cg31839655	79799218	TTACCTAATAATACTACTCTCTACTCCTATTCATCACATCCATATATCAC						cg	F	T	C	II	1	13	81326690	Mus musculus	mm10	TACCTaATaATACTaCTCTCTaCTCCTaTTCATCACATCCATATaTCACr	TGTTGTTGTTTGTGTGGGTAATAAATTCTCTGGTAGACCCAAAGTTCTTATCAGAAATCA[CG]TGACATATGGATGTGATGAACAGGAGCAGAGAGCAGTATCATCAGGTAAAAATAAGTGAA	TGTTGTTGTTTGTGTGGGTAATAAATTCTCTGGTAGACCCAAAGTTCTTATCAGAAATCA[CG]TGACATATGGATGTGATGAACAGGAGCAGAGAGCAGTATCATCAGGTAAAAATAAGTGAA	GRCm10															FALSE	Adgrv1	NM_054053.4	chr13	81095067	81633144	538078	-
0.64232	0.714588	7.64866	1.4896e-06	0.00126389	5.52575	cg42852125	87657925	CTTATCTAAACATACTTTAACTAAACCCACRAAAAAATCATTACAAACTC						cg	R	B	C	II	1	5	131632173	Mus musculus	mm10	TTaTCTAaACATACTTTAaCTAAaCCCACraaaaAaTCATTACAaaCTCr	AGCCAGCAAAACTTGTCTAGACATACTTTAGCTAAGCCCACGGGGGAGTCATTACAGGCT[CG]CTTTATGGGGACATAATCGAGGTTATATATACAACACACACACACACTCTCTCTCTCTCT	AGCCAGCAAAACTTGTCTAGACATACTTTAGCTAAGCCCACGGGGGAGTCATTACAGGCT[CG]CTTTATGGGGACATAATCGAGGTTATATATACAACACACACACACACTCTCTCTCTCTCT	GRCm10															FALSE	Auts2	NM_177047.3	chr5	131437681	132542343	1104663	-
0.505608	-2.05914	7.64718	1.49309e-06	0.00126389	5.52357	cg30160811	51601161	ACTAATCCATCAAATCACAAATCAAAATATCCCCRATAATAACAAAAACC						cg	R	B	C	II	1	11	110961733	Mus musculus	mm10	CTAaTCCATCAaATCACAaATCAAAATaTCCCCrATaaTAACAAaAACCr	AAATTCACACAGCTAGTCCATCAGATCACAGATCAAAATGTCCCCGATGGTAACAAGAAC[CG]CAACCTGGACTCCTATAATAAGTCACTGCTCAAACATCACTTCTCTGCTTGACTGCCTTT	AAATTCACACAGCTAGTCCATCAGATCACAGATCAAAATGTCCCCGATGGTAACAAGAAC[CG]CAACCTGGACTCCTATAATAAGTCACTGCTCAAACATCACTTCTCTGCTTGACTGCCTTT	GRCm10															FALSE	.	.	.	.	.	.	.
0.905996	1.71937	7.64267	1.5038e-06	0.00126583	5.51691	cg40964408	51719382	TAACCTCTCTAAACCTCTATTTCATAATTACTAAAAATTATATTAATTTC						cg	R	B	C	II	1	4	62517111	Mus musculus	mm10	AACCTCTCTaAaCCTCTATTTCATAATTaCTAAaAaTTATaTTaATTTCr	AGCGAGTTCCATAACCTCTCTGAGCCTCTATTTCATAATTGCTAAGAGTTATGTTGATTT[CG]CAATGTAACTTCAATGAGATAAAGTACTGCCTTTGGCACCTTGCACCTAGGTAGAGGGAG	AGCGAGTTCCATAACCTCTCTGAGCCTCTATTTCATAATTGCTAAGAGTTATGTTGATTT[CG]CAATGTAACTTCAATGAGATAAAGTACTGCCTTTGGCACCTTGCACCTAGGTAGAGGGAG	GRCm10	chr4:62519594-62520176														FALSE	Alad	NM_001276446.1	chr4	62505983	62519909	13927	-
0.55327	-0.940366	7.63641	1.51879e-06	0.00126583	5.50767	cg46442367	62708231	AATTCCRATCTAAACTAAATCATCCTCRAAAATAACTCTTTTAAACCTCC						cg	F	T	C	II	1	9	14173669	Mus musculus	mm10	ATTCCraTCTaaACTaaATCATCCTCrAAaATaaCTCTTTTAaACCTCCr	GCGTGATGGTTCTTTGTTTTAAGAAAACATCTGTATTTTAGCTGGGTAGCAGGTTTTGAG[CG]GAGGTCTAAAAGAGCCATCTTCGAGGATGATCCAGTCCAGACCGGAATCAAAGAGGGAGC	GCGTGATGGTTCTTTGTTTTAAGAAAACATCTGTATTTTAGCTGGGTAGCAGGTTTTGAG[CG]GAGGTCTAAAAGAGCCATCTTCGAGGATGATCCAGTCCAGACCGGAATCAAAGAGGGAGC	GRCm10															FALSE	.	.	.	.	.	.	.
0.548708	1.37611	7.63638	1.51886e-06	0.00126583	5.50762	cg34805557	72784863	AATACAAATACTAACTAAAAACATTATAAATAAATACCAAACCCAAATCC						cg	F	T	C	II	1	17	29423057	Mus musculus	mm10	ATACAAaTaCTaACTaaAAaCATTaTaaaTaaaTaCCAaaCCCAaATCCr	GCCTAGAGATCCTGCCCACCTGCAGAGCCTGGCTCACAACATACCAGTGTATGGTGTACA[CG]GATCTGGGCCTGGCACCCACCCACAATGCTTCCAGTCAGCACTTGTATCCAGACAATAAT	GCCTAGAGATCCTGCCCACCTGCAGAGCCTGGCTCACAACATACCAGTGTATGGTGTACA[CG]GATCTGGGCCTGGCACCCACCCACAATGCTTCCAGTCAGCACTTGTATCCAGACAATAAT	GRCm10															FALSE	.	.	.	.	.	.	.
0.776738	0.459482	7.63573	1.52042e-06	0.00126583	5.50667	cg29776260	87675229	AATACCCRTAAATAACTATAAACAACTTAAAAAAACTCRACTACATCATC						cg	R	B	C	II	1	11	76279778	Mus musculus	mm10	aTaCCCrTaAaTaaCTaTaAaCAaCTTAaaaaaaCTCraCTaCATCATCr	CTCTTAACAAGAGTGCCCGTGAGTGGCTGTGAGCAGCTTAGGGGGGCTCGGCTGCATCAT[CG]CACAGAAACCTGATCCTGGGCTCAGATCACGCATTCTTTTACTGTTATTGTTTTGAGACA	CTCTTAACAAGAGTGCCCGTGAGTGGCTGTGAGCAGCTTAGGGGGGCTCGGCTGCATCAT[CG]CACAGAAACCTGATCCTGGGCTCAGATCACGCATTCTTTTACTGTTATTGTTTTGAGACA	GRCm10															FALSE	Nxn	NM_008750.5	chr11	76257225	76399141	141917	-
0.783822	-1.61104	7.6351	1.52194e-06	0.00126583	5.50573	cg29948928	57731870	CCAATACCTATAACTAACAAACCCTTAACATAATACATAAAATCTTCCCC						cg	F	T	C	II	1	11	94159486	Mus musculus	mm10	CAaTaCCTaTaaCTAaCAaaCCCTTaACATaaTaCATAAAATCTTCCCCr	CTGTCATTTGCCAGCAAAGGTCATGAAGTTTCTTCCTGGAGGTTTCTAAGAACAGGGGCA[CG]GGGAAGATTTTATGCACCATGTCAAGGGCCTGCTAGCCACAGGCACTGGCAAGGAACAGG	CTGTCATTTGCCAGCAAAGGTCATGAAGTTTCTTCCTGGAGGTTTCTAAGAACAGGGGCA[CG]GGGAAGATTTTATGCACCATGTCAAGGGCCTGCTAGCCACAGGCACTGGCAAGGAACAGG	GRCm10															FALSE	.	.	.	.	.	.	.
-1.09859	-4.61526	-7.63335	1.52618e-06	0.00126583	5.50315	cg30257539	40647307	AACTCAAAAAACACATTACAATACRACTCCTTTAAACRTCRTAATAACAC						cg	F	T	C	II	1	11	118290163	Mus musculus	mm10	ACTCAaaaAaCACATTaCAaTaCraCTCCTTTAAACrTCrTaaTaACACr	CAGCGTCCGATCCGGGCCGGGCCAGCATGCGCACCATCCGGGCCTCCAGAGCCTCACACA[CG]TGTCACCACGACGTTTAAAGGAGCCGCACTGCAATGTGCTCCCTGAGTCCGCGTGAAGGG	CAGCGTCCGATCCGGGCCGGGCCAGCATGCGCACCATCCGGGCCTCCAGAGCCTCACACA[CG]TGTCACCACGACGTTTAAAGGAGCCGCACTGCAATGTGCTCCCTGAGTCCGCGTGAAGGG	GRCm10			chr11:118289860-118290551	chr11	118289860	118290551	691	78	461	22.6	66.7	1.04			FALSE	Usp36	NM_001033528.1	chr11	118259652	118290244	30593	-
-0.962114	-0.146407	-7.63156	1.53052e-06	0.00126583	5.5005	cg29908789	90700285	TCTTCRAAACTTTCRTTATAAACACRACRTCCTCTAAAATTATTATTAAC						cg	R	B	C	II	1	11	88803740	Mus musculus	mm10	CTTCraAaCTTTCrTTaTAAaCACrACrTCCTCTaaAaTTaTTaTTAACr	TTCAAATGAATTCTTCGGAGCTTTCGTTGTAAGCACGACGTCCTCTGGAGTTGTTGTTAA[CG]TTTCAGACCTGAGCAATCGGGAAGCGAAGGCCTATTGTCCGGTTTAGCTAGTGTAAATGT	TTCAAATGAATTCTTCGGAGCTTTCGTTGTAAGCACGACGTCCTCTGGAGTTGTTGTTAA[CG]TTTCAGACCTGAGCAATCGGGAAGCGAAGGCCTATTGTCCGGTTTAGCTAGTGTAAATGT	GRCm10															FALSE	.	.	.	.	.	.	.
0.569754	-0.576055	7.62907	1.53659e-06	0.00126583	5.49681	cg35299817	97751303	CAATAACTAAACACTTTCCTAACATTCCTAAAATCCTAAACTTCATCTCC						cg	R	B	C	II	1	17	85044947	Mus musculus	mm10	AaTaaCTaAaCACTTTCCTAACATTCCTaaAaTCCTaaACTTCATCTCCr	GGTGTGGGGTTCAGTGGCTGAGCACTTTCCTAACATTCCTGGAGTCCTGGACTTCATCTC[CG]GCACCTCAAACACACACACACACACACACACACACACACACACACACACACACACACACA	GGTGTGGGGTTCAGTGGCTGAGCACTTTCCTAACATTCCTGGAGTCCTGGACTTCATCTC[CG]GCACCTCAAACACACACACACACACACACACACACACACACACACACACACACACACACA	GRCm10															FALSE	Slc3a1	NM_009205.2	chr17	85028346	85064241	35896	+
0.710317	-1.08956	7.62858	1.53776e-06	0.00126583	5.4961	cg47998096	43743405	AACTTACAAAAAAACTTACCAATTTAAATTTATTTCTCATCTCCTCTTCA	73699361	AACTTACGAAAAAACTTACCAATTTAAATTTATTTCTCGTCTCCTCTTCG	A	Red	R	cg	R	B	C	I	1	X	129750086	Mus musculus	mm10	aaCTTaCraaAAaACTTACCAaTTTaaaTTTaTTTCTCrTCTCCTCTTCr	CGAGACCAGCGGGGCTTGCGGGAAGACTTACCAGTTTGGGTTTGTTTCTCGTCTCCTCTT[CG]TTGGCGGCCCGGTTCCCCGCGCCTCGCTTGTTGCTCCGGCCCCCGCCGTGTTCCTCGCCG	CGAGACCAGCGGGGCTTGCGGGAAGACTTACCAGTTTGGGTTTGTTTCTCGTCTCCTCTT[CG]TTGGCGGCCCGGTTCCCCGCGCCTCGCTTGTTGCTCCGGCCCCCGCCGTGTTCCTCGCCG	GRCm10			chrX:129749591-129750362	chrX	129749591	129750362	771	65	470	16.9	61	0.91			TRUE	Diaph2	NM_172493.2	chrX	129749741	130465834	716094	+
0.733431	-0.702102	7.62783	1.53961e-06	0.00126583	5.49498	cg29747923	37794339	CCCATACTCCAATAAATAATCCTATACCCAAAAACACTAAATCTACACTC						cg	F	T	C	II	1	11	73236849	Mus musculus	mm10	CCATACTCCAATaaATAATCCTATACCCAAaAACACTAaaTCTACACTCr	GCTACCCCATGTCACCCTCTGAACTTCATGTCTTCCTCCTCCTCTTCTTCATGAATGAAA[CG]AGTGTAGACCTAGTGTTCTTGGGTATAGGATTATCCATTGGAGTATGGGCAACCTGCCAG	GCTACCCCATGTCACCCTCTGAACTTCATGTCTTCCTCCTCCTCTTCTTCATGAATGAAA[CG]AGTGTAGACCTAGTGTTCTTGGGTATAGGATTATCCATTGGAGTATGGGCAACCTGCCAG	GRCm10															FALSE	Trpv1	NM_001001445.2	chr11	73234148	73261322	27175	+
0.721976	-1.08673	7.62143	1.55533e-06	0.00127493	5.48551	cg30048899	53616300	TAACACTATCAAACAATATACCCAAATTAATAATTAACTCTACCAATAAC						cg	F	T	C	II	1	11	101367519	Mus musculus	mm10	AaCACTaTCAAaCAaTaTaCCCAAaTTAATAATTaaCTCTaCCAATaaCr	CAAACATGTTCAGGGTGATTTACGTAAAATAGCAAAACAGGCACACAAAAACAGCCTGAT[CG]CCATTGGCAGAGCCAATTATTAACTTGGGCACACTGCTTGACAGTGCTAGAGGCTGCCCT	CAAACATGTTCAGGGTGATTTACGTAAAATAGCAAAACAGGCACACAAAAACAGCCTGAT[CG]CCATTGGCAGAGCCAATTATTAACTTGGGCACACTGCTTGACAGTGCTAGAGGCTGCCCT	GRCm10															FALSE	G6pc	NM_008061.4	chr11	101367515	101367715	201	+
0.630928	-0.836532	7.61706	1.56615e-06	0.00127493	5.47905	cg28904815	97701339	AATTTTCCATAAATAAAAATTCTAACATAAAATTCTTAATTTCCCTCACC						cg	R	B	C	II	1	10	99223065	Mus musculus	mm10	ATTTTCCATAaaTAAaAaTTCTaaCATAaAATTCTTaATTTCCCTCACCr	GGGAACTCTAAAATTTTCCATAGGTAAGAGTTCTGGCATAGAATTCTTGATTTCCCTCAC[CG]CCTTCAGCAGCCAGGACTTCAGATCTGAACAATGGTTAATGTTTAAAAAGGCACAGTGTG	GGGAACTCTAAAATTTTCCATAGGTAAGAGTTCTGGCATAGAATTCTTGATTTCCCTCAC[CG]CCTTCAGCAGCCAGGACTTCAGATCTGAACAATGGTTAATGTTTAAAAAGGCACAGTGTG	GRCm10															FALSE	.	.	.	.	.	.	.
0.578201	0.00498086	7.61677	1.56687e-06	0.00127493	5.47863	cg39771956	56699466	TCCAACACATATATACATCTTTAAAACCATCTACAATATATTTTACTATC						cg	R	B	C	II	1	3	54651677	Mus musculus	mm10	CCAaCACATATATaCATCTTTAAAaCCATCTaCAaTaTATTTTaCTaTCr	CCTCTCCAAGTTCCAGCACATATATGCATCTTTAAAGCCATCTGCAGTGTATTTTGCTGT[CG]GGAGCCATTTGCTGCTTCTCTGAAGCAGAGGGGAAAAAGAGAGAGAAAAAGTCTGCCTTC	CCTCTCCAAGTTCCAGCACATATATGCATCTTTAAAGCCATCTGCAGTGTATTTTGCTGT[CG]GGAGCCATTTGCTGCTTCTCTGAAGCAGAGGGGAAAAAGAGAGAGAAAAAGTCTGCCTTC	GRCm10															FALSE	.	.	.	.	.	.	.
0.506947	-0.347785	7.61575	1.5694e-06	0.00127493	5.47712	cg33915481	32653137	AAACACCAATATAACAATACAAATAAAAATCAACTACAAATATATACTTC						cg	R	B	C	II	1	16	11569201	Mus musculus	mm10	AACACCAaTATaACAaTaCAaATaaAaaTCAaCTaCAaATaTaTaCTTCr	GCACGATCCCAAAACACCAGTATGACAGTGCAGATGGAGGTCAGCTGCAGATGTGTGCTT[CG]TGGGCCTGAGGGAGGTATTCCTCAACTTCACACTGAGTCATCAAAAGTGCTCACAAATGA	GCACGATCCCAAAACACCAGTATGACAGTGCAGATGGAGGTCAGCTGCAGATGTGTGCTT[CG]TGGGCCTGAGGGAGGTATTCCTCAACTTCACACTGAGTCATCAAAAGTGCTCACAAATGA	GRCm10															FALSE	Snx29	NM_028964.4	chr16	11322903	11755473	432571	+
0.632539	1.18238	7.61257	1.57735e-06	0.00127493	5.47241	cg40972581	96706420	AACATAAACCTTAAAACAAATATATATACCCRTAAACTACATAATACTAC						cg	F	T	C	II	1	4	63256893	Mus musculus	mm10	ACATAaACCTTaAaaCAAaTaTATATaCCCrTaaACTaCATaaTaCTaCr	CTGCCATCCTGTGCTGCCCTCCCTGGTGTGAGCGTATGTGCCTTTGGACTACATCGTGAA[CG]CAGCACCATGCAGTCCACGGGCATATACACTTGCCTCAAGGTCTATGTCATCGAGGACCC	CTGCCATCCTGTGCTGCCCTCCCTGGTGTGAGCGTATGTGCCTTTGGACTACATCGTGAA[CG]CAGCACCATGCAGTCCACGGGCATATACACTTGCCTCAAGGTCTATGTCATCGAGGACCC	GRCm10															FALSE	Col27a1	NM_025685.3	chr4	63215411	63334991	119581	+
0.68108	-0.81887	7.61254	1.57742e-06	0.00127493	5.47237	cg45059312	68710474	AAATCRCCATATCACATATTAAAAAATTTACCCTTATTCTAAAAAATAAC						cg	R	B	C	II	1	7	119604841	Mus musculus	mm10	aATCrCCATATCACATATTAAaaAATTTaCCCTTaTTCTAAAaAaTAACr	AGGGACTGAGGAGATCGCCATATCACATATTAAGGAATTTGCCCTTGTTCTAAAGAGTAA[CG]TCATTAAAGTACTTAATGCAGAACAAAAACTCAGTCAACTATGCACGTTTAAGTTATCTT	AGGGACTGAGGAGATCGCCATATCACATATTAAGGAATTTGCCCTTGTTCTAAAGAGTAA[CG]TCATTAAAGTACTTAATGCAGAACAAAAACTCAGTCAACTATGCACGTTTAAGTTATCTT	GRCm10															FALSE	.	.	.	.	.	.	.
0.553259	-1.75464	7.5967	1.61766e-06	0.00130377	5.44889	cg29748675	75737307	TATCTAATACACTTCTCCACCRCCCTTAAATTAATAATAAATAACTTCAC						cg	R	B	C	II	1	11	73324349	Mus musculus	mm10	ATCTaaTaCACTTCTCCACCrCCCTTaaATTaaTAATaAATaaCTTCACr	CACAGTCAATGTATCTGGTGCACTTCTCCACCGCCCTTGGATTGGTAATGAATGGCTTCA[CG]TCCAGCCCTGCTCTGTGAACTTCAGTGCCATTCCTTAGCCAGTGAGTAACTAGAAACACT	CACAGTCAATGTATCTGGTGCACTTCTCCACCGCCCTTGGATTGGTAATGAATGGCTTCA[CG]TCCAGCCCTGCTCTGTGAACTTCAGTGCCATTCCTTAGCCAGTGAGTAACTAGAAACACT	GRCm10															FALSE	Aspa	NM_023113.5	chr11	73304987	73324637	19651	-
0.624372	-1.5575	7.59489	1.62231e-06	0.00130385	5.44621	cg44452497	12699458	TAATATATCAACAAACCTTCATCAAATAACTACTAAAAATATATTTTACC						cg	F	T	C	II	1	7	37180575	Mus musculus	mm10	aaTaTaTCAaCAAaCCTTCATCAAaTaaCTaCTaAAaaTATATTTTaCCr	CTTGTGTCATGAAAAGAAACAGCTTTGCCTGGGAATGCCATTACTGTGTAATGAGGCGTG[CG]GCAAAATATACCTTCAGCAGCCACTTGATGAAGGCTTGCTGACACACCAGCCCAGACAGA	CTTGTGTCATGAAAAGAAACAGCTTTGCCTGGGAATGCCATTACTGTGTAATGAGGCGTG[CG]GCAAAATATACCTTCAGCAGCCACTTGATGAAGGCTTGCTGACACACCAGCCCAGACAGA	GRCm10															FALSE	.	.	.	.	.	.	.
0.435577	-0.942529	7.58712	1.64251e-06	0.00131344	5.43468	cg45751980	36662591	CAACAAAATCACTCCCTTCTACCAAACTTAAACACTAACTCATCTTATCC						cg	F	T	C	II	1	8	61397254	Mus musculus	mm10	AaCAAaaTCACTCCCTTCTaCCAAACTTaaACACTaaCTCATCTTaTCCr	CTGACAATACTTCAAGAAAGGGAACCTGTCTGCCTCTGAAAAGAAACTGGAGTGTACTTA[CG]GACAAGATGAGCCAGTGTCCAAGTTTGGCAGAAGGGAGTGACCTTGCTGTGAATCCAGAC	CTGACAATACTTCAAGAAAGGGAACCTGTCTGCCTCTGAAAAGAAACTGGAGTGTACTTA[CG]GACAAGATGAGCCAGTGTCCAAGTTTGGCAGAAGGGAGTGACCTTGCTGTGAATCCAGAC	GRCm10															FALSE	.	.	.	.	.	.	.
0.68868	1.29793	7.58677	1.64343e-06	0.00131344	5.43415	cg29774781	97670231	AAAACACACRCAAATAAAATCTCTCRAACACAACAATCCTTTAACAAAAC						cg	F	T	C	II	1	11	76149131	Mus musculus	mm10	aaaCACACrCAaATaAAaTCTCTCraACACAaCAATCCTTTaACAaaACr	GCCAGACTTCCAGCGCCAAGTCAAAAGTTCCTTACTTCATCCCAATTCCCTGTATCTGGA[CG]TCCTGTCAAAGGATTGCTGTGTCCGAGAGACTTCATCTGCGTGTGCCCCCTTCCTGTTTC	GCCAGACTTCCAGCGCCAAGTCAAAAGTTCCTTACTTCATCCCAATTCCCTGTATCTGGA[CG]TCCTGTCAAAGGATTGCTGTGTCCGAGAGACTTCATCTGCGTGTGCCCCCTTCCTGTTTC	GRCm10															FALSE	Vps53	NM_026664.3	chr11	76046225	76179630	133406	-
0.45349	-0.660724	7.58252	1.65459e-06	0.00131868	5.42784	cg38181616	5754962	ACCCAACAAACTCCAAAATTACTTTACCCATTCTTCAATACAAAAATAAC						cg	R	B	C	II	1	2	27672186	Mus musculus	mm10	CCCAaCAAACTCCAaaaTTACTTTACCCATTCTTCAATaCAAAAaTaACr	GGAGGAGAAGCACCCAGCAAACTCCAGGGTTACTTTACCCATTCTTCAATGCAAAAGTGA[CG]CCTCTTTATGGCGCTATCAATAACCGCTTGCCTCTCCTGCTGCCGCAGTGGCCACATACG	GGAGGAGAAGCACCCAGCAAACTCCAGGGTTACTTTACCCATTCTTCAATGCAAAAGTGA[CG]CCTCTTTATGGCGCTATCAATAACCGCTTGCCTCTCCTGCTGCCGCAGTGGCCACATACG	GRCm10															FALSE	.	.	.	.	.	.	.
0.63661	-0.968184	7.57541	1.67342e-06	0.00132799	5.41729	cg43395010	10609443	ATCACTCCCAAACTAAACCTACTTAACAAAAACCTCAAATTCTATCATAC						cg	R	B	C	II	1	6	49149001	Mus musculus	mm10	TCACTCCCAaACTAAACCTaCTTaaCAAaaaCCTCAaATTCTaTCATaCr	GCTTGGGAGCAATCACTCCCAGACTAAACCTGCTTGGCAAGGGCCTCAGATTCTGTCATG[CG]CTGCAAAGCTCTGTCTCCAGTAGTGAAGGGGCGGCCCGAGCAAAGGTTCTCTTTCTAAGC	GCTTGGGAGCAATCACTCCCAGACTAAACCTGCTTGGCAAGGGCCTCAGATTCTGTCATG[CG]CTGCAAAGCTCTGTCTCCAGTAGTGAAGGGGCGGCCCGAGCAAAGGTTCTCTTTCTAAGC	GRCm10															FALSE	Igf2bp3	NM_023670.3	chr6	49085217	49214954	129738	-
0.563702	0.191135	7.57461	1.67556e-06	0.00132799	5.4161	cg42951468	31743210	ACCAATAAAAAACCAACCTAAACACAATATTTATCRCTTACAAACTAAAC						cg	F	T	C	II	1	5	140367162	Mus musculus	mm10	CCAaTaAaAaACCAACCTaAaCACAaTATTTaTCrCTTaCAAACTaaACr	GCCTCCCAAGTGCTGGGATTAAAGCATGCACCACCACGCCCGGCTGTGCCTGACTCTTTA[CG]TCCAGTTTGCAAGCGACAAATACTGTGCTCAGGTTGGTCTCTCACTGGCCCATATACCCA	GCCTCCCAAGTGCTGGGATTAAAGCATGCACCACCACGCCCGGCTGTGCCTGACTCTTTA[CG]TCCAGTTTGCAAGCGACAAATACTGTGCTCAGGTTGGTCTCTCACTGGCCCATATACCCA	GRCm10															FALSE	Snx8	NM_172277.2	chr5	140340302	140389247	48946	-
-1.36433	-6.75682	-7.56936	1.68964e-06	0.00133227	5.40829	cg43967572	19752113	ACCTATACAATAAAATTTCCCAACCAATATTTCAAACCCTTTAAAAAACA	76665488	ACCTATACGATAAAATTTCCCGACCGATATTTCGAACCCTTTAAAAAACG	T	Red	R	cg	F	T	C	I	1	6	125096157	Mus musculus	mm10	aCCTaTaCraTaaaATTTCCCraCCraTaTTTCraaCCCTTTAAaAaaCr	TCCCGCTCCAGCTCCTCCTCGCCGCGGCCGAAGGGGGGAAAATGGCTCCGGCTCCGGCGT[CG]CCTCTTAAAGGGCCCGAAACACCGGCCGGGAAATCCCACCGCACAGGCCCCGCCCCCCAC	TCCCGCTCCAGCTCCTCCTCGCCGCGGCCGAAGGGGGGAAAATGGCTCCGGCTCCGGCGT[CG]CCTCTTAAAGGGCCCGAAACACCGGCCGGGAAATCCCACCGCACAGGCCCCGCCCCCCAC	GRCm10			chr6:125095941-125096818	chr6	125095941	125096818	877	88	633	20.1	72.2	0.77			FALSE	Chd4	NM_145979.2	chr6	125095962	125096162	201	+
1.06838	-0.734797	7.56791	1.69355e-06	0.00133227	5.40613	cg29882668	30781249	ATAAAACTTACTAACCTAACCTTTAAATATTACAATATCTACTCTAACTC						cg	R	B	C	II	1	11	86571671	Mus musculus	mm10	TAaaaCTTaCTaaCCTaaCCTTTaAATaTTaCAATaTCTaCTCTaACTCr	AAAGAACAACAGTAGGGCTTGCTGGCCTGGCCTTTGAATGTTGCAATGTCTGCTCTGACT[CG]GGATGGCTTCGCAGCATGCATACCAGCGATTCCTCTTCTGGCCACCATGTTTATCACTCG	AAAGAACAACAGTAGGGCTTGCTGGCCTGGCCTTTGAATGTTGCAATGTCTGCTCTGACT[CG]GGATGGCTTCGCAGCATGCATACCAGCGATTCCTCTTCTGGCCACCATGTTTATCACTCG	GRCm10															FALSE	.	.	.	.	.	.	.
0.7699	1.23261	7.5674	1.69492e-06	0.00133227	5.40538	cg41687209	8669415	ATCTACTAATAAAACTAAACCAATAACTAACAAACCATAATCTAATAAAC						cg	F	T	C	II	1	4	148500693	Mus musculus	mm10	TCTaCTaATAaAaCTaAaCCAaTaaCTaaCAaaCCATAATCTAATAaaCr	TGTTTCCTCGTCTGTACAGTCTCTGGGCTCAGACAGGAGCTGTGAACTTGTTTCCAGTTG[CG]CCTATTAGATTATGGCCTGCCAGCCACTGGCTCAGCTCTATCAGCAGACAGGCAGAGTGG	TGTTTCCTCGTCTGTACAGTCTCTGGGCTCAGACAGGAGCTGTGAACTTGTTTCCAGTTG[CG]CCTATTAGATTATGGCCTGCCAGCCACTGGCTCAGCTCTATCAGCAGACAGGCAGAGTGG	GRCm10															FALSE	Mtor	NM_020009.2	chr4	148448581	148557685	109105	+
-1.0427	-4.15025	-7.564	1.70415e-06	0.00133455	5.40031	cg31907478	92625492	TTCCAATATAATATACCRTACACATCRAAAACRACTAAAATTTACACTTC						cg	R	B	C	II	1	13	93304766	Mus musculus	mm10	TCCAATaTaaTaTaCCrTaCACATCraaAaCraCTaaaaTTTaCACTTCr	CAAAGGACAGATTCCAATGTGGTGTGCCGTGCACATCGGGAGCGGCTGGGGTTTGCACTT[CG]AGATTTCTTCTATATAATTTTTTTTTTTAAACGTAAGGGAGGCAGTAGCATTGCTGCCTG	CAAAGGACAGATTCCAATGTGGTGTGCCGTGCACATCGGGAGCGGCTGGGGTTTGCACTT[CG]AGATTTCTTCTATATAATTTTTTTTTTTAAACGTAAGGGAGGCAGTAGCATTGCTGCCTG	GRCm10													chr13:93303526-93304637		FALSE	Homer1	NM_011982.3	chr13	93304494	93356885	52392	+
0.594482	-0.800745	7.56233	1.7087e-06	0.00133455	5.39783	cg29780386	99751449	ACCAACCAACCCTTAACTTAAAAATAATACTTCRAAAAACAACAAACATC						cg	R	B	C	II	1	11	76613482	Mus musculus	mm10	CCAaCCAACCCTTaACTTaAaAaTaATaCTTCraAAaACAACAaaCATCr	GCCCTCAGGGAGCCAGCCAACCCTTGACTTGAGAGTGATGCTTCGGAAGACAACAGGCAT[CG]TGCTTTGCAGAGAGAAGGGGTTCTGTTGTCATTTGTCCACTGGGTCAATGAACTGACAGA	GCCCTCAGGGAGCCAGCCAACCCTTGACTTGAGAGTGATGCTTCGGAAGACAACAGGCAT[CG]TGCTTTGCAGAGAGAAGGGGTTCTGTTGTCATTTGTCCACTGGGTCAATGAACTGACAGA	GRCm10															FALSE	.	.	.	.	.	.	.
0.422078	0.15248	7.56118	1.71182e-06	0.00133455	5.39612	cg36405155	15624498	AATCATTATTTAAAAATATCTATCACACACAAACTAACCCAATACTAACC						cg	F	T	C	II	1	19	42093682	Mus musculus	mm10	aTCATTATTTAAAAATATCTaTCACACACAaaCTAaCCCAATaCTAACCr	CTCCTCACCTCACTACTGTTTGAGAAGCAGTCAGCCATGCGAACTCAGTTTCTCTGGTGT[CG]GTTAGCATTGGGCTAGCCTGTGTGTGACAGATATTTTTAAATAATGACCAAAGGTGGGAA	CTCCTCACCTCACTACTGTTTGAGAAGCAGTCAGCCATGCGAACTCAGTTTCTCTGGTGT[CG]GTTAGCATTGGGCTAGCCTGTGTGTGACAGATATTTTTAAATAATGACCAAAGGTGGGAA	GRCm10														chr19:42090216-42091038	FALSE	Pi4k2a	NM_145501.2	chr19	42090434	42122218	31785	+
1.17063	1.32113	7.55614	1.72564e-06	0.00133975	5.38862	cg28378287	46692407	AATACTACAATAAAATACCTAAAACTAAACTTTATACTTACTTACTTAAC						cg	F	T	C	II	1	10	40495063	Mus musculus	mm10	ATaCTaCAATaaAaTaCCTaAAaCTaaACTTTaTACTTACTTaCTTaaCr	GATGCCTACTATGTGAGGGCATCTCCTTAGGGACAATGAGGCCTTGCCTCAAAATCACCA[CG]CCAAGCAAGTAAGTACAAAGTCCAGCTTCAGGCACTCCATTGCAGCATCAGAAGGCATGC	GATGCCTACTATGTGAGGGCATCTCCTTAGGGACAATGAGGCCTTGCCTCAAAATCACCA[CG]CCAAGCAAGTAAGTACAAAGTCCAGCTTCAGGCACTCCATTGCAGCATCAGAAGGCATGC	GRCm10															FALSE	.	.	.	.	.	.	.
1.04107	-1.34274	7.55534	1.72786e-06	0.00133975	5.38742	cg47558929	8663550	CAATAACTATAAAAACCCAAAAATAACTAACATTCACAATCCAACAAACA	96699495	CGATAACTATAAAAACCCAAAAATAACTAACGTTCGCGATCCAACAAACG	A	Red	R	cg	F	T	C	I	1	X	37191260	Mus musculus	mm10	CraTaaCTaTaaaaaCCCAAAAaTaACTaaCrTTCrCraTCCAaCAAaCr	TCTCTGATGCAGCGGATCAGATAGGAGGAGTAGGACGACAGAAAGAATCCTGTCCGGGAA[CG]CTTGCTGGACCGCGAACGCCAGTCACTTTTGGGCCCCCACAGCCACCGTCGCTTCCTCCT	TCTCTGATGCAGCGGATCAGATAGGAGGAGTAGGACGACAGAAAGAATCCTGTCCGGGAA[CG]CTTGCTGGACCGCGAACGCCAGTCACTTTTGGGCCCCCACAGCCACCGTCGCTTCCTCCT	GRCm10			chrX:37190898-37191746	chrX	37190898	37191746	848	82	535	19.3	63.1	0.97			FALSE	Rnf113a1	NM_153503.2	chrX	37191221	37192467	1247	+
0.716904	0.432138	7.55156	1.7383e-06	0.00134343	5.3818	cg38923526	64772280	ACTTTTCCACTCCAACRCATTTACATTTACTTTAAACTCTAATTCTCTTC						cg	R	B	C	II	1	2	126555773	Mus musculus	mm10	CTTTTCCACTCCAaCrCATTTACATTTaCTTTaaACTCTaaTTCTCTTCr	GTCAGAACAATACTTTTCCACTCCAGCGCATTTACATTTGCTTTGGACTCTGGTTCTCTT[CG]CAGAGATGGCTCCAGGTCAGAGTGCATGATGTACAAAGGTATCTCTGTTATTGGAGAAAA	GTCAGAACAATACTTTTCCACTCCAGCGCATTTACATTTGCTTTGGACTCTGGTTCTCTT[CG]CAGAGATGGCTCCAGGTCAGAGTGCATGATGTACAAAGGTATCTCTGTTATTGGAGAAAA	GRCm10														chr2:126552922-126553506	FALSE	Slc27a2	NM_011978.2	chr2	126553023	126588243	35221	+
0.771834	0.821317	7.5499	1.74292e-06	0.00134343	5.37932	cg41486727	26782345	AATCACTCAAAATACTATTAACATAACATAAATTAAACACTCACAATACC						cg	R	B	C	II	1	4	131897910	Mus musculus	mm10	aTCACTCAAaaTACTaTTaACATAaCATaAaTTaaaCACTCACAaTACCr	CCAGAAGCCGGAGTCACTCAAGGTACTGTTGACATAGCATGAGTTGGGCACTCACAGTAC[CG]CACTGCTCAGCATGGACGGCCCACTGGTGTTCTCTTGTTGGCTTTTATAGCATGAGTTCA	CCAGAAGCCGGAGTCACTCAAGGTACTGTTGACATAGCATGAGTTGGGCACTCACAGTAC[CG]CACTGCTCAGCATGGACGGCCCACTGGTGTTCTCTTGTTGGCTTTTATAGCATGAGTTCA	GRCm10															FALSE	Srsf4	NM_020587.2	chr4	131873638	131901725	28088	+
-1.28762	-4.56406	-7.54772	1.74901e-06	0.00134343	5.37607	cg45270876	13788571	CCTACACRACCTAAATAAAAACCTAAATTTTTCTAAAAACRTACTTATTC						cg	R	B	C	II	1	7	141194725	Mus musculus	mm10	CTaCACrACCTaAaTAAAAaCCTaAaTTTTTCTaAaaACrTaCTTATTCr	GCAACCCCAGGCCTGCACGACCTGAGTAAAAGCCTGAGTTTTTCTGAGGACGTGCTTATT[CG]TTTCTTTGAAATTTCAAAAAGTGTTGAAAACATGTCATTTGCGTCTGACACAGATGTACC	GCAACCCCAGGCCTGCACGACCTGAGTAAAAGCCTGAGTTTTTCTGAGGACGTGCTTATT[CG]TTTCTTTGAAATTTCAAAAAGTGTTGAAAACATGTCATTTGCGTCTGACACAGATGTACC	GRCm10			chr7:141193623-141195161	chr7	141193623	141195161	1538	128	903	16.6	58.7	0.97			FALSE	Lrrc56	NM_153777.2	chr7	141193642	141194942	1301	+
0.664494	1.3198	7.54687	1.75139e-06	0.00134343	5.3748	cg45462044	68782935	TATCAATCTACRTTAAACAATAAATAACRCTCCACTAAAAAAAATCAAAC						cg	F	T	C	II	1	8	22481554	Mus musculus	mm10	aTCAATCTaCrTTaAaCAATAaATAACrCTCCACTAaAAAAaaTCAaaCr	GGGAAGGAAAGGAAAGGAAAGGAAAGGAAAGGAAAGAATGAGCATTTGGTCAGAAGAGGA[CG]CCTGACCTTTTCTAGTGGAGCGTTATCTATTGCTCAACGCAGATTGACAACGTGGGATCA	GGGAAGGAAAGGAAAGGAAAGGAAAGGAAAGGAAAGAATGAGCATTTGGTCAGAAGAGGA[CG]CCTGACCTTTTCTAGTGGAGCGTTATCTATTGCTCAACGCAGATTGACAACGTGGGATCA	GRCm10															FALSE	Slc20a2	NM_011394.3	chr8	22476699	22569616	92918	+
-1.58315	-0.787018	-7.54205	1.76493e-06	0.0013502	5.36761	cg29847792	35639567	AAACTCAAAAACTAAACTTCAATAATTATAAACCTAAACTATATTAAACA	48779972	AAACTCAAAAACTAAACTTCAATAATTATAAACCTAAACTATATTAAACG	A	Red	R	cg	F	T	C	I	1	11	83020262	Mus musculus	mm10	AAACTCAaAAACTAAACTTCAATAATTaTaAACCTaAaCTATATTaaaCr	AGAGGAAGTGGGGAGAAAGCAGAGACCAAAAGAAACTAAAAACACCAAGAACAATCCGAA[CG]CCCAATATAGCTCAGGTTCACAATTATTGAAGTTTAGTTTCTGAGTTTCAAGCTTTCCAG	AGAGGAAGTGGGGAGAAAGCAGAGACCAAAAGAAACTAAAAACACCAAGAACAATCCGAA[CG]CCCAATATAGCTCAGGTTCACAATTATTGAAGTTTAGTTTCTGAGTTTCAAGCTTTCCAG	GRCm10															FALSE	Slfn8	NM_001167743.1	chr11	83002157	83020722	18566	-
0.678377	0.22895	7.53694	1.77938e-06	0.00135762	5.36	cg33997299	17750223	ATAATTAACTACCTATAATTTCAAATTATCTATCCAAACTTCAACATACC						cg	F	T	C	II	1	16	21826072	Mus musculus	mm10	TAaTTaaCTaCCTaTAaTTTCAaaTTaTCTaTCCAaACTTCAaCATaCCr	TTATTCTTGCAATTGTTATATATTAAAATGCCACAAAAGTTAAAAAACAGAAACTACTTA[CG]GCATGCTGAAGTCTGGACAGACAACCTGAAACTACAGGCAGCCAACTATTCCCTCGGATT	TTATTCTTGCAATTGTTATATATTAAAATGCCACAAAAGTTAAAAAACAGAAACTACTTA[CG]GCATGCTGAAGTCTGGACAGACAACCTGAAACTACAGGCAGCCAACTATTCCCTCGGATT	GRCm10															FALSE	.	.	.	.	.	.	.
0.551235	0.282271	7.53349	1.78923e-06	0.00135984	5.35484	cg32370608	95629242	ACTCRTTTCCAAATCAACATATTCTAAAACCRATAATATACAAAACCAAC						cg	F	T	C	II	1	14	34759417	Mus musculus	mm10	CTCrTTTCCAAaTCAaCATATTCTaAaACCrATaaTaTaCAaaACCAaCr	AGCCCTCCCTCAGCAAGTGAGATCATTGTAATTCCATTATCATCTGAGTGTTGCACCCTA[CG]CTGGTCCTGCACACCATCGGTCTCAGAATATGCTGACTTGGAAACGAGCCTTATGTGATC	AGCCCTCCCTCAGCAAGTGAGATCATTGTAATTCCATTATCATCTGAGTGTTGCACCCTA[CG]CTGGTCCTGCACACCATCGGTCTCAGAATATGCTGACTTGGAAACGAGCCTTATGTGATC	GRCm10															FALSE	.	.	.	.	.	.	.
0.579134	0.324393	7.53195	1.79363e-06	0.00135984	5.35255	cg40338625	92630380	ACATTAACCRACTAAACTAACTAAACACAATCCACTTAAAAATCACAAAC						cg	F	T	C	II	1	3	131263967	Mus musculus	mm10	CATTaACCraCTAaACTAaCTAAACACAaTCCACTTaaAAATCACAaaCr	GGACAAGCACTGAGTGCTGCCTAAAGAGAAACTCCTGGTCTTTGTGCCCTTTGACCGCCA[CG]CCTGTGATTTCCAAGTGGACTGTGTTTAGCTAGTCTAGCCGGTCAATGTGTCAAAGGAGC	GGACAAGCACTGAGTGCTGCCTAAAGAGAAACTCCTGGTCTTTGTGCCCTTTGACCGCCA[CG]CCTGTGATTTCCAAGTGGACTGTGTTTAGCTAGTCTAGCCGGTCAATGTGTCAAAGGAGC	GRCm10															FALSE	Hadh	NM_008212.4	chr3	131233418	131272101	38684	-
0.447633	-1.27229	7.52811	1.80468e-06	0.00135984	5.34682	cg32233601	81783526	CTACTACTATATTAACTTTATTCCAAATCTTACTAAACTCTATTTCACAC						cg	F	T	C	II	1	14	19712543	Mus musculus	mm10	TaCTaCTaTaTTAACTTTaTTCCAAaTCTTACTAAaCTCTaTTTCACACr	AGAGAGAACCACAGCACTGGGAAACAGATCTAAATAAAGCAGACGCAGACTACCGGACAA[CG]TGTGAAACAGAGCTTAGTAAGACTTGGAACAAAGTTAACACAGCAGCAGAGAGAGGGCTT	AGAGAGAACCACAGCACTGGGAAACAGATCTAAATAAAGCAGACGCAGACTACCGGACAA[CG]TGTGAAACAGAGCTTAGTAAGACTTGGAACAAAGTTAACACAGCAGCAGAGAGAGGGCTT	GRCm10															FALSE	.	.	.	.	.	.	.
-0.940803	-4.06274	-7.52808	1.80478e-06	0.00135984	5.34677	cg35060524	59706541	TACTATAATCTAAACATACACATTTCTTTCTATAAACTCCAAAAAACACA	5807908	TACTATAATCTAAACGTACGCATTTCTTTCTATAAACTCCAAAAAACACG	T	Red	R	cg	R	B	C	I	1	17	56764801	Mus musculus	mm10	TaCTaTAaTCTaAaCrTaCrCATTTCTTTCTaTAaaCTCCAaAaaACACr	CCTTAGCAGCATTGCTGTAGTCTGAGCGTGCGCATTTCTTTCTGTAGGCTCCAGAGGACA[CG]AGCGACCCGGAAGACTTTCCTGCCACACTCCAGAGCTGGTGTGAGGGGCATCGATGGCGG	CCTTAGCAGCATTGCTGTAGTCTGAGCGTGCGCATTTCTTTCTGTAGGCTCCAGAGGACA[CG]AGCGACCCGGAAGACTTTCCTGCCACACTCCAGAGCTGGTGTGAGGGGCATCGATGGCGG	GRCm10			chr17:56764639-56765058	chr17	56764639	56765058	419	41	261	19.6	62.3	1.03		chr17:56762028-56762269	FALSE	Dus3l	NM_144858.2	chr17	56764750	56770093	5344	+
0.532807	0.580496	7.52764	1.80605e-06	0.00135984	5.34611	cg39994608	74774820	TATAAAACTATTTCCCACAACAATAAAATTATAACCAATAATCTCCTTCC						cg	R	B	C	II	1	3	88496298	Mus musculus	mm10	ATAaAACTATTTCCCACAaCAaTaaaATTATAACCAaTAaTCTCCTTCCr	TTATTATTTTTTATAGAACTATTTCCCACAGCAGTGGGATTATAACCAGTAGTCTCCTTC[CG]GCTTCTCGGAAAGCGCCTGCTGGAGTTGGTTAATTATTATGACACCACTGTCTTGGCGTA	TTATTATTTTTTATAGAACTATTTCCCACAGCAGTGGGATTATAACCAGTAGTCTCCTTC[CG]GCTTCTCGGAAAGCGCCTGCTGGAGTTGGTTAATTATTATGACACCACTGTCTTGGCGTA	GRCm10															FALSE	Lmna	NM_001002011.3	chr3	88481147	88503352	22206	-
0.605532	-0.197689	7.52579	1.8114e-06	0.00136029	5.34335	cg29717478	10660966	CTATCCTCCTATAAACTCACTTTAAAACTATTATAATTAACTATACAAAC						cg	F	T	C	II	1	11	70218475	Mus musculus	mm10	TaTCCTCCTaTaAACTCACTTTAaaACTaTTATaATTaaCTATaCAaaCr	AAGGAACTAGTTCCACAATGGTATGTGTTAATGGTGCCCTCTAGTATGTAAACAGTGTAC[CG]CCTGCATAGCCAATCATAACAGTCCTAAAGTGAGTTCACAGGAGGACAGAACTTGGGTCT	AAGGAACTAGTTCCACAATGGTATGTGTTAATGGTGCCCTCTAGTATGTAAACAGTGTAC[CG]CCTGCATAGCCAATCATAACAGTCCTAAAGTGAGTTCACAGGAGGACAGAACTTGGGTCT	GRCm10		chr11:70220439-70220681												chr11:70213813-70214761	FALSE	Slc16a13	NM_172371.3	chr11	70216791	70220994	4204	-
0.612718	-1.43101	7.52036	1.82722e-06	0.00136514	5.33523	cg37868678	81601567	ATTTAAAAATCAACATCAAAACATTCCCTACTACTACCRACTATAAAACC						cg	F	T	C	II	1	1	181998002	Mus musculus	mm10	TTTAAAaaTCAACATCAAAACATTCCCTaCTaCTaCCraCTaTaAAaCCr	ATGCTTTCTAAAAGTGTTGTGCCAGTTTTTATGCCAGCCAGCAAATACACAGAGTGTCCA[CG]GCTTCACAGCCGGCAGCAGCAGGGAATGTTTTGATGTTGACCTTTAAATTGAAGAATAAT	ATGCTTTCTAAAAGTGTTGTGCCAGTTTTTATGCCAGCCAGCAAATACACAGAGTGTCCA[CG]GCTTCACAGCCGGCAGCAGCAGGGAATGTTTTGATGTTGACCTTTAAATTGAAGAATAAT	GRCm10															FALSE	Enah	NM_010135.3	chr1	181896383	182019980	123598	-
0.676253	0.0658282	7.5203	1.8274e-06	0.00136514	5.33514	cg40874222	78757384	ACAAAAAAAACCACACCTAAAAATTCTACCCATCCATTTACAAAAAAACC						cg	R	B	C	II	1	4	49548222	Mus musculus	mm10	CAaaAAaAACCACACCTAAAaATTCTACCCATCCATTTaCAaAAAaACCr	CTTCAAGGAATGCAGGAAGAACCACACCTAAAGATTCTACCCATCCATTTGCAGAAAGAC[CG]CACACCTAGGTCAGAAGCCACTAGAATGTGACTCGCAGTCACAGAACATAACTTGGGGCT	CTTCAAGGAATGCAGGAAGAACCACACCTAAAGATTCTACCCATCCATTTGCAGAAAGAC[CG]CACACCTAGGTCAGAAGCCACTAGAATGTGACTCGCAGTCACAGAACATAACTTGGGGCT	GRCm10															FALSE	Aldob	NM_144903.3	chr4	49535992	49549546	13555	-
0.624426	-0.693958	7.51385	1.84636e-06	0.00137186	5.3255	cg42206527	19709972	TAACAAATCCAACATACCCAATATACAATAAAAAATCTACATATTATACC						cg	F	T	C	II	1	5	63876176	Mus musculus	mm10	AACAAaTCCAaCATaCCCAaTaTaCAATaAAAAaTCTACATaTTATaCCr	AACAATTAACCAACATCTCAGAGTTCCCATTTATAAAATGAGATTGTAATGAGATTTAAG[CG]GCATAACATGTAGACTTTTCATTGCACACTGGGCATGCTGGACTTGTTAATGCTATCTAT	AACAATTAACCAACATCTCAGAGTTCCCATTTATAAAATGAGATTGTAATGAGATTTAAG[CG]GCATAACATGTAGACTTTTCATTGCACACTGGGCATGCTGGACTTGTTAATGCTATCTAT	GRCm10															FALSE	0610040J01Rik	NM_029554.4	chr5	63812494	63899619	87126	+
0.501473	-1.06316	7.51241	1.85062e-06	0.00137186	5.32335	cg37710901	64666875	TTAAAAAACAACTACCRCAACTCATCTTCCATTTTATAAATACTAAACTC						cg	F	T	C	II	1	1	164455947	Mus musculus	mm10	TAaaAAaCAaCTaCCrCAACTCATCTTCCATTTTaTaaaTaCTaAaCTCr	GTCATTTCTTACATTGTGAAAGGGGCACAGATAGGATTGCACAAAACACAAACTGGGTTT[CG]AGCTCAGCACCCACAAAATGGAAGATGAGTTGCGGCAGCTGCTTCCTAAGTCCGTGGGTA	GTCATTTCTTACATTGTGAAAGGGGCACAGATAGGATTGCACAAAACACAAACTGGGTTT[CG]AGCTCAGCACCCACAAAATGGAAGATGAGTTGCGGCAGCTGCTTCCTAAGTCCGTGGGTA	GRCm10		chr1:164457666-164458737													FALSE	Atp1b1	NM_009721.6	chr1	164437098	164458355	21258	-
0.621099	-2.13937	7.51235	1.85078e-06	0.00137186	5.32326	cg41604907	19802190	AAACAAATCTAAACTTATAAAATTTATAAACCRCAATTACCAAAAACAAC						cg	R	B	C	II	1	4	139967548	Mus musculus	mm10	aaCAaaTCTaaACTTaTAaAaTTTaTAAaCCrCAaTTACCAaaAaCAaCr	CTGCCCGACTGGGGCAGGTCTGGACTTGTAGAGTTTGTAAGCCGCAGTTACCAGGAGCAG[CG]CAGCTGCGGACAGCACCACCTTGCTGGGCAGCTGCATGTCCAAATGCCAGTCCTGGCCCT	CTGCCCGACTGGGGCAGGTCTGGACTTGTAGAGTTTGTAAGCCGCAGTTACCAGGAGCAG[CG]CAGCTGCGGACAGCACCACCTTGCTGGGCAGCTGCATGTCCAAATGCCAGTCCTGGCCCT	GRCm10													chr4:139965565-139965837		FALSE	Klhdc7a	NM_173427.2	chr4	139962172	139968026	5855	-
0.681227	-1.38302	7.50958	1.85901e-06	0.0013744	5.31912	cg46981687	6687285	CRCATAACTTCACAAAATACCAAACATCTTAACCTCTAAATATACCTTAC						cg	R	B	C	II	1	9	77046506	Mus musculus	mm10	rCATAaCTTCACAaAATACCAaACATCTTaACCTCTaAaTaTaCCTTACr	TCCACTGTAAACGCATAGCTTCACAGAATACCAGACATCTTGACCTCTGAGTGTGCCTTA[CG]GCTCCCTCCCCCGACAGCGGCATAGCAGGAAGACTTGACTTTTCTTGGCTACAAATGCTT	TCCACTGTAAACGCATAGCTTCACAGAATACCAGACATCTTGACCTCTGAGTGTGCCTTA[CG]GCTCCCTCCCCCGACAGCGGCATAGCAGGAAGACTTGACTTTTCTTGGCTACAAATGCTT	GRCm10															FALSE	Tinag	NM_012033.3	chr9	77045981	77047281	1301	-
0.536891	0.40966	7.50283	1.87923e-06	0.00138262	5.30902	cg33582350	92686465	TTAACCTCTTTATTAACCTCTAAAATCTAAAACTAAATACAACACAATCC						cg	F	T	C	II	1	15	81814331	Mus musculus	mm10	TAaCCTCTTTaTTaaCCTCTaAAATCTaaAACTaAATaCAACACAaTCCr	CTATTACCAAGTGCATGTACACAGTACACATTCGTTATTGCTATGAGCTCACTGAGGGCA[CG]GACTGTGTTGCATTCAGTTCCAGATTTCAGAGGCCAACAAAGAGGCTAAGCAATGGCTGT	CTATTACCAAGTGCATGTACACAGTACACATTCGTTATTGCTATGAGCTCACTGAGGGCA[CG]GACTGTGTTGCATTCAGTTCCAGATTTCAGAGGCCAACAAAGAGGCTAAGCAATGGCTGT	GRCm10														chr15:81810601-81811771	FALSE	Tef	NM_153484.3	chr15	81802672	81826863	24192	+
0.582631	-1.5876	7.50265	1.8798e-06	0.00138262	5.30874	cg43886219	94758261	AAAACACTTCTCTTACCTAAAACTTCATCTTCCAACAAAAATACATAAAC						cg	F	T	C	II	1	6	116386270	Mus musculus	mm10	aaACACTTCTCTTACCTaAAaCTTCATCTTCCAACAaaAATaCATaaaCr	CATCCCCCACCCCCACGGGCGCAGGGCACTATGCTGCTGGAGAGAGCTGTACTGAGGACA[CG]CCCATGCATTCCTGTTGGAAGATGAAGCTTCAGGTAAGAGAAGTGTCCTGTCAGCACTGG	CATCCCCCACCCCCACGGGCGCAGGGCACTATGCTGCTGGAGAGAGCTGTACTGAGGACA[CG]CCCATGCATTCCTGTTGGAAGATGAAGCTTCAGGTAAGAGAAGTGTCCTGTCAGCACTGG	GRCm10															FALSE	March8	NM_001302384.1	chr6	116338021	116409540	71520	+
0.814924	0.853475	7.49314	1.90868e-06	0.00139884	5.29449	cg40100693	48669835	ACCTCTCTTTTCATATACCAAAATCCATTACTAATCAAAAAAATTTAACC						cg	F	T	C	II	1	3	100670656	Mus musculus	mm10	CCTCTCTTTTCATATaCCAaAaTCCATTACTAATCAAAAAAaTTTAaCCr	TGTCATTAACTTGTGTATTTTGATGTTTGGCCTGGACTGTCTGGAAGTAAGTGGCAGATA[CG]GCTAAACTTTTTTGATTAGTAATGGACTCTGGCATATGAAAAGAGAGGCCAGACACAGTC	TGTCATTAACTTGTGTATTTTGATGTTTGGCCTGGACTGTCTGGAAGTAAGTGGCAGATA[CG]GCTAAACTTTTTTGATTAGTAATGGACTCTGGCATATGAAAAGAGAGGCCAGACACAGTC	GRCm10															FALSE	Man1a2	NM_010763.2	chr3	100562202	100685473	123272	-
0.729173	1.22496	7.49218	1.91162e-06	0.00139884	5.29305	cg30905700	6611456	AATCTAAAAATCACAATAAATACTACCATTCCAAACRATACTAATTATAC						cg	R	B	C	II	1	12	85127325	Mus musculus	mm10	ATCTAAAaATCACAATaAATACTACCATTCCAAACraTACTAATTATACr	CAGTGACAGATAATCTAAAGATCACAATGAATACTACCATTCCAAACGGTACTAATTATA[CG]CAGGAGCTAAGTCCAATATTCTTCCCGGCTTATGCAAAGTCAGCAGACTCACTCTTTCCT	CAGTGACAGATAATCTAAAGATCACAATGAATACTACCATTCCAAACGGTACTAATTATA[CG]CAGGAGCTAAGTCCAATATTCTTCCCGGCTTATGCAAAGTCAGCAGACTCACTCTTTCCT	GRCm10															FALSE	Dlst	NM_030225.4	chr12	85110832	85134091	23260	+
0.461791	-0.365833	7.48867	1.9224e-06	0.00140313	5.2878	cg46265184	15640527	AAAATAAAAAACATAAACCAATATACCTAACTTTTAAAAAACCATCTACC						cg	F	T	C	II	1	8	119924021	Mus musculus	mm10	aaaTAAAaaACATaAaCCAaTATACCTaaCTTTTAAAAAaCCATCTACCr	TTTATTCATGAATAGATGGACCAACGGAGAGAATCTCTGAGCCCTCTTGATCATTAGCAA[CG]GTAGATGGCTTTTTAAAAGCCAGGTATACTGGCTCATGTCCTTTACCCCAGCCTTTACCT	TTTATTCATGAATAGATGGACCAACGGAGAGAATCTCTGAGCCCTCTTGATCATTAGCAA[CG]GTAGATGGCTTTTTAAAAGCCAGGTATACTGGCTCATGTCCTTTACCCCAGCCTTTACCT	GRCm10															FALSE	Usp10	NM_001310630.1	chr8	119910359	119957560	47202	+
0.604805	-0.0741634	7.48234	1.94205e-06	0.00141387	5.2783	cg40906796	58796337	CAACCTATCTCTATCCTAAACTATTTCTTTATAACAAACTTCATAAATAC						cg	R	B	C	II	1	4	54967932	Mus musculus	mm10	AaCCTaTCTCTaTCCTaAaCTaTTTCTTTaTAaCAAACTTCATaaaTACr	CTTCCAAGGATCAGCCTGTCTCTGTCCTGAGCTGTTTCTTTGTAGCAAACTTCATGGGTA[CG]GGATCACCCCTGGTGACCTTTCCTGCGTCATTCTAGGGAGGTCTTGGCATGCCCCAGCTG	CTTCCAAGGATCAGCCTGTCTCTGTCCTGAGCTGTTTCTTTGTAGCAAACTTCATGGGTA[CG]GGATCACCCCTGGTGACCTTTCCTGCGTCATTCTAGGGAGGTCTTGGCATGCCCCAGCTG	GRCm10															FALSE	Zfp462	NM_172867.3	chr4	54947944	55083563	135620	+
0.530275	-1.05092	7.47925	1.95169e-06	0.00141394	5.27367	cg38662726	75638542	TCTTTAACCCCRACATTAACCTAAAAATTTTTCAAAACTCTACTTAACTC						cg	R	B	C	II	1	2	90522753	Mus musculus	mm10	CTTTaaCCCCraCATTaACCTaaaaATTTTTCAaaACTCTaCTTaaCTCr	TGACTCTCTTATCTTTGGCCCCGGCATTGACCTGGGGATTTTTCAGGACTCTGCTTGGCT[CG]GCCCTGCTAATGCTGGGTCTAACCAGCAGTGTTGAAGATGTGCCAGGGTACTCTGATCCC	TGACTCTCTTATCTTTGGCCCCGGCATTGACCTGGGGATTTTTCAGGACTCTGCTTGGCT[CG]GCCCTGCTAATGCTGGGTCTAACCAGCAGTGTTGAAGATGTGCCAGGGTACTCTGATCCC	GRCm10															FALSE	Ptprj	NM_008982.5	chr2	90432888	90580647	147760	-
0.487792	-0.206499	7.47818	1.95507e-06	0.00141394	5.27206	cg33243899	24735434	TCATTTACCCATAAAAACCACTAATAAAAAAACTCTCCACAAACAAAATC						cg	R	B	C	II	1	15	36900184	Mus musculus	mm10	CATTTaCCCATAAaAaCCACTaaTAaaAAAaCTCTCCACAaACAaAaTCr	CTTCCTCAGAATCATTTGCCCATAAGAGCCACTGGTAGGAAAGCTCTCCACAGACAGAGT[CG]CCTGGAGCCAGGGCTGCAGAGGGCCAGGCCAAGGAGGTGGAGGAGGTGGTGCAGGGGTGG	CTTCCTCAGAATCATTTGCCCATAAGAGCCACTGGTAGGAAAGCTCTCCACAGACAGAGT[CG]CCTGGAGCCAGGGCTGCAGAGGGCCAGGCCAAGGAGGTGGAGGAGGTGGTGCAGGGGTGG	GRCm10															FALSE	.	.	.	.	.	.	.
0.537938	-0.264904	7.47757	1.95698e-06	0.00141394	5.27114	cg31489467	82810181	CAAAACCCTCTAAACATAAACATTTCAACACAAACTAAACTTTACATCTC						cg	R	B	C	II	1	13	41828444	Mus musculus	mm10	AAAaCCCTCTaaaCATaAaCATTTCAACACAaaCTaaACTTTaCATCTCr	AGCTGTAGAAACAAAGCCCTCTGGGCATGAGCATTTCAACACAGGCTGGACTTTGCATCT[CG]CTCTTAGGCACCTTTCCTTATAAGTGTGGGAGGGAATCTCTGCGATAGGTAACCTGACAG	AGCTGTAGAAACAAAGCCCTCTGGGCATGAGCATTTCAACACAGGCTGGACTTTGCATCT[CG]CTCTTAGGCACCTTTCCTTATAAGTGTGGGAGGGAATCTCTGCGATAGGTAACCTGACAG	GRCm10															FALSE	Adtrp	NM_175417.4	chr13	41763147	41847488	84342	-
0.631886	0.345736	7.47162	1.97575e-06	0.00142165	5.26222	cg33967079	7779951	ACCTCTATTATACTAAAAACACTATACAAACATAAAACTCCTACTATTAC						cg	F	T	C	II	1	16	18383260	Mus musculus	mm10	CCTCTaTTaTaCTaAAaaCACTaTaCAaACATaAAaCTCCTaCTaTTaCr	GTGTGGTCATTCTTTAAAAGTGACACACTGAACAACACATGCAGCAAGCATTTCAGGTGA[CG]CAACAGCAGGAGCTTCATGTCTGCACAGTGCCTTCAGCACAACAGAGGCAGGGCAGAGTG	GTGTGGTCATTCTTTAAAAGTGACACACTGAACAACACATGCAGCAAGCATTTCAGGTGA[CG]CAACAGCAGGAGCTTCATGTCTGCACAGTGCCTTCAGCACAACAGAGGCAGGGCAGAGTG	GRCm10															FALSE	Arvcf	NM_001272029.1	chr16	18348181	18407076	58896	+
0.929972	2.46418	7.46944	1.98271e-06	0.00142165	5.25893	cg35635475	95778503	ATAAAACTAAACTCAAAAAATTCCCTACTTTTACTTTATATTACTAAAAC						cg	F	T	C	II	1	18	39438434	Mus musculus	mm10	TAaAACTAAaCTCAAaaAaTTCCCTACTTTTACTTTaTaTTACTaAaACr	TGCCACTACACGGTGACAAAATCACGATCTTGAAATTGAGAAGCAATGCTTTTTACTTTA[CG]TCTCAGTAACACAAAGTAAAAGTAGGGAACTCCTTGAGCTTAGTTCTATCATTTTAAAGG	TGCCACTACACGGTGACAAAATCACGATCTTGAAATTGAGAAGCAATGCTTTTTACTTTA[CG]TCTCAGTAACACAAAGTAAAAGTAGGGAACTCCTTGAGCTTAGTTCTATCATTTTAAAGG	GRCm10															FALSE	Nr3c1	NM_008173.3	chr18	39410544	39487245	76702	-
0.656208	0.614016	7.46745	1.98905e-06	0.00142165	5.25595	cg36842000	26641192	TCTTAATCAAAATAATTTCTACAACTTATCTTAAATACCAACACCCAACC						cg	F	T	C	II	1	1	39574163	Mus musculus	mm10	CTTaaTCAAaATAATTTCTACAACTTATCTTaaaTACCAACACCCAaCCr	GGCCGGAAAAGTTTATACTGAACTGAACTATAGGCACAGGTGCTTAGAAAGCCTATCGAG[CG]GCTGGGTGTTGGTACCCAAGATAAGTTGTAGAAATTATCTTGACCAAGATAGGGGAAAGC	GGCCGGAAAAGTTTATACTGAACTGAACTATAGGCACAGGTGCTTAGAAAGCCTATCGAG[CG]GCTGGGTGTTGGTACCCAAGATAAGTTGTAGAAATTATCTTGACCAAGATAGGGGAAAGC	GRCm10	chr1:39576525-39577527														FALSE	Rnf149	NM_001033135.3	chr1	39551295	39577347	26053	-
0.938482	-0.415058	7.46225	2.00574e-06	0.00142165	5.24814	cg31361935	97688479	ACAATCCTAAACAACATTCATTTTAAATACTTAATTAACAACAATTCCCA	51731861	ACAATCCTAAACGACATTCGTTTTAAATACTTAATTAACGACAATTCCCG	A	Red	R	cg	F	T	C	I	1	13	25091503	Mus musculus	mm10	ACAaTCCTAAaCraCATTCrTTTTAAATaCTTaaTTAaCraCAaTTCCCr	AATATGACCCCTATAAAGTTAAAAAATAACCAATTAACCCAAGAGAACTCTCAGAAGTTA[CG]GGAACTGCCGCTAACCAAGCATTTAAAACGAATGCCGCTTAGGACTGTGCCTTTTCTGTG	AATATGACCCCTATAAAGTTAAAAAATAACCAATTAACCCAAGAGAACTCTCAGAAGTTA[CG]GGAACTGCCGCTAACCAAGCATTTAAAACGAATGCCGCTTAGGACTGTGCCTTTTCTGTG	GRCm10															FALSE	Dcdc2a	NM_001195617.1	chr13	25056003	25121523	65521	+
0.879159	0.987444	7.46083	2.01034e-06	0.00142165	5.246	cg31336638	61735920	AACCCCTCTTCAAATCCTACTAAATTCTATAATATATATAAAACTTATAC						cg	F	T	C	II	1	13	22030219	Mus musculus	mm10	aCCCCTCTTCAaaTCCTaCTAAATTCTATaaTATATATAAaACTTATaCr	AAACAGTACAAATATTTTCTTTGGTGCAAACTCAGGTAAACATGGGGAAATGCTGGATTT[CG]CATAAGTCTTATATATACCATAGAATTTAGCAGGACCTGAAGAGGGGCCTTGTGGCTTAG	AAACAGTACAAATATTTTCTTTGGTGCAAACTCAGGTAAACATGGGGAAATGCTGGATTT[CG]CATAAGTCTTATATATACCATAGAATTTAGCAGGACCTGAAGAGGGGCCTTGTGGCTTAG	GRCm10															FALSE	.	.	.	.	.	.	.
-0.556224	-0.28977	-7.45942	2.0149e-06	0.00142165	5.24388	cg29896950	63714880	AACTACCTAAAAAAACTTTCCAAACRAAAATATAATCATACTCCTTTCTC						cg	F	T	C	II	1	11	87896274	Mus musculus	mm10	aCTaCCTaaaAaAACTTTCCAAACraaaATaTaATCATaCTCCTTTCTCr	CACTTTTAGAATACATTGTGGGCATCAGATGGTCATTCTTCCTTTTTTTTTTTTTTATGA[CG]AGAAAGGAGCATGATCACATCCCCGTTTGGAAAGTTCTCCCAGGCAGCTGGGTGGAAGGA	CACTTTTAGAATACATTGTGGGCATCAGATGGTCATTCTTCCTTTTTTTTTTTTTTATGA[CG]AGAAAGGAGCATGATCACATCCCCGTTTGGAAAGTTCTCCCAGGCAGCTGGGTGGAAGGA	GRCm10															FALSE	.	.	.	.	.	.	.
0.689118	-1.14122	7.45775	2.02031e-06	0.00142165	5.24137	cg28613141	50675205	AACCTTCTAAACTAAAACCCCRAAAACATTTTCCTATAATTCAAAAATCC						cg	R	B	C	II	1	10	69928639	Mus musculus	mm10	ACCTTCTAAaCTAaAaCCCCrAaaACATTTTCCTATaaTTCAaaAATCCr	GCTAATAATTAAACCTTCTAAGCTAGAGCCCCGAGGACATTTTCCTATGGTTCAGGAATC[CG]CTGTAAAAAGTTTCATTGTCCAATAGTAAATGGCTCTTCCCACAAAGTAAACCCTGGGGA	GCTAATAATTAAACCTTCTAAGCTAGAGCCCCGAGGACATTTTCCTATGGTTCAGGAATC[CG]CTGTAAAAAGTTTCATTGTCCAATAGTAAATGGCTCTTCCCACAAAGTAAACCCTGGGGA	GRCm10															FALSE	Ank3	NM_170730.2	chr10	69533707	70027436	493730	+
0.647589	1.16277	7.45645	2.02455e-06	0.00142165	5.23941	cg29898437	57805431	TATTATACACAATTCTAATAAAAATTATCCCRAAACCAAACAATAATAAC						cg	F	T	C	II	1	11	88046695	Mus musculus	mm10	aTTATACACAaTTCTAaTAAAaaTTATCCCraAaCCAaaCAaTaaTaaCr	TGGCCTCGAACTCTGAAATCCGCCTGCCTCTGCCTCCCGAGCGCTGGGATTAAAGGCATG[CG]CCACCACTGCCTGGCTCCGGGATAACCTTTACTAGAACTGTGTATAACAGGGTAGGCTGG	TGGCCTCGAACTCTGAAATCCGCCTGCCTCTGCCTCCCGAGCGCTGGGATTAAAGGCATG[CG]CCACCACTGCCTGGCTCCGGGATAACCTTTACTAGAACTGTGTATAACAGGGTAGGCTGG	GRCm10		chr11:88047189-88048653													TRUE	Srsf1	NM_173374.4	chr11	88045872	88047172	1301	+
0.578152	-0.0195062	7.45547	2.02775e-06	0.00142165	5.23794	cg42561380	67627953	AACTATTCTAACTAAAATAAACTAAAACTCAAACCCTATTCCATATTCCC						cg	F	T	C	II	1	5	108675797	Mus musculus	mm10	ACTaTTCTaaCTaaAaTAAaCTaAAaCTCAaaCCCTaTTCCATaTTCCCr	GTGTGTGTTCACTCACAAGTATGTACACATACAACAGTAGCCTTGCGCATGCACTGCCCT[CG]GGAACATGGAACAGGGCCTGAGCTTCAGCTTACTCCAGCCAGAACAGTCTCCATGATGGT	GTGTGTGTTCACTCACAAGTATGTACACATACAACAGTAGCCTTGCGCATGCACTGCCCT[CG]GGAACATGGAACAGGGCCTGAGCTTCAGCTTACTCCAGCCAGAACAGTCTCCATGATGGT	GRCm10		chr5:108677592-108677836													FALSE	Idua	NM_172997.1	chr5	108660330	108685446	25117	+
0.712644	-0.359179	7.45493	2.02949e-06	0.00142165	5.23713	cg34541944	12669377	CATAATTATAAAACAATAATTAACCCATTAAATCATCCTTTTCAAAAACC						cg	F	T	C	II	1	16	95699985	Mus musculus	mm10	ATAATTATaAAACAATaATTAACCCATTAAaTCATCCTTTTCAaAAACCr	AGAGCCTTTGAGCCAGATCACAAGGTAAACACAGCCAGCTCTTCAGCAGGCTGGGATGCA[CG]GTTTCTGAAAAGGATGACTTAATGGGTTAATCATTGTTTCATAATTATGCCCAGGTCCTA	AGAGCCTTTGAGCCAGATCACAAGGTAAACACAGCCAGCTCTTCAGCAGGCTGGGATGCA[CG]GTTTCTGAAAAGGATGACTTAATGGGTTAATCATTGTTTCATAATTATGCCCAGGTCCTA	GRCm10		chr16:95701863-95702893													FALSE	.	.	.	.	.	.	.
0.563017	0.141367	7.45455	2.03077e-06	0.00142165	5.23655	cg28610781	13617526	TTCCTATTACTAAAAAACAAACTACTATACCRACAAATTTAAACAAACAC						cg	R	B	C	II	1	10	69720379	Mus musculus	mm10	TCCTaTTACTaAAAaaCAaaCTACTaTACCrACAaaTTTAAaCAaACACr	ATATGGTTATCTTCCTGTTACTGAAAGGCAGGCTACTGTACCGACAGGTTTAAGCAGACA[CG]CTGAAGCCCTATTGAATCAGGCTGTGGTGGCTGTACCACCGTGCCTGGGGACAGCAGGCC	ATATGGTTATCTTCCTGTTACTGAAAGGCAGGCTACTGTACCGACAGGTTTAAGCAGACA[CG]CTGAAGCCCTATTGAATCAGGCTGTGGTGGCTGTACCACCGTGCCTGGGGACAGCAGGCC	GRCm10															FALSE	Ank3	NM_170730.2	chr10	69533707	70027436	493730	+
-0.547712	-3.60834	-7.45021	2.04499e-06	0.00142165	5.23002	cg43027587	15738551	AAACAACAAATTAATAACAAATCTCTCAATTTCACTCAAACCTACTACAC						cg	F	T	C	II	1	5	146963919	Mus musculus	mm10	AaCAaCAaaTTAaTAaCAAATCTCTCAaTTTCACTCAaaCCTaCTaCACr	ACTAATGGAATAAAGCCCTCCGACAAAAAAAAAAAAAAAAAAAAAAAAAAAAAAAAGAAT[CG]TGCAGCAGGCCTGAGTGAAACTGAGAGATTTGCTACTAACCTGCTGCTCCAAAGGCCAAG	ACTAATGGAATAAAGCCCTCCGACAAAAAAAAAAAAAAAAAAAAAAAAAAAAAAAAGAAT[CG]TGCAGCAGGCCTGAGTGAAACTGAGAGATTTGCTACTAACCTGCTGCTCCAAAGGCCAAG	GRCm10													chr5:146963517-146963807		FALSE	Mtif3	NM_001256100.1	chr5	146963797	146963997	201	-
0.642533	-1.01914	7.44945	2.04749e-06	0.00142165	5.22888	cg41800725	93716928	CRACCTACCTAAACRAAATATAATAAAAACCTTTACCTAATACAACTACC						cg	F	T	C	II	1	4	156084341	Mus musculus	mm10	raCCTaCCTaaACraAATaTaaTaAAAACCTTTaCCTaaTACAACTaCCr	TTTTTTCTCAGAGCAGAAGTTAAAAATTATTCAACACAAAATTCCTGGGCTGTGGAGCAG[CG]GCAGTTGTACCAGGCAAAGGTTTTCACCACATTCCGTCCAGGCAGGCCGTGATAAGAGAG	TTTTTTCTCAGAGCAGAAGTTAAAAATTATTCAACACAAAATTCCTGGGCTGTGGAGCAG[CG]GCAGTTGTACCAGGCAAAGGTTTTCACCACATTCCGTCCAGGCAGGCCGTGATAAGAGAG	GRCm10															FALSE	.	.	.	.	.	.	.
-0.550999	0.29169	-7.44907	2.04873e-06	0.00142165	5.22831	cg29912065	9655211	TAACAATATAAATAAACTTATTCTAACTAATCAACTACTACCTCCAAACA	60664960	TAACAATATAAATAAACTTATTCTAACTAATCAACTACTACCTCCAAACG	T	Red	R	cg	F	T	C	I	1	11	89031395	Mus musculus	mm10	TaaCAaTATAaATaAACTTaTTCTaACTaaTCAaCTaCTaCCTCCAaaCr	TGAACTTGTAGGCTCACAAGCTGTCTCTCTGTGGGCCTGTAGATGAGTCAGAGCTGAAAT[CG]CCTGGAGGCAGCAGCTGACCAGTCAGAACAAGTTCATCTATACTGCCAGTGTATATTGAC	TGAACTTGTAGGCTCACAAGCTGTCTCTCTGTGGGCCTGTAGATGAGTCAGAGCTGAAAT[CG]CCTGGAGGCAGCAGCTGACCAGTCAGAACAAGTTCATCTATACTGCCAGTGTATATTGAC	GRCm10															FALSE	.	.	.	.	.	.	.
0.877326	1.20815	7.44666	2.05672e-06	0.00142165	5.22467	cg47229514	71653324	ACCTACTTAAAAAATATTTTCAACTAATCCTATAACACTAATAACTCTAC						cg	R	B	C	II	1	9	107590999	Mus musculus	mm10	CCTaCTTaaAAaaTaTTTTCAaCTaaTCCTaTaaCACTAaTaaCTCTaCr	TCTCTTGCTTGGCCTGCTTGGAAGGTGTTTTCAGCTGGTCCTGTGGCACTAGTGGCTCTG[CG]GCGTCTCTGGTTCCCGCCAGCCTCCATGGCCTTCTCTGTGCTGCCCTGCAGGCCTGGGCA	TCTCTTGCTTGGCCTGCTTGGAAGGTGTTTTCAGCTGGTCCTGTGGCACTAGTGGCTCTG[CG]GCGTCTCTGGTTCCCGCCAGCCTCCATGGCCTTCTCTGTGCTGCCCTGCAGGCCTGGGCA	GRCm10														chr9:107587474-107588171	FALSE	Ifrd2	NM_025903.2	chr9	107587717	107593038	5322	+
0.51273	-1.10903	7.44666	2.05672e-06	0.00142165	5.22467	cg32501733	70636983	CAACAATTACTTTCATCCACTTAATAATCCTACCRAACCCAATCAACTAC						cg	R	B	C	II	1	14	54793814	Mus musculus	mm10	AACAaTTaCTTTCATCCACTTAATaATCCTaCCraaCCCAaTCAaCTACr	CCAGGCTTGTGCAACAGTTGCTTTCATCCACTTAATGATCCTGCCGGGCCCAGTCAGCTA[CG]TCTAGTTTTCTGAAATGAAGGTTATTTTCCTAACTGGACATGGCTGCACACATTGTAAAC	CCAGGCTTGTGCAACAGTTGCTTTCATCCACTTAATGATCCTGCCGGGCCCAGTCAGCTA[CG]TCTAGTTTTCTGAAATGAAGGTTATTTTCCTAACTGGACATGGCTGCACACATTGTAAAC	GRCm10															FALSE	.	.	.	.	.	.	.
0.771089	3.33506	7.44592	2.05916e-06	0.00142165	5.22356	cg32636869	6657969	TTATCACTCACTCAATAATAACAATAATAATACTAATAATAAACTCTTAC						cg	R	B	C	II	1	14	69004363	Mus musculus	mm10	TATCACTCACTCAATaATaaCAATAATAATACTAATAATAAaCTCTTACr	ACTGAACTTAATTATCACTCACTCAATGATGGCAATAATAATACTAATAATAAGCTCTTA[CG]TCAGCACTTTTCAACTTTTTAAATCGCCTCGCCGTGCTTTATCTGCCTAGGCAGGCAGTG	ACTGAACTTAATTATCACTCACTCAATGATGGCAATAATAATACTAATAATAAGCTCTTA[CG]TCAGCACTTTTCAACTTTTTAAATCGCCTCGCCGTGCTTTATCTGCCTAGGCAGGCAGTG	GRCm10															FALSE	.	.	.	.	.	.	.
0.64213	-1.30187	7.44584	2.05941e-06	0.00142165	5.22345	cg42493331	58637949	AAAATAAACACCTAAAAACCRACTATTAATAAATAACCAACCAAAAACCC						cg	F	T	C	II	1	5	101728637	Mus musculus	mm10	AAATAAaCACCTaAAAaCCraCTaTTAATAAATAaCCAaCCAAAaACCCr	GATTGGTCTCACGGCTCTTAGCAGTATTTTGATTTTCTTCCAAAACTAAATTGTACTTTA[CG]GGTCTTTGGCTGGCTATTTATTAACAGCCGGCTTTCAGGTGCTTATTTTCCTAGTTAGGG	GATTGGTCTCACGGCTCTTAGCAGTATTTTGATTTTCTTCCAAAACTAAATTGTACTTTA[CG]GGTCTTTGGCTGGCTATTTATTAACAGCCGGCTTTCAGGTGCTTATTTTCCTAGTTAGGG	GRCm10															FALSE	.	.	.	.	.	.	.
0.629685	0.617424	7.44505	2.06204e-06	0.00142165	5.22225	cg29748261	5604178	TATTAAAATAACAACTATAAAAATCTCCTTCTAACCCCTACCTAATCTAC						cg	F	T	C	II	1	11	73268040	Mus musculus	mm10	ATTaAaATAaCAaCTATaaAaaTCTCCTTCTaaCCCCTaCCTaaTCTaCr	GAAATACCATGTCACACCTGCCAAGGCTCTGACACTGATTGAAGCAGCCTGTCCTAGGGA[CG]CAGACCAGGCAGGGGCCAGAAGGAGACCTCCATAGCTGCTATCTCAATAACCCGTGAGTG	GAAATACCATGTCACACCTGCCAAGGCTCTGACACTGATTGAAGCAGCCTGTCCTAGGGA[CG]CAGACCAGGCAGGGGCCAGAAGGAGACCTCCATAGCTGCTATCTCAATAACCCGTGAGTG	GRCm10															FALSE	Trpv3	NM_145099.2	chr11	73267619	73297200	29582	+
0.610409	0.751014	7.43903	2.08214e-06	0.00143205	5.21318	cg43432458	95664351	CAAAACTCAACRAATAAAAATACTTACTACCAACCTAAATTCAATCACTC						cg	F	T	C	II	1	6	52679871	Mus musculus	mm10	AAaaCTCAaCraaTAAAaaTaCTTaCTaCCAACCTaAaTTCAATCACTCr	AAGCGTGTGGAGATGAGGACAATTTGTTAGAGTCACTTCTCTCTTCGGACCACGTGGGTT[CG]AGTGATTGAACTCAGGTTGGCAGCAAGCACCTTTACCCGCTGAGCCTTGTGACTCTATTT	AAGCGTGTGGAGATGAGGACAATTTGTTAGAGTCACTTCTCTCTTCGGACCACGTGGGTT[CG]AGTGATTGAACTCAGGTTGGCAGCAAGCACCTTTACCCGCTGAGCCTTGTGACTCTATTT	GRCm10															FALSE	.	.	.	.	.	.	.
-0.911797	-3.7448	-7.43259	2.10387e-06	0.0014381	5.20347	cg34184245	61768920	CCTCTAAAACCCCAATAAAATCCTAAACTAAAAAACRTTAAACCTATCAC						cg	F	T	C	II	1	16	44139387	Mus musculus	mm10	CTCTAAaaCCCCAaTAAAATCCTaaaCTaaAAaACrTTAAaCCTATCACr	CGGATAACTTGGCGATCCTCCAGCAGGCAAACCTCACAGGGTTTTTTTTTTTTTAAATCA[CG]TGATAGGCTTAACGTCTTCCAGCCCAGGATTTTACTGGGGCCTTAGAGGCGGGACTCATG	CGGATAACTTGGCGATCCTCCAGCAGGCAAACCTCACAGGGTTTTTTTTTTTTTAAATCA[CG]TGATAGGCTTAACGTCTTCCAGCCCAGGATTTTACTGGGGCCTTAGAGGCGGGACTCATG	GRCm10		chr16:44139650-44140488													FALSE	Naa50	NM_028108.3	chr16	44138308	44139608	1301	+
-1.39845	-5.74002	-7.43178	2.10661e-06	0.0014381	5.20225	cg29054388	51617541	CAAATCCAAACCAAAAAAATACAACAAACTACATATATCTAACTATAACA	60779586	CGAATCCGAACCGAAAAAATACAACGAACTACGTATATCTAACTATAACG	T	Red	R	cg	R	B	C	I	1	10	118868902	Mus musculus	mm10	CraaTCCraaCCrAaaaaATaCAaCraACTaCrTaTaTCTaaCTaTAaCr	GGCTCGCGGCGGCGGGTCCGGGCCGAGGGGATGCAGCGGACTGCGTGTGTCTGGCTGTAG[CG]GGAGCGAGGCGGCGACGAGGCGCGGGTGACCCGCGTGAGGGGCGACCAGGAGGCGGCGGC	GGCTCGCGGCGGCGGGTCCGGGCCGAGGGGATGCAGCGGACTGCGTGTGTCTGGCTGTAG[CG]GGAGCGAGGCGGCGACGAGGCGCGGGTGACCCGCGTGAGGGGCGACCAGGAGGCGGCGGC	GRCm10			chr10:118867982-118869486	chr10	118867982	118869486	1504	155	943	20.6	62.7	1.05			FALSE	Dyrk2	NM_001014390.2	chr10	118859348	118868903	9556	-
1.04753	-3.54168	7.43076	2.11007e-06	0.0014381	5.20072	cg38795561	33787885	CAAACACACAATAAAACTACACAAAATATACAAAATTATAATTTACTCCA	63766979	CGAACACACAATAAAACTACACAAAATATACGAAATTATAATTTACTCCG	G	Grn	G	cg	F	T	C	I	1	2	109693021	Mus musculus	mm10	CrAACACACAATaAAACTACACAaAaTaTaCraaaTTATaaTTTACTCCr	TAGGCACACTCCGGAGAGGTCAGGGCGCAAACTCTGGTTAAGCCGATGTGTTTAAGGTAG[CG]GAGTAAACCATAACCCCGCACACTCTGTGTAGTTTCATTGTGTGTTCGCTTTTTCTAGCT	TAGGCACACTCCGGAGAGGTCAGGGCGCAAACTCTGGTTAAGCCGATGTGTTTAAGGTAG[CG]GAGTAAACCATAACCCCGCACACTCTGTGTAGTTTCATTGTGTGTTCGCTTTTTCTAGCT	GRCm10		chr2:109693466-109694207													FALSE	Bdnf	NM_007540.4	chr2	109674699	109727043	52345	+
-0.69526	2.45281	-7.43048	2.11104e-06	0.0014381	5.20029	cg33674228	7733976	ATTAACTTACCTCCTAAAAACRAAACTTTCCAAAAAACRAAACCTATTCC						cg	F	T	C	II	1	15	89410376	Mus musculus	mm10	TTaaCTTaCCTCCTAAaaACraaACTTTCCAaaaaaCraaaCCTaTTCCr	AAGCAACCTCCGGCCACCCAAACCCCAGGGTAAGACCAGGTAAGGCCAAGTCGAAGACCA[CG]GAACAGGCCCCGCCCCCTGGAAAGTCCCGTCCTTAGGAGGCAAGCCAATGAGGGCGAGAG	AAGCAACCTCCGGCCACCCAAACCCCAGGGTAAGACCAGGTAAGGCCAAGTCGAAGACCA[CG]GAACAGGCCCCGCCCCCTGGAAAGTCCCGTCCTTAGGAGGCAAGCCAATGAGGGCGAGAG	GRCm10			chr15:89410048-89410386	chr15	89410048	89410386	338	29	231	17.2	68.3	0.74			FALSE	Syce3	NM_001162880.1	chr15	89390173	89410503	20331	-
0.615174	-1.33076	7.42063	2.14484e-06	0.00145765	5.18543	cg38441964	57798587	TCATACACTAACTCAAACTAAAACRACAAATAATCCAAACTCTAAACCTC						cg	F	T	C	II	1	2	60655055	Mus musculus	mm10	CATaCACTaaCTCAaACTaaaaCraCAAaTAATCCAaACTCTAaACCTCr	ATCAAGTAGCTTTTGGTTGGGCTGATAGGCAATAGTAAGAACTGACTACACACCCTGGAA[CG]AGGTCTAGAGTCTGGATTACTTGCCGCCCCAGTCTGAGCCAGTGCATGACAATACACAGC	ATCAAGTAGCTTTTGGTTGGGCTGATAGGCAATAGTAAGAACTGACTACACACCCTGGAA[CG]AGGTCTAGAGTCTGGATTACTTGCCGCCCCAGTCTGAGCCAGTGCATGACAATACACAGC	GRCm10															FALSE	Itgb6	NM_021359.3	chr2	60598291	60673693	75403	-
0.446665	-0.664059	7.41811	2.15356e-06	0.00146011	5.18164	cg30305472	81653257	AACACCTAAAATAACACAAAACTCTCTAAATCCCTACTCAATAAAACTAC						cg	R	B	C	II	1	11	121519456	Mus musculus	mm10	aCACCTaaAaTaaCACAaaACTCTCTaaATCCCTaCTCAaTaAaaCTACr	GAGTCCTGTGGGGCACCTGGAGTGGCACAGGACTCTCTGGATCCCTGCTCAGTGAGGCTA[CG]TGGAGCTCAGTGGGTGCAAACACTTGAATTGTAGCTGCAGGCGGAGGAATATCAGGTGCA	GAGTCCTGTGGGGCACCTGGAGTGGCACAGGACTCTCTGGATCCCTGCTCAGTGAGGCTA[CG]TGGAGCTCAGTGGGTGCAAACACTTGAATTGTAGCTGCAGGCGGAGGAATATCAGGTGCA	GRCm10															FALSE	Tbcd	NM_029878.3	chr11	121451948	121617170	165223	+
-0.714911	2.73324	-7.41503	2.16429e-06	0.00146184	5.17699	cg37506537	12683558	TACCCATAATTCACTTTACCTCTCAACCTTATATTTTCAAAATTCTAAAC						cg	F	T	C	II	1	1	135604636	Mus musculus	mm10	ACCCATaaTTCACTTTaCCTCTCAaCCTTATaTTTTCAAAATTCTaaaCr	GGGTATCAAAAGGAGGTGAGAAGTGGGAGGTGGAAGGCAGTTCAGTATCTGGGATGGCCA[CG]CCCAGAATTTTGAAAACATAAGGCTGAGAGGCAAAGTGAACCATGGGTAACAGACTTGTT	GGGTATCAAAAGGAGGTGAGAAGTGGGAGGTGGAAGGCAGTTCAGTATCTGGGATGGCCA[CG]CCCAGAATTTTGAAAACATAAGGCTGAGAGGCAAAGTGAACCATGGGTAACAGACTTGTT	GRCm10															FALSE	.	.	.	.	.	.	.
0.52342	-0.843274	7.41445	2.16632e-06	0.00146184	5.17611	cg47430499	81643105	CTAAAACRCTATACRTAAACCAAAAAAACAATTAATTCTTCTCTACTTAC						cg	R	B	C	II	1	X	7899308	Mus musculus	mm10	TaAaaCrCTaTACrTAaACCAAaaaAACAATTaaTTCTTCTCTaCTTACr	GCCCACAAGCTCTGAGGCGCTGTACGTAGACCAAGGGAACAATTGGTTCTTCTCTGCTTA[CG]TAAGGCCAACGGCGCGCTCTTATTGGCTAGCCAGAAGGGCCACATCCGTTCCATGTAAGC	GCCCACAAGCTCTGAGGCGCTGTACGTAGACCAAGGGAACAATTGGTTCTTCTCTGCTTA[CG]TAAGGCCAACGGCGCGCTCTTATTGGCTAGCCAGAAGGGCCACATCCGTTCCATGTAAGC	GRCm10			chrX:7899237-7899651	chrX	7899237	7899651	414	43	269	20.8	65	0.99			FALSE	Timm17b	NM_001313693.1	chrX	7898176	7899476	1301	+
1.11078	-3.1385	7.4056	2.19751e-06	0.00147939	5.16273	cg41325135	91712850	ATTATAATTAAATACRTAATAAATTCCCAAAAAACRTATCAACTCCCTCC						cg	R	B	C	II	1	4	117304065	Mus musculus	mm10	TTaTAATTaaaTaCrTaATAAATTCCCAAaaAaCrTaTCAaCTCCCTCCr	TGCCAATTAACATTGTAATTGGGTGCGTGATAAATTCCCAAGGAGCGTGTCAGCTCCCTC[CG]GGCTGACGGGCAGCGTGAGCGAGGGTCCCCAGCCTGGTTGCCCTTGCCCCGCCCGGTGCT	TGCCAATTAACATTGTAATTGGGTGCGTGATAAATTCCCAAGGAGCGTGTCAGCTCCCTC[CG]GGCTGACGGGCAGCGTGAGCGAGGGTCCCCAGCCTGGTTGCCCTTGCCCCGCCCGGTGCT	GRCm10		chr4:117304189-117304546													FALSE	Rnf220	NM_001310729.1	chr4	117271462	117375461	104000	-
0.642994	0.62568	7.40088	2.21435e-06	0.00148682	5.15559	cg47111233	71787380	AAAATTATACTATTCTTTTCAAAAACTATTTCTTCTTTTTTTCCCCCTTC						cg	F	T	C	II	1	9	95795025	Mus musculus	mm10	AAaTTATACTATTCTTTTCAAAaACTaTTTCTTCTTTTTTTCCCCCTTCr	GAGGAAAGTACAAAGCTGCTAAGCCGATAATGTCAAATTGAAACCTGGGATTTCAGAGAA[CG]AAGGGGGAAAAAAAGAAGAAACAGTCTTTGAAAAGAATAGTATAACTTTAAAAAAAAATT	GAGGAAAGTACAAAGCTGCTAAGCCGATAATGTCAAATTGAAACCTGGGATTTCAGAGAA[CG]AAGGGGGAAAAAAAGAAGAAACAGTCTTTGAAAAGAATAGTATAACTTTAAAAAAAAATT	GRCm10															FALSE	Pls1	NM_001033210.3	chr9	95752641	95845279	92639	-
0.48856	0.0689498	7.3996	2.21893e-06	0.00148682	5.15365	cg29917771	31667339	AAAACTTAATAATCATAAACTTCAACTCTTACCTAAAATAATCCTATTCA	49668320	AAAACTTAATAATCATAAACTTCAACTCTTACCTAAAATAATCCTATTCG	G	Grn	G	cg	R	B	C	I	1	11	89538574	Mus musculus	mm10	aAAaCTTAaTaATCATaaACTTCAaCTCTTaCCTaaAaTaATCCTaTTCr	TTCGCTTTAGAAGAAGCTTAGTGATCATGGACTTCAGCTCTTGCCTGGAGTGATCCTGTT[CG]CATTTTATTCTTTGCACAGAATAGGAAGGAGGTTCGCTTGCTTTGCGCAGAGGCTGAGCT	TTCGCTTTAGAAGAAGCTTAGTGATCATGGACTTCAGCTCTTGCCTGGAGTGATCCTGTT[CG]CATTTTATTCTTTGCACAGAATAGGAAGGAGGTTCGCTTGCTTTGCGCAGAGGCTGAGCT	GRCm10															FALSE	Ankfn1	NM_001327810.1	chr11	89390222	89696936	306715	-
0.470119	-1.13932	7.39369	2.24025e-06	0.00149484	5.14471	cg29955080	19784529	TACTAAAAATCACAACTCCTATAAATTCTAACAACTAAACATTCCATTCC						cg	F	T	C	II	1	11	94591826	Mus musculus	mm10	aCTaaAAATCACAaCTCCTaTaAaTTCTaaCAaCTaAaCATTCCATTCCr	AAACATCTCAGATGAAGAGGTGGGAAGAGTGTAAGAGCTGGGGAAGACAAAGGAGGCGTA[CG]GAATGGAATGCTCAGCTGCCAGAACTCACAGGAGCTGTGATTTCCAGCACAGGATCTGGG	AAACATCTCAGATGAAGAGGTGGGAAGAGTGTAAGAGCTGGGGAAGACAAAGGAGGCGTA[CG]GAATGGAATGCTCAGCTGCCAGAACTCACAGGAGCTGTGATTTCCAGCACAGGATCTGGG	GRCm10															FALSE	Acsf2	NM_153807.2	chr11	94557101	94601786	44686	-
0.484717	-0.857684	7.3926	2.24419e-06	0.00149484	5.14306	cg29784031	17672464	ACATAATATCAAAACATAATAATATACATTCAAAAACCACCATCTATCAC						cg	F	T	C	II	1	11	76946646	Mus musculus	mm10	CATAATATCAAAACATaATaATATaCATTCAAAaACCACCATCTaTCACr	CATCACCTGTGTGGTGGCTTCAGTGTTCTGTGGCCTATTAGCATTTAGTTTGTTTCCTAA[CG]TGACAGATGGTGGTCTTTGAATGCATATCATCATGTTTTGATATTATGTGATGTTGGATG	CATCACCTGTGTGGTGGCTTCAGTGTTCTGTGGCCTATTAGCATTTAGTTTGTTTCCTAA[CG]TGACAGATGGTGGTCTTTGAATGCATATCATCATGTTTTGATATTATGTGATGTTGGATG	GRCm10													chr11:76945520-76946099		FALSE	Blmh	NM_178645.4	chr11	76945655	76987389	41735	+
0.656186	-1.23444	7.39149	2.24821e-06	0.00149484	5.14138	cg35561046	47734104	CCTAAAATAAACCCAACTCTAAAAACCACRAAATTATCTATCTATAAACC						cg	F	T	C	II	1	18	32136452	Mus musculus	mm10	CTAaAaTAAaCCCAaCTCTAAAaaCCACrAaATTaTCTaTCTaTaaACCr	AAAGGACGTTTGTGAGCTCATTGTCTGTGTGGAAGCTGGGTCTGGGAGTGGGGTACACCA[CG]GTCCACAGACAGACAATCTCGTGGCCTTTAGAGCTGGGCTTACTCTAGGTACATGAAAGC	AAAGGACGTTTGTGAGCTCATTGTCTGTGTGGAAGCTGGGTCTGGGAGTGGGGTACACCA[CG]GTCCACAGACAGACAATCTCGTGGCCTTTAGAGCTGGGCTTACTCTAGGTACATGAAAGC	GRCm10															FALSE	Proc	NM_001042768.3	chr18	32123125	32138205	15081	-
0.475658	-0.20273	7.39051	2.25179e-06	0.00149484	5.13989	cg29918350	95680593	TTACAAACACACRACTATTTATTTAAACAATCTCTCCTAACACCTTCCTC						cg	F	T	C	II	1	11	89606987	Mus musculus	mm10	TaCAAaCACACrACTaTTTATTTaAACAaTCTCTCCTaACACCTTCCTCr	TGAAGCGTTTTGGGATGGAGGGTATAGTATAGCAGCAGGTATCACGGGGACAATGACAAA[CG]AGGAAGGTGTCAGGAGAGACTGTTCAAATAAACAGTCGTGTGCTTGCAAGTACAGCTTGA	TGAAGCGTTTTGGGATGGAGGGTATAGTATAGCAGCAGGTATCACGGGGACAATGACAAA[CG]AGGAAGGTGTCAGGAGAGACTGTTCAAATAAACAGTCGTGTGCTTGCAAGTACAGCTTGA	GRCm10															FALSE	Ankfn1	NM_001327810.1	chr11	89390222	89696936	306715	-
0.507686	-1.21482	7.38434	2.27439e-06	0.00150634	5.13055	cg43448209	80697542	TTACTAATTTCTAAAAAAATTCTTTACCCAACAACTCTCCAACAAAAACC						cg	F	T	C	II	1	6	54330307	Mus musculus	mm10	TaCTaaTTTCTAaAAAAaTTCTTTaCCCAaCAaCTCTCCAACAaaAaCCr	TCGTCGTATTTAAAGGCAGGCACGCAAGGTCTTCAATGACAGGGTTAATCATTTACCACA[CG]GCTCCTGTTGGAGAGCTGCTGGGCAAAGAACTTTTCTAGAAACCAGCAACACCCAGCTGG	TCGTCGTATTTAAAGGCAGGCACGCAAGGTCTTCAATGACAGGGTTAATCATTTACCACA[CG]GCTCCTGTTGGAGAGCTGCTGGGCAAAGAACTTTTCTAGAAACCAGCAACACCCAGCTGG	GRCm10														chr6:54326915-54327286	FALSE	9130019P16Rik	NR_033635.1	chr6	54269680	54430221	160542	-
0.442849	-0.0999623	7.38025	2.28947e-06	0.00151234	5.12436	cg33437581	87708550	TTTAAATACTCTATAACTCCTATCCCAAACTCTCTTCCTATCCTATACTC						cg	R	B	C	II	1	15	66966933	Mus musculus	mm10	TTaaATaCTCTaTaaCTCCTaTCCCAaACTCTCTTCCTATCCTATACTCr	GCAAATGATCCTTTGGATGCTCTGTGGCTCCTGTCCCAGACTCTCTTCCTATCCTATACT[CG]CTCTGCTATGGCTACACCCCCAGTGCTAGTCATTACGTTGGCTTGCCTCAGAAGGTACAG	GCAAATGATCCTTTGGATGCTCTGTGGCTCCTGTCCCAGACTCTCTTCCTATCCTATACT[CG]CTCTGCTATGGCTACACCCCCAGTGCTAGTCATTACGTTGGCTTGCCTCAGAAGGTACAG	GRCm10		chr15:66968584-66970105													FALSE	Ndrg1	NM_008681.2	chr15	66929317	66969641	40325	-
0.548779	0.392934	7.37903	2.29401e-06	0.00151234	5.1225	cg29031063	50790821	TACTAAACATAAAATATCTTCCATACTATTATCTTACAAAACACTTCCCC						cg	F	T	C	II	1	10	116965623	Mus musculus	mm10	aCTaAaCATaAAATaTCTTCCATaCTaTTaTCTTACAaAaCACTTCCCCr	TAAAGATCCCCCTTTCTTGAGCCCGCCCATCTCATGGGTCTGAATAAAATGGTCACCATA[CG]GGGAAGTGCTCTGTAAGACAACAGCATGGAAGACATTTCATGCTCAGCACTATGAAGTTA	TAAAGATCCCCCTTTCTTGAGCCCGCCCATCTCATGGGTCTGAATAAAATGGTCACCATA[CG]GGGAAGTGCTCTGTAAGACAACAGCATGGAAGACATTTCATGCTCAGCACTATGAAGTTA	GRCm10															FALSE	D630029K05Rik	NR_027847.1	chr10	116964739	116969108	4370	+
0.703556	0.809871	7.3758	2.30603e-06	0.00151676	5.11761	cg31034999	59772117	TACTAACCAATCTCTATAAAACACCATATCCRATTAACAAATAAAACAAC						cg	F	T	C	II	1	12	102394831	Mus musculus	mm10	aCTaaCCAATCTCTaTaAaaCACCATATCCrATTaACAaaTAAAaCAaCr	GCCAGTGGTGCCCTCCCCAGTACATCTGGAATGATGCCCATCTTCCCAGTGCCAGCCAAG[CG]CTGCTTTACCTGTCAATCGGATATGGTGCCTCACAGAGATTGGCCAGCACATACAAGTAC	GCCAGTGGTGCCCTCCCCAGTACATCTGGAATGATGCCCATCTTCCCAGTGCCAGCCAAG[CG]CTGCTTTACCTGTCAATCGGATATGGTGCCTCACAGAGATTGGCCAGCACATACAAGTAC	GRCm10															FALSE	Lgmn	NM_011175.2	chr12	102394097	102439697	45601	-
0.64926	0.231972	7.36504	2.34657e-06	0.00153989	5.10129	cg43712796	50704495	ATTTTCTTATCACAAAACCATAAACATACTATAACTTTATAAAACTACCC						cg	F	T	C	II	1	6	92812865	Mus musculus	mm10	TTTTCTTaTCACAaaaCCATaAACATaCTaTaACTTTaTAaAACTaCCCr	AAACTTGAAATATGCTCAAAAGGGGCCCCGATTCCTGTTCTGGGCCAAACAGCAACAGAT[CG]GGCAGTTCTACAAAGTCACAGCATGTTCATGGCCCTGTGACAAGAAAACACAGCAGCTGC	AAACTTGAAATATGCTCAAAAGGGGCCCCGATTCCTGTTCTGGGCCAAACAGCAACAGAT[CG]GGCAGTTCTACAAAGTCACAGCATGTTCATGGCCCTGTGACAAGAAAACACAGCAGCTGC	GRCm10															FALSE	Adamts9	NM_175314.3	chr6	92772698	92901441	128744	-
0.572972	-1.52262	7.36284	2.35499e-06	0.00154188	5.09794	cg37710295	51703222	AAAAAACRTCAAAAAATTTTCCTATTCRTATATCCAATACCTCCAACACC						cg	F	T	C	II	1	1	164411861	Mus musculus	mm10	AAaAACrTCAAAAaATTTTCCTaTTCrTaTaTCCAATaCCTCCAACACCr	GCAGGAAACTTCATTGCCTATTGTTTACAGAAAGTTCCTCACATGGCTTTAGTATCTTCA[CG]GTGTTGGAGGCATTGGACACACGAACAGGAAAATCTTTTGACGTTCTTTAAAGGCTTGGA	GCAGGAAACTTCATTGCCTATTGTTTACAGAAAGTTCCTCACATGGCTTTAGTATCTTCA[CG]GTGTTGGAGGCATTGGACACACGAACAGGAAAATCTTTTGACGTTCTTTAAAGGCTTGGA	GRCm10															FALSE	Nme7	NM_001293313.1	chr1	164307671	164437300	129630	+
-1.0119	-0.680467	-7.36006	2.36562e-06	0.0015453	5.09372	cg29896955	73745828	AAAATCTTTTTATTTTCRAATCAAACTTAAATTAAAAACCTTCCCACAAC						cg	R	B	C	II	1	11	87898290	Mus musculus	mm10	aAaTCTTTTTATTTTCrAaTCAaACTTaAATTaAAAACCTTCCCACAaCr	AATTGTGCATAAGAGTCTTTTTATTTTCGAGTCAGACTTGAATTGAAAACCTTCCCACAG[CG]CAGGACAGGAGTGCGACCCTGAGCTTGGAAGGCTTGGCACTTGTATACAGCATAGAGATT	AATTGTGCATAAGAGTCTTTTTATTTTCGAGTCAGACTTGAATTGAAAACCTTCCCACAG[CG]CAGGACAGGAGTGCGACCCTGAGCTTGGAAGGCTTGGCACTTGTATACAGCATAGAGATT	GRCm10															FALSE	.	.	.	.	.	.	.
0.527324	-2.01828	7.35671	2.37849e-06	0.00155017	5.08864	cg38001014	81633427	TCCTTCATTCRCCTCTAAACCCAATAAATAACTCTTCATATAAACAAAAC						cg	R	B	C	II	1	2	3704844	Mus musculus	mm10	CCTTCATTCrCCTCTaaACCCAATAAaTaACTCTTCATATaAACAAAACr	AACTCACTGTGTCCTTCATTCGCCTCTGGACCCAATAAGTGACTCTTCATATGAACAAAA[CG]TTCCACAGTAGTAGTTTTGCCAACAGACTTGGTTGGGGAGCAAAACTGTTTGATCTACTT	AACTCACTGTGTCCTTCATTCGCCTCTGGACCCAATAAGTGACTCTTCATATGAACAAAA[CG]TTCCACAGTAGTAGTTTTGCCAACAGACTTGGTTGGGGAGCAAAACTGTTTGATCTACTT	GRCm10															FALSE	.	.	.	.	.	.	.
0.563845	-0.438257	7.34962	2.40601e-06	0.00156454	5.07786	cg36143712	52610292	ACRCAAAAAACTTAAACATCTATAAACACCTAAAACCAATTATAAATACC						cg	R	B	C	II	1	19	10188282	Mus musculus	mm10	CrCAaaaaACTTaAACATCTaTaaACACCTaaAACCAATTaTaAATACCr	GATGCCACTTCACGCAGGGGACTTGAACATCTGTGGACACCTGGAACCAATTGTGAATAC[CG]CTGTACTTTTCCCTCCCATTTGAGGCCAGCCCGTCTTTCAGCGTGATCAGCATTGGCTTT	GATGCCACTTCACGCAGGGGACTTGAACATCTGTGGACACCTGGAACCAATTGTGAATAC[CG]CTGTACTTTTCCCTCCCATTTGAGGCCAGCCCGTCTTTCAGCGTGATCAGCATTGGCTTT	GRCm10															FALSE	Fads1	NM_146094.2	chr19	10182887	10196874	13988	+
0.9458	2.39172	7.34535	2.42274e-06	0.00156792	5.07137	cg35052908	76807342	ATTTAACCCTTTATATCAAAATATAATTAATCAATACCCAAATCCCCTTC						cg	R	B	C	II	1	17	56278391	Mus musculus	mm10	TTTAACCCTTTaTaTCAAaATATaATTaaTCAaTACCCAaaTCCCCTTCr	GTTAAGTCCTTGTTTAACCCTTTGTGTCAAGATATGATTGGTCAGTACCCAGGTCCCCTT[CG]CTTTGTGTTCCCATCCTATAAAAAGCGTCGTGCAGTCTCTCATCAGGGTTCAGATCCCCA	GTTAAGTCCTTGTTTAACCCTTTGTGTCAAGATATGATTGGTCAGTACCCAGGTCCCCTT[CG]CTTTGTGTTCCCATCCTATAAAAAGCGTCGTGCAGTCTCTCATCAGGGTTCAGATCCCCA	GRCm10															FALSE	.	.	.	.	.	.	.
-0.657203	-4.5995	-7.34412	2.42759e-06	0.00156792	5.06949	cg38890290	78749833	AACATCTAACCTCATAATACTTCTTTTTATTACAACCACTACACTATATC						cg	F	T	C	II	1	2	122028087	Mus musculus	mm10	ACATCTAACCTCATAATaCTTCTTTTTaTTaCAaCCACTaCACTaTaTCr	TCCCAGGCTTATTCTAGTTTGTCCTCAACACAGTAGCAAAATAGTTATGTAAACAGATTT[CG]ACACAGTGCAGTGGCTGCAACAAAAAGAAGCATTATGAGGTTAGATGTTAAAAAGGTAGC	TCCCAGGCTTATTCTAGTTTGTCCTCAACACAGTAGCAAAATAGTTATGTAAACAGATTT[CG]ACACAGTGCAGTGGCTGCAACAAAAAGAAGCATTATGAGGTTAGATGTTAAAAAGGTAGC	GRCm10		chr2:122028148-122029310													FALSE	Eif3j1	NM_144545.4	chr2	122027079	122028379	1301	+
0.647437	0.363583	7.34411	2.42765e-06	0.00156792	5.06947	cg40056656	88799417	CACTAATTTCAAATTCTAAAATAAATTCTCCATTCTTCATACCTCCTTCC						cg	R	B	C	II	1	3	95884569	Mus musculus	mm10	ACTaATTTCAaaTTCTAAaaTaaATTCTCCATTCTTCATaCCTCCTTCCr	TATGCAAACGCCACTGATTTCAGGTTCTAAGGTGGATTCTCCATTCTTCATGCCTCCTTC[CG]CCTCCTGCTGAACTTTGCCTCTTGGCTCTACAGGGTTGTAGGACACACCCATTTTGACCT	TATGCAAACGCCACTGATTTCAGGTTCTAAGGTGGATTCTCCATTCTTCATGCCTCCTTC[CG]CCTCCTGCTGAACTTTGCCTCTTGGCTCTACAGGGTTGTAGGACACACCCATTTTGACCT	GRCm10													chr3:95881904-95882938		FALSE	C920021L13Rik	NR_040446.1	chr3	95871521	95889093	17573	+
0.548214	-1.52024	7.34242	2.43432e-06	0.00156869	5.0669	cg45816204	5779859	CTATAATATTTAACAACAAATTAAAATAACCTCCACCCACAACAAATCAC						cg	R	B	C	II	1	8	70723588	Mus musculus	mm10	TATaATaTTTaACAaCAaATTaAAaTaACCTCCACCCACAaCAaaTCACr	CTCCCTCGTTGCTATGATGTTTGACAGCAGATTGAAGTGACCTCCACCCACAGCAGGTCA[CG]CTCTGATGACCACTGGAGTAGGTGGTGAGAGGTCTCCTGGCCTGTCTGTGGGGGAGGGGT	CTCCCTCGTTGCTATGATGTTTGACAGCAGATTGAAGTGACCTCCACCCACAGCAGGTCA[CG]CTCTGATGACCACTGGAGTAGGTGGTGAGAGGTCTCCTGGCCTGTCTGTGGGGGAGGGGT	GRCm10															FALSE	Pde4c	NM_201607.2	chr8	70722563	70723863	1301	+
0.567666	-1.5176	7.33783	2.45252e-06	0.00157687	5.05992	cg39587159	20750434	TACTACCTACTATATCATACRTTCCTCAATAAAATAAATAATCTATCCAC						cg	F	T	C	II	1	3	28705922	Mus musculus	mm10	ACTaCCTaCTaTATCATACrTTCCTCAaTaAaATAaATAATCTaTCCACr	GGCCAAATTATCAGCTGTGCACATTGTACCTGGCTGGCCAGGATTGCCCCGTGTCTTTCA[CG]TGGACAGATTATCTATCTCACTGAGGAACGTATGATACAGCAGGCAGTAGGAACGAAGAG	GGCCAAATTATCAGCTGTGCACATTGTACCTGGCTGGCCAGGATTGCCCCGTGTCTTTCA[CG]TGGACAGATTATCTATCTCACTGAGGAACGTATGATACAGCAGGCAGTAGGAACGAAGAG	GRCm10															FALSE	Slc2a2	NM_031197.2	chr3	28697902	28728361	30460	+
0.671457	0.466652	7.33091	2.48025e-06	0.00159112	5.04938	cg44840819	10710875	TTAATTACCACAACCTTTAAACCTTTAATAATTTACTCAAAATTACAAAC						cg	R	B	C	II	1	7	90043681	Mus musculus	mm10	TAATTaCCACAaCCTTTaAACCTTTaaTAaTTTACTCAAaaTTACAaACr	CAGGCAATTTCTTAATTGCCACAGCCTTTGAACCTTTGGTAGTTTACTCAAGGTTACAGA[CG]CAGCGAGTCCTCAGGATCTGTAAGCAGAAGGAGAAGTGGAGTTGAGGACAGCAGTAGGCT	CAGGCAATTTCTTAATTGCCACAGCCTTTGAACCTTTGGTAGTTTACTCAAGGTTACAGA[CG]CAGCGAGTCCTCAGGATCTGTAAGCAGAAGGAGAAGTGGAGTTGAGGACAGCAGTAGGCT	GRCm10															FALSE	E230029C05Rik	NR_110365.1	chr7	90029158	90049071	19914	+
0.627038	0.885412	7.32322	2.51146e-06	0.00160302	5.03767	cg30156960	64712373	TACTATACACAAACTAAAAATTAATCAATACCCTTAATACATAACCCAAC						cg	R	B	C	II	1	11	110463357	Mus musculus	mm10	ACTaTaCACAAaCTaaaaATTAaTCAaTACCCTTAATACATaaCCCAACr	TATTCATTTGCTACTGTGCACAAGCTGGGGATTAGTCAGTACCCTTAATACATGGCCCAA[CG]CAAGGCCTGTGCAGATACGCCCTGTGCTAACCTCTCGGTTGCATAATGAGTTGTTATTCC	TATTCATTTGCTACTGTGCACAAGCTGGGGATTAGTCAGTACCCTTAATACATGGCCCAA[CG]CAAGGCCTGTGCAGATACGCCCTGTGCTAACCTCTCGGTTGCATAATGAGTTGTTATTCC	GRCm10															FALSE	Map2k6	NM_011943.2	chr11	110399121	110513637	114517	+
1.68912	-1.88446	7.3213	2.51932e-06	0.00160302	5.03474	cg48169380	20675426	CTAAACAAACTAAAAAACACAAATTAAAAAATCTCATTCCAAATTTAACA	96779357	CTAAACGAACTAAAAAACGCGAATTAAAAAATCTCGTTCCAAATTTAACG	T	Red	R	cg	F	T	C	I	1	X	162760456	Mus musculus	mm10	CTaaaCraaCTaAaAaaCrCraaTTaAAAAaTCTCrTTCCAAaTTTaaCr	TTCTGCCTCCTCCCCGCTGGCGGGTAGCGAGGTCTGAGCCGCTCTCCTCTCTCTCCCTCT[CG]CCAAACTTGGAACGAGACTTTTCAACCCGCGCCTCTCAGCCCGCCCAGGCAGCTGAGCGC	TTCTGCCTCCTCCCCGCTGGCGGGTAGCGAGGTCTGAGCCGCTCTCCTCTCTCTCCCTCT[CG]CCAAACTTGGAACGAGACTTTTCAACCCGCGCCTCTCAGCCCGCCCAGGCAGCTGAGCGC	GRCm10			chrX:162760089-162761400	chrX	162760089	162761400	1311	141	872	21.5	66.5	0.99			FALSE	Rbbp7	NM_009031.3	chrX	162760371	162779090	18720	+
-0.981409	2.7927	-7.32056	2.52233e-06	0.00160302	5.03362	cg29899805	86794123	CAAATCTCTATACATTTAAAACCAACTTAATCTCCATTATAAACTTAATC						cg	F	T	C	II	1	11	88134572	Mus musculus	mm10	AaATCTCTATaCATTTAAaaCCAaCTTaaTCTCCATTATAAaCTTaaTCr	TGCTGCTGTTGTTGTTTTTGAGACAGGGGCTCTCTATGTAGCCCTGGCTGTCCTGTAACT[CG]ACCAAGCTTATAATGGAGACCAAGCTGGCCTTAAATGCATAGAGATCTGCCTGCCTCTGC	TGCTGCTGTTGTTGTTTTTGAGACAGGGGCTCTCTATGTAGCCCTGGCTGTCCTGTAACT[CG]ACCAAGCTTATAATGGAGACCAAGCTGGCCTTAAATGCATAGAGATCTGCCTGCCTCTGC	GRCm10															FALSE	Cuedc1	NM_198013.3	chr11	88099145	88194140	94996	+
0.816461	1.13563	7.32041	2.52295e-06	0.00160302	5.03339	cg40748707	52675239	TAACTCTACTTAATATCTTAAATTAACACAAAAACAACAATAACAAACAC						cg	F	T	C	II	1	4	34629859	Mus musculus	mm10	AaCTCTACTTaaTaTCTTaAaTTAaCACAaAAaCAACAATAaCAaaCACr	AGGCGATTAGAAGTCAAATAGCAAAACTTCTCCCAGTCAAGTGAATGTGTTAAGTTACTA[CG]TGCCTGCTATTGTTGCTTCTGTGCTAACTCAAGACACCAAGTAGAGCTAGCGAATATGTA	AGGCGATTAGAAGTCAAATAGCAAAACTTCTCCCAGTCAAGTGAATGTGTTAAGTTACTA[CG]TGCCTGCTATTGTTGCTTCTGTGCTAACTCAAGACACCAAGTAGAGCTAGCGAATATGTA	GRCm10															FALSE	Rars2	NM_181406.3	chr4	34614957	34660167	45211	+
0.56457	-1.65477	7.31947	2.52682e-06	0.00160302	5.03195	cg33599949	40738214	AACCTTAAAACTAAACTATCTAACTAACTCCAACACTACCAAAACAAACA	43642301	AACCTTAAAACTAAACTATCTAACTAACTCCGACACTACCAAAACAAACG	G	Grn	G	cg	F	T	C	I	1	15	83305644	Mus musculus	mm10	aaCCTTaaaACTaAaCTaTCTaACTaaCTCCraCACTaCCAaaaCAaaCr	CCTGCTGGGATGTGACCCTGGCACAAAGGCGCTCCGCCTCCTCAAGGTCTCCCAGCAGAG[CG]CCTGCCCTGGCAGTGCCGGAGCCAGTCAGACAGCTCAGTCCCAAGGCCAAGGCTGTTGAA	CCTGCTGGGATGTGACCCTGGCACAAAGGCGCTCCGCCTCCTCAAGGTCTCCCAGCAGAG[CG]CCTGCCCTGGCAGTGCCGGAGCCAGTCAGACAGCTCAGTCCCAAGGCCAAGGCTGTTGAA	GRCm10															FALSE	Arfgap3	NM_025445.4	chr15	83299739	83350247	50509	-
0.910377	-5.05439	7.31403	2.54929e-06	0.00161202	5.02365	cg43317460	5678941	CAAAACAAAAACCRAAACTAAACTTAAACTCTACCTACAAACAATAAATC						cg	R	B	C	II	1	6	37300152	Mus musculus	mm10	AaAaCAAAAaCCraaACTaAACTTaAACTCTaCCTaCAaaCAATaaATCr	TTTTCTAAATCCAGAGCAAAAGCCGGGACTGAACTTGAACTCTGCCTGCAGGCAATGGAT[CG]CAGTGGAGGAGAGAGGGAAAGGGTGGGAGCCGCGGGGCTTAGGACGCTGGGGACAAACAC	TTTTCTAAATCCAGAGCAAAAGCCGGGACTGAACTTGAACTCTGCCTGCAGGCAATGGAT[CG]CAGTGGAGGAGAGAGGGAAAGGGTGGGAGCCGCGGGGCTTAGGACGCTGGGGACAAACAC	GRCm10													chr6:37299800-37300061		FALSE	Dgki	NM_001081206.1	chr6	37299976	37300176	201	-
0.628959	0.447267	7.31126	2.56082e-06	0.00161202	5.01942	cg40752497	51786313	AAAACAATATTAACCAACAACCTCCACTATATCRACTAAATTTCATAAAC						cg	F	T	C	II	1	4	34990835	Mus musculus	mm10	aaACAaTaTTAACCAaCAaCCTCCACTaTaTCrACTaaATTTCATAaaCr	AGGTTGATTGTCATGCACTTGTCTGCATTGTCATAAAACTAGTCAAAGTTTGACTCCAAG[CG]CCTATGAAATCCAGTCGACACAGTGGAGGCTGCTGGTTAACACTGTCCTGAGACAGACGT	AGGTTGATTGTCATGCACTTGTCTGCATTGTCATAAAACTAGTCAAAGTTTGACTCCAAG[CG]CCTATGAAATCCAGTCGACACAGTGGAGGCTGCTGGTTAACACTGTCCTGAGACAGACGT	GRCm10															FALSE	Mob3b	NM_178061.5	chr4	34949073	35157484	208412	-
0.537008	-0.0357616	7.3094	2.56859e-06	0.00161202	5.01658	cg39763264	78762347	ATCCATCCCTCTCAAACAACAACAATTCAAAACACATATTTAATCTTTCC						cg	R	B	C	II	1	3	53555584	Mus musculus	mm10	TCCATCCCTCTCAaACAACAaCAaTTCAaAaCACATaTTTAaTCTTTCCr	GTTCCTCAGCAATCCATCCCTCTCAGACAACAGCAGTTCAGAGCACATGTTTAGTCTTTC[CG]CACAGGGCAGATAAGTCGTATCCAAATCATGGGAGGGCCTCACCATGAGGGAGGTTTTTT	GTTCCTCAGCAATCCATCCCTCTCAGACAACAGCAGTTCAGAGCACATGTTTAGTCTTTC[CG]CACAGGGCAGATAAGTCGTATCCAAATCATGGGAGGGCCTCACCATGAGGGAGGTTTTTT	GRCm10															FALSE	Frem2	NM_172862.3	chr3	53513937	53657355	143419	-
0.59762	-0.874141	7.30524	2.58605e-06	0.00161202	5.01023	cg36257713	46759421	TTTCTAAAAACCAAACCATTATTAACAAACTTCACTCTAACACTATAACA	17672565	TTTCTAAAAACCAAACCATTATTAACAAACTTCACTCTAACACTATAACG	A	Red	R	cg	F	T	C	I	1	19	25286137	Mus musculus	mm10	TTTCTaaAAACCAaACCATTaTTaaCAaaCTTCACTCTaACACTATaaCr	CCATGCACTGTCTTCCAGAGCAGGCAGCTAATTTCAAAGTGCCCGTCAGATTCTCAGGCA[CG]CCATAGTGTCAGAGTGAAGCCTGCCAACAATGGTCTGGTTTCCAGAAAAAGGAAAGATAA	CCATGCACTGTCTTCCAGAGCAGGCAGCTAATTTCAAAGTGCCCGTCAGATTCTCAGGCA[CG]CCATAGTGTCAGAGTGAAGCCTGCCAACAATGGTCTGGTTTCCAGAAAAAGGAAAGATAA	GRCm10															FALSE	Kank1	NM_181404.5	chr19	25237201	25434496	197296	+
0.541394	-0.866709	7.30302	2.5954e-06	0.00161202	5.00685	cg41716886	74639217	AATCATACCCTAAATAAATACAAATCTCRTTCTACTAAAATTAAAATACC						cg	R	B	C	II	1	4	150415619	Mus musculus	mm10	ATCATACCCTAaaTAAATACAAATCTCrTTCTaCTAaaATTaaaaTACCr	GCTCACAGTCCAATCATACCCTAGGTAAATACAAATCTCGTTCTGCTAGGATTGGGGTAC[CG]GCCATCACAGACCAGTTGACTGACTTGTCTACCCAGCATGCAGATCTTAACAAAAACCCC	GCTCACAGTCCAATCATACCCTAGGTAAATACAAATCTCGTTCTGCTAGGATTGGGGTAC[CG]GCCATCACAGACCAGTTGACTGACTTGTCTACCCAGCATGCAGATCTTAACAAAAACCCC	GRCm10															FALSE	Rere	NM_001085492.1	chr4	150281915	150621966	340052	+
0.615376	-1.10692	7.30205	2.5995e-06	0.00161202	5.00537	cg47741289	62712913	ACCCTAAATTATATACCACTTCTACAAAATAATAAACACCCTAAAACCCA	63789407	ACCCTAAATTATATACCGCTTCTACAAAATAATAAACGCCCTAAAACCCG	G	Grn	G	cg	F	T	C	I	1	X	74023628	Mus musculus	mm10	ACCCTaaaTTATaTaCCrCTTCTACAAAaTaATaaACrCCCTaaAaCCCr	AAGCCTGAGTCCACCACCCCACGCCGGCCTGCCGTCACCCACCGAACTGGCACCAGTCGG[CG]GGCTCCAGGGCGTCCATCACTTTGTAGAAGCGGCACATAACCCAGGGTGGCACCTCGTAC	AAGCCTGAGTCCACCACCCCACGCCGGCCTGCCGTCACCCACCGAACTGGCACCAGTCGG[CG]GGCTCCAGGGCGTCCATCACTTTGTAGAAGCGGCACATAACCCAGGGTGGCACCTCGTAC	GRCm10			chrX:74023384-74023956	chrX	74023384	74023956	572	54	337	18.9	58.9	1.09			FALSE	Irak1	NM_001177975.1	chrX	74013913	74023918	10006	-
0.43684	-0.0446834	7.30159	2.60147e-06	0.00161202	5.00465	cg41707565	42710585	TAACCCCTAAATTTTCAACATCATTCAACATAATAAAAAACACAAATACA	40716249	TAACCCCTAAATTTTCAACGTCATTCAACATAATAAAAAACACAAATACG	T	Red	R	cg	R	B	C	I	1	4	149783331	Mus musculus	mm10	TaACCCCTaAaTTTTCAACrTCATTCAACATAATAaaAAACACAAaTACr	CACTCCTTTGGGTGACCCCTGAGTTTTCAACGTCATTCAACATAATAGGAAACACAAGTA[CG]GACTCTTAAACTTGACTTTATTCTAGAGGTAATTTCCTTCTAAGAAACAATCCGAACAGG	CACTCCTTTGGGTGACCCCTGAGTTTTCAACGTCATTCAACATAATAGGAAACACAAGTA[CG]GACTCTTAAACTTGACTTTATTCTAGAGGTAATTTCCTTCTAAGAAACAATCCGAACAGG	GRCm10															FALSE	.	.	.	.	.	.	.
0.845807	-1.63097	7.30126	2.60287e-06	0.00161202	5.00415	cg32256256	33681461	TACAAACAAAAACTAACCACTACCTCCACACTAAAATATCAATAAAAACA	38697883	TACGAACAAAAACTAACCACTACCTCCGCACTAAAATATCAATAAAAACG	T	Red	R	cg	R	B	C	I	1	14	21984883	Mus musculus	mm10	TACraACAaAaACTaACCACTaCCTCCrCACTaaaaTATCAaTaAaaaCr	CCTTATGCCCTCTACGGACAGAGACTGACCACTGCCTCCGCACTGGGGTATCAGTGAGGG[CG]GCCCAGAGGAATTTGGAAAGAGGAAGGATCTGGGGGATGGGAGGAGCGAGGGAGGGGCAG	CCTTATGCCCTCTACGGACAGAGACTGACCACTGCCTCCGCACTGGGGTATCAGTGAGGG[CG]GCCCAGAGGAATTTGGAAAGAGGAAGGATCTGGGGGATGGGAGGAGCGAGGGAGGGGCAG	GRCm10		chr14:21984958-21988506													FALSE	Zfp503	NM_145459.3	chr14	21983961	21989601	5641	-
0.62369	0.67426	7.30089	2.60444e-06	0.00161202	5.00359	cg28605038	9653380	TATTAAAAAAACCAAAATTTCCTACAACAACCCACAACAATTTACCTCCA	49725552	TATTAAAAAAACCGAAATTTCCTACAACAACCCGCAACAATTTACCTCCG	A	Red	R	cg	F	T	C	I	1	10	69248698	Mus musculus	mm10	TATTAaAaAaaCCrAaaTTTCCTACAaCAACCCrCAACAaTTTaCCTCCr	CTTGAGTTTCCCTTCCAAACTTCTTGCCCGTGCCCGGGCACCTCCAAGGACGTGGCTGGA[CG]GAGGCAAACTGTTGCGGGTTGCTGTAGGAAACCTCGGCCTCTCTAATACAGCATCCACTG	CTTGAGTTTCCCTTCCAAACTTCTTGCCCGTGCCCGGGCACCTCCAAGGACGTGGCTGGA[CG]GAGGCAAACTGTTGCGGGTTGCTGTAGGAAACCTCGGCCTCTCTAATACAGCATCCACTG	GRCm10															FALSE	Rhobtb1	NM_001252636.1	chr10	69208551	69291791	83241	+
-1.27435	3.69748	-7.30083	2.60469e-06	0.00161202	5.0035	cg45820466	37706176	ACTAATAAATAATAACTCCAACCCCAAATCRAACTTCTAAAAACTAATAC						cg	R	B	C	II	1	8	70913269	Mus musculus	mm10	CTaaTaAATaaTaaCTCCAACCCCAAaTCrAaCTTCTaaAAaCTaaTaCr	GGCTTTACAGTGCTGGTGAATGGTGGCTCCAACCCCAAGTCGAGCTTCTGGAAGCTGGTG[CG]CCACCTGGATCGCGTGGACGCTGTCCTTGTGACCCACGCGGGTGCTGACAGCTTGCCGGG	GGCTTTACAGTGCTGGTGAATGGTGGCTCCAACCCCAAGTCGAGCTTCTGGAAGCTGGTG[CG]CCACCTGGATCGCGTGGACGCTGTCCTTGTGACCCACGCGGGTGCTGACAGCTTGCCGGG	GRCm10			chr8:70912997-70914749	chr8	70912997	70914749	1752	122	1141	13.9	65.1	0.66			FALSE	Map1s	NM_173013.3	chr8	70905973	70917529	11557	+
0.691492	1.08263	7.2982	2.61587e-06	0.00161202	4.99948	cg31797254	61768355	CAAATAAAACATTAACAATTCTACAAAACRCRCCCTAAAAATCTACTAAC						cg	R	B	C	II	1	13	73700771	Mus musculus	mm10	AaATAAaaCATTAACAaTTCTaCAaaACrCrCCCTaAaaATCTaCTaACr	GGGTGCCTCTGCAGATAAGGCATTAACAGTTCTGCAGGACGCGCCCTGAGGATCTGCTGA[CG]CCTCCTTTCGGCCCAGGTGCTTGGGTTGAGGTGCCAAAGGTTCTCTATAAAGAGCCGGAG	GGGTGCCTCTGCAGATAAGGCATTAACAGTTCTGCAGGACGCGCCCTGAGGATCTGCTGA[CG]CCTCCTTTCGGCCCAGGTGCTTGGGTTGAGGTGCCAAAGGTTCTCTATAAAGAGCCGGAG	GRCm10															FALSE	Slc6a19os	NM_027780.1	chr13	73699825	73709856	10032	+
-0.771132	-5.54695	-7.29778	2.61767e-06	0.00161202	4.99883	cg29041552	92766324	TCCCAAAAAAAATTAATTTCTATAACCRATTCCCCRACTTACTAAAAAAC						cg	F	T	C	II	1	10	117746556	Mus musculus	mm10	CCCAaaaAAaATTAaTTTCTaTaaCCrATTCCCCrACTTACTaaaAaaCr	CCCCCTTCAGAGGATTAAAACAGCTCAGCAACGTGGAGAGTAAAACTGGCGGGGAATCTG[CG]CCTCCCAGTAAGTCGGGGAATCGGCCACAGAAACTAATCTTCCCTGGGAGCCAAGGGCTT	CCCCCTTCAGAGGATTAAAACAGCTCAGCAACGTGGAGAGTAAAACTGGCGGGGAATCTG[CG]CCTCCCAGTAAGTCGGGGAATCGGCCACAGAAACTAATCTTCCCTGGGAGCCAAGGGCTT	GRCm10													chr10:117746137-117746486		FALSE	Slc35e3	NM_029875.2	chr10	117746358	117746558	201	-
0.607938	-0.0709689	7.29777	2.61771e-06	0.00161202	4.99882	cg29982703	81707335	ATCACACCTACAAAATCACCATTTATTTTCTTAACAAAACTTCAAAAAAC						cg	F	T	C	II	1	11	96596266	Mus musculus	mm10	TCACACCTACAaAATCACCATTTaTTTTCTTAACAAAaCTTCAaaaaaCr	TTGATTTTTTTCTATAGGACTTTACTCCATTAGATTAATGAAATTTCAATGAGAGCCTGG[CG]CCCCCTGAAGCTTTGTTAAGAAAACAAATGGTGATTCTGTAGGTGTGACAGCTTGCTCGG	TTGATTTTTTTCTATAGGACTTTACTCCATTAGATTAATGAAATTTCAATGAGAGCCTGG[CG]CCCCCTGAAGCTTTGTTAAGAAAACAAATGGTGATTCTGTAGGTGTGACAGCTTGCTCGG	GRCm10															FALSE	Skap1	NM_001177898.1	chr11	96464590	96759622	295033	+
0.570984	-0.356232	7.29726	2.61988e-06	0.00161202	4.99804	cg29717475	79780462	ATACRAAACTAAAATTTCTTAAACAACCTCCAAAAATCATTTCAACTACC						cg	R	B	C	II	1	11	70218101	Mus musculus	mm10	TACrAaACTAaaaTTTCTTAAACAaCCTCCAAAaaTCATTTCAaCTaCCr	AGACTGGATGAATACGAGACTAGGGTTTCTTAAACAGCCTCCAAAGGTCATTTCAGCTGC[CG]CCCTTCCTGAAGAAAGGACTCCCAAAGCAGTCTGTAGGTGTTGGTGAGCCATAGGAAGTC	AGACTGGATGAATACGAGACTAGGGTTTCTTAAACAGCCTCCAAAGGTCATTTCAGCTGC[CG]CCCTTCCTGAAGAAAGGACTCCCAAAGCAGTCTGTAGGTGTTGGTGAGCCATAGGAAGTC	GRCm10	chr11:70220439-70220681													chr11:70213813-70214761	FALSE	Slc16a13	NM_172371.3	chr11	70216791	70220994	4204	-
0.512168	-1.33402	7.29424	2.63279e-06	0.00161649	4.99343	cg33808974	8810940	ATAAACCAAAAATAATTATCTTTTAAACCCTCRAATTTAACATATACTTC						cg	R	B	C	II	1	15	100678943	Mus musculus	mm10	TaAACCAaAAATaaTTATCTTTTaAaCCCTCrAaTTTaaCATATaCTTCr	GGGTAACTCATGTGAACCAGAAATGGTTATCTTTTGAGCCCTCGAGTTTGGCATATGCTT[CG]CTCACGCACTCTTCCTAGGATAACTAAGGAGATGTGAACCGGAAAGGGTTCTCCTTTTGA	GGGTAACTCATGTGAACCAGAAATGGTTATCTTTTGAGCCCTCGAGTTTGGCATATGCTT[CG]CTCACGCACTCTTCCTAGGATAACTAAGGAGATGTGAACCGGAAAGGGTTCTCCTTTTGA	GRCm10															FALSE	Cela1	NM_033612.2	chr15	100674421	100687920	13500	-
0.62281	-1.03798	7.28586	2.66901e-06	0.00163522	4.98062	cg40257539	2730492	CTAACAACTCAACCCTACTAATCTCTTTCCTTTTTAAAATAATATAATAC						cg	R	B	C	II	1	3	121864997	Mus musculus	mm10	TaaCAACTCAaCCCTaCTaaTCTCTTTCCTTTTTAaAATAATaTAATaCr	CTCTAGATCCTCTGGCAACTCAGCCCTGCTGGTCTCTTTCCTTTTTAGAATAATGTAATG[CG]CTCTGTCGCTCCAGGTTGTTTCCAGGTGAAATTAATTACCTAGCCTGACTGCCTCTGTTG	CTCTAGATCCTCTGGCAACTCAGCCCTGCTGGTCTCTTTCCTTTTTAGAATAATGTAATG[CG]CTCTGTCGCTCCAGGTTGTTTCCAGGTGAAATTAATTACCTAGCCTGACTGCCTCTGTTG	GRCm10															FALSE	.	.	.	.	.	.	.
0.569982	-0.487064	7.28088	2.69082e-06	0.00163951	4.97299	cg45290683	91804304	TTAATAAATAACCTAACCRTTATCRCTAAAAAAAACAATTACCTCAACAC						cg	F	T	C	II	1	7	143296526	Mus musculus	mm10	TaaTAaaTaaCCTAaCCrTTaTCrCTAaaAaaAACAaTTaCCTCAaCACr	TGGACCAAAATGCACCATCATAGACCACGCGGAGGGGCGCCGCAAGGAAAGCTGCGCAGA[CG]TGCTGAGGCAACTGTTCCTCCTAGCGACAACGGCTAGGCCACCTACCAAGACCTTGGTGA	TGGACCAAAATGCACCATCATAGACCACGCGGAGGGGCGCCGCAAGGAAAGCTGCGCAGA[CG]TGCTGAGGCAACTGTTCCTCCTAGCGACAACGGCTAGGCCACCTACCAAGACCTTGGTGA	GRCm10			chr7:143296313-143296559	chr7	143296313	143296559	246	19	142	15.4	57.7	0.93	chr7:143295404-143295824		FALSE	Kcnq1	NM_008434.2	chr7	143107253	143427042	319790	+
-0.919938	-4.54714	-7.28045	2.69268e-06	0.00163951	4.97234	cg43269400	92680114	CTCCTCCTCCTCCTCTTCRTCTATTTACCTCAAATTTAAATTTTATCTAC						cg	F	T	C	II	1	6	31217640	Mus musculus	mm10	TCCTCCTCCTCCTCTTCrTCTaTTTACCTCAAaTTTaAATTTTATCTaCr	CGGGTTGAGAGCGAGTGGTTTTTTTTTTTTTTTTCAATGTCCGCATTCCAGCTAATGTTG[CG]CAGATAAAATTCAAACTTGAGGTAAACAGACGAAGAGGAGGAGGAGGAGGGGAGGGACCG	CGGGTTGAGAGCGAGTGGTTTTTTTTTTTTTTTTCAATGTCCGCATTCCAGCTAATGTTG[CG]CAGATAAAATTCAAACTTGAGGTAAACAGACGAAGAGGAGGAGGAGGAGGGGAGGGACCG	GRCm10	chr6:31220369-31220605	chr6:31217780-31217986											chr6:31216144-31216980		FALSE	Lncpint	NR_110471.1	chr6	31093562	31218474	124913	-
-0.848852	3.67119	-7.27977	2.69567e-06	0.00163951	4.9713	cg44295175	44638967	CRATATAAATACCATCCRTAAACRCCTAAAACCTCTAATAAAACAAAATC						cg	R	B	C	II	1	7	19696720	Mus musculus	mm10	raTaTaAaTaCCATCCrTaAaCrCCTaaaaCCTCTaaTaaAaCAAaaTCr	GGCGCCGAGCGCGGTGTGAGTGCCATCCGTGAGCGCCTGGGGCCTCTGGTGGAGCAAGGT[CG]CCAGCGCACTGCCAACCTAGGCGCTGGGGCCGCCCAGCCTCTGCGCGATCGCGCCCAGGC	GGCGCCGAGCGCGGTGTGAGTGCCATCCGTGAGCGCCTGGGGCCTCTGGTGGAGCAAGGT[CG]CCAGCGCACTGCCAACCTAGGCGCTGGGGCCGCCCAGCCTCTGCGCGATCGCGCCCAGGC	GRCm10			chr7:19696587-19696990	chr7	19696587	19696990	403	40	274	19.9	68	0.87			FALSE	Apoe	NM_001305819.1	chr7	19696243	19698398	2156	-
0.542213	-0.625619	7.27803	2.70337e-06	0.00163951	4.96862	cg43392445	53690935	TTCAAAATACTTTTCCTCATACTAAATATAAATCAATAATCTACTACATC						cg	F	T	C	II	1	6	48872980	Mus musculus	mm10	TCAAaATACTTTTCCTCATACTAaATATaaATCAaTaaTCTaCTaCATCr	CCCAGCCTCTTATCCTACTTACCGCAGGGATAGAATCTGCCAGGTGCAGAGTGATGTCAA[CG]ATGCAGCAGACCACTGATCCATATCTAGTATGAGGAAAAGTATCTTGAAACACAAGGAAG	CCCAGCCTCTTATCCTACTTACCGCAGGGATAGAATCTGCCAGGTGCAGAGTGATGTCAA[CG]ATGCAGCAGACCACTGATCCATATCTAGTATGAGGAAAAGTATCTTGAAACACAAGGAAG	GRCm10															FALSE	.	.	.	.	.	.	.
0.60918	-0.0565209	7.2773	2.70658e-06	0.00163951	4.96751	cg34931416	19609560	ATAAAAACCTATTAAACCTTACTCTCACTATCRCRATACAAACTTTAACC						cg	F	T	C	II	1	17	43502805	Mus musculus	mm10	TAAAAACCTATTaaACCTTaCTCTCACTaTCrCraTaCAAACTTTaACCr	CACAAAAGTGTCATTCATTCTTGTAGACTACGCGTACTAAGAGGCACAGTATCCACAGCA[CG]GTCAAAGTTTGCACCGCGACAGTGAGAGCAAGGTCCAATAGGTTTTTATGGCAAGGAGGC	CACAAAAGTGTCATTCATTCTTGTAGACTACGCGTACTAAGAGGCACAGTATCCACAGCA[CG]GTCAAAGTTTGCACCGCGACAGTGAGAGCAAGGTCCAATAGGTTTTTATGGCAAGGAGGC	GRCm10															FALSE	Mep1a	NM_008585.2	chr17	43502773	43502973	201	-
0.677959	0.750211	7.27643	2.7104e-06	0.00163951	4.96618	cg34023641	68672286	AACTAACRTCAACAAAATTATTTATCCTACCAAACRTTATCTTATTACCC						cg	F	T	C	II	1	16	24555046	Mus musculus	mm10	ACTaACrTCAaCAaAATTaTTTaTCCTACCAAaCrTTaTCTTATTaCCCr	AAGAAAACATTTAACCCTAAAGCAATGGTGCAAAAACGTAGCAACAGAAAGTCTAACGAA[CG]GGCAATAAGACAACGCTTGGTAGGACAAACAATTCTGCTGACGTCAGTTCAGCCCTTCAT	AAGAAAACATTTAACCCTAAAGCAATGGTGCAAAAACGTAGCAACAGAAAGTCTAACGAA[CG]GGCAATAAGACAACGCTTGGTAGGACAAACAATTCTGCTGACGTCAGTTCAGCCCTTCAT	GRCm10															FALSE	Lpp	NM_178665.5	chr16	24393349	24992578	599230	+
0.613401	-1.16969	7.27501	2.71673e-06	0.00163988	4.964	cg38049758	56682452	TCAAAACTTCCAAAACACACAACATTTAAAACATAATAATCATTTAATTC						cg	R	B	C	II	1	2	9919057	Mus musculus	mm10	CAaAACTTCCAaAACACACAaCATTTaaAaCATAATAATCATTTAaTTCr	TGAGAACGAAGTCAGAACTTCCAGAACACACAGCATTTGGAGCATAATAATCATTTAGTT[CG]TTGGCCCCATGAGCCTCTTCTTTCCTCCGCCCTTTAGTTGATTGTGCTTTTCTAAAATGT	TGAGAACGAAGTCAGAACTTCCAGAACACACAGCATTTGGAGCATAATAATCATTTAGTT[CG]TTGGCCCCATGAGCCTCTTCTTTCCTCCGCCCTTTAGTTGATTGTGCTTTTCTAAAATGT	GRCm10															FALSE	Taf3	NM_027748.3	chr2	9914551	10048609	134059	-
0.543197	0.916897	7.26666	2.75403e-06	0.00165889	4.9512	cg43254824	87603315	CCAAAAAAATATCCTATTACCRACAATATCACTATCTACTAACTAATAAC						cg	F	T	C	II	1	6	29859716	Mus musculus	mm10	CAAAaAaaTaTCCTATTaCCraCAATaTCACTaTCTaCTaaCTaaTAaCr	GGGCTTTAATCCCAGAGTTGCTATTGACAATGTATTTCTTCTTGCTGCTCAGCATAGTGA[CG]CTACCAGCCAGCAGACAGTGACATTGCCGGCAATAGGACACCTCTTTGGCCCAAGGACCC	GGGCTTTAATCCCAGAGTTGCTATTGACAATGTATTTCTTCTTGCTGCTCAGCATAGTGA[CG]CTACCAGCCAGCAGACAGTGACATTGCCGGCAATAGGACACCTCTTTGGCCCAAGGACCC	GRCm10															FALSE	Ahcyl2	NM_001171000.2	chr6	29768442	29912310	143869	+
0.520073	-1.56052	7.26455	2.76354e-06	0.00166112	4.94797	cg30463624	97616988	CTACCACTAAATAAAACRATTTAACCAAAAAATTCAAATTACAAAAACCC						mu	F	T	C	II	1	12	24710396	Mus musculus	mm10	TACCACTAaaTaaAaCrATTTAaCCAAaAAaTTCAAaTTACAaAaaCCCr	NNNNNNNNNNNNNNNNNNNNNNNNNNNNNNNNNNNNNNNNNNNNNNNNNNNNNNNNNNNN[NN]NNNNNNNNNNNNNNNNNNNNNNNNNNNNNNNNNNNNNNNNNNNNNNNNNNNNNNNNNNNN	AGGAGACTGTACATTTCAGAGTGTATGTTTTCCATGGCAATTTGGAAGCCATAGAAACAG[CG]GGCCTCTGTAACTTGAACTTCTTGGCTAAATCGCTCCACCTAGTGGTAGTAAAATGAGCC	GRCm10													chr12:24707882-24708702		TRUE	Rrm2	NM_009104.2	chr12	24708253	24714146	5894	+
0.560265	-1.09698	7.2586	2.79055e-06	0.00167343	4.93884	cg42036401	90655835	CTTAATTCCCTAAATATAAATTTTCTTAATTCAAACTCATTCTACAACAC						cg	R	B	C	II	1	5	35894944	Mus musculus	mm10	TTaaTTCCCTaaaTaTAaATTTTCTTaATTCAAACTCATTCTaCAaCACr	AACTGCTTTGGCTTGGTTCCCTGGGTGTAGATTTTCTTGATTCAAACTCATTCTGCAGCA[CG]CCAAGTTCTTGGGAGAGTTTCTTCCACTTGCCAGGCGCTGACTGGGAGTTACAAAGTCAA	AACTGCTTTGGCTTGGTTCCCTGGGTGTAGATTTTCTTGATTCAAACTCATTCTGCAGCA[CG]CCAAGTTCTTGGGAGAGTTTCTTCCACTTGCCAGGCGCTGACTGGGAGTTACAAAGTCAA	GRCm10													chr5:35893170-35893597		FALSE	Afap1	NM_027373.2	chr5	35893318	36003922	110605	+
0.486554	-1.14861	7.25746	2.79572e-06	0.00167343	4.9371	cg40963429	23779261	AAAAACCCAAACTCAAAATATACAATAACTTAAACACCAACTTCAAAACC						cg	F	T	C	II	1	4	62434368	Mus musculus	mm10	AAAACCCAaaCTCAaAATaTACAaTaACTTaaaCACCAaCTTCAaAaCCr	TTGGTGTGAACTCTGACCTAGGAGGCAGGCTTCTGGGTCAATTTTCAAGCTCGGCCTCTC[CG]GCTCTGAAGCTGGTGCCCAAGTCACTGTACATTCTGAGCCTGGGTTTTCCCACCTAGCTT	TTGGTGTGAACTCTGACCTAGGAGGCAGGCTTCTGGGTCAATTTTCAAGCTCGGCCTCTC[CG]GCTCTGAAGCTGGTGCCCAAGTCACTGTACATTCTGAGCCTGGGTTTTCCCACCTAGCTT	GRCm10															FALSE	Rnf183	NM_153504.3	chr4	62427541	62434726	7186	-
0.894841	-1.22091	7.25255	2.8183e-06	0.00168136	4.92956	cg42055355	70800239	CAAAAATTTTACTAATTAATAATTAACACAACTACTCTATTCTAAACACA	66773150	CAAAAATTTTACTAATTAATAATTAACGCAACTACTCTATTCTAAACACG	A	Red	R	cg	R	B	C	I	1	5	37651028	Mus musculus	mm10	CAaaAaTTTTaCTAaTTAATaaTTAACrCAaCTACTCTATTCTAAaCACr	TGGGTTAAAGAGCAGGAGTTTTGCTAGTTAATGGTTAACGCAGCTACTCTATTCTAAGCA[CG]TCGGGTATTTGACAGCTCGCTGGAGTCTGACTTTGGCTTGGCATAGTTTAATATACAAGG	TGGGTTAAAGAGCAGGAGTTTTGCTAGTTAATGGTTAACGCAGCTACTCTATTCTAAGCA[CG]TCGGGTATTTGACAGCTCGCTGGAGTCTGACTTTGGCTTGGCATAGTTTAATATACAAGG	GRCm10															FALSE	Stk32b	NM_022416.2	chr5	37446824	37717153	270330	-
0.59544	-0.98366	7.25202	2.82072e-06	0.00168136	4.92875	cg37123602	66805294	RATCAATAAAACTATACACRTTCAATAAATCAACCCRTTCCTTAAAAACC						cg	F	T	C	II	1	1	78440861	Mus musculus	mm10	ATCAaTAAaaCTATaCACrTTCAaTAAaTCAaCCCrTTCCTTaaaAaCCr	TAGAACCTGGTCTTGCCCTTTGGAAGAGAGATCTGGAAATTCATTTGGTTGATCATCACC[CG]GCTCCCAAGGAACGGGCTGACTTACTGAACGTGCATAGCCTTACTGATCGAGTAGTAGCA	TAGAACCTGGTCTTGCCCTTTGGAAGAGAGATCTGGAAATTCATTTGGTTGATCATCACC[CG]GCTCCCAAGGAACGGGCTGACTTACTGAACGTGCATAGCCTTACTGATCGAGTAGTAGCA	GRCm10															FALSE	Farsb	NM_001278075.1	chr1	78417957	78488897	70941	-
0.563297	-0.17743	7.24935	2.83309e-06	0.00168248	4.92464	cg40257613	64767459	ATTACTCCCTATATAACTAACTACCTATAACAAATTTTCTTTAAAATAAC						cg	F	T	C	II	1	3	121875184	Mus musculus	mm10	TTACTCCCTaTaTAACTaACTaCCTATaACAaaTTTTCTTTAaAATaACr	ACAACAATTAGAGAAGAGGCTGCAGGGACTCTGATCGGGTTTGGTCAGGAGAGCAATAGA[CG]TCATTCTAAAGAAAACCTGTCATAGGCAGTCAGTTACACAGGGAGTAACTTGGGGCAACA	ACAACAATTAGAGAAGAGGCTGCAGGGACTCTGATCGGGTTTGGTCAGGAGAGCAATAGA[CG]TCATTCTAAAGAAAACCTGTCATAGGCAGTCAGTTACACAGGGAGTAACTTGGGGCAACA	GRCm10															FALSE	.	.	.	.	.	.	.
0.472849	-1.2375	7.24907	2.83436e-06	0.00168248	4.92422	cg41673669	9783366	AATAACTTACTAAAAAACTCACTTAAAAAACCRATCCTAATTAAAAAACC						cg	F	T	C	II	1	4	147124819	Mus musculus	mm10	aTAaCTTACTAaAAAaCTCACTTaAaaAACCrATCCTaATTAAaaaaCCr	GGCCACTCGGGTGCGGCACGGAGGGCGGGGTCGGAACCGCTAGTGCCCAGGACCCGCCTC[CG]GCCCCTTAATCAGGATCGGTTCCTCAAGTGAGCTTTCTAGTAAGCTACCTGAGTTGGCTA	GGCCACTCGGGTGCGGCACGGAGGGCGGGGTCGGAACCGCTAGTGCCCAGGACCCGCCTC[CG]GCCCCTTAATCAGGATCGGTTCCTCAAGTGAGCTTTCTAGTAAGCTACCTGAGTTGGCTA	GRCm10			chr4:147124818-147125246	chr4	147124818	147125246	428	40	303	18.7	70.8	0.75			FALSE	.	.	.	.	.	.	.
0.802402	1.64805	7.2467	2.84539e-06	0.00168268	4.92058	cg38751653	45780369	ACCTTATCCAATAATCAAACACTTTACTCCTATATATAAAATTCTAAACC						cg	F	T	C	II	1	2	103477846	Mus musculus	mm10	CCTTATCCAATAaTCAAaCACTTTACTCCTaTaTaTaAaaTTCTaaaCCr	AACCTTTTTCGCACGGTGGGACTATGATCTTCACTACTATTATTGACAAGGTTAGGGATC[CG]GCCCAGAACCTCACACACAGGAGTAAAGTGCTTGACTATTGGATAAGGCCTGCTTCTACT	AACCTTTTTCGCACGGTGGGACTATGATCTTCACTACTATTATTGACAAGGTTAGGGATC[CG]GCCCAGAACCTCACACACAGGAGTAAAGTGCTTGACTATTGGATAAGGCCTGCTTCTACT	GRCm10															FALSE	Cat	NM_009804.2	chr2	103453903	103485153	31251	-
0.716591	-0.445454	7.24568	2.85011e-06	0.00168268	4.91902	cg30399311	15691855	TAAACATATAACTTTTCTACTACCCAAACAATTAACATAAACCATTTAAC						cg	F	T	C	II	1	12	16221435	Mus musculus	mm10	AAACATATaACTTTTCTACTACCCAAaCAaTTaaCATaAACCATTTaACr	CCTTTCCAACAACTTCATTCCTGAAGCTGTGAGGGGAAATGCCCTCCTTTCTGCCTACAT[CG]TCAAATGGTTCATGCCAACTGCTTGGGTAGTAGAAAAGTCATATGTTTAGTTGGACCTGA	CCTTTCCAACAACTTCATTCCTGAAGCTGTGAGGGGAAATGCCCTCCTTTCTGCCTACAT[CG]TCAAATGGTTCATGCCAACTGCTTGGGTAGTAGAAAAGTCATATGTTTAGTTGGACCTGA	GRCm10															FALSE	.	.	.	.	.	.	.
0.487077	-0.331868	7.24521	2.85234e-06	0.00168268	4.91829	cg46231802	45694952	CCTACCACTAATAAATATTCCRAAAACAACTATCRCCTAAAAAATAATCC						cg	F	T	C	II	1	8	117314754	Mus musculus	mm10	CTACCACTAaTAaaTaTTCCraAAACAaCTaTCrCCTaAAAaATaATCCr	GCCAGCCTCCTGGAGAGTCTCCGCAAGCAGAGAGGCATCCAATCTGGCCAGGTGGTGGGA[CG]GATCATCTTTCAGGCGACAGCTGTTTCCGGAACACCTACTAGTGGTAGGGCTCGAGCCAG	GCCAGCCTCCTGGAGAGTCTCCGCAAGCAGAGAGGCATCCAATCTGGCCAGGTGGTGGGA[CG]GATCATCTTTCAGGCGACAGCTGTTTCCGGAACACCTACTAGTGGTAGGGCTCGAGCCAG	GRCm10															FALSE	Cmip	NM_001163262.1	chr8	117257018	117461506	204489	+
0.738049	-1.03208	7.24131	2.87059e-06	0.00168996	4.9123	cg29775864	47771388	TCCCAAATATTAACACACTATATATCACTAACCCATTATTCCTTATAACA	90786944	TCCCAAATATTAACACACTATATATCACTAACCCATTATTCCTTATAACG	A	Red	R	cg	F	T	C	I	1	11	76244506	Mus musculus	mm10	TCCCAaATATTaaCACACTaTATATCACTaACCCATTATTCCTTaTaaCr	AAGACGTCAGCCTCATTAAGGTGAAATTTGAGGACATCAAGGATTGGTCAGACCTAGTAA[CG]CCACAAGGAATAATGGGTCAGTGATATACAGTGTGCCAATATCTGGGATTTCTATTTCAT	AAGACGTCAGCCTCATTAAGGTGAAATTTGAGGACATCAAGGATTGGTCAGACCTAGTAA[CG]CCACAAGGAATAATGGGTCAGTGATATACAGTGTGCCAATATCTGGGATTTCTATTTCAT	GRCm10													chr11:76243391-76243955		FALSE	Rnmtl1	NM_183263.5	chr11	76243735	76250622	6888	+
0.701243	-3.05625	7.23785	2.88691e-06	0.00169577	4.90698	cg36068729	26734299	CAAACAAATATAAACAAAATCACRAAACCCAAAAACTAAATACAACCCTC						cg	R	B	C	II	1	19	3681556	Mus musculus	mm10	AAaCAAATaTaAaCAaAaTCACrAAaCCCAaAAaCTaaaTaCAaCCCTCr	GTGAGGCTTTCCAAGCAAATGTGAGCAGAGTCACGAAGCCCAGAAGCTGGGTGCAGCCCT[CG]GCTCCCACCACGCCTGCCCCACAGACTCCTGTTTCTAGAGGCTAAGAAGTGATCCAGCTT	GTGAGGCTTTCCAAGCAAATGTGAGCAGAGTCACGAAGCCCAGAAGCTGGGTGCAGCCCT[CG]GCTCCCACCACGCCTGCCCCACAGACTCCTGTTTCTAGAGGCTAAGAAGTGATCCAGCTT	GRCm10															FALSE	Lrp5	NM_008513.3	chr19	3584824	3686564	101741	-
0.715573	1.60391	7.23571	2.89703e-06	0.00169577	4.90369	cg32293556	61809271	TAATTCCAAAAAATAACRCCRAAAAATAACACTTTAAACCTCAAAAAAAC						cg	R	B	C	II	1	14	26619330	Mus musculus	mm10	AaTTCCAAAAAATAaCrCCraAaAATAACACTTTaaaCCTCAaAAaaACr	AAACTTTGTGTTAGTTCCAAAAAATAGCGCCGGAGAATAACACTTTGGGCCTCAGAAGGA[CG]CTTCTGCTGTATACCCTTGCAAGAAGAAAATGGAAATCCATATTTTAGTGTCAGGAAATG	AAACTTTGTGTTAGTTCCAAAAAATAGCGCCGGAGAATAACACTTTGGGCCTCAGAAGGA[CG]CTTCTGCTGTATACCCTTGCAAGAAGAAAATGGAAATCCATATTTTAGTGTCAGGAAATG	GRCm10															FALSE	Dennd6a	NM_001285466.1	chr14	26573857	26634322	60466	+
0.616858	0.512916	7.23546	2.89823e-06	0.00169577	4.90331	cg35984018	31768305	TTCAAACAAACTACCCAATATAACCCAATTTAACTCACTATTTAACTTAC						cg	R	B	C	II	1	18	80258943	Mus musculus	mm10	TCAaaCAaaCTaCCCAaTaTAaCCCAaTTTAACTCACTaTTTAACTTACr	GGACCTTTGATTTCAGGCAGGCTGCCCAGTGTAGCCCAGTTTAACTCACTGTTTAACTTA[CG]TAGGGGCAGGATATTTACTTTCAGGATTGAGGAATACATTTTCTCCAAGTCCTGAAGTAG	GGACCTTTGATTTCAGGCAGGCTGCCCAGTGTAGCCCAGTTTAACTCACTGTTTAACTTA[CG]TAGGGGCAGGATATTTACTTTCAGGATTGAGGAATACATTTTCTCCAAGTCCTGAAGTAG	GRCm10														chr18:80256045-80256924	FALSE	Pqlc1	NM_001164420.1	chr18	80255244	80292724	37481	+
0.503478	-0.174465	7.22478	2.94941e-06	0.00171928	4.88687	cg40367579	60772194	AAAAATAATAACTAATCAAAAACACCAAAATAAACCCCAACTTTCCACTC						cg	R	B	C	II	1	3	135285322	Mus musculus	mm10	aAaaTaATaaCTaaTCAaaaACACCAAaaTaaACCCCAaCTTTCCACTCr	GCACAGCCCATGGAGGTGATGGCTGGTCAGGGACACCAAGGTGGACCCCAGCTTTCCACT[CG]GTCGCATCCTAATGCTGAGACGGGGAGAGGAGGTGTCCCTCTCCCTCACTGCCTGACCTC	GCACAGCCCATGGAGGTGATGGCTGGTCAGGGACACCAAGGTGGACCCCAGCTTTCCACT[CG]GTCGCATCCTAATGCTGAGACGGGGAGAGGAGGTGTCCCTCTCCCTCACTGCCTGACCTC	GRCm10															FALSE	Bdh2	NM_027208.2	chr3	135281220	135304426	23207	+
0.812394	0.88892	7.22298	2.95812e-06	0.00171928	4.8841	cg29251906	75788588	ATTTAAATTCTTCACAAATCCACTCTATTATCRAAATTATCCAACTCTAC						cg	F	T	C	II	1	11	11898070	Mus musculus	mm10	TTTaaATTCTTCACAaaTCCACTCTaTTaTCraaATTaTCCAaCTCTaCr	GATGAGAGTAAGTTGCCCAAGCACCAAGTTCACAGTTGTGTCGCCACCTCCTCTTCAGTT[CG]CAGAGCTGGACAATCCCGACAACAGAGTGGACCTGTGAAGAATCCAAATTCCAAGCAAGT	GATGAGAGTAAGTTGCCCAAGCACCAAGTTCACAGTTGTGTCGCCACCTCCTCTTCAGTT[CG]CAGAGCTGGACAATCCCGACAACAGAGTGGACCTGTGAAGAATCCAAATTCCAAGCAAGT	GRCm10															FALSE	Ddc	NM_001190448.1	chr11	11814100	11898144	84045	-
1.07042	3.20427	7.22228	2.96153e-06	0.00171928	4.88302	cg42833478	97759555	CCCTCRTTATCCTACTCAATTCACTCACATAATAAATTTATTATAATAAC						cg	R	B	C	II	1	5	129772443	Mus musculus	mm10	CCTCrTTaTCCTaCTCAaTTCACTCACATaATaaATTTaTTaTaaTAACr	TGGCTCGCTTTCCCTCGTTGTCCTGCTCAGTTCACTCACATGATGGATTTGTTGTGGTAA[CG]TGTGAGTGTGGGGGTCAGAGGAACTTTTTGTGATTCTTCTGTTAACCTCCACCATGTGGT	TGGCTCGCTTTCCCTCGTTGTCCTGCTCAGTTCACTCACATGATGGATTTGTTGTGGTAA[CG]TGTGAGTGTGGGGGTCAGAGGAACTTTTTGTGATTCTTCTGTTAACCTCCACCATGTGGT	GRCm10															FALSE	Psph	NM_133900.4	chr5	129765557	129787253	21697	-
0.546195	-0.191828	7.22086	2.96841e-06	0.00171928	4.88084	cg43304655	47637406	RCTAATCCAAAATCTAAACAAAATCCACCATACTCCTTAATAAACAAACC						cg	F	T	C	II	1	6	35303521	Mus musculus	mm10	CTaaTCCAaaATCTaAaCAAaaTCCACCATaCTCCTTaATaaaCAAaCCr	CCAAGCCAGCTGTTATTCTGTCAATGTTTACATAGGGAGCAGGTTTGGCCCGGCTCCAGT[CG]GCTTGCCCATCAAGGAGCATGGTGGACCTTGCTCAGATCCTGGACCAGCGAGCGGCAGTA	CCAAGCCAGCTGTTATTCTGTCAATGTTTACATAGGGAGCAGGTTTGGCCCGGCTCCAGT[CG]GCTTGCCCATCAAGGAGCATGGTGGACCTTGCTCAGATCCTGGACCAGCGAGCGGCAGTA	GRCm10															FALSE	Slc13a4	NM_172892.3	chr6	35267952	35308126	40175	-
-0.685077	-5.71339	-7.22062	2.9696e-06	0.00171928	4.88046	cg36682671	76801869	AAAAAACATATACCACAACAAACCATACAAATATCCACAAAAACAAAACA	51712182	AAAAAACGTATACCGCGACGAACCGTACAAATATCCGCAAAAACAAAACG	T	Red	R	cg	R	B	C	I	1	1	16518988	Mus musculus	mm10	aaaaaaCrTaTaCCrCraCrAaCCrTACAaaTaTCCrCAaaaaCAaaaCr	GGGGGAGGGGAGGGGGGGCGTGTGCCGCGGCGAGCCGTACAGGTGTCCGCAGGGGCAGGG[CG]GGGCGGGGGCGCCGGGCGCGACGGCGGGGGGCGCGGAGGTCACCCGGGCCTTGCAGGGGC	GGGGGAGGGGAGGGGGGGCGTGTGCCGCGGCGAGCCGTACAGGTGTCCGCAGGGGCAGGG[CG]GGGCGGGGGCGCCGGGCGCGACGGCGGGGGGCGCGGAGGTCACCCGGGCCTTGCAGGGGC	GRCm10		chr1:16519743-16520093													FALSE	Stau2	NM_025303.3	chr1	16228809	16519302	290494	-
0.520134	0.775716	7.21962	2.97448e-06	0.00171928	4.87892	cg29905812	91664846	ACTCTCTACAAAACTTTTTCCACTTAAAAACCAACCTTAAAAATAATTCC						cg	F	T	C	II	1	11	88586656	Mus musculus	mm10	CTCTCTACAaaACTTTTTCCACTTAAAaACCAaCCTTaaAAATAATTCCr	AAACTTTATAAAAACAAACAAAGAGCCAGATTTGGCCTGTGTGTCTCATTGACCCCTGAA[CG]GAATTATTTCCAAGGCTGGTCTTTAAGTGGAAAAAGTCCTGTAGAGAGTGTTTAAATAGA	AAACTTTATAAAAACAAACAAAGAGCCAGATTTGGCCTGTGTGTCTCATTGACCCCTGAA[CG]GAATTATTTCCAAGGCTGGTCTTTAAGTGGAAAAAGTCCTGTAGAGAGTGTTTAAATAGA	GRCm10															FALSE	Msi2	NM_054043.3	chr11	88339381	88718229	378849	-
0.681755	0.693699	7.21749	2.98485e-06	0.0017218	4.87565	cg33066766	68763924	AAAAAATTTAACTACATTTCCAAAATCACACTACTTTAAAACAACAAACC						cg	F	T	C	II	1	15	10224197	Mus musculus	mm10	AAAAaTTTAaCTACATTTCCAAaaTCACACTaCTTTAaaACAACAaACCr	CACTGATGCTCAGGGAGACTTGTGACTTGAGCTGGAAAATACTGCTCTGGGAGGGAAGAA[CG]GTCTGTTGTCCTAAAGCAGTGTGACCTTGGAAATGTAGCTAAACTTTTCTGGACTCGATG	CACTGATGCTCAGGGAGACTTGTGACTTGAGCTGGAAAATACTGCTCTGGGAGGGAAGAA[CG]GTCTGTTGTCCTAAAGCAGTGTGACCTTGGAAATGTAGCTAAACTTTTCTGGACTCGATG	GRCm10															FALSE	Prlr	NM_011169.5	chr15	10177237	10337020	159784	+
-0.67569	-4.64327	-7.20185	3.0625e-06	0.00176304	4.85153	cg40969343	5645382	AAATTACATTTTCRCAAAATCTAAATTATCCAAACTACAATAACTACTCC						cg	F	T	C	II	1	4	62965961	Mus musculus	mm10	aaTTaCATTTTCrCAAAATCTaAATTaTCCAAACTaCAATaaCTaCTCCr	CCCGCCGCCCCCCGCGGCCCCCAGCTCGGACCGGAGCCCAGAAACAAAGCGGCGAGAGCA[CG]GAGCAGCCATTGCAGTTTGGACAATTCAGATTTTGCGAAAATGCAACCTTCTTCCAGATC	CCCGCCGCCCCCCGCGGCCCCCAGCTCGGACCGGAGCCCAGAAACAAAGCGGCGAGAGCA[CG]GAGCAGCCATTGCAGTTTGGACAATTCAGATTTTGCGAAAATGCAACCTTCTTCCAGATC	GRCm10															FALSE	Zfp618	NM_028326.1	chr4	62965573	63134030	168458	+
0.54842	-1.04832	7.1994	3.07483e-06	0.00176658	4.84776	cg29476370	51755154	ACTCTCACATAACTTCTCAATTTCCTAATCTACTAAATACAAATAACAAC						cg	R	B	C	II	1	11	45838955	Mus musculus	mm10	CTCTCACATAaCTTCTCAATTTCCTaaTCTaCTAAATaCAaaTAACAACr	CCAGTCACCTGGCTCTCACATAGCTTCTCAATTTCCTGGTCTGCTAAATGCAGGTAACAA[CG]CCAACTCTAATCACTATTCAGAATTATTAGAATGTAACTGGGGAGTGAGTGTGTGTAAGT	CCAGTCACCTGGCTCTCACATAGCTTCTCAATTTCCTGGTCTGCTAAATGCAGGTAACAA[CG]CCAACTCTAATCACTATTCAGAATTATTAGAATGTAACTGGGGAGTGAGTGTGTGTAAGT	GRCm10															FALSE	F630206G17Rik	NR_045876.1	chr11	45808082	45842880	34799	+
0.498976	1.24204	7.19446	3.09989e-06	0.00177741	4.84013	cg29635055	53672207	TAAACTTATAAAACTTCTACATTCCAAATCTACCTATTCTTACCTCTACC						cg	F	T	C	II	1	11	62367050	Mus musculus	mm10	aaaCTTaTAaAaCTTCTaCATTCCAAaTCTACCTaTTCTTaCCTCTaCCr	TATGCTCTTTACCAACGGCACATTAAGGCCATGCATGAGTCAGCACTCCTGGAGGAGCAG[CG]GCAGAGGCAAGAACAGGTAGACTTGGAATGCAGAAGCTCTACAAGCCCATGCAGCACTTC	TATGCTCTTTACCAACGGCACATTAAGGCCATGCATGAGTCAGCACTCCTGGAGGAGCAG[CG]GCAGAGGCAAGAACAGGTAGACTTGGAATGCAGAAGCTCTACAAGCCCATGCAGCACTTC	GRCm10															FALSE	Ncor1	NM_011308.3	chr11	62316425	62438515	122091	-
0.550851	-1.12173	7.19014	3.12197e-06	0.00177765	4.83346	cg38818058	47687917	ACAAAAAATCTAAAATACTTATCCRAAAACCCTAAACTACTCAAAAATCC						cg	F	T	C	II	1	2	113538454	Mus musculus	mm10	CAaAaaATCTAAAaTaCTTaTCCraaaaCCCTaaaCTaCTCAaaaaTCCr	CGTGAGTCATGCTTGTTTCCAGCTGGATTCCTTACCTGCCAGGGCCTTCCAAGTGAGTGT[CG]GACCCCTGAGCAGCCCAGGGCCCCCGGACAAGCACTTTAGATCCTCTGCACTGGAAAGAA	CGTGAGTCATGCTTGTTTCCAGCTGGATTCCTTACCTGCCAGGGCCTTCCAAGTGAGTGT[CG]GACCCCTGAGCAGCCCAGGGCCCCCGGACAAGCACTTTAGATCCTCTGCACTGGAAAGAA	GRCm10															FALSE	Fmn1	NM_001285458.1	chr2	113327735	113716767	389033	+
0.663963	1.11817	7.19	3.12269e-06	0.00177765	4.83325	cg28370008	47702492	AACACAACATAAAAACAACCRATAAAAATCTTATACCRTACTAAATAAAC						cg	R	B	C	II	1	10	39630194	Mus musculus	mm10	aCACAACATaAaAACAaCCrATaaAAATCTTaTACCrTaCTAAATaAaCr	GGTGGGTGCTGAGCACAACATGAGAACAGCCGATGGAAATCTTGTACCGTGCTAAATGAG[CG]CCCAGCACCGCCTGTTGTTTGTCAGTCTCGTGAGCCGCTTGGCTCCAGTACAGACAGTCT	GGTGGGTGCTGAGCACAACATGAGAACAGCCGATGGAAATCTTGTACCGTGCTAAATGAG[CG]CCCAGCACCGCCTGTTGTTTGTCAGTCTCGTGAGCCGCTTGGCTCCAGTACAGACAGTCT	GRCm10															FALSE	Traf3ip2	NM_134000.3	chr10	39612933	39655307	42375	+
-1.41591	-4.89545	-7.18961	3.12469e-06	0.00177765	4.83264	cg34576457	68777966	AACTACRACRACTACRACTACTAAAACTAATTTAACTACTACTATAATAC						cg	F	T	C	II	1	17	4995241	Mus musculus	mm10	aCTaCraCraCTaCraCTaCTaaAACTaaTTTAaCTaCTaCTaTAaTaCr	CCATGCCCACCACCACCACCACCACCATGCCCACCACCTCCACCACCTCCACCACCACCA[CG]CACTACAGCAGCAGCTAAACCAGTTCCAGCAGCCGCAGCCGCCGCAGCCACAGCAGCAGC	CCATGCCCACCACCACCACCACCACCATGCCCACCACCTCCACCACCTCCACCACCACCA[CG]CACTACAGCAGCAGCTAAACCAGTTCCAGCAGCCGCAGCCGCCGCAGCCACAGCAGCAGC	GRCm10			chr17:4994039-4996845	chr17	4994039	4996845	2806	224	1420	16	50.6	1.25			FALSE	Arid1b	NM_001085355.1	chr17	4995073	5347656	352584	+
0.819235	1.8315	7.18952	3.12517e-06	0.00177765	4.8325	cg44206516	89620494	AACAATTATTCTTTAACCAAAAACACATTACTAATACACAACTAAAATCA	42735279	AACAATTATTCTTTAACCGAAAACACATTACTAATACGCAACTAAAATCG	T	Red	R	cg	R	B	C	I	1	7	6174060	Mus musculus	mm10	AaCAaTTaTTCTTTaACCrAaaACACATTaCTaaTACrCAaCTaaAATCr	GTCTTTGAAAGGAGCAGTTGTTCTTTGACCGAGGACACATTGCTGGTACGCAGCTGGAAT[CG]GTTCCAATTCCGAAGCCCTTGTCCTCTGAGTAAATATTTGGTGAGTTGTGCAGCTCAGGG	GTCTTTGAAAGGAGCAGTTGTTCTTTGACCGAGGACACATTGCTGGTACGCAGCTGGAAT[CG]GTTCCAATTCCGAAGCCCTTGTCCTCTGAGTAAATATTTGGTGAGTTGTGCAGCTCAGGG	GRCm10													chr7:6172892-6173097		FALSE	Zfp444	NM_028316.3	chr7	6172512	6193104	20593	+
0.530338	-1.4713	7.18341	3.15674e-06	0.00178993	4.82306	cg39368495	26640348	ATTCAATCATTATCTCCCTAAAATTTATTATATTAAATCAATTCCAAACC						cg	F	T	C	II	1	2	173152944	Mus musculus	mm10	TTCAATCATTATCTCCCTaaAaTTTATTaTaTTAAaTCAaTTCCAAACCr	GACCCGGAGGCTCGCCTCTGACGTAAGGGGCAGGCCTTTGGATCATAGCCATGGTCAGCA[CG]GTTTGGAACTGACTTAACACAATAAACTCCAGGGAGATAATGATTGAACTTGTGGTTGTT	GACCCGGAGGCTCGCCTCTGACGTAAGGGGCAGGCCTTTGGATCATAGCCATGGTCAGCA[CG]GTTTGGAACTGACTTAACACAATAAACTCCAGGGAGATAATGATTGAACTTGTGGTTGTT	GRCm10															FALSE	Pck1	NM_011044.2	chr2	173152872	173153072	201	+
0.577104	1.21076	7.18136	3.16741e-06	0.00178993	4.81989	cg29845732	75609204	RCCACCATAACCTATCATATAATAAAATCTTAACTAAAATCAAAACCAAC						cg	F	T	C	II	1	11	82886886	Mus musculus	mm10	CCACCATAACCTATCATaTaATaaaaTCTTAACTaaAaTCAAAACCAaCr	GGACCCAAGAGTGAGTATTTCTTTTTTTACACTTAGCAGATGGTCATAGGAAAAGTGAAT[CG]CTGGTTTTGACTCCAGTTAAGACCCCATCACATGATAGGTTATGGTGGCGCACGCCTTTA	GGACCCAAGAGTGAGTATTTCTTTTTTTACACTTAGCAGATGGTCATAGGAAAAGTGAAT[CG]CTGGTTTTGACTCCAGTTAAGACCCCATCACATGATAGGTTATGGTGGCGCACGCCTTTA	GRCm10	chr11:82890524-82890733														FALSE	Rad51d	NM_001277939.1	chr11	82871959	82890624	18666	-
0.58433	-0.698842	7.18083	3.17018e-06	0.00178993	4.81907	cg29031068	27626470	ACTAAAATACTTTCTAACCCTTCCAAAACAATTACTCCTTAACTCTATAC						cg	R	B	C	II	1	10	116966253	Mus musculus	mm10	CTAaaaTaCTTTCTaaCCCTTCCAaaaCAATTaCTCCTTAaCTCTaTACr	GCATATTGGCAGCTAGGGTGCTTTCTGGCCCTTCCAGGGCAATTGCTCCTTAGCTCTGTA[CG]CAGGCTGCTAGGAGCCAACTGGCCTCCACCCCATCAGTCTATGCCTCCACTCACGAGGCA	GCATATTGGCAGCTAGGGTGCTTTCTGGCCCTTCCAGGGCAATTGCTCCTTAGCTCTGTA[CG]CAGGCTGCTAGGAGCCAACTGGCCTCCACCCCATCAGTCTATGCCTCCACTCACGAGGCA	GRCm10															FALSE	D630029K05Rik	NR_027847.1	chr10	116964739	116969108	4370	+
0.53383	-0.694896	7.18	3.17449e-06	0.00178993	4.81779	cg38425439	60770894	ACCCTATAAATCACCTATTATACCACCCAATAAATATATAATCAATCCAC						cg	R	B	C	II	1	2	59169996	Mus musculus	mm10	CCCTaTAAATCACCTATTaTaCCACCCAaTAaaTATATAaTCAaTCCACr	TAGACTCATTAACCCTGTAAATCACCTATTGTGCCACCCAGTAGGTATATAGTCAGTCCA[CG]GCAAAGGGATCTTTTCCCCAAACTACTTAGCAGCAGGGATCCAGGTCTTTCCATGAGTGG	TAGACTCATTAACCCTGTAAATCACCTATTGTGCCACCCAGTAGGTATATAGTCAGTCCA[CG]GCAAAGGGATCTTTTCCCCAAACTACTTAGCAGCAGGGATCCAGGTCTTTCCATGAGTGG	GRCm10															FALSE	Pkp4	NM_175464.2	chr2	59160849	59355205	194357	+
0.455695	-0.470638	7.17784	3.18581e-06	0.00178993	4.81444	cg33664926	76609253	CAACATTTTTAATAACCAAAACTTAACAACAACTCAAACAAACATCAACC						cg	F	T	C	II	1	15	88801010	Mus musculus	mm10	AACATTTTTAATAaCCAaAACTTaaCAACAACTCAaACAaACATCAaCCr	TTCCTTTTGTCTCTGAGATAGCTTCACACTGAATGGGGCGTACCCCAGTCCGCTGGTCCA[CG]GCTGATGTCTGTCTGAGTTGTTGCCAAGTTCTGGCTATTAAAAATGTTGATGCGAGGGCT	TTCCTTTTGTCTCTGAGATAGCTTCACACTGAATGGGGCGTACCCCAGTCCGCTGGTCCA[CG]GCTGATGTCTGTCTGAGTTGTTGCCAAGTTCTGGCTATTAAAAATGTTGATGCGAGGGCT	GRCm10															FALSE	.	.	.	.	.	.	.
0.474133	-0.305895	7.17718	3.18923e-06	0.00178993	4.81343	cg45169990	21656125	AATATTTACCAAACTCTACTCAAAAAAAACATTTCCACTACCATAATACA	58608159	AATATTTACCAAACTCTACTCAAAAAAAACGTTTCCACTACCATAATACG	A	Red	R	cg	F	T	C	I	1	7	130960138	Mus musculus	mm10	aATaTTTaCCAaACTCTaCTCAaaAaaAACrTTTCCACTaCCATAaTaCr	GTTCCTAGGGAGTTGTGATGAATAGGCGCGTCCCCCTGAACACCCAAATGAAAGACAGAA[CG]CACTATGGCAGTGGAAACGTTCCTCCTGAGCAGAGTCTGGCAAACATCACTGAGAGACAG	GTTCCTAGGGAGTTGTGATGAATAGGCGCGTCCCCCTGAACACCCAAATGAAAGACAGAA[CG]CACTATGGCAGTGGAAACGTTCCTCCTGAGCAGAGTCTGGCAAACATCACTGAGAGACAG	GRCm10															FALSE	Htra1	NM_019564.3	chr7	130936202	130985658	49457	+
0.914462	1.85636	7.17694	3.19053e-06	0.00178993	4.81305	cg38547744	4792505	TTCCTACATCTAAATATTAAATAACCTTAATACACTCCTATTAAACACCC						cg	F	T	C	II	1	2	73557462	Mus musculus	mm10	TCCTaCATCTAAaTaTTaAaTaaCCTTaaTACACTCCTaTTaaACACCCr	AGAGACCTCAAATAGTCAGGTTTCCAGGGAAGACGCGTGAATTATCATGGTGCTGACTGA[CG]GGTGTCCAACAGGAGTGTACCAAGGCCACTCAACACTTAGATGCAGGAAAGACAGTACAA	AGAGACCTCAAATAGTCAGGTTTCCAGGGAAGACGCGTGAATTATCATGGTGCTGACTGA[CG]GGTGTCCAACAGGAGTGTACCAAGGCCACTCAACACTTAGATGCAGGAAAGACAGTACAA	GRCm10															FALSE	.	.	.	.	.	.	.
-0.739638	0.78577	-7.17417	3.20511e-06	0.00179459	4.80877	cg43947179	61722964	CCACTAAATCAATACTAAACTCAATAATACCAACCTCRTACTAACTAAAC						cg	R	B	C	II	1	6	122626667	Mus musculus	mm10	CACTaAaTCAaTaCTaaaCTCAaTaATACCAaCCTCrTaCTAaCTaAACr	TCCCTGGTCCTCCACTGAGTCAGTGCTGGGCTCAGTGATACCAGCCTCGTGCTAGCTGAA[CG]AGAAGAGAAGGGAGGGCTTCCCAAAACCCCGGGCAGAAAGGCCGACGCCGGCCTACCTGT	TCCCTGGTCCTCCACTGAGTCAGTGCTGGGCTCAGTGATACCAGCCTCGTGCTAGCTGAA[CG]AGAAGAGAAGGGAGGGCTTCCCAAAACCCCGGGCAGAAAGGCCGACGCCGGCCTACCTGT	GRCm10															FALSE	Dppa3	NM_139218.1	chr6	122626423	122630271	3849	+
0.462665	-1.63716	7.17067	3.22364e-06	0.00180143	4.80335	cg45804647	39715448	CAAAACTATACTATCAAATTCTACCTAACTTCAATTCAACAACCTAAAAC						cg	F	T	C	II	1	8	69954442	Mus musculus	mm10	AAaACTaTaCTATCAaATTCTaCCTaaCTTCAATTCAaCAACCTAaAaCr	AACTCCTCCATCCTAGCCTATTACCCAAGTCCAAACGTACAGCACTAGCTGTGTGTCACA[CG]CTCTAGGTTGCTGAATTGAAGCCAGGCAGAATCTGATAGCACAGTCTTGCCTTACTGCTT	AACTCCTCCATCCTAGCCTATTACCCAAGTCCAAACGTACAGCACTAGCTGTGTGTCACA[CG]CTCTAGGTTGCTGAATTGAAGCCAGGCAGAATCTGATAGCACAGTCTTGCCTTACTGCTT	GRCm10															FALSE	Gatad2a	NM_001113346.1	chr8	69907068	69974383	67316	-
1.38856	-4.38092	7.16747	3.24064e-06	0.00180171	4.7984	cg38379757	28734403	AAACAAAATCCTCAAAACATAAAACAAAAACATCCTATTTCTAATAACCA	3603435	AAACGAAATCCTCAAAACATAAAACAAAAACATCCTATTTCTAATAACCG	T	Red	R	cg	F	T	C	I	1	2	51973023	Mus musculus	mm10	aaACrAAaTCCTCAaaaCATaaAaCAaAAaCATCCTaTTTCTAATAACCr	AAAACACTAACCTGGCTTCAGCGACGAGCAGCGCTCAGTCCCAGGCCTTACTTTCACTTT[CG]GTTATTAGAAACAGGATGCTTCTGCTCCATGCCCTGAGGACTTCGTCCAGGGCGCCATTG	AAAACACTAACCTGGCTTCAGCGACGAGCAGCGCTCAGTCCCAGGCCTTACTTTCACTTT[CG]GTTATTAGAAACAGGATGCTTCTGCTCCATGCCCTGAGGACTTCGTCCAGGGCGCCATTG	GRCm10													chr2:51972744-51972995		FALSE	Nmi	NM_001141949.1	chr2	51948498	51973208	24711	-
1.33709	1.78642	7.16742	3.24091e-06	0.00180171	4.79833	cg38577841	45793991	AACRATACCTAAATCTTCTCAAAAAATTCATAAACTATCRTAATACTCTC						cg	R	B	C	II	1	2	76498898	Mus musculus	mm10	ACrATACCTaaaTCTTCTCAaaAaATTCATaAaCTaTCrTaATaCTCTCr	GGCAAATTGGAGACGATACCTGGGTCTTCTCAGGAGATTCATGAGCTGTCGTGATGCTCT[CG]CTTCACGCCTGTTATCTGTAAAGTACCACCTGATGTTTATCCACCTTTCATCGGGAAGCT	GGCAAATTGGAGACGATACCTGGGTCTTCTCAGGAGATTCATGAGCTGTCGTGATGCTCT[CG]CTTCACGCCTGTTATCTGTAAAGTACCACCTGATGTTTATCCACCTTTCATCGGGAAGCT	GRCm10															FALSE	Osbpl6	NM_001290734.1	chr2	76406507	76600647	194141	+
2.45496	-2.31915	7.16702	3.24303e-06	0.00180171	4.79771	cg29847556	50603188	CCRACCCAAATATACCTATTTACCAACTAATTTATAAAATCTATTCATAC						cg	F	T	C	II	1	11	82991457	Mus musculus	mm10	CraCCCAAaTaTACCTATTTACCAACTAATTTATaaAATCTATTCATACr	AAAGGGCCTGGAGAAGAGCTTATCTCCTTTCGAACAAGTTTTATGCTGTCTTGTGTAATT[CG]TATGAATAGATTCCATAAATTAGTTGGTAAATAGGTACACTTGGGCCGGTGACAGAACAC	AAAGGGCCTGGAGAAGAGCTTATCTCCTTTCGAACAAGTTTTATGCTGTCTTGTGTAATT[CG]TATGAATAGATTCCATAAATTAGTTGGTAAATAGGTACACTTGGGCCGGTGACAGAACAC	GRCm10															FALSE	Slfn9	NM_172796.2	chr11	82980302	82991830	11529	-
0.643527	-1.33267	7.1644	3.25705e-06	0.001806	4.79366	cg40615237	28805547	TTAAAAAATCTAACCTTTCCTACCATTATTCTTTTAAAATTAAATAAACC						cg	F	T	C	II	1	4	11579709	Mus musculus	mm10	TaaAAaATCTAaCCTTTCCTACCATTaTTCTTTTaaAATTAAaTAaaCCr	GATCTTTCTGTTTGTGAAAAGAGCTGAGCAGAGCTGAAGGCTGCATGGTGGTTTCAGAAA[CG]GCCTACTTAATTCCAAAAGAACAATGGTAGGAAAGGCTAGATCTTCCAATTTTACCTTAT	GATCTTTCTGTTTGTGAAAAGAGCTGAGCAGAGCTGAAGGCTGCATGGTGGTTTCAGAAA[CG]GCCTACTTAATTCCAAAAGAACAATGGTAGGAAAGGCTAGATCTTCCAATTTTACCTTAT	GRCm10															FALSE	Rad54b	NM_001256145.1	chr4	11558919	11587802	28884	+
0.669039	-0.529615	7.15359	3.31561e-06	0.00183491	4.77691	cg45311411	6630125	ACTTTATCATTCATAATTCCAAATACCTTAACAAAAAACATACCTAAATC						cg	R	B	C	II	1	8	3243394	Mus musculus	mm10	CTTTaTCATTCATaaTTCCAAaTaCCTTaaCAAAaaaCATaCCTaAaTCr	ACAAGAAATGAACTTTGTCATTCATGGTTCCAAGTGCCTTGGCAAAGGGCATGCCTGAGT[CG]CTACTGCCTTGGCGAGGCAGGAACGCTCTTTGGTTTTAAAGCTTTCTTGTTATTCATGCA	ACAAGAAATGAACTTTGTCATTCATGGTTCCAAGTGCCTTGGCAAAGGGCATGCCTGAGT[CG]CTACTGCCTTGGCGAGGCAGGAACGCTCTTTGGTTTTAAAGCTTTCTTGTTATTCATGCA	GRCm10															FALSE	Insr	NM_010568.2	chr8	3150921	3279617	128697	-
0.755712	0.228936	7.15128	3.3283e-06	0.00183838	4.77331	cg47123956	73789918	AAACTCTATTCAAACCAAAATAAACCCTAAATCTAACTCRAAACAAAAAC						cg	F	T	C	II	1	9	96984294	Mus musculus	mm10	AACTCTaTTCAAACCAAAaTaAACCCTaAATCTaaCTCraAaCAaAAaCr	TGTCAGGGTTATAGTGAGCCACAGAGTGGAGCTGGAACTCTGCTGATTGGTCTTTCATCT[CG]CTTCTGCTCCGAGCCAGATTCAGGGTTCACTTTGGTTTGAACAGAGTTCATTAGGTTTGC	TGTCAGGGTTATAGTGAGCCACAGAGTGGAGCTGGAACTCTGCTGATTGGTCTTTCATCT[CG]CTTCTGCTCCGAGCCAGATTCAGGGTTCACTTTGGTTTGAACAGAGTTCATTAGGTTTGC	GRCm10															FALSE	Spsb4	NM_145134.3	chr9	96943481	97018355	74875	-
0.533934	-0.534317	7.14228	3.37808e-06	0.00185945	4.75935	cg31422758	28754303	ATCACTCCAAATAATCCTATATACAAATTCCCCATTAAAAACTCATCTTC						cg	F	T	C	II	1	13	34278741	Mus musculus	mm10	TCACTCCAAATaATCCTaTaTaCAAaTTCCCCATTAAAAACTCATCTTCr	CTGGGAGGAGTGTGGAAAGGCGATCTTCTTAAAGTCGGTGAAGTCTGCCGTGTGGACTAT[CG]AAGATGAGTTTTTAATGGGGAACTTGCACACAGGATCATTTGGAGTGACATGTGTCTCAT	CTGGGAGGAGTGTGGAAAGGCGATCTTCTTAAAGTCGGTGAAGTCTGCCGTGTGGACTAT[CG]AAGATGAGTTTTTAATGGGGAACTTGCACACAGGATCATTTGGAGTGACATGTGTCTCAT	GRCm10															FALSE	Slc22a23	NM_001033167.3	chr13	34179157	34345182	166026	-
-1.31415	-4.10723	-7.14187	3.38038e-06	0.00185945	4.75871	cg40168712	5673599	ATCTAACTCACCTCCCACTATCAATATTAACAAAAAATTCATTAATCACA	19608505	ATCTAACTCGCCTCCCGCTATCAATATTAACGAAAAATTCATTAATCACG	A	Red	R	cg	F	T	C	I	1	3	108185932	Mus musculus	mm10	ATCTaaCTCrCCTCCCrCTaTCAaTaTTaaCraaAAATTCATTAaTCACr	TTAGTGACTTCACAGCTGCGCAGAGAAAGCAGAAGGAACGAAAAAAAAAAAAAAAAAAAA[CG]TGACTAATGAATTTCCCGCCAACACTGACAGCGGGAGGCGAGCCAGATTTCTTTAATTTG	TTAGTGACTTCACAGCTGCGCAGAGAAAGCAGAAGGAACGAAAAAAAAAAAAAAAAAAAA[CG]TGACTAATGAATTTCCCGCCAACACTGACAGCGGGAGGCGAGCCAGATTTCTTTAATTTG	GRCm10		chr3:108186153-108186736													FALSE	Amigo1	NM_001287093.1	chr3	108184788	108186088	1301	+
0.732174	0.714942	7.14087	3.38595e-06	0.00185945	4.75717	cg37762718	27803292	AATATATAACTAAAATTCTAAACAAATCAAATATTAAACCTCACCTAACC						cg	F	T	C	II	1	1	170196372	Mus musculus	mm10	ATaTaTAaCTAAAaTTCTaaaCAAaTCAAATATTAAACCTCACCTaaCCr	CACACGAATCAATCCAAGTTATTCCAAGAGAAAGGCGACAGTGCAGTTCCCCTGGGACAT[CG]GCCAGGTGAGGTTTAATATTTGACTTGCCCAGAACTTTAGCTACACATCATCCAACAGAT	CACACGAATCAATCCAAGTTATTCCAAGAGAAAGGCGACAGTGCAGTTCCCCTGGGACAT[CG]GCCAGGTGAGGTTTAATATTTGACTTGCCCAGAACTTTAGCTACACATCATCCAACAGAT	GRCm10															FALSE	.	.	.	.	.	.	.
0.450059	-0.724817	7.13859	3.39869e-06	0.00186287	4.75363	cg41562110	13746256	RACACCCAATAACTCCTTTCCTTAACCAAAATAAATACAATAAAACTAAC						cg	R	B	C	II	1	4	137043822	Mus musculus	mm10	ACACCCAaTAACTCCTTTCCTTAACCAaAaTAAATACAaTAaAACTAACr	CCCAGAATCTCGACACCCAGTAACTCCTTTCCTTAACCAGAGTAAATACAGTAGAACTAA[CG]GATCCACAAAAACCCAAGGTCTTTAATCTCCAGAGAAATAGTGACTCTCAGTGGACCCAT	CCCAGAATCTCGACACCCAGTAACTCCTTTCCTTAACCAGAGTAAATACAGTAGAACTAA[CG]GATCCACAAAAACCCAAGGTCTTTAATCTCCAGAGAAATAGTGACTCTCAGTGGACCCAT	GRCm10															FALSE	Zbtb40	NM_198248.1	chr4	136979731	137048695	68965	-
0.5709	-0.733869	7.13727	3.40612e-06	0.00186337	4.75158	cg36257875	82769348	TAATAACACRAAATACACRTAATTATACTATACCCTAATTAACTTTAATC						cg	R	B	C	II	1	19	25300048	Mus musculus	mm10	AATAACACrAAaTACACrTAaTTaTACTATaCCCTAATTAaCTTTAATCr	TTGTTTCATGTTAATAACACGAAGTACACGTAGTTGTACTATGCCCTAATTAGCTTTAAT[CG]TCAACTTAGCAGCCTACTGTCATCTGAGAGAAAAGCCTGATTGCACAATTTTCTGGATCA	TTGTTTCATGTTAATAACACGAAGTACACGTAGTTGTACTATGCCCTAATTAGCTTTAAT[CG]TCAACTTAGCAGCCTACTGTCATCTGAGAGAAAAGCCTGATTGCACAATTTTCTGGATCA	GRCm10															FALSE	Kank1	NM_181404.5	chr19	25237201	25434496	197296	+
0.492613	0.373266	7.13244	3.43341e-06	0.00187472	4.74407	cg36461058	63778594	CATAAACCTTTATTTCTATCCAAATACTAATCTCTCCRATAAACATCTCC						cg	R	B	C	II	1	19	46497153	Mus musculus	mm10	ATaAaCCTTTATTTCTaTCCAaATaCTaATCTCTCCraTaAACATCTCCr	TCTCCTTTGCTCATGAGCCTTTATTTCTGTCCAGATGCTGATCTCTCCGGTGAACATCTC[CG]GACTGTTAATGAGTGACCTCCAGCTTGCAGATCCACATAGCTCCCCACCCAAGTATCTCT	TCTCCTTTGCTCATGAGCCTTTATTTCTGTCCAGATGCTGATCTCTCCGGTGAACATCTC[CG]GACTGTTAATGAGTGACCTCCAGCTTGCAGATCCACATAGCTCCCCACCCAAGTATCTCT	GRCm10	chr19:46499986-46503035														FALSE	.	.	.	.	.	.	.
0.713109	0.710608	7.13107	3.44117e-06	0.00187527	4.74195	cg41572929	61612236	AAAACACACACAACCTTAAAAAATAATCCAAATAACCAATCTTTATACTC						cg	F	T	C	II	1	4	137785663	Mus musculus	mm10	aAaCACACACAaCCTTaaaaaATAaTCCAaATaaCCAaTCTTTaTACTCr	TTCTTGTAACCAGAGCTCAGAGAAATTGAGTACGTATTCTCCAGGTCAGGCAGTAGGTAT[CG]AGTACAAAGACTGGCCATCTGGACTATCCCCCAAGGCTGTGTGTGCTCCAAGGAACACAA	TTCTTGTAACCAGAGCTCAGAGAAATTGAGTACGTATTCTCCAGGTCAGGCAGTAGGTAT[CG]AGTACAAAGACTGGCCATCTGGACTATCCCCCAAGGCTGTGTGTGCTCCAAGGAACACAA	GRCm10															FALSE	Alpl	NM_007431.3	chr4	137741730	137796384	54655	-
0.592272	1.32341	7.12995	3.44752e-06	0.00187527	4.74022	cg46238050	26727935	ATAAAAACAAAAACACCTTAATAACCTCAACAATTCCAAAAAAATTCACA	5796935	ATAAAAACAAAAACGCCTTAATAACCTCGACAATTCCGAAAAAATTCACG	T	Red	R	cg	R	B	C	I	1	8	117742423	Mus musculus	mm10	aTAaAaaCAaAAACrCCTTaaTaACCTCrACAaTTCCrAAaAAaTTCACr	TGGACTTTCTAAGTAGAGGCAGAAACGCCTTGGTGACCTCGACAGTTCCGAAGAAGTTCA[CG]GCCATGCATTTTCTGTAGATGCTCATGGGTATGAGTTCCCCGTCGATAGGTAAGTGGAAG	TGGACTTTCTAAGTAGAGGCAGAAACGCCTTGGTGACCTCGACAGTTCCGAAGAAGTTCA[CG]GCCATGCATTTTCTGTAGATGCTCATGGGTATGAGTTCCCCGTCGATAGGTAAGTGGAAG	GRCm10															FALSE	Hsd17b2	NM_008290.2	chr8	117701945	117759029	57085	+
0.455161	0.537521	7.12255	3.48995e-06	0.00188739	4.72871	cg48049679	75775558	ACCRTATATAATCACAATCACCTACTAAAACCAAAACTTACCCTTTAAAC						cg	R	B	C	II	1	X	139596697	Mus musculus	mm10	CCrTaTaTaATCACAATCACCTACTaAAaCCAAaACTTaCCCTTTAaACr	TGTGCGTTTCCACCGTGTGTGATCACAATCACCTACTGAAGCCAAGACTTGCCCTTTAGA[CG]CTAAAGTTTCCATGGATGTGGGCAAAGGCGAACTTGTATTTGCAAGGGGCAAAGTCACAA	TGTGCGTTTCCACCGTGTGTGATCACAATCACCTACTGAAGCCAAGACTTGCCCTTTAGA[CG]CTAAAGTTTCCATGGATGTGGGCAAAGGCGAACTTGTATTTGCAAGGGGCAAAGTCACAA	GRCm10															FALSE	Rnf128	NM_001254761.1	chrX	139563339	139673145	109807	+
0.852432	-0.0316096	7.12227	3.4916e-06	0.00188739	4.72826	cg29906384	91601370	AAATCRCTAATACCACTAAAATAAACRTTATTACTAACCATACCTAAAAC						cg	R	B	C	II	1	11	88626579	Mus musculus	mm10	aaTCrCTaaTACCACTaAaATaaaCrTTaTTaCTaaCCATaCCTaaaACr	CTAGGGCGCTAGGGTCGCTGGTACCACTGAGATGGGCGTTGTTGCTGGCCATGCCTGGGA[CG]GCAAGGAGAGAAGATGTTAGACCAGGCAGCAGCACTTCTGGAGTGATTTCGCTCTCGTTT	CTAGGGCGCTAGGGTCGCTGGTACCACTGAGATGGGCGTTGTTGCTGGCCATGCCTGGGA[CG]GCAAGGAGAGAAGATGTTAGACCAGGCAGCAGCACTTCTGGAGTGATTTCGCTCTCGTTT	GRCm10															FALSE	Msi2	NM_054043.3	chr11	88339381	88718229	378849	-
0.8225	-4.94961	7.12127	3.49735e-06	0.00188739	4.72672	cg29575681	71760469	TAACAACCAAATTAACTAAACCRAAAACAACCCRTCCTCATACTTAAAAC						cg	F	T	C	II	1	11	57011772	Mus musculus	mm10	aACAaCCAaATTAACTaAaCCraaAaCAaCCCrTCCTCATaCTTaaAaCr	TGAGAGAGGCTGGCTGCTAGAGAAGAGGAGGAGAGCAGAGGGAGAGGGGGAGCGAGCTAG[CG]CTCCAAGCATGAGGACGGGCTGCTCCCGGCTCAGTTAATCTGGCTGTCAGTCGGTGTTAA	TGAGAGAGGCTGGCTGCTAGAGAAGAGGAGGAGAGCAGAGGGAGAGGGGGAGCGAGCTAG[CG]CTCCAAGCATGAGGACGGGCTGCTCCCGGCTCAGTTAATCTGGCTGTCAGTCGGTGTTAA	GRCm10															FALSE	Gria1	NM_001252403.1	chr11	57011545	57012845	1301	+
0.547468	-0.433071	7.11948	3.50771e-06	0.00188739	4.72394	cg40257615	17692227	ATTAACATCCACTCCTCTATAATTCACACATTCAAATTCTTTTCCCTAAC						cg	F	T	C	II	1	3	121875423	Mus musculus	mm10	TTaaCATCCACTCCTCTaTaATTCACACATTCAaaTTCTTTTCCCTaaCr	CAGGGCGAGAGTTAGGTGGAGAAAGGAGTGCCTATGAAATACAATCAGAATGTATGCCAA[CG]CCAGGGAAAAGAACCTGAATGTGTGAATCACAGAGGAGTGGATGCCAATAGGTCTGATGG	CAGGGCGAGAGTTAGGTGGAGAAAGGAGTGCCTATGAAATACAATCAGAATGTATGCCAA[CG]CCAGGGAAAAGAACCTGAATGTGTGAATCACAGAGGAGTGGATGCCAATAGGTCTGATGG	GRCm10															FALSE	.	.	.	.	.	.	.
0.718464	2.50856	7.11813	3.51554e-06	0.00188739	4.72184	cg43966295	92659579	CACATCTCTTATCTTCTTACCRAATTTTAATTCTAAATACAACATTCAAC						cg	F	T	C	II	1	6	125007936	Mus musculus	mm10	ACATCTCTTATCTTCTTACCraaTTTTAATTCTAAaTACAACATTCAaCr	AGTCCTTGCCCTTATGGAGCTGGGCAACAACACCAGGTGAGCTGTAAACAACAGCAGGTA[CG]CTGAATGTTGTACTTAGAATTAAAACCCGGTAAGAAGATAAGAGATGTGGGTGTTGGCAA	AGTCCTTGCCCTTATGGAGCTGGGCAACAACACCAGGTGAGCTGTAAACAACAGCAGGTA[CG]CTGAATGTTGTACTTAGAATTAAAACCCGGTAAGAAGATAAGAGATGTGGGTGTTGGCAA	GRCm10		chr6:125008833-125009436													FALSE	Zfp384	NM_001252083.1	chr6	125007737	125009037	1301	+
0.492347	-1.73571	7.11808	3.51586e-06	0.00188739	4.72175	cg29748415	91625498	CTTCCCAAAATTAAAACTAAAACCCTATAAACTCCTCAAAAATACACCAC						cg	F	T	C	II	1	11	73283909	Mus musculus	mm10	TTCCCAaAaTTaAaaCTaaAaCCCTaTaaaCTCCTCAaAAaTaCACCACr	GGCTGCCAAGATGGGCAAGGCTGAGGTGGGGCCCCGCAGCAGATGTGGGGGCTGGGGAAA[CG]TGGTGCACTTCTGAGGAGCCCACAGGGCTCCAGCCTCAACTCTGGGAAGGCTGCAGCTTA	GGCTGCCAAGATGGGCAAGGCTGAGGTGGGGCCCCGCAGCAGATGTGGGGGCTGGGGAAA[CG]TGGTGCACTTCTGAGGAGCCCACAGGGCTCCAGCCTCAACTCTGGGAAGGCTGCAGCTTA	GRCm10															FALSE	Trpv3	NM_145099.2	chr11	73267619	73297200	29582	+
0.58369	1.23139	7.11567	3.5299e-06	0.00188739	4.718	cg38177810	71630390	CTTAACAAATCCCTTCTCTACATAACACRTATTATTTAAAATCAAATATC						cg	R	B	C	II	1	2	27363922	Mus musculus	mm10	TTaACAAATCCCTTCTCTaCATaaCACrTaTTATTTaaaaTCAaATaTCr	CTCAGTATGAGCTTGACAAATCCCTTCTCTGCATGGCACGTGTTATTTGGGGTCAGATGT[CG]CAGTCTTGCCCCAGAAAGCAAATTTCTTCTGCGCTGACCTGTCATGCTGTTCACAGGGTC	CTCAGTATGAGCTTGACAAATCCCTTCTCTGCATGGCACGTGTTATTTGGGGTCAGATGT[CG]CAGTCTTGCCCCAGAAAGCAAATTTCTTCTGCGCTGACCTGTCATGCTGTTCACAGGGTC	GRCm10															FALSE	Vav2	NM_009500.2	chr2	27262103	27427608	165506	-
0.535623	-0.244405	7.11517	3.53283e-06	0.00188739	4.71722	cg28981997	35626223	TCAAAAAATCAAAACACAAAATACTTCAACTTCAACTTTTTAATATCCAC						cg	F	T	C	II	1	10	111117181	Mus musculus	mm10	CAAAaaaTCAaAaCACAAaaTaCTTCAaCTTCAaCTTTTTaATaTCCACr	AATAGGGATTTTTACAAATGTGGCCCAGGAATCTCAAACTGTTTTTGAAGGAGTAATAGA[CG]TGGACATCAAAAAGCTGAAGCTGAAGCACCTTGTGCTCTGACCCTTTGACCAGGACCCAG	AATAGGGATTTTTACAAATGTGGCCCAGGAATCTCAAACTGTTTTTGAAGGAGTAATAGA[CG]TGGACATCAAAAAGCTGAAGCTGAAGCACCTTGTGCTCTGACCCTTTGACCAGGACCCAG	GRCm10															FALSE	.	.	.	.	.	.	.
0.607254	-0.484464	7.11471	3.5355e-06	0.00188739	4.71651	cg42838603	91719250	AAAATTCAAAATACACCTTAATCTAAATACATTTCAAATCTCCAAAAACC						cg	F	T	C	II	1	5	130200592	Mus musculus	mm10	aAATTCAAAaTaCACCTTAATCTAAaTaCATTTCAAATCTCCAAaAACCr	GTCACATACTCTAGCTTTACGACAATACTCAGATAAATTTATTAAATACAACGTAGGGAA[CG]GTTCTTGGAGATTTGAAATGCACTTAGATTAAGGTGCACTTTGAATTCTTCAAATGTGTT	GTCACATACTCTAGCTTTACGACAATACTCAGATAAATTTATTAAATACAACGTAGGGAA[CG]GTTCTTGGAGATTTGAAATGCACTTAGATTAAGGTGCACTTTGAATTCTTCAAATGTGTT	GRCm10															FALSE	Rabgef1	NM_001199059.1	chr5	130171818	130214337	42520	+
0.572785	0.797524	7.11467	3.53576e-06	0.00188739	4.71644	cg39872879	10735402	AAAAATAAAAACCTACTTTAAAACACCTTAACTAATATCAACTTTACTTC						cg	F	T	C	II	1	3	69724321	Mus musculus	mm10	aAAATaaAaACCTaCTTTaaAACACCTTaaCTaATaTCAACTTTACTTCr	TGCTGTGAATGTGGTGTCCCAATTAGTCCAAATCCTGCCAATATTTGTGTGGCCTGTTTA[CG]AAGTAAAGTTGACATCAGCCAAGGTGTTCCAAAGCAGGTCTCCATTTCTTTCTGCAAACA	TGCTGTGAATGTGGTGTCCCAATTAGTCCAAATCCTGCCAATATTTGTGTGGCCTGTTTA[CG]AAGTAAAGTTGACATCAGCCAAGGTGTTCCAAAGCAGGTCTCCATTTCTTTCTGCAAACA	GRCm10													chr3:69721871-69722735		FALSE	Nmd3	NM_133787.2	chr3	69722054	69749047	26994	+
0.638305	0.402804	7.11274	3.54704e-06	0.00188874	4.71344	cg41159631	19809821	AATACTAACTATTATCACTTTCCTATTCCTAATTAACATCCTCAAAAACC						cg	F	T	C	II	1	4	96663898	Mus musculus	mm10	aTACTaaCTaTTaTCACTTTCCTaTTCCTaATTAACATCCTCAaAAaCCr	TGAAAGAAGTTGCCCACAAAGGGCAGACGCCATGGCCCTGGTGGGTAGTTTTTGGGGTGA[CG]GCTTCTGAGGATGTTAATCAGGAACAGGAAAGTGACAACAGCCAGTACCAGAGTCTTGAG	TGAAAGAAGTTGCCCACAAAGGGCAGACGCCATGGCCCTGGTGGGTAGTTTTTGGGGTGA[CG]GCTTCTGAGGATGTTAATCAGGAACAGGAAAGTGACAACAGCCAGTACCAGAGTCTTGAG	GRCm10															FALSE	Cyp2j5	NM_010007.4	chr4	96627431	96664119	36689	-
-1.32521	-6.88498	-7.10923	3.5677e-06	0.00188874	4.70798	cg32241849	76730979	AAAAAATACCCAAAACCTAAAAACCTAACATAAAACACAATATAAAAACA	38801520	AAAAAATACCCGAAACCTAAAAACCTAACGTAAAACGCGATATAAAAACG	T	Red	R	cg	R	B	C	I	1	14	20546304	Mus musculus	mm10	aAaAaaTACCCrAAaCCTaaaaaCCTaaCrTaAaaCrCraTaTaAaaaCr	GTCGTCAAAGGTGAGAGGTACCCGAAGCCTGGGGGCCTGGCGTGAGGCGCGGTGTGAGGG[CG]GGCGGGAGTCCGTCCCCTCAGGAGCGGGCCTGGCGGGGCGGGCGAGTGACTGGCTGCCTC	GTCGTCAAAGGTGAGAGGTACCCGAAGCCTGGGGGCCTGGCGTGAGGCGCGGTGTGAGGG[CG]GGCGGGAGTCCGTCCCCTCAGGAGCGGGCCTGGCGGGGCGGGCGAGTGACTGGCTGCCTC	GRCm10			chr14:20545846-20546601	chr14	20545846	20546601	755	87	524	23	69.4	0.96			FALSE	Ppp3cb	NM_008914.3	chr14	20499363	20546573	47211	-
0.728467	-0.940524	7.10787	3.57576e-06	0.00188874	4.70586	cg45746139	76774291	TCRAACTACTTAAAATAATAATTAAACCRCTAAATCCTTCACTAACATTC						cg	R	B	C	II	1	8	60756327	Mus musculus	mm10	CraaCTACTTaaaATaATaATTAAACCrCTAAaTCCTTCACTaaCATTCr	TGGTGAGCGCCTCGGGCTACTTGGGATGATGATTAAACCGCTAAGTCCTTCACTGGCATT[CG]CCTTGAGACAAAGCCATCACGGGAGCACATGCAGTTCTGACTCTGACTTTTTTATTAACC	TGGTGAGCGCCTCGGGCTACTTGGGATGATGATTAAACCGCTAAGTCCTTCACTGGCATT[CG]CCTTGAGACAAAGCCATCACGGGAGCACATGCAGTTCTGACTCTGACTTTTTTATTAACC	GRCm10															FALSE	.	.	.	.	.	.	.
0.421507	-0.988735	7.10562	3.58906e-06	0.00188874	4.70236	cg43299950	3661406	AAACTAAAAACCAAACTTCCCAAAACCTAATTCTACTCTTAAACTCTACC						cg	F	T	C	II	1	6	34865501	Mus musculus	mm10	aaCTaAaaACCAaaCTTCCCAaaACCTaaTTCTaCTCTTaAaCTCTaCCr	ATGAAATCCTAGCCTGGGAAGGGGATGGCACAGTTCCCTCCTCAGAACTGCAGGGAAGAG[CG]GCAGAGCTCAAGAGCAGAACCAGGTCCTGGGAAGCCTGGTCCTCAGCCCAGGAGTCGGCT	ATGAAATCCTAGCCTGGGAAGGGGATGGCACAGTTCCCTCCTCAGAACTGCAGGGAAGAG[CG]GCAGAGCTCAAGAGCAGAACCAGGTCCTGGGAAGCCTGGTCCTCAGCCCAGGAGTCGGCT	GRCm10															FALSE	Tmem140	NM_197986.2	chr6	34863145	34874946	11802	+
0.502115	-0.616666	7.10424	3.59731e-06	0.00188874	4.7002	cg45063458	48710970	CTTCCAAAAAACAAAACCRAAATAAACTTTAACCTAAAATAATACTCCCC						cg	F	T	C	II	1	7	120173826	Mus musculus	mm10	TTCCAAaaAaCAAaaCCraAaTaAACTTTaaCCTaaaaTaATACTCCCCr	GAGTCTTTGTCTAGGCAGAGCTGGTAACACAGTCTTCCAACAGGGCTGGTTAATCAGTGA[CG]GGGAGTATCACCCCAGGCCAAAGTTCACTCCGGCCTTGCTCCTTGGAAGGCAGCCAGCCA	GAGTCTTTGTCTAGGCAGAGCTGGTAACACAGTCTTCCAACAGGGCTGGTTAATCAGTGA[CG]GGGAGTATCACCCCAGGCCAAAGTTCACTCCGGCCTTGCTCCTTGGAAGGCAGCCAGCCA	GRCm10															FALSE	Anks4b	NM_028085.2	chr7	120173657	120173857	201	+
0.451999	-0.333472	7.10357	3.6013e-06	0.00188874	4.69916	cg46574518	5682554	ATATATCTATTTCCAAACTACAATTTATTAATTTATCTAATCCTATACCC						cg	F	T	C	II	1	9	32157207	Mus musculus	mm10	TaTATCTATTTCCAaACTACAaTTTaTTaaTTTaTCTAaTCCTaTaCCCr	TTAGAATACTTTATTTTCTTTTTATTATCATTCTTGTTTTTTCCCTGTCTTAACTGTGGT[CG]GGCACAGGACTAGACAAACCAACAAACTGTAGTCTGGAAATAGATACATGTGTATCTCTA	TTAGAATACTTTATTTTCTTTTTATTATCATTCTTGTTTTTTCCCTGTCTTAACTGTGGT[CG]GGCACAGGACTAGACAAACCAACAAACTGTAGTCTGGAAATAGATACATGTGTATCTCTA	GRCm10															FALSE	Arhgap32	NM_001195632.1	chr9	32116135	32265511	149377	+
1.01455	-4.78554	7.1025	3.60764e-06	0.00188874	4.6975	cg38795559	3750312	ATTATAATTTACTCCRCTACCTTAAACACATCRACTTAACCAAAATTTAC						cg	R	B	C	II	1	2	109692986	Mus musculus	mm10	TTATaaTTTACTCCrCTACCTTAAACACATCraCTTAACCAaAaTTTaCr	GAGTGTGCGGGGTTATGGTTTACTCCGCTACCTTAAACACATCGGCTTAACCAGAGTTTG[CG]CCCTGACCTCTCCGGAGTGTGCCTAATAGAATTCAATCAAGATAATAACAGTATTTTTTA	GAGTGTGCGGGGTTATGGTTTACTCCGCTACCTTAAACACATCGGCTTAACCAGAGTTTG[CG]CCCTGACCTCTCCGGAGTGTGCCTAATAGAATTCAATCAAGATAATAACAGTATTTTTTA	GRCm10		chr2:109693466-109694207													FALSE	Bdnf	NM_007540.4	chr2	109674699	109727043	52345	+
-0.570813	2.00303	-7.10093	3.61704e-06	0.00188874	4.69506	cg29952004	10744218	ACTTTAAAAACCTTCCAAAATCTTCACACAAAAATATAACCAAAAACACA	43728242	ACTTTAAAAACCTTCCAAAATCTTCACACAAAAATATAACCAAAAACACG	G	Grn	G	cg	R	B	C	I	1	11	94394527	Mus musculus	mm10	aCTTTaAaaACCTTCCAaAaTCTTCACACAaAAaTaTAACCAAaaaCACr	TGACTGCTGGCTGCTTTGAGGACCTTCCAGAGTCTTCACACAGAAGTGTAACCAAGGGCA[CG]CTGACAAGTTACGGAAGCTCCACGAAGTCTTCTGTACAGAGGTTGGAGGAAGACAGGATG	TGACTGCTGGCTGCTTTGAGGACCTTCCAGAGTCTTCACACAGAAGTGTAACCAAGGGCA[CG]CTGACAAGTTACGGAAGCTCCACGAAGTCTTCTGTACAGAGGTTGGAGGAAGACAGGATG	GRCm10															FALSE	.	.	.	.	.	.	.
0.477686	-0.810324	7.10044	3.61997e-06	0.00188874	4.69429	cg40824516	90782370	CRACTACAAATAAAATTATTAATCTACAAAACAACCRCAAATAACTAACC						cg	F	T	C	II	1	4	44943633	Mus musculus	mm10	rACTaCAAATaaAaTTaTTaaTCTaCAaAACAACCrCAaaTaaCTaACCr	TTGACCCTCCTTTGTGTTAATCAATAACCCAGGCCACCCTTGGTCAGTCATCTGCACCCT[CG]GTCAGCCACCTGCGGTTGTTCTGCAGACCAACAACTCCATTTGCAGTCGGTGGCCCTGTC	TTGACCCTCCTTTGTGTTAATCAATAACCCAGGCCACCCTTGGTCAGTCATCTGCACCCT[CG]GTCAGCCACCTGCGGTTGTTCTGCAGACCAACAACTCCATTTGCAGTCGGTGGCCCTGTC	GRCm10															FALSE	.	.	.	.	.	.	.
0.751554	-2.55429	7.09917	3.62759e-06	0.00188874	4.69232	cg29940775	92664127	ATTCAAAAATCCRAAAAACCCTCTAATATAACTACTTTAACTCTTATACC						cg	F	T	C	II	1	11	93097763	Mus musculus	mm10	TTCAAaAATCCraaaAaCCCTCTaaTaTAACTACTTTaaCTCTTATaCCr	ATCTGCACAGTAGATGCAGCAAACACAGCGAACATCCAGACTGTGTGGCATCTAAGGGTG[CG]GCATAAGAGCCAAAGTAGTTACACCAGAGGGCTCCCCGGATTCTTGAATGGAGTCTAGGA	ATCTGCACAGTAGATGCAGCAAACACAGCGAACATCCAGACTGTGTGGCATCTAAGGGTG[CG]GCATAAGAGCCAAAGTAGTTACACCAGAGGGCTCCCCGGATTCTTGAATGGAGTCTAGGA	GRCm10		chr11:93098299-93100196													FALSE	.	.	.	.	.	.	.
0.594906	1.42367	7.09775	3.63613e-06	0.00188874	4.6901	cg29309920	44742139	AACTCCAATATCTATATATTTTCTTAACAACATTACTACRCTCTCTAATC						cg	F	T	C	II	1	11	21257963	Mus musculus	mm10	ACTCCAATaTCTaTaTATTTTCTTAaCAaCATTaCTACrCTCTCTaaTCr	TCCTTGAAACTCTTTTGCCTCATGAGTGACTTTTAAGCCTTTCGGCTTGTCCAGTTGACT[CG]ACCAGAGAGCGTAGCAATGCTGCTAAGAAAATACACAGACATTGGAGTCTTTAAAGGCAT	TCCTTGAAACTCTTTTGCCTCATGAGTGACTTTTAAGCCTTTCGGCTTGTCCAGTTGACT[CG]ACCAGAGAGCGTAGCAATGCTGCTAAGAAAATACACAGACATTGGAGTCTTTAAAGGCAT	GRCm10															FALSE	Vps54	NM_001290628.1	chr11	21239031	21321133	82103	+
0.991875	1.67495	7.09761	3.63701e-06	0.00188874	4.68987	cg36034576	97749450	CTCTTATCAACACTTAAAATATAATCTTAATTTTTCTCCTTTCTTTCTAC						cg	R	B	C	II	1	18	84677033	Mus musculus	mm10	TCTTaTCAACACTTAaAATaTaaTCTTaaTTTTTCTCCTTTCTTTCTaCr	ACTCAGCAAGGCTCTTGTCAACACTTAGAATGTGGTCTTGGTTTTTCTCCTTTCTTTCTG[CG]CTGAGATCAAACCCAGGTCCTCATGCATGCTGGGAAACTGCTCTGCCATTGAGCTGTATC	ACTCAGCAAGGCTCTTGTCAACACTTAGAATGTGGTCTTGGTTTTTCTCCTTTCTTTCTG[CG]CTGAGATCAAACCCAGGTCCTCATGCATGCTGGGAAACTGCTCTGCCATTGAGCTGTATC	GRCm10															FALSE	Cndp2	NM_001289531.1	chr18	84667464	84682059	14596	-
0.545555	-0.495719	7.09624	3.64524e-06	0.00188874	4.68775	cg29251908	71776409	AAAATAACRACACAACTATAAACTTAATACTTAAACAACTTACTCTCATC						cg	R	B	C	II	1	11	11898131	Mus musculus	mm10	AaaTaaCrACACAACTaTaAACTTaaTaCTTaaaCAACTTACTCTCATCr	GAACTGAAGAGGAGGTGGCGACACAACTGTGAACTTGGTGCTTGGGCAACTTACTCTCAT[CG]ATGCTTTGAACTGACCCATTTCTTTGTCCTTACATTTTAGCCTTGTATTCTGGTTAAACA	GAACTGAAGAGGAGGTGGCGACACAACTGTGAACTTGGTGCTTGGGCAACTTACTCTCAT[CG]ATGCTTTGAACTGACCCATTTCTTTGTCCTTACATTTTAGCCTTGTATTCTGGTTAAACA	GRCm10															FALSE	Ddc	NM_001190448.1	chr11	11814100	11898144	84045	-
0.48074	-1.32466	7.09514	3.6519e-06	0.00188874	4.68603	cg29768742	63790161	TACTCTCTCTTAAAACAAATCRCCAATTAATACATAACATTCCAACCTCC						cg	F	T	C	II	1	11	75632236	Mus musculus	mm10	ACTCTCTCTTaaaACAAaTCrCCAaTTaaTACATAACATTCCAACCTCCr	GGATGTGGTGGTATTTAAGAGCTGTTGATTATTTCTCCTGATACTGAGACTTGTGGAGAG[CG]GAGGTTGGAATGTTATGTACCAACTGGCGACTTGTCCCAAGAGAGAGTAGACTCGTGAGA	GGATGTGGTGGTATTTAAGAGCTGTTGATTATTTCTCCTGATACTGAGACTTGTGGAGAG[CG]GAGGTTGGAATGTTATGTACCAACTGGCGACTTGTCCCAAGAGAGAGTAGACTCGTGAGA	GRCm10													chr11:75630686-75631233		FALSE	Inpp5k	NM_008916.2	chr11	75631019	75648865	17847	+
0.808873	0.0823839	7.09282	3.66599e-06	0.00188874	4.6824	cg47125730	87667855	AATTCTATTTCAACCTTTAACCCRAATAAATTCTACAATTTTCTCAAACC						cg	R	B	C	II	1	9	97133073	Mus musculus	mm10	aTTCTaTTTCAaCCTTTaACCCrAATaaATTCTaCAaTTTTCTCAAACCr	TTTTGTACACAAGTTCTGTTTCAGCCTTTGACCCGAATGGATTCTGCAGTTTTCTCAAAC[CG]CATTCACAGTTTGGCTACTTTCTGACTTCTACAGCGACCCATTCCTTACGTGCCCATACC	TTTTGTACACAAGTTCTGTTTCAGCCTTTGACCCGAATGGATTCTGCAGTTTTCTCAAAC[CG]CATTCACAGTTTGGCTACTTTCTGACTTCTACAGCGACCCATTCCTTACGTGCCCATACC	GRCm10															FALSE	.	.	.	.	.	.	.
0.589494	-0.153145	7.09262	3.66719e-06	0.00188874	4.6821	cg39809876	61627181	ATTTTAACCAATCACCAAATATTACCTAACTTATTCAATCCAAATTCCAC						cg	R	B	C	II	1	3	60031688	Mus musculus	mm10	TTTTAACCAaTCACCAAaTaTTACCTAACTTATTCAaTCCAAATTCCACr	TTGGATGTTGAATTTTAACCAGTCACCAAGTGTTACCTAACTTATTCAGTCCAAATTCCA[CG]ACGCAATCTCTTAAAGCACAGGCACTCCAAATCTACAAAGAATTTCAAAGCAGAGCTTTA	TTGGATGTTGAATTTTAACCAGTCACCAAGTGTTACCTAACTTATTCAGTCCAAATTCCA[CG]ACGCAATCTCTTAAAGCACAGGCACTCCAAATCTACAAAGAATTTCAAAGCAGAGCTTTA	GRCm10															FALSE	Aadac	NM_023383.1	chr3	60031587	60031787	201	+
0.557641	-1.83314	7.09217	3.66995e-06	0.00188874	4.68139	cg47834700	55654274	AATCCTACCTCCTTACAAACTATTACTAAACRACAAAAAACTACAAATCC						cg	F	T	C	II	1	X	94366859	Mus musculus	mm10	aTCCTaCCTCCTTaCAaaCTaTTaCTAaaCraCAAAAaaCTaCAaaTCCr	CCGGCGCGGCAGGGAGCCAGAGAACCGCCTTCTTCTCACCACAGCGTGCGGCCGCCCACA[CG]GACCTGCAGCCTTTTGCCGCCTAGCAACAGCCTGCAAGGAGGCAGGACTGTCTAGGAGGC	CCGGCGCGGCAGGGAGCCAGAGAACCGCCTTCTTCTCACCACAGCGTGCGGCCGCCCACA[CG]GACCTGCAGCCTTTTGCCGCCTAGCAACAGCCTGCAAGGAGGCAGGACTGTCTAGGAGGC	GRCm10			chrX:94366646-94367151	chrX	94366646	94367151	505	45	326	17.8	64.6	0.86			FALSE	Apoo	NM_026673.4	chrX	94365609	94366909	1301	+
0.531908	-0.0749285	7.09151	3.67393e-06	0.00188874	4.68037	cg41317495	24654121	TATCTCATCATTTCAAATTAAAAAACAAACTCCACCTAATTCCAAATATC						cg	R	B	C	II	1	4	116649660	Mus musculus	mm10	aTCTCATCATTTCAaATTaAaAAaCAAaCTCCACCTaATTCCAaaTATCr	TCTCATTTCGCTGTCTCATCATTTCAGATTGAGAAGCAAGCTCCACCTGATTCCAGGTAT[CG]GCACATTTTCTTTCCCCAAACTTCACACTTGCCTAGCTAATTGTTACTTACCATTGAGCT	TCTCATTTCGCTGTCTCATCATTTCAGATTGAGAAGCAAGCTCCACCTGATTCCAGGTAT[CG]GCACATTTTCTTTCCCCAAACTTCACACTTGCCTAGCTAATTGTTACTTACCATTGAGCT	GRCm10		chr4:116651418-116651698													FALSE	Akr1a1	NM_021473.3	chr4	116636509	116651674	15166	-
-0.951041	-4.21677	-7.09091	3.67761e-06	0.00188874	4.67942	cg32861129	3742863	ACCTATCCCACTTACCCAAATATTTATATCTTTTACTTACACCAAAAAAC						cg	F	T	C	II	1	14	103098685	Mus musculus	mm10	CCTATCCCACTTaCCCAaATaTTTaTATCTTTTaCTTACACCAAAAaaCr	GGTAACACGGGGCGGGTTACAGACATTTTAACATCTACAGGGACATTTTTTTTTTAAATT[CG]CCTTTTGGTGTAAGCAAAAGATACAAACATCTGGGCAAGTGGGATAGGCACCATTACCAA	GGTAACACGGGGCGGGTTACAGACATTTTAACATCTACAGGGACATTTTTTTTTTAAATT[CG]CCTTTTGGTGTAAGCAAAAGATACAAACATCTGGGCAAGTGGGATAGGCACCATTACCAA	GRCm10		chr14:103098752-103099853													FALSE	Fbxl3	NM_015822.2	chr14	103080238	103099509	19272	-
0.525014	-0.34351	7.09028	3.68142e-06	0.00188874	4.67845	cg34486854	52666549	AAAACCACRCCAACTAACCTCATAACTATATACCAAAAAATATAATTAAC						cg	R	B	C	II	1	16	91386033	Mus musculus	mm10	AaaCCACrCCAACTaACCTCATaACTaTaTACCAaAaaaTaTAaTTAaCr	AAAAACACAAAAAGGCCACGCCAACTGACCTCATGACTGTGTACCAGAGGGTGTAGTTAG[CG]GGTGGGCCAGACTTGTTCTCTAATTCCCAGGATAAAATTAGCCGGGAATTTCGTATTGTT	AAAAACACAAAAAGGCCACGCCAACTGACCTCATGACTGTGTACCAGAGGGTGTAGTTAG[CG]GGTGGGCCAGACTTGTTCTCTAATTCCCAGGATAAAATTAGCCGGGAATTTCGTATTGTT	GRCm10															FALSE	Ifnar2	NM_001110498.1	chr16	91372782	91394043	21262	+
0.454059	-1.562	7.08945	3.6865e-06	0.00188874	4.67715	cg35388117	40605550	CTATCAAACCATAAAAAACTAATCCCATATAAAATTACCACATTACCTCC						cg	F	T	C	II	1	18	4994627	Mus musculus	mm10	TATCAaaCCATAAAAaaCTaaTCCCATaTaaAaTTaCCACATTaCCTCCr	GTCATCCATTACTGGGTAAATCCACATGAAACCTGAGGACACTGCCGTGGAGGACACAAT[CG]GAGGCAATGTGGCAACTCCACATGGGACCAGCCTTTTATGGCCTGATAGCAGCTAATGGG	GTCATCCATTACTGGGTAAATCCACATGAAACCTGAGGACACTGCCGTGGAGGACACAAT[CG]GAGGCAATGTGGCAACTCCACATGGGACCAGCCTTTTATGGCCTGATAGCAGCTAATGGG	GRCm10															FALSE	.	.	.	.	.	.	.
0.550466	-1.78695	7.08917	3.6882e-06	0.00188874	4.67672	cg39300090	68760536	TAAACRATATTATCAAAAACAATTTCTCCTCCATTTTCTACAAACTAAAC						cg	F	T	C	II	1	2	168085678	Mus musculus	mm10	AaaCrATaTTATCAaAaaCAaTTTCTCCTCCATTTTCTaCAaaCTaaACr	GGGGTGATAGCCTGGCGTGAGTCAGCCTGCACTGTGTGGACTGTGGCTGTGCGGGGAGAA[CG]TCCAGCCTGCAGAAAATGGAGGAGAAACTGCCTCTGATAACATCGCCTAACTGACTGATA	GGGGTGATAGCCTGGCGTGAGTCAGCCTGCACTGTGTGGACTGTGGCTGTGCGGGGAGAA[CG]TCCAGCCTGCAGAAAATGGAGGAGAAACTGCCTCTGATAACATCGCCTAACTGACTGATA	GRCm10															FALSE	Pard6b	NM_021409.2	chr2	168081003	168101203	20201	+
-0.978785	-4.73132	-7.08886	3.69013e-06	0.00188874	4.67623	cg46444918	74652320	CTTTTTCCCRTATCTTTACTAATTAATCACTACRTCAACCTATAAAAAAC						cg	R	B	C	II	1	9	14500518	Mus musculus	mm10	TTTTTCCCrTaTCTTTaCTaATTaaTCACTaCrTCAaCCTaTaAaAaACr	CGTCATTCCATCTTTTTCCCGTGTCTTTGCTGATTGGTCACTGCGTCAGCCTGTGAGAGA[CG]GTTTAAAAAAAAAAAAAAAAAAAACACACACACAACTCCGGAATTGCTTCCGGGTGTGGA	CGTCATTCCATCTTTTTCCCGTGTCTTTGCTGATTGGTCACTGCGTCAGCCTGTGAGAGA[CG]GTTTAAAAAAAAAAAAAAAAAAAACACACACACAACTCCGGAATTGCTTCCGGGTGTGGA	GRCm10			chr9:14500256-14500932	chr9	14500256	14500932	676	54	392	16	58	0.96			FALSE	Cwc15	NM_023153.3	chr9	14500418	14500618	201	+
0.537053	0.866544	7.08457	3.71643e-06	0.00189361	4.66954	cg44811539	3600269	CAAAACTCAAATAATCTTTAAAACCTCCAATCAAACTAAATTCTACTAAC						cg	F	T	C	II	1	7	84227101	Mus musculus	mm10	AaaaCTCAaaTaATCTTTaAAACCTCCAaTCAAaCTAaaTTCTACTaaCr	CATCTGTTCTGTGTTAACCCTCCCTGTAGCCCATATAACCCTGGAGGAGTACAAGGTTGA[CG]CCAGTAGAACCTAGCTTGACTGGAGGTTTCAAAGATCACCTGAGCCCTGATATCTGCTTG	CATCTGTTCTGTGTTAACCCTCCCTGTAGCCCATATAACCCTGGAGGAGTACAAGGTTGA[CG]CCAGTAGAACCTAGCTTGACTGGAGGTTTCAAAGATCACCTGAGCCCTGATATCTGCTTG	GRCm10															FALSE	.	.	.	.	.	.	.
0.525047	-1.20349	7.08448	3.71701e-06	0.00189361	4.6694	cg38797416	81660273	AAAATCAAACTCTACTACCAAATAATCTAACAAATTATTAAATCACCTTC						cg	R	B	C	II	1	2	109934799	Mus musculus	mm10	aaaTCAaACTCTaCTaCCAaaTAaTCTaaCAAaTTaTTAAATCACCTTCr	ATATGATCTTCAGGGTCAGACTCTGCTGCCAGGTAGTCTGGCAAGTTGTTAAATCACCTT[CG]GGAGAGAAGTTCCCCTCGAGCTGGCAGCAGGCTTTTTCTTTTCTCAGTGTTAGATTCCTG	ATATGATCTTCAGGGTCAGACTCTGCTGCCAGGTAGTCTGGCAAGTTGTTAAATCACCTT[CG]GGAGAGAAGTTCCCCTCGAGCTGGCAGCAGGCTTTTTCTTTTCTCAGTGTTAGATTCCTG	GRCm10															FALSE	Lgr4	NM_172671.2	chr2	109917646	110014257	96612	+
0.516287	-1.05241	7.0825	3.72922e-06	0.00189361	4.66631	cg33963684	51787541	AATAAAACCACTCTATCCTACTACCAAAAAAACAAATCCATAAACTATAC						cg	F	T	C	II	1	16	18083851	Mus musculus	mm10	ATaAaaCCACTCTaTCCTaCTaCCAAaAAaaCAaaTCCATaAaCTaTaCr	CTGGAGTTCCCCCCGCTGGCACCAACTTGCTGCAAGGCCCTTCCCCAGGCAGCGAGCTTT[CG]CACAGCTCATGGACCTGCCTTCTTGGCAGCAGGACAGAGTGGCCTCATTCTGCCCTCTGG	CTGGAGTTCCCCCCGCTGGCACCAACTTGCTGCAAGGCCCTTCCCCAGGCAGCGAGCTTT[CG]CACAGCTCATGGACCTGCCTTCTTGGCAGCAGGACAGAGTGGCCTCATTCTGCCCTCTGG	GRCm10															FALSE	Prodh	NM_011172.2	chr16	18071725	18089190	17466	-
0.918461	1.56789	7.08149	3.73549e-06	0.00189361	4.66473	cg36196046	68706861	AATCCATAAAAAATCCATTTAACATAATAAATCTATAACTTCTAATCTCA	10707115	AATCCATAAAAAATCCATTTAACATAATAAATCTATAACTTCTAATCTCG	A	Red	R	cg	R	B	C	I	1	19	17372742	Mus musculus	mm10	AaTCCATAaAAAaTCCATTTAaCATaaTAAaTCTaTaaCTTCTaATCTCr	AATGGGTTTTATAGTCCATAGAAAGTCCATTTAGCATGGTAAGTCTGTGGCTTCTGATCT[CG]TGACACAGGTGTGTTGAATCTATGGTGCAATGCATGCTCCCTTCATGGCTGTAGGAGTGG	AATGGGTTTTATAGTCCATAGAAAGTCCATTTAGCATGGTAAGTCTGTGGCTTCTGATCT[CG]TGACACAGGTGTGTTGAATCTATGGTGCAATGCATGCTCCCTTCATGGCTGTAGGAGTGG	GRCm10															FALSE	Gcnt1	NM_010265.5	chr19	17326140	17372844	46705	-
0.494549	-1.24327	7.08084	3.73949e-06	0.00189361	4.66372	cg36467655	45709400	ATAAATAACAAATTACTAAATTTTCRAAACCCRTAAACCTCCTACAAAAC						cg	R	B	C	II	1	19	46969711	Mus musculus	mm10	TAAaTaACAAaTTaCTaaATTTTCraAACCCrTaaACCTCCTaCAAAaCr	AAGCTAAAACAATAAGTGACAAGTTGCTGGATTTTCGGAACCCGTGGACCTCCTGCAAAG[CG]CTTCGGTCGGCCTGGGCACTGAACTTGACCAGTTAATCAGTACCCACGTGGGAAGCAAAG	AAGCTAAAACAATAAGTGACAAGTTGCTGGATTTTCGGAACCCGTGGACCTCCTGCAAAG[CG]CTTCGGTCGGCCTGGGCACTGAACTTGACCAGTTAATCAGTACCCACGTGGGAAGCAAAG	GRCm10															FALSE	Nt5c2	NM_001164363.1	chr19	46886830	47015189	128360	-
0.523947	0.119794	7.08038	3.74239e-06	0.00189361	4.66299	cg30157941	46649893	TCATAAATCCAATATATTATATATACAAACTAACACRTATAAACATCACC						cg	F	T	C	II	1	11	110544555	Mus musculus	mm10	CATaaaTCCAaTaTATTaTaTaTaCAAACTAaCACrTaTAaACATCACCr	ACTCTGACACTGGACTCTGCTCTTTCCTTGGAATCACTTTGACACAAGTTCCTTAAAGAG[CG]GTGATGTCTACACGTGCTAGTTTGCACACACAATACACTGGACCCATGATCCGGGTTAGT	ACTCTGACACTGGACTCTGCTCTTTCCTTGGAATCACTTTGACACAAGTTCCTTAAAGAG[CG]GTGATGTCTACACGTGCTAGTTTGCACACACAATACACTGGACCCATGATCCGGGTTAGT	GRCm10															FALSE	.	.	.	.	.	.	.
-1.74279	-5.24367	-7.0798	3.74598e-06	0.00189361	4.66209	cg28720219	68775585	AAACTACAAAACAATAACACTATAACAAAACTAACAACAACTCCTAAACA	74717176	AAACTACGAAACGATAACGCTATAACAAAACTAACGACGACTCCTAAACG	T	Red	R	cg	R	B	C	I	1	10	80387598	Mus musculus	mm10	aaaCTaCraaaCraTaaCrCTaTaaCAaaaCTaaCraCraCTCCTaaaCr	TGCGGGGACGCGGGGCTGCGGGGCGGTGGCGCTGTGGCAGGGCTGGCGGCGGCTCCTGGG[CG]GCCGAGGCGGCGGCGGCGGCGGCGGCGGCGGCGGCGGTGGCACGGGACGCTCGTGCCCTC	TGCGGGGACGCGGGGCTGCGGGGCGGTGGCGCTGTGGCAGGGCTGGCGGCGGCTCCTGGG[CG]GCCGAGGCGGCGGCGGCGGCGGCGGCGGCGGCGGCGGTGGCACGGGACGCTCGTGCCCTC	GRCm10			chr10:80386626-80387907	chr10	80386626	80387907	1281	131	751	20.5	58.6	1.19			FALSE	Mex3d	NM_198615.2	chr10	80380354	80387651	7298	-
-1.06335	-5.22909	-7.07809	3.75663e-06	0.00189564	4.65941	cg34566189	61601305	TACACATAACTATATATATAAATCTCTCATAACTACCTCAAAAAAACTCA	16800540	TACGCGTAACTATATATATAAATCTCTCATAACTACCTCGAAAAAACTCG	T	Red	R	cg	R	B	C	I	1	17	3557692	Mus musculus	mm10	TaCrCrTaaCTaTaTATaTaaaTCTCTCATaaCTaCCTCraaaAAaCTCr	CTTTCCAGCCGCTGCGCGTGGCTGTGTATGTGGGTCTCTCATGGCTGCCTCGGGGAAGCT[CG]GCACTTTCCGCCTTCCCCCGTTGCCCACCATTCGGGAGATCATTAAGTTGTTCGGACTGC	CTTTCCAGCCGCTGCGCGTGGCTGTGTATGTGGGTCTCTCATGGCTGCCTCGGGGAAGCT[CG]GCACTTTCCGCCTTCCCCCGTTGCCCACCATTCGGGAGATCATTAAGTTGTTCGGACTGC	GRCm10			chr17:3557391-3557765	chr17	3557391	3557765	374	39	243	20.9	65	0.99			FALSE	Tfb1m	NM_146074.1	chr17	3519255	3557713	38459	-
-0.510313	2.0156	-7.07504	3.77564e-06	0.00189968	4.65466	cg46034971	48675273	CTAACTCTAACTCTAACTCTAACTCTAATTCCTACTAAAATTCTAACTCC						cg	F	T	C	II	1	8	95303713	Mus musculus	mm10	TaaCTCTaaCTCTaaCTCTaaCTCTaaTTCCTaCTaAaaTTCTaaCTCCr	CCGTGGAGACAGCAGGACCACAGCCAGAAACAGAGTCGAAACCAGAGGCCAACCCACAAC[CG]GAGCCAGAACCTCAGCAGGAACCAGAGCCAGAGCCAGAGCCAGAGCCAGAGCCAGAGCCA	CCGTGGAGACAGCAGGACCACAGCCAGAAACAGAGTCGAAACCAGAGGCCAACCCACAAC[CG]GAGCCAGAACCTCAGCAGGAACCAGAGCCAGAGCCAGAGCCAGAGCCAGAGCCAGAGCCA	GRCm10															FALSE	Cngb1	NM_001195413.1	chr8	95239042	95306585	67544	-
0.573429	-0.213856	7.0743	3.78027e-06	0.00189968	4.65351	cg40261314	61711250	AAATTCTTACCTAAAAATACRAACATCTACTTTCAAAAAAATTCCCTCAC						cg	F	T	C	II	1	3	122206097	Mus musculus	mm10	aaTTCTTaCCTaAaAATACrAaCATCTACTTTCAAAAaAATTCCCTCACr	GACCCGAATCCTGTCTGTGTGACCAGGATCTGGTCTTCCTACAAACTGGTGAGGAAGGTA[CG]TGAGGGAATTCTTTTGAAAGTAGATGCTCGTATTCTCAGGCAAGAACCTCAAGATACTGG	GACCCGAATCCTGTCTGTGTGACCAGGATCTGGTCTTCCTACAAACTGGTGAGGAAGGTA[CG]TGAGGGAATTCTTTTGAAAGTAGATGCTCGTATTCTCAGGCAAGAACCTCAAGATACTGG	GRCm10															FALSE	.	.	.	.	.	.	.
0.553532	-1.34179	7.07363	3.78453e-06	0.00189968	4.65245	cg42230525	76725201	AATTACTAACAATTATTATAAACTTAAACCATATACCAAAATTCTACCCC						cg	F	T	C	II	1	5	66050968	Mus musculus	mm10	aTTACTAACAaTTATTaTAAaCTTaaaCCATATaCCAAAATTCTACCCCr	TTCTAGCACTCTTCGTGACACTAGGTCGAACCCCAGGAAATTGGCACATTGAAGGACAAA[CG]GGGTAGAATTTTGGCATATGGCCCAAGCTTACAATAACTGTTAGTAACTGGGTTCATTAT	TTCTAGCACTCTTCGTGACACTAGGTCGAACCCCAGGAAATTGGCACATTGAAGGACAAA[CG]GGGTAGAATTTTGGCATATGGCCCAAGCTTACAATAACTGTTAGTAACTGGGTTCATTAT	GRCm10															FALSE	Rbm47	NM_139065.3	chr5	66016548	66098179	81632	-
-0.673037	-4.05721	-7.06685	3.82735e-06	0.00191672	4.64185	cg41630851	41702349	CAAACATAAAAACTTTAACCTCTAAAAACCTCTTAACRTAAAAACTAACC						cg	R	B	C	II	1	4	141538889	Mus musculus	mm10	AaaCATAaaaACTTTaaCCTCTAaAAACCTCTTaaCrTaaAAACTAACCr	CGTAGGGCAGACAGGCATAGGGACTTTGGCCTCTAGAAACCTCTTGGCGTGGAAACTAAC[CG]GGTTCTCTTGTGTTTCCCCAGAGCAACGCCTGACCGCAGGCAGAAGCGGCCCCATCCTCC	CGTAGGGCAGACAGGCATAGGGACTTTGGCCTCTAGAAACCTCTTGGCGTGGAAACTAAC[CG]GGTTCTCTTGTGTTTCCCCAGAGCAACGCCTGACCGCAGGCAGAAGCGGCCCCATCCTCC	GRCm10													chr4:141536261-141538862		FALSE	Spen	NM_019763.2	chr4	141538797	141540097	1301	-
0.8698	0.0970868	7.06614	3.83188e-06	0.00191672	4.64074	cg36427653	97612503	CAAAACTCACTTACTAACTTCCAATAAAAAAATTTCACAACATCATTTAC						cg	R	B	C	II	1	19	44021748	Mus musculus	mm10	AAAACTCACTTACTAaCTTCCAATAAAaAaATTTCACAACATCATTTaCr	AAACCTCTGTGCAAAACTCACTTACTAGCTTCCAATAAAGAGATTTCACAACATCATTTG[CG]CAACTGCTTCTGTCTCCTGCCAGCTGGCCAAAGAGTATGGGCCTGTTTACACTCTGTACT	AAACCTCTGTGCAAAACTCACTTACTAGCTTCCAATAAAGAGATTTCACAACATCATTTG[CG]CAACTGCTTCTGTCTCCTGCCAGCTGGCCAAAGAGTATGGGCCTGTTTACACTCTGTACT	GRCm10															FALSE	Cyp2c44	NM_001001446.3	chr19	44005021	44029247	24227	-
-0.544886	-3.95768	-7.06312	3.8511e-06	0.00192209	4.63603	cg44912667	14653130	TCCATAAAAAAAATCAATAACTCATACCCAAAATTCATATCCAACCCAAC						cg	R	B	C	II	1	7	100159804	Mus musculus	mm10	CCATaAaaaAaaTCAaTaaCTCATaCCCAaAaTTCATaTCCAaCCCAaCr	TTTGTCTCAGCTCCATGAGGGAGGTCAGTGGCTCATGCCCAGAGTTCATGTCCAGCCCAG[CG]CTCCCCGATGTTAGCCCTGCCCAGGCTCCGCCCCGGTCCCGCCCCGGCGCGCTCACCGAT	TTTGTCTCAGCTCCATGAGGGAGGTCAGTGGCTCATGCCCAGAGTTCATGTCCAGCCCAG[CG]CTCCCCGATGTTAGCCCTGCCCAGGCTCCGCCCCGGTCCCGCCCCGGCGCGCTCACCGAT	GRCm10			chr7:100159214-100159805	chr7	100159214	100159805	591	68	410	23	69.4	0.96	chr7:100159214-100159805		FALSE	Lipt2	NM_026010.2	chr7	100159276	100160931	1656	+
0.529261	-2.49327	7.06235	3.85606e-06	0.00192209	4.63482	cg38854191	90632587	ATATCCAAAACTATATAACAAAACTTATTTCCAAAACCCAAAAAAACCCC						cg	F	T	C	II	1	2	118529545	Mus musculus	mm10	TaTCCAaAaCTATaTaaCAaAaCTTaTTTCCAaAaCCCAaAaAaaCCCCr	CTCCCTGCCATGCTCAGTGTTGGGCTTGCGTTTCGCCACTGGGGCAGCAAGGCAGGCCAG[CG]GGGCCTCTCTGGGCTCTGGAAACAAGCTCTGCCACATAGCTCTGGACACAGCCCATCCCC	CTCCCTGCCATGCTCAGTGTTGGGCTTGCGTTTCGCCACTGGGGCAGCAAGGCAGGCCAG[CG]GGGCCTCTCTGGGCTCTGGAAACAAGCTCTGCCACATAGCTCTGGACACAGCCCATCCCC	GRCm10															FALSE	Bmf	NM_001311140.1	chr2	118528756	118547560	18805	-
0.684306	-1.03451	7.06088	3.86549e-06	0.00192344	4.63252	cg32852314	14605930	TACAAAACAAAACTAACATCAAAATATAAATTACTACTCACTAACTAAAC						cg	F	T	C	II	1	14	101840574	Mus musculus	mm10	aCAaAaCAaAaCTaACATCAAAaTaTAaATTaCTaCTCACTaaCTAaaCr	ATACACTGTTCCTGTGATCTTTGTGACTGGCACGTTAAACATTACCTGTTATAGGACAAG[CG]CCTAGCCAGTGAGCAGCAATCTACACTTTGATGTCAGCTCTGCTCTGCAAACAAACGCCC	ATACACTGTTCCTGTGATCTTTGTGACTGGCACGTTAAACATTACCTGTTATAGGACAAG[CG]CCTAGCCAGTGAGCAGCAATCTACACTTTGATGTCAGCTCTGCTCTGCAAACAAACGCCC	GRCm10															FALSE	Lmo7	NM_201529.2	chr14	101729927	101934693	204767	+
0.590004	0.278874	7.05758	3.88674e-06	0.00193066	4.62735	cg42621500	61603900	AAAAAAACCTTTCCCCAAATCTCTCCTTTTTTAAATCACCAATCTCAAAC						cg	F	T	C	II	1	5	114004036	Mus musculus	mm10	aaaaaACCTTTCCCCAAaTCTCTCCTTTTTTaaaTCACCAATCTCAaaCr	AAACAACATGGTGTCTTACCCAGAGTCCTCTCCATGTCAACAATCCAGGTTCAACATCAG[CG]CCTGAGATTGGTGACCCAAAAAAGGAGAGACTTGGGGAAAGGTCCCCCTGAGAGATGACA	AAACAACATGGTGTCTTACCCAGAGTCCTCTCCATGTCAACAATCCAGGTTCAACATCAG[CG]CCTGAGATTGGTGACCCAAAAAAGGAGAGACTTGGGGAAAGGTCCCCCTGAGAGATGACA	GRCm10															FALSE	Dao	NM_001286396.1	chr5	114003307	114004607	1301	+
0.591339	0.0987506	7.05455	3.90634e-06	0.0019352	4.62262	cg28627633	97620421	ATTTATAAATTACCCAACATTCCCCTCCCTTAAATTAATTTTACATATCC						cg	F	T	C	II	1	10	71146780	Mus musculus	mm10	TTTATaAATTACCCAaCATTCCCCTCCCTTaAaTTaATTTTaCATaTCCr	TCAGCTGAGGGAGCGCGGAGAGGATGTGAGTAGATGTGAGAGTGTCCTTTTGGATGAGGA[CG]GACATGCAAAATCAACTCAAGGGAGGGGAATGCTGGGTAATTCATAAACATATCTCACCT	TCAGCTGAGGGAGCGCGGAGAGGATGTGAGTAGATGTGAGAGTGTCCTTTTGGATGAGGA[CG]GACATGCAAAATCAACTCAAGGGAGGGGAATGCTGGGTAATTCATAAACATATCTCACCT	GRCm10															FALSE	Bicc1	NM_031397.2	chr10	70925085	71159634	234550	-
0.487131	1.08609	7.05371	3.9118e-06	0.0019352	4.6213	cg47090904	73740901	CACAACTCTATAAACCCTACCAAAATCTAAAAAAAACRTCTTCTATCTTC						cg	R	B	C	II	1	9	92602491	Mus musculus	mm10	ACAaCTCTaTAaaCCCTaCCAaaaTCTAAaAaaaACrTCTTCTaTCTTCr	GACTCAGCACCCACAGCTCTGTAGGCCCTGCCAGGGTCTAAGAGGGACGTCTTCTGTCTT[CG]CCCTAAACCCAGTCAATGTGGCAGACACCACTGGGTCAAGGAAGTCTCTTTGTACCTGTT	GACTCAGCACCCACAGCTCTGTAGGCCCTGCCAGGGTCTAAGAGGGACGTCTTCTGTCTT[CG]CCCTAAACCCAGTCAATGTGGCAGACACCACTGGGTCAAGGAAGTCTCTTTGTACCTGTT	GRCm10															FALSE	Plod2	NM_011961.3	chr9	92542222	92608428	66207	+
0.667488	1.23407	7.05132	3.92739e-06	0.0019352	4.61755	cg41686668	24685554	ATAAAATCAAAATTTAAAATCTACTTACCCCATATACTTAACATCATCCA	9782861	GTAAAATCGAAATTTAAAATCTACTTACCCCGTATACTTAACATCATCCG	T	Red	R	cg	F	T	C	I	1	4	148462939	Mus musculus	mm10	rTaAaaTCraAaTTTAAaaTCTACTTaCCCCrTaTACTTaACATCATCCr	CGGAGAAATCCTATCGGAGGTGCTTACTTGTGGGCAAAGTCCTTTGGAGGAAGCGCTGCT[CG]GATGATGTCAAGTACACGGGGCAAGTAGACCTTAAACTCCGACCTCACGGCCACAGAAAG	CGGAGAAATCCTATCGGAGGTGCTTACTTGTGGGCAAAGTCCTTTGGAGGAAGCGCTGCT[CG]GATGATGTCAAGTACACGGGGCAAGTAGACCTTAAACTCCGACCTCACGGCCACAGAAAG	GRCm10															FALSE	Mtor	NM_020009.2	chr4	148448581	148557685	109105	+
0.684764	1.16657	7.05024	3.93443e-06	0.0019352	4.61587	cg31275684	93719110	TTACTCTAACACAAACAAATCTAAAAAACCAACTAAATAATACCRACTAC						mu	F	T	C	II	1	13	12619858	Mus musculus	mm10	TaCTCTaaCACAaaCAaATCTaAAaAaCCAaCTaaaTaATaCCraCTACr	NNNNNNNNNNNNNNNNNNNNNNNNNNNNNNNNNNNNNNNNNNNNNNNNNNNNNNNNNNNN[NN]NNNNNNNNNNNNNNNNNNNNNNNNNNNNNNNNNNNNNNNNNNNNNNNNNNNNNNNNNNNN	AATAAACCACCAAGGTGGTGGGTAGGAGCTCCCACACGAAAAGCACCACGCCAAACACTA[CG]TAGCCGGCATCACCCAGCTGGCTCTTCAGATCTGCCTGTGCCAGAGCAAGAAGAGAGTCA	GRCm10															TRUE	Gpr137b-ps	NR_003568.1	chr13	12614064	12650395	36332	-
0.795151	2.39124	7.04954	3.93901e-06	0.0019352	4.61477	cg40754904	5647158	AAACAACATCACTTTATAAATCACCTTAATACTCRTAAAAAAACTAACTC						cg	F	T	C	II	1	4	35213155	Mus musculus	mm10	aACAaCATCACTTTATAaATCACCTTaATaCTCrTaAaAaaaCTaaCTCr	TTAGTCTGTTTACAGTGTTGGGAGAACTCTTAATAAGTGTGCCGAAGTCTAGAGCCAGCA[CG]AGCCAGCCCTCTCACGAGCATCAAGGTGATCTATAAAGTGATGCTGTCTATGCACTTTTC	TTAGTCTGTTTACAGTGTTGGGAGAACTCTTAATAAGTGTGCCGAAGTCTAGAGCCAGCA[CG]AGCCAGCCCTCTCACGAGCATCAAGGTGATCTATAAAGTGATGCTGTCTATGCACTTTTC	GRCm10															FALSE	3110043O21Rik	NM_001081343.1	chr4	35191281	35225880	34600	-
0.560452	0.297449	7.0492	3.94125e-06	0.0019352	4.61423	cg37207736	65604224	ATTAACAACCATATACACTTAATATCTAATCCTACAAACCTTAACTTTCC						cg	R	B	C	II	1	1	89513701	Mus musculus	mm10	TTAACAACCATaTACACTTaATATCTaATCCTaCAAACCTTaaCTTTCCr	ACAGTTGATGTGTTAACAACCATGTACACTTGATATCTGATCCTGCAAACCTTGGCTTTC[CG]CTACTTTTGTTTTGGACTACAAGGTCTTGCTGTGTAGTCTACACTGACCTTCAGACTCTC	ACAGTTGATGTGTTAACAACCATGTACACTTGATATCTGATCCTGCAAACCTTGGCTTTC[CG]CTACTTTTGTTTTGGACTACAAGGTCTTGCTGTGTAGTCTACACTGACCTTCAGACTCTC	GRCm10															FALSE	Agap1	NM_001037136.1	chr1	89454810	89895282	440473	+
0.465119	-0.300918	7.0489	3.94324e-06	0.0019352	4.61376	cg34596785	55642595	CATTCCCAAAATCCTCTACTCATAAACACTACTCTAATATTCAAACAAAC						cg	F	T	C	II	1	17	6728622	Mus musculus	mm10	ATTCCCAaAATCCTCTaCTCATaAACACTaCTCTaATATTCAaaCAAACr	TGCACATCTCAAGCTAACACCTGGGCACAGGGCAACTTGAAAGATTGGTTTGTCTTGTTA[CG]TTTGCCTGAATATCAGAGCAGTGTTCATGAGCAGAGGATTCTGGGAATGAAGCTGCTGGG	TGCACATCTCAAGCTAACACCTGGGCACAGGGCAACTTGAAAGATTGGTTTGTCTTGTTA[CG]TTTGCCTGAATATCAGAGCAGTGTTCATGAGCAGAGGATTCTGGGAATGAAGCTGCTGGG	GRCm10															TRUE	Sytl3	NM_031395.2	chr17	6673609	6738044	64436	+
0.659111	0.0926471	7.04787	3.95e-06	0.0019352	4.61215	cg40351807	22789352	AAAAAACTCTACTAAACTCTTTTAAACTTTTAAAACACATAAACTCACTC						cg	R	B	C	II	1	3	132907805	Mus musculus	mm10	aaAaACTCTACTaAaCTCTTTTaAACTTTTaaAACACATaAaCTCACTCr	TAGCTCCTTGCAGGAGACTCTACTGAGCTCTTTTGAACTTTTGGAACACATGAGCTCACT[CG]CCACTTGCAATGGTCTTGTGTTAATCACATTCTAAAGAAAGGGAGGCCCAAGCTCAAAGA	TAGCTCCTTGCAGGAGACTCTACTGAGCTCTTTTGAACTTTTGGAACACATGAGCTCACT[CG]CCACTTGCAATGGTCTTGTGTTAATCACATTCTAAAGAAAGGGAGGCCCAAGCTCAAAGA	GRCm10															FALSE	Npnt	NM_001287103.1	chr3	132881744	132949814	68071	-
0.58518	1.65258	7.04441	3.97278e-06	0.00194303	4.60673	cg45802725	17736343	AAAAACATAATCCACATACTAACACCCATCTAAACAAAAACTAAATAACA	55758960	AAAAACATAATCCGCGTACTAACACCCGTCTAAACAAAAACTAAATAACG	T	Red	R	cg	R	B	C	I	1	8	69826518	Mus musculus	mm10	aaAAaCATaATCCrCrTaCTaaCACCCrTCTaaaCAaAAaCTaAaTAACr	CGGCCATTCTCAGGAAGCATGATCCGCGTGCTGGCACCCGTCTGGGCAGAAGCTGAGTAA[CG]GGCAGACTTGTGGCTGGACCAGCGGAGACACATGCAGCAGAGAAGGCGGCGGAAGGTGCG	CGGCCATTCTCAGGAAGCATGATCCGCGTGCTGGCACCCGTCTGGGCAGAAGCTGAGTAA[CG]GGCAGACTTGTGGCTGGACCAGCGGAGACACATGCAGCAGAGAAGGCGGCGGAAGGTGCG	GRCm10															FALSE	Lpar2	NM_020028.3	chr8	69822564	69831102	8539	+
0.863497	-0.329339	7.04003	4.00185e-06	0.00194771	4.59986	cg46451795	6612454	AAAAAAATTCCTATACAATAATAAAAATCCRAACTAAACTACCTTTATAC						cg	F	T	C	II	1	9	15241874	Mus musculus	mm10	AaaAAATTCCTaTaCAaTAaTaAAaATCCraaCTaAaCTaCCTTTaTaCr	TCTCCTCAGCTAAATAAGCAGCCGCCCCACTCTCGACTTCTACCTTCCTCAGAACACTGA[CG]CACAAAGGCAGCTCAGCCCGGATCTTCACTACTGCACAGGAATTTCCTCCGCACTGTCCA	TCTCCTCAGCTAAATAAGCAGCCGCCCCACTCTCGACTTCTACCTTCCTCAGAACACTGA[CG]CACAAAGGCAGCTCAGCCCGGATCTTCACTACTGCACAGGAATTTCCTCCGCACTGTCCA	GRCm10															FALSE	Vstm5	NM_026955.2	chr9	15239044	15259413	20370	+
0.69624	0.380594	7.03968	4.00419e-06	0.00194771	4.59931	cg46119394	19672849	ATACTCTCTACTACCATAAAACTTACAACCTTTAAACRAAATAAAATAAC						cg	F	T	C	II	1	8	107164382	Mus musculus	mm10	TACTCTCTaCTACCATAaaACTTaCAaCCTTTaAaCraaaTaaAaTaaCr	TGCTGTGCTATCTTCAGAGGTCAGATAAGGAAAGGAGACTTGAGAACAGTTCACAAGGTG[CG]CCACTCCACCCCGCTCAAAGGCTGCAAGTCCTATGGTAGCAGAGAGTACATTCTAGACCT	TGCTGTGCTATCTTCAGAGGTCAGATAAGGAAAGGAGACTTGAGAACAGTTCACAAGGTG[CG]CCACTCCACCCCGCTCAAAGGCTGCAAGTCCTATGGTAGCAGAGAGTACATTCTAGACCT	GRCm10															FALSE	Cyb5b	NM_025558.5	chr8	107150660	107187470	36811	+
0.643169	0.167184	7.03933	4.00653e-06	0.00194771	4.59876	cg29906377	49699471	ACCCATATAACAACTCTATACCCTATAATTAACCTCTACTAAATAAATAC						cg	F	T	C	II	1	11	88626326	Mus musculus	mm10	CCCATaTaaCAaCTCTaTACCCTaTAATTAaCCTCTaCTaAATaAaTaCr	AGCGTCTTCTCTTTTCTTCATTTGGTGGTGTAATTGACCCCTCGTACCTCCATCCGGCTT[CG]CACTCATTCAGCAGAGGCTAATTACAGGGTACAGAGCTGCCACATGGGTCCGAGCGACAT	AGCGTCTTCTCTTTTCTTCATTTGGTGGTGTAATTGACCCCTCGTACCTCCATCCGGCTT[CG]CACTCATTCAGCAGAGGCTAATTACAGGGTACAGAGCTGCCACATGGGTCCGAGCGACAT	GRCm10															FALSE	Msi2	NM_054043.3	chr11	88339381	88718229	378849	-
0.79645	1.50536	7.03887	4.00956e-06	0.00194771	4.59805	cg31220889	86710301	CAAAAATCCTTCRAAATAATACAAATAAATAATATAAACCAACAAAACCC						cg	F	T	C	II	1	13	3895683	Mus musculus	mm10	AAAaaTCCTTCrAaATAATACAAATAAATAaTaTAaaCCAaCAaaACCCr	CTGTTGGCCTCACTTGCGTTGGTTTTTAACTGAGGAAGCTAACTGGACCAAGTGTCTCAG[CG]GGTCCTGCTGGCCTACACTATTTATTTGTATTATCTCGAAGGACCTTTGATCTTACCTGA	CTGTTGGCCTCACTTGCGTTGGTTTTTAACTGAGGAAGCTAACTGGACCAAGTGTCTCAG[CG]GGTCCTGCTGGCCTACACTATTTATTTGTATTATCTCGAAGGACCTTTGATCTTACCTGA	GRCm10														chr13:3893449-3893682	FALSE	Net1	NM_019671.3	chr13	3882017	3918220	36204	-
0.809043	-2.30674	7.03717	4.02091e-06	0.00194991	4.59538	cg41416178	31791531	ATAACTCTAAACAAATCCRACTAACAAAACAAACRAAACTATTCCCTAAC						cg	R	B	C	II	1	4	126147848	Mus musculus	mm10	TaACTCTaaaCAaaTCCraCTAaCAAAaCAAaCrAaaCTaTTCCCTAaCr	GAAGCACACGTGTGACTCTGGGCAGGTCCGGCTAGCAAAGCAAGCGAGGCTGTTCCCTAG[CG]CCGAGGCCCCCGCTGGGGTCTGCAATATGCTGGGACCTGGCTCACCGCCGAGTCCGACAA	GAAGCACACGTGTGACTCTGGGCAGGTCCGGCTAGCAAAGCAAGCGAGGCTGTTCCCTAG[CG]CCGAGGCCCCCGCTGGGGTCTGCAATATGCTGGGACCTGGCTCACCGCCGAGTCCGACAA	GRCm10		chr4:126148497-126149680													FALSE	Eva1b	NM_172145.3	chr4	126147802	126148002	201	+
0.557903	0.921954	7.0346	4.03819e-06	0.00195299	4.59134	cg38270129	13739189	TTCTTACCACCTTCTTTAACTAATCATACAAAACCRTTCRATAACAAAAC						cg	F	T	C	II	1	2	34602289	Mus musculus	mm10	TCTTaCCACCTTCTTTAACTAaTCATaCAaAACCrTTCrATAaCAAaaCr	GTTGCACTGGGCTTAAGAGAATGTTAACGCGGTAATAGGCACAGGGCCTTCCCCATTATA[CG]CCTTGCTATCGAACGGTTCTGCATGACTAGTTAAAGAAGGTGGCAAGAAGATTAATGAAA	GTTGCACTGGGCTTAAGAGAATGTTAACGCGGTAATAGGCACAGGGCCTTCCCCATTATA[CG]CCTTGCTATCGAACGGTTCTGCATGACTAGTTAAAGAAGGTGGCAAGAAGATTAATGAAA	GRCm10															FALSE	Mapkap1	NM_001290625.1	chr2	34406770	34624958	218189	+
-0.870919	-3.37061	-7.03351	4.04553e-06	0.00195299	4.58963	cg31348457	37623329	TTACATAAAAACCTACATTTTATTTTTCRCATCCAATCCTTTTTCATATC						cg	R	B	C	II	1	13	23750914	Mus musculus	mm10	TaCATAAAaaCCTaCATTTTATTTTTCrCATCCAaTCCTTTTTCATATCr	GAGCTCCTCATTTGCATAAAGGCCTGCATTTTATTTTTCGCATCCAGTCCTTTTTCATAT[CG]TTCTTTAAAAAATAAAAACCACGTAGATTCTGGGATTTAAACTCTGGTTTTCATGATTAA	GAGCTCCTCATTTGCATAAAGGCCTGCATTTTATTTTTCGCATCCAGTCCTTTTTCATAT[CG]TTCTTTAAAAAATAAAAACCACGTAGATTCTGGGATTTAAACTCTGGTTTTCATGATTAA	GRCm10		chr13:23751125-23751454												chr13:23746881-23747149	FALSE	Hist1h3b	NM_178203.2	chr13	23750879	23752179	1301	+
-1.2204	-5.38026	-7.03224	4.05403e-06	0.00195299	4.58766	cg34529877	85764149	AACACACACCATTTTATAAAATTTACAAAAATCCTCATCAAAAAAAAACA	10784896	AACGCGCGCCATTTTATAAAATTTACAAAAATCCTCGTCGAAAAAAAACG	T	Red	R	cg	R	B	C	I	1	16	94570197	Mus musculus	mm10	AaCrCrCrCCATTTTaTaAaATTTACAAAAATCCTCrTCraaAAaAAaCr	GCGCAGCTTCGGAGCGCGCGCCATTTTGTGAGATTTACAAAAATCCTCGTCGGGAAGAAG[CG]GCCGGCAGCGGCCGCCACTCGGCGCCCGGCCTCGCCGCCGCCGCCGCCCTCCGCACCGGG	GCGCAGCTTCGGAGCGCGCGCCATTTTGTGAGATTTACAAAAATCCTCGTCGGGAAGAAG[CG]GCCGGCAGCGGCCGCCACTCGGCGCCCGGCCTCGCCGCCGCCGCCGCCCTCCGCACCGGG	GRCm10			chr16:94568960-94571088	chr16	94568960	94571088	2128	195	1121	18.3	52.7	1.35			FALSE	Dyrk1a	NM_001113389.1	chr16	94569406	94570706	1301	+
-0.597532	-1.55001	-7.03217	4.05456e-06	0.00195299	4.58753	cg47231062	76699110	AACRTAATCATAACCCRAACRATAACCAAAATAAACTACAAAATATTACC						cg	F	T	C	II	1	9	107677454	Mus musculus	mm10	aCrTaaTCATAaCCCrAACrATaaCCAaaATaaACTaCAaAaTaTTaCCr	GATTATCCACCAGGACGGGTATTCGCTGGAGGAATGCCTCGAGTTCATTGCCATCATCTA[CG]GCAACACTCTGCAGTCCATCCTGGCCATCGTTCGGGCTATGACCACGCTCAACATTCAGT	GATTATCCACCAGGACGGGTATTCGCTGGAGGAATGCCTCGAGTTCATTGCCATCATCTA[CG]GCAACACTCTGCAGTCCATCCTGGCCATCGTTCGGGCTATGACCACGCTCAACATTCAGT	GRCm10													chr9:107675931-107676718		TRUE	Gnat1	NM_008140.2	chr9	107674473	107679592	5120	-
0.565518	0.529022	7.02982	4.07045e-06	0.00195414	4.58385	cg44678467	67709391	ATCTCTCTAAACTAATAAAAAACAACAATCRTCAATCAATATTACTATCC						cg	F	T	C	II	1	7	68096430	Mus musculus	mm10	TCTCTCTaAACTaaTaAaaAACAaCAaTCrTCAaTCAaTATTACTaTCCr	TCCCTTTGCAAACAGCCAGTCATTCAAAAGCACCTGCCTGGGGCCAGTGTAGAGAAATAA[CG]GACAGTAATACTGACTGACGACTGCTGTTCCTCACCAGTTCAGAGAGACCTTCCTTGCTT	TCCCTTTGCAAACAGCCAGTCATTCAAAAGCACCTGCCTGGGGCCAGTGTAGAGAAATAA[CG]GACAGTAATACTGACTGACGACTGCTGTTCCTCACCAGTTCAGAGAGACCTTCCTTGCTT	GRCm10															FALSE	Igf1r	NM_010513.2	chr7	67952256	68233667	281412	+
0.515972	-2.19724	7.02893	4.0765e-06	0.00195414	4.58245	cg45818055	61754369	TAAACCCCCTATCTAAAACTATCCACACATTAACCRTATTAAAAAAAACC						cg	R	B	C	II	1	8	70798146	Mus musculus	mm10	aaaCCCCCTaTCTaaAACTaTCCACACATTaACCrTaTTaaAaAaaACCr	GGTTCCACTCCTGGGCCCCCTGTCTGGAACTGTCCACACATTGACCGTGTTGGAGAGGAC[CG]CCGTCGGACTCCTCCTGCCCTGCCCGCCGTTGGTCCTCTCCAACACCAAACCTCACCTCC	GGTTCCACTCCTGGGCCCCCTGTCTGGAACTGTCCACACATTGACCGTGTTGGAGAGGAC[CG]CCGTCGGACTCCTCCTGCCCTGCCCGCCGTTGGTCCTCTCCAACACCAAACCTCACCTCC	GRCm10													chr8:70796816-70797959		FALSE	Mir7240	NR_106099.1	chr8	70798134	70798192	59	+
0.49154	-0.573826	7.02879	4.07744e-06	0.00195414	4.58223	cg30052930	45781879	ACCAAATACTCCTAAATCTACCTATAACAAAATATCTACTACTAAATCTC						cg	R	B	C	II	1	11	101668154	Mus musculus	mm10	CCAaaTaCTCCTAaaTCTaCCTaTaACAAAaTATCTACTaCTAaaTCTCr	TTGCTCCTGAGACCAGGTGCTCCTAGGTCTGCCTGTGACAAAGTATCTACTGCTAGGTCT[CG]CTCTACCCAGGACCGGGAAGAGTCTTTCTGGCTCCATCAGCGCTTCCCTAGTAGTGTTCA	TTGCTCCTGAGACCAGGTGCTCCTAGGTCTGCCTGTGACAAAGTATCTACTGCTAGGTCT[CG]CTCTACCCAGGACCGGGAAGAGTCTTTCTGGCTCCATCAGCGCTTCCCTAGTAGTGTTCA	GRCm10														chr11:101665482-101665851	FALSE	.	.	.	.	.	.	.
0.823168	-0.289299	7.02765	4.08519e-06	0.00195458	4.58044	cg47832419	8716346	AAAATAAAAACCACAAACCAACCCAACCAATTTTCACTATATAAATATCA	78661331	AAAATAAAAACCGCAAACCGACCCGACCGATTTTCGCTATATAAATATCG	T	Red	R	cg	R	B	C	I	1	X	94122685	Mus musculus	mm10	aAaaTaAAaaCCrCAaaCCraCCCraCCrATTTTCrCTATaTAAATATCr	GGCTGCAGGCATGAGGTGAAGGCCGCAGGCCGGCCCGGCCGATTTTCGCTATGTAAATAT[CG]GCGAGGGGGGGGGGAAGAGGGACGGGGGACAAGATGGCGGCCGGCCGGCGCCTGCTGCAG	GGCTGCAGGCATGAGGTGAAGGCCGCAGGCCGGCCCGGCCGATTTTCGCTATGTAAATAT[CG]GCGAGGGGGGGGGGAAGAGGGACGGGGGACAAGATGGCGGCCGGCCGGCGCCTGCTGCAG	GRCm10			chrX:94122087-94123678	chrX	94122087	94123678	1591	180	1109	22.6	69.7	0.94			FALSE	Zfx	NM_001044386.1	chrX	94074630	94123407	48778	-
-0.893272	-4.97744	-7.02365	4.11252e-06	0.00196437	4.57416	cg41165490	14637393	AAAAACCATCRCAATAAACATTTACCCAACAATCACTAAAATACATATTC						cg	R	B	C	II	1	4	97773021	Mus musculus	mm10	AAAACCATCrCAATAaACATTTACCCAaCAATCACTAAAaTaCATATTCr	CATCTTTAAAAGAAAACCATCGCAATAGACATTTACCCAGCAATCACTAAAGTGCATATT[CG]AGCTAGAAAAATTTTAAAGTCTTAACCATTAAGCATAAACATTCTACCGTTGTTTATATA	CATCTTTAAAAGAAAACCATCGCAATAGACATTTACCCAGCAATCACTAAAGTGCATATT[CG]AGCTAGAAAAATTTTAAAGTCTTAACCATTAAGCATAAACATTCTACCGTTGTTTATATA	GRCm10													chr4:97772046-97772411		FALSE	Nfia	NM_001122952.1	chr4	97581942	98118876	536935	+
-0.652239	-4.58245	-7.02083	4.13184e-06	0.00197031	4.56974	cg33959072	45651225	AACTTCATTTCCCACAATTCTTCCTATACTTCCAACATAACCCAATAACA	68741867	AACTTCATTTCCCACAATTCTTCCTATACTTCCGACGTAACCCAATAACG	T	Red	R	cg	R	B	C	I	1	16	17722925	Mus musculus	mm10	aACTTCATTTCCCACAATTCTTCCTaTACTTCCraCrTaaCCCAaTAaCr	ATACAAAAGCAAGACTTCATTTCCCACAATTCTTCCTGTACTTCCGGCGTGGCCCAGTAG[CG]GGATCGCTCGGCTTCCGGGTTCGGGCCTGTCGCTGTGGTAGAGGCGGCGGCGCCGGGGGT	ATACAAAAGCAAGACTTCATTTCCCACAATTCTTCCTGTACTTCCGGCGTGGCCCAGTAG[CG]GGATCGCTCGGCTTCCGGGTTCGGGCCTGTCGCTGTGGTAGAGGCGGCGGCGCCGGGGGT	GRCm10			chr16:17722635-17722942	chr16	17722635	17722942	307	32	216	20.8	70.4	0.9			FALSE	Med15	NM_001285884.1	chr16	17651207	17722947	71741	-
0.487307	0.0341151	7.01666	4.16067e-06	0.00197659	4.56319	cg41717257	23669128	AAATACTCTAATAAATACTAAATACTTTTACATCACTATAATCCCTATAC						cg	R	B	C	II	1	4	150453470	Mus musculus	mm10	AaTaCTCTaaTaAATaCTaAaTACTTTTaCATCACTATAATCCCTaTACr	CGTCCCCATCAAAGTGCTCTGGTGAATGCTGAGTACTTTTGCATCACTATAATCCCTGTA[CG]GTCAGGAAGATCAGAAGTTCATGATCATTCTCAAATCCTCTCTACTAACATCATCAAGTG	CGTCCCCATCAAAGTGCTCTGGTGAATGCTGAGTACTTTTGCATCACTATAATCCCTGTA[CG]GTCAGGAAGATCAGAAGTTCATGATCATTCTCAAATCCTCTCTACTAACATCATCAAGTG	GRCm10															FALSE	Rere	NM_001085492.1	chr4	150281915	150621966	340052	+
0.455678	-1.49089	7.01616	4.16415e-06	0.00197659	4.5624	cg40351406	90616851	CCTAACRATACTCTAAAACATAATTCACAACCCCTTTATAATTACTAACC						cg	F	T	C	II	1	3	132876485	Mus musculus	mm10	CTAACrATaCTCTaaaACATaaTTCACAaCCCCTTTaTAATTaCTaaCCr	TACATCCCAGGGCCTCCAGGGAATTCCCTGGATCACTGGAGCAAGACAGGGAAAGAAAAG[CG]GCCAGCAATTACAAAGGGGCTGTGAACCATGTCCCAGAGCATCGTTAGGTTTCTGGAATC	TACATCCCAGGGCCTCCAGGGAATTCCCTGGATCACTGGAGCAAGACAGGGAAAGAAAAG[CG]GCCAGCAATTACAAAGGGGCTGTGAACCATGTCCCAGAGCATCGTTAGGTTTCTGGAATC	GRCm10															FALSE	Gm29811	NR_102297.1	chr3	132842201	132878596	36396	-
0.558037	0.670668	7.01593	4.16573e-06	0.00197659	4.56204	cg46914735	13802825	CAAATAAAATTTTCAACAATACTAAATTCAAAAAATAACCCCATATCTTC						cg	R	B	C	II	1	9	69110656	Mus musculus	mm10	AAaTaAaaTTTTCAACAaTaCTaAATTCAAAaAaTaACCCCATATCTTCr	AGCCAAGCCAGCAAGTGAGGTTTTCAACAGTGCTGAATTCAAAGAGTGACCCCATATCTT[CG]CACAAGCCCAGGAACGAAAACTTTTCAAAACTCAGCCCCAGCGAGACTCTCCTGGGAGAG	AGCCAAGCCAGCAAGTGAGGTTTTCAACAGTGCTGAATTCAAAGAGTGACCCCATATCTT[CG]CACAAGCCCAGGAACGAAAACTTTTCAAAACTCAGCCCCAGCGAGACTCTCCTGGGAGAG	GRCm10															FALSE	Rora	NM_013646.2	chr9	68653785	69388246	734462	+
0.615122	0.41906	7.01363	4.18177e-06	0.00198091	4.55842	cg33159204	50723116	TTCTACRCCCACTTTTCTCATACAATTCCTCATTATTAAACTTTATCAAC						cg	F	T	C	II	1	15	25690478	Mus musculus	mm10	TCTACrCCCACTTTTCTCATaCAaTTCCTCATTATTAAaCTTTaTCAaCr	TCTGGAGTCTGGGCTAAAGAGGCCAGGACAAAAAGACCATCATGGGCTTTTTGTTAGACA[CG]CTGACAAAGCTTAATAATGAGGAACTGCATGAGAAAAGTGGGCGTAGAAGTCAGCCTCCA	TCTGGAGTCTGGGCTAAAGAGGCCAGGACAAAAAGACCATCATGGGCTTTTTGTTAGACA[CG]CTGACAAAGCTTAATAATGAGGAACTGCATGAGAAAAGTGGGCGTAGAAGTCAGCCTCCA	GRCm10															FALSE	Myo10	NM_019472.2	chr15	25622549	25813671	191123	+
0.488179	0.289098	7.01087	4.20108e-06	0.00198648	4.55408	cg46442619	26741963	AACTACAAATACTAATCACCRTAATCTATACTAAAATTAAAACCAATAAC						cg	R	B	C	II	1	9	14203266	Mus musculus	mm10	aCTaCAAaTACTaATCACCrTaaTCTaTACTaaAaTTaAAACCAATAACr	TCCCAGTTGCTGGCTGCAAGTACTGATCACCGTGGTCTGTACTGGAGTTGAAACCAATAA[CG]AACCAAATAAAAACCAATGTGCCTTTTATGATCAGCCTGCAGCAGGAATTCTTCACAAAG	TCCCAGTTGCTGGCTGCAAGTACTGATCACCGTGGTCTGTACTGGAGTTGAAACCAATAA[CG]AACCAAATAAAAACCAATGTGCCTTTTATGATCAGCCTGCAGCAGGAATTCTTCACAAAG	GRCm10															FALSE	.	.	.	.	.	.	.
0.724138	-0.805923	7.00968	4.20941e-06	0.00198648	4.55221	cg41838068	93629844	TTCTCCCRAAACTATATCAATTAAATCAAATATATTACACCTTCTCCTCC						cg	F	T	C	II	1	5	8045908	Mus musculus	mm10	TCTCCCraAaCTaTATCAaTTaAATCAaaTaTaTTACACCTTCTCCTCCr	AAGGTTGTTTTAATTTCTGGAAATCTCAAGCTGGAATGACTTACATTGTTAGAAACTGTA[CG]GAGGAGAAGGTGTAACACACCTGATTCAACTGATACAGCTCCGGGAGAACAAGGCCAAGG	AAGGTTGTTTTAATTTCTGGAAATCTCAAGCTGGAATGACTTACATTGTTAGAAACTGTA[CG]GAGGAGAAGGTGTAACACACCTGATTCAACTGATACAGCTCCGGGAGAACAAGGCCAAGG	GRCm10															FALSE	Sri	NM_025618.3	chr5	8045877	8046077	201	+
0.471967	-0.347615	7.00847	4.21788e-06	0.00198648	4.55032	cg33853997	95715389	ACTAACATCAACAAACAAAATACCTCTTACTATAAAAACAATCTAATAAC						cg	R	B	C	II	1	16	4036946	Mus musculus	mm10	CTaACATCAACAaACAAaaTaCCTCTTACTaTAAAAACAaTCTaATAACr	TGATAGCACGTGCTGACATCAACAGACAAGGTGCCTCTTACTGTAAAAACAGTCTGATAA[CG]TGTTTGTGCATGGTTATAAAACCTTGTGTCCTTTGCCCATCCTGCCCTCACTACCAGGGG	TGATAGCACGTGCTGACATCAACAGACAAGGTGCCTCTTACTGTAAAAACAGTCTGATAA[CG]TGTTTGTGCATGGTTATAAAACCTTGTGTCCTTTGCCCATCCTGCCCTCACTACCAGGGG	GRCm10															FALSE	Dnase1	NM_010061.5	chr16	4036944	4037144	201	+
0.599272	-0.425726	7.00799	4.2213e-06	0.00198648	4.54955	cg36300010	65675340	CATAAATCAAACAAACCTCAATAAAAACAAATATTAAACTATAACTACCC						cg	F	T	C	II	1	19	29743790	Mus musculus	mm10	ATaAATCAAACAAaCCTCAaTaAAAaCAAATaTTAAACTaTAACTaCCCr	ATGAGCACTACAATCATTTTGGTTCTTATATAAATAGGCAGCATTGTTACGTGTCTGTTA[CG]GGCAGTTACAGTTTAACATTTGCTTTCACTGAGGCTTGTTTGATTCATGATTTTCATTTG	ATGAGCACTACAATCATTTTGGTTCTTATATAAATAGGCAGCATTGTTACGTGTCTGTTA[CG]GGCAGTTACAGTTTAACATTTGCTTTCACTGAGGCTTGTTTGATTCATGATTTTCATTTG	GRCm10															FALSE	9930021J03Rik	NM_172836.3	chr19	29714401	29806009	91609	-
0.474667	-1.06759	7.00604	4.23507e-06	0.00198698	4.54648	cg36287606	94791169	ACAATTTTACTAAACTAACTAACTTCATAAAAACCATAACTCACATAACC						cg	F	T	C	II	1	19	28623885	Mus musculus	mm10	CAaTTTTaCTaaACTAaCTAACTTCATaaaaACCATaACTCACATaaCCr	CTGAGTCAGAGCTTTGGCTGCAAGCCTTGCTGGATCCACAGCCATGAGGCAGGAGAACGT[CG]GCCATGTGAGTCATGGTCCCCATGAAGTTAGCTAGTCCAGCAAAACTGCAGCGAGACGGT	CTGAGTCAGAGCTTTGGCTGCAAGCCTTGCTGGATCCACAGCCATGAGGCAGGAGAACGT[CG]GCCATGTGAGTCATGGTCCCCATGAAGTTAGCTAGTCCAGCAAAACTGCAGCGAGACGGT	GRCm10															FALSE	Glis3	NM_175459.6	chr19	28258850	28680077	421228	-
-0.738979	-5.00868	-7.00587	4.23626e-06	0.00198698	4.54622	cg40061624	13724434	AAATATAACCACTTAACATCTACAAACCAAAATCACAAAAATATAACCCA	67781276	AAATATAACCACTTAACGTCTACAAACCGAAATCGCAAAAATATAACCCG	A	Red	R	cg	F	T	C	I	1	3	96268700	Mus musculus	mm10	AAaTATaaCCACTTaaCrTCTaCAAaCCrAAaTCrCAAAAATATaaCCCr	GTGGCCAGCTGCTTGCGCGGGGCCTTGCCGCCGGTGGACTTGCGGGCGGTCTGCTTCGTA[CG]GGCCATATTTTTGCGACTTCGGCTTGCAGACGCCAAGTGGCCATACTTATAGACTTATCT	GTGGCCAGCTGCTTGCGCGGGGCCTTGCCGCCGGTGGACTTGCGGGCGGTCTGCTTCGTA[CG]GGCCATATTTTTGCGACTTCGGCTTGCAGACGCCAAGTGGCCATACTTATAGACTTATCT	GRCm10		chr3:96269676-96270106	chr3:96268667-96269107	chr3	96268667	96269107	440	54	301	24.5	68.4	1.05			FALSE	Hist2h2bb	NM_175666.2	chr3	96268199	96269499	1301	+
0.432901	0.577147	7.00372	4.25148e-06	0.00199086	4.54284	cg45588854	59602345	ACTTCCTTAACTTCAATTTCTAAAAACAAACAAACACATTTATAAACTAC						cg	F	T	C	II	1	8	36599471	Mus musculus	mm10	CTTCCTTaaCTTCAATTTCTAaAaACAAACAaACACATTTaTaAaCTACr	GTGTTCTACTGGTCTGCTAGAATGAGTTCATTATTGCAGGAGAACCACGTCGGGGGATAA[CG]TAGCTCACAAATGTGTCTGTTTGTCTCTAGAAATTGAAGCCAAGGAAGCTTGCGACTGGC	GTGTTCTACTGGTCTGCTAGAATGAGTTCATTATTGCAGGAGAACCACGTCGGGGGATAA[CG]TAGCTCACAAATGTGTCTGTTTGTCTCTAGAAATTGAAGCCAAGGAAGCTTGCGACTGGC	GRCm10															FALSE	Dlc1	NM_015802.3	chr8	36567738	36613943	46206	-
0.864314	-3.40112	6.99829	4.29017e-06	0.00200569	4.5343	cg47346545	5614138	CAACCAAACCTCATCCTCCTTAAAATTAATCACCTAAATAATAATAACCA	71781959	CGACCGAACCTCATCCTCCTTAAAATTAATCACCTAAATAATAATAACCG	T	Red	R	cg	F	T	C	I	1	9	118926872	Mus musculus	mm10	CrACCraaCCTCATCCTCCTTaaaaTTaaTCACCTaaaTaATaATaaCCr	CCTAGCCTGCGGGGGGCCGGGCCTGCGGGCGGCCGGCGCGGCGCGCACCCATGGACGGTC[CG]GCCATCATCACCCAGGTGACCAACCCCAAGGAGGATGAGGCCCGGTCGCCCGTCGCGGGC	CCTAGCCTGCGGGGGGCCGGGCCTGCGGGCGGCCGGCGCGGCGCGCACCCATGGACGGTC[CG]GCCATCATCACCCAGGTGACCAACCCCAAGGAGGATGAGGCCCGGTCGCCCGTCGCGGGC	GRCm10			chr9:118925842-118927072	chr9	118925842	118927072	1230	101	664	16.4	54	1.17	chr9:118925209-118925491		TRUE	Ctdspl	NM_133710.3	chr9	118926535	119044119	117585	+
0.604556	-1.11969	6.99689	4.30024e-06	0.00200665	4.53209	cg31420670	43626821	TATAACAAAATACACCAACATTTTTTTCACAATAACACACAATTTAAAAC						cg	F	T	C	II	1	13	34055379	Mus musculus	mm10	aTaaCAaAATACACCAACATTTTTTTCACAaTaaCACACAATTTAaaACr	AGCTTCACTCAGCTGTGTTCTGAAATTGTTAATGGAAAATTCCAGAGTAATCAATCCTTA[CG]TCCTAAATTGTGTGCCACTGTGAAAAAAATGTTGGTGTATTCTGCCACACCTGATGCTGC	AGCTTCACTCAGCTGTGTTCTGAAATTGTTAATGGAAAATTCCAGAGTAATCAATCCTTA[CG]TCCTAAATTGTGTGCCACTGTGAAAAAAATGTTGGTGTATTCTGCCACACCTGATGCTGC	GRCm10															FALSE	Bphl	NM_026512.1	chr13	34037640	34074074	36435	+
-0.557376	0.366819	-6.99605	4.30624e-06	0.00200665	4.53077	cg29954991	26615964	CTACRATTAAAACCTAAACTACTATAAATCTATATTCCACCTAACTACTC						cg	R	B	C	II	1	11	94584693	Mus musculus	mm10	TACrATTAaAaCCTaaACTACTaTaaaTCTaTaTTCCACCTaaCTaCTCr	GCTGGCTCATCCTACGATTAGAGCCTGGACTACTGTGGGTCTGTGTTCCACCTGGCTGCT[CG]GGAGGTGAAATGCAGGGATCTTGACTACCCCGGGGGTGGGAAAGCTCAGTCTGAGATGTG	GCTGGCTCATCCTACGATTAGAGCCTGGACTACTGTGGGTCTGTGTTCCACCTGGCTGCT[CG]GGAGGTGAAATGCAGGGATCTTGACTACCCCGGGGGTGGGAAAGCTCAGTCTGAGATGTG	GRCm10															FALSE	Acsf2	NM_153807.2	chr11	94557101	94601786	44686	-
0.766387	0.825073	6.9875	4.3682e-06	0.0020199	4.5173	cg31964392	72794458	ATTACCACTATCTCTCTTTTATTACCAAAAAAACRATCACAATAAAAAAC						cg	F	T	C	II	1	13	98656342	Mus musculus	mm10	TTaCCACTaTCTCTCTTTTaTTaCCAAaaaAACraTCACAaTaaAAaaCr	TGTTCCTTGCCTCTTCTCAACTTGGAAAACAAGAAGCATCAGAGAGCTCGCTGGGAGAAG[CG]CCTTCCACTGTGACCGTTCCCTTGGCAACAAAAGAGAGACAGTGGCAATGGCAAACAGAA	TGTTCCTTGCCTCTTCTCAACTTGGAAAACAAGAAGCATCAGAGAGCTCGCTGGGAGAAG[CG]CCTTCCACTGTGACCGTTCCCTTGGCAACAAAAGAGAGACAGTGGCAATGGCAAACAGAA	GRCm10															FALSE	.	.	.	.	.	.	.
0.543196	1.04865	6.98734	4.36936e-06	0.0020199	4.51705	cg44885357	48784371	TAAAAATTTCTACATATACTTTATCTTCTAAAATACATTCCTACCAACTC						cg	R	B	C	II	1	7	97624089	Mus musculus	mm10	AAaAaTTTCTACATATaCTTTATCTTCTaaAATaCATTCCTaCCAACTCr	CATCTTTTCCCTAAGAGTTTCTACATATGCTTTATCTTCTGGAATGCATTCCTGCCAACT[CG]GGTTCCTCGCAAACTTGCTTACTTATCCCTTTTAAGCCTCAGCGTGAGTCTTACTGTCTC	CATCTTTTCCCTAAGAGTTTCTACATATGCTTTATCTTCTGGAATGCATTCCTGCCAACT[CG]GGTTCCTCGCAAACTTGCTTACTTATCCCTTTTAAGCCTCAGCGTGAGTCTTACTGTCTC	GRCm10															FALSE	Rsf1	NM_001081267.2	chr7	97579895	97692782	112888	+
0.728694	0.778198	6.98611	4.37838e-06	0.0020199	4.51511	cg34088503	60797934	AAACAATCAAAACCAAAAACAATAATTACTATCAACATATCATATACACC						cg	F	T	C	II	1	16	32541781	Mus musculus	mm10	aaCAATCAAAaCCAaAAaCAaTAATTACTaTCAACATaTCATaTaCACCr	TTATCCAAGAGGATAGTAAAATACATTAGGGCCAAAGATAAAAATCCTCTGGCCCATTAC[CG]GTGCACATGACATGTTGACAGTAATTACTGCTTCTGGCTTTGATTGCCCAAGCACCTATG	TTATCCAAGAGGATAGTAAAATACATTAGGGCCAAAGATAAAAATCCTCTGGCCCATTAC[CG]GTGCACATGACATGTTGACAGTAATTACTGCTTCTGGCTTTGATTGCCCAAGCACCTATG	GRCm10															FALSE	.	.	.	.	.	.	.
1.77693	-3.19597	6.98597	4.3794e-06	0.0020199	4.51489	cg48116818	10760214	ATAATAAACCAATTCATACTTCCCAAAATACATAAACATAAACATTAACA	61730385	ATAATAAACCGATTCGTACTTCCCGAAATACATAAACGTAAACATTAACG	T	Red	R	cg	R	B	C	I	1	X	152769492	Mus musculus	mm10	aTaaTaaaCCraTTCrTaCTTCCCraAaTaCATaaaCrTaaaCATTAaCr	GGAGGCTCCTAGGTGGTGGGCCGGTTCGTGCTTCCCGGAGTGCATGGGCGTGGGCATTAG[CG]GGTGGAAGGGCTGAGTGTGGAGGGGCTGAGCGCCCCGCGTCATGGAGGGCGCCGAGCCCC	GGAGGCTCCTAGGTGGTGGGCCGGTTCGTGCTTCCCGGAGTGCATGGGCGTGGGCATTAG[CG]GGTGGAAGGGCTGAGTGTGGAGGGGCTGAGCGCCCCGCGTCATGGAGGGCGCCGAGCCCC	GRCm10			chrX:152769164-152770081	chrX	152769164	152770081	917	87	596	19	65	0.9			FALSE	Shroom2	NM_172441.3	chrX	152769486	152769686	201	-
1.03443	-1.67352	6.98569	4.38146e-06	0.0020199	4.51445	cg29763974	4670422	CATCTCAAAAACAAATTTATACAAATAACCCTTTCCTCTCCTTCCTAACA	3668911	CATCTCAAAAACAAATTTATACGAATAACCCTTTCCTCTCCTTCCTAACG	A	Red	R	cg	F	T	C	I	1	11	75297782	Mus musculus	mm10	CATCTCAAAaACAaaTTTaTaCrAaTaaCCCTTTCCTCTCCTTCCTAaCr	CAGAGTTAACTGGAAGGGTTAATAATAAAACCAGTCTGGGAGACTAAGGTTACCCAACCA[CG]CTAGGAAGGAGAGGAAAGGGCCACTCGCACAAACCTGTCTTTGAGATGAAGAACAATCAA	CAGAGTTAACTGGAAGGGTTAATAATAAAACCAGTCTGGGAGACTAAGGTTACCCAACCA[CG]CTAGGAAGGAGAGGAAAGGGCCACTCGCACAAACCTGTCTTTGAGATGAAGAACAATCAA	GRCm10															FALSE	.	.	.	.	.	.	.
0.617617	-2.08738	6.98519	4.38508e-06	0.0020199	4.51367	cg36526074	16642385	ATCTCCAACAAACATAAATAAAACRCACTAACATTTTCACTAACTCTAAC						cg	R	B	C	II	1	19	53852925	Mus musculus	mm10	TCTCCAaCAaaCATAAATAAAACrCACTaaCATTTTCACTaaCTCTaACr	AGGCCCAGCCCATCTCCAGCAGGCATAAATAAAACGCACTGGCATTTTCACTGGCTCTGA[CG]GAGCCTCTTTTATTTTGTGATATGGGTCTGAGCCAGTGCTAGTCTCCAGGGTTTATTAAC	AGGCCCAGCCCATCTCCAGCAGGCATAAATAAAACGCACTGGCATTTTCACTGGCTCTGA[CG]GAGCCTCTTTTATTTTGTGATATGGGTCTGAGCCAGTGCTAGTCTCCAGGGTTTATTAAC	GRCm10															FALSE	Rbm20	NM_001170847.1	chr19	53677305	53867080	189776	+
-0.574834	-4.49329	-6.98488	4.38739e-06	0.0020199	4.51317	cg34751490	38752229	ATCCTTCRATATCAACRTATCACRTACTTATTTCTCAACCATTAATAACC						cg	F	T	C	II	1	17	25833357	Mus musculus	mm10	TCCTTCraTaTCAaCrTaTCACrTaCTTaTTTCTCAaCCATTAATaaCCr	GAGGCCCGCAGATCAGACCGCTCTCGAGGGGCTTCCTCGGGAATCGGGAGGAGCTGCCTG[CG]GCCATTAATGGCTGAGAAACAAGCACGTGACACGCTGACACCGAAGGACCTTCTGCGGTT	GAGGCCCGCAGATCAGACCGCTCTCGAGGGGCTTCCTCGGGAATCGGGAGGAGCTGCCTG[CG]GCCATTAATGGCTGAGAAACAAGCACGTGACACGCTGACACCGAAGGACCTTCTGCGGTT	GRCm10	chr17:25837031-25837307		chr17:25832531-25833676	chr17	25832531	25833676	1145	103	755	18	65.9	0.83			TRUE	Stub1	NM_019719.3	chr17	25830635	25833361	2727	-
0.591199	0.603115	6.98437	4.39114e-06	0.0020199	4.51236	cg40069288	10736891	AATAAAAATCAACTACTACRATAACTAAAACTAACRACCTATTCAACAAC						cg	R	B	C	II	1	3	96829478	Mus musculus	mm10	ATAaAaATCAaCTaCTaCraTaaCTaAaaCTAaCraCCTaTTCAaCAACr	TGGGTGTGGTTGATAGAGATCAGCTGCTGCGGTGGCTGAGGCTAGCGGCCTGTTCAGCAA[CG]CCAGGCCACGGGGGAACAGCTACTGCCCAGCTGCCTTCTTGAGAGACAGAGTGTGTGAAG	TGGGTGTGGTTGATAGAGATCAGCTGCTGCGGTGGCTGAGGCTAGCGGCCTGTTCAGCAA[CG]CCAGGCCACGGGGGAACAGCTACTGCCCAGCTGCCTTCTTGAGAGACAGAGTGTGTGAAG	GRCm10															FALSE	Pdzk1	NM_021517.2	chr3	96828564	96829864	1301	+
-0.617128	-4.67387	-6.9802	4.42187e-06	0.00203077	4.50579	cg31220862	65715533	CCTATAAACTTCRACTCTTTCTATACAAATTCCAATACCTTTTTTATTAC						cg	F	T	C	II	1	13	3893681	Mus musculus	mm10	CTaTaaaCTTCraCTCTTTCTaTaCAAaTTCCAaTaCCTTTTTTATTaCr	GGGGCGCGCACCTAGGCTGCTCCGCGAGAGCCCGGAGCTGCCTGAGCTAAGCCGGTCCCT[CG]CAATAAAAAAGGCACTGGAACTTGCACAGAAAGAGCCGAAGCCCACAGGAGGCCGAGTGA	GGGGCGCGCACCTAGGCTGCTCCGCGAGAGCCCGGAGCTGCCTGAGCTAAGCCGGTCCCT[CG]CAATAAAAAAGGCACTGGAACTTGCACAGAAAGAGCCGAAGCCCACAGGAGGCCGAGTGA	GRCm10			chr13:3893449-3893682	chr13	3893449	3893682	233	24	164	20.6	70.4	0.83	chr13:3893449-3893682		FALSE	Net1	NM_019671.3	chr13	3882017	3918220	36204	-
0.623401	0.415093	6.97863	4.43345e-06	0.00203282	4.50332	cg44806617	2650189	AACAAATTTAATTAACTCRATAAATCAAATTCCTCTCCATTCTAAATACC						cg	F	T	C	II	1	7	83633134	Mus musculus	mm10	ACAAaTTTAATTaACTCraTaaATCAAATTCCTCTCCATTCTAaaTACCr	GCAACTGGCTTTATGCAATCCCACACCTCTTCTGGTGTCCCACACAGAATCCCTTCTCCT[CG]GTACCTAGAATGGAGAGGAATTTGATCCACCGAGTCAATTAAACTTGTTTATCTTAGGAT	GCAACTGGCTTTATGCAATCCCACACCTCTTCTGGTGTCCCACACAGAATCCCTTCTCCT[CG]GTACCTAGAATGGAGAGGAATTTGATCCACCGAGTCAATTAAACTTGTTTATCTTAGGAT	GRCm10													chr7:83631855-83632140		FALSE	Stard5	NM_023377.4	chr7	83632016	83642328	10313	+
0.596784	1.17133	6.97593	4.45349e-06	0.00203874	4.49907	cg46949088	50669885	ATCCCTACCCTCTACATCAAATACAACTAAAACATATTACAAATTTACCA	92755529	ATCCCTACCCTCTACATCAAATACGACTAAAACGTATTACAAATTTACCG	A	Red	R	cg	F	T	C	I	1	9	72750823	Mus musculus	mm10	ATCCCTACCCTCTaCATCAAATaCraCTaAaaCrTaTTACAaaTTTaCCr	AAAAATGTTTTAAGTTTGCAATTCCTAGTAGGAAAACATTATGTGCATGAACACTCTTAA[CG]GCAAACCTGTAACACGCCTCAGCCGCATTTGATGCAGAGGGTAGGGATTAATCTCAAAGC	AAAAATGTTTTAAGTTTGCAATTCCTAGTAGGAAAACATTATGTGCATGAACACTCTTAA[CG]GCAAACCTGTAACACGCCTCAGCCGCATTTGATGCAGAGGGTAGGGATTAATCTCAAAGC	GRCm10															FALSE	.	.	.	.	.	.	.
0.928251	2.01822	6.97361	4.47082e-06	0.00204292	4.49541	cg45946288	44731258	TTAACTTAACACAATTAACRTTTACCATTCTACACRAAATTCAATAATTC						cg	R	B	C	II	1	8	86594124	Mus musculus	mm10	TAaCTTaaCACAaTTAACrTTTACCATTCTaCACrAaATTCAaTAATTCr	CCAGCCAGGGTTTAGCTTGGCACAGTTAACGTTTACCATTCTGCACGAGATTCAGTAATT[CG]GCGAGGAATGTATTGTCTGTAATGTACATTGTTGGCAGGTGTGTGACTTGGAACCATTCT	CCAGCCAGGGTTTAGCTTGGCACAGTTAACGTTTACCATTCTGCACGAGATTCAGTAATT[CG]GCGAGGAATGTATTGTCTGTAATGTACATTGTTGGCAGGTGTGTGACTTGGAACCATTCT	GRCm10															FALSE	.	.	.	.	.	.	.
0.554487	0.0915586	6.96841	4.50993e-06	0.00204292	4.48719	cg28557939	45707405	TAACCTTTACCCTCTAATATTTACTAACTCTACCTCATACTTACCAATAC						cg	F	T	C	II	1	10	63403870	Mus musculus	mm10	aACCTTTaCCCTCTaaTaTTTaCTaACTCTaCCTCATaCTTaCCAATaCr	TCAGTAGAAATATCCAGTGATGGGCTAGAGACAGGGACTAAGAGGCAAAGAGGAGAGAAA[CG]CATTGGCAAGCATGAGGCAGAGTCAGCAAACACCAGAGGGCAAAGGTCACGAACACTCCT	TCAGTAGAAATATCCAGTGATGGGCTAGAGACAGGGACTAAGAGGCAAAGAGGAGAGAAA[CG]CATTGGCAAGCATGAGGCAGAGTCAGCAAACACCAGAGGGCAAAGGTCACGAACACTCCT	GRCm10															FALSE	Dnajc12	NM_001253685.1	chr10	63382442	63408840	26399	+
0.579808	0.477969	6.96824	4.51116e-06	0.00204292	4.48693	cg42110209	62741313	AATCTTTTCCACTTTCCCTACTCRACACAAACATTAACAAAAAAACTATC						cg	R	B	C	II	1	5	46182597	Mus musculus	mm10	ATCTTTTCCACTTTCCCTACTCrACACAaaCATTaaCAAAaAaACTATCr	TGCTATCTTCTGATCTTTTCCACTTTCCCTACTCGACACAGGCATTGGCAAAGAGACTAT[CG]CTAATGAAGTTGAGCCGACTTCATAACCCCTGATGATCTGGCGTGCTGTTCTATGGCTGA	TGCTATCTTCTGATCTTTTCCACTTTCCCTACTCGACACAGGCATTGGCAAAGAGACTAT[CG]CTAATGAAGTTGAGCCGACTTCATAACCCCTGATGATCTGGCGTGCTGTTCTATGGCTGA	GRCm10															FALSE	.	.	.	.	.	.	.
0.528728	0.0775501	6.96745	4.51715e-06	0.00204292	4.48568	cg45169288	56675462	CCTCTATTTACACTCCTAAACTTTATACACTTCTTTAAATAATATCACCC						cg	F	T	C	II	1	7	130904885	Mus musculus	mm10	CTCTaTTTaCACTCCTaaACTTTaTaCACTTCTTTAAaTaaTATCACCCr	GGCTCGCTTTTGACAGGAAATGTCCTGCGTGTGCTTTTTTGCTAGGAGAAGGAACCTCTG[CG]GGTGATACCACTTAAAGAAGTGCACAAAGTCCAGGAGTGCAAACAGAGGTAAGGAAGGAC	GGCTCGCTTTTGACAGGAAATGTCCTGCGTGTGCTTTTTTGCTAGGAGAAGGAACCTCTG[CG]GGTGATACCACTTAAAGAAGTGCACAAAGTCCAGGAGTGCAAACAGAGGTAAGGAAGGAC	GRCm10															FALSE	Plekha1	NM_133942.2	chr7	130865909	130913302	47394	+
0.496304	-0.234555	6.96697	4.52082e-06	0.00204292	4.48491	cg29929138	10717488	AACCTCACAATAAATAAAAACTACTATATACCTAAAAAACTCCAAAAAAC						cg	F	T	C	II	1	11	90733768	Mus musculus	mm10	ACCTCACAaTaAaTAaAAaCTaCTaTaTACCTaaAAaACTCCAaaaaaCr	AGAAGGCTTTTTGTGACCCATGAAATGTTCACTCCCTCTGAAACCCAAGGAGACATGAAG[CG]CCCCCTGGAGTCTTCCAGGTACACAGCAGCTTCTACTCACTGTGAGGTTCTGGGGCTCGC	AGAAGGCTTTTTGTGACCCATGAAATGTTCACTCCCTCTGAAACCCAAGGAGACATGAAG[CG]CCCCCTGGAGTCTTCCAGGTACACAGCAGCTTCTACTCACTGTGAGGTTCTGGGGCTCGC	GRCm10															FALSE	.	.	.	.	.	.	.
0.531359	-1.61142	6.96687	4.52154e-06	0.00204292	4.48476	cg29511415	63629327	ACCAATTTTTCTAAAACTAAACACTCAAACCCAACAACAATCTCTTATCC						cg	F	T	C	II	1	11	50355123	Mus musculus	mm10	CCAaTTTTTCTaaAACTAAaCACTCAAaCCCAaCAaCAATCTCTTaTCCr	TACTGGAACCTTTAAATGGATATGCCCAGTGAAAGCAATGAGGGCCCTGGGGCTACTACA[CG]GACAAGAGATTGCTGCTGGGCTTGAGTGCTTAGTTCCAGAAAAACTGGCTTACAGAGTGA	TACTGGAACCTTTAAATGGATATGCCCAGTGAAAGCAATGAGGGCCCTGGGGCTACTACA[CG]GACAAGAGATTGCTGCTGGGCTTGAGTGCTTAGTTCCAGAAAAACTGGCTTACAGAGTGA	GRCm10	chr11:50359091-50359865														FALSE	.	.	.	.	.	.	.
0.977093	0.55195	6.96659	4.52364e-06	0.00204292	4.48433	cg29906530	51715383	CTTATAATATTACCATTCTAAACTCTCTAATTAAAATCATTCTATCTACA	92808839	CTTATAATATTACCATTCTAAACTCTCTAATTAAAATCATTCTATCTACG	A	Red	R	cg	F	T	C	I	1	11	88639141	Mus musculus	mm10	CTTaTaaTaTTaCCATTCTaaaCTCTCTAATTaaaaTCATTCTaTCTaCr	TCCTCTGCTTCCAGCAACGGTGTTGGTAAAAAAAACTGCAGGACATCCCAGTTACAGTCA[CG]CAGACAGAATGACCCCAATTAGAGAGCCCAGAATGGCAACACCACAAGTGGAAAAGTCAG	TCCTCTGCTTCCAGCAACGGTGTTGGTAAAAAAAACTGCAGGACATCCCAGTTACAGTCA[CG]CAGACAGAATGACCCCAATTAGAGAGCCCAGAATGGCAACACCACAAGTGGAAAAGTCAG	GRCm10															FALSE	Msi2	NM_054043.3	chr11	88339381	88718229	378849	-
0.612729	1.31234	6.96654	4.52409e-06	0.00204292	4.48423	cg45136060	45610847	TATTTTCTACTACTACTCACCAAACTACTACAAACTAAACRTAACATAAC						cg	F	T	C	II	1	7	127672027	Mus musculus	mm10	aTTTTCTaCTaCTaCTCACCAAACTaCTACAAaCTAaaCrTaaCATaaCr	ACGAGGCTGCCCTGGGACTCAGCGACATGCCAGACTGCCTCTGGAGACCTTGGTGTGCAC[CG]CCATGCCACGCCTAGCTTGTAGCAGTTTGGTGAGCAGCAGCAGAAAACAGATATACTTCG	ACGAGGCTGCCCTGGGACTCAGCGACATGCCAGACTGCCTCTGGAGACCTTGGTGTGCAC[CG]CCATGCCACGCCTAGCTTGTAGCAGTTTGGTGAGCAGCAGCAGAAAACAGATATACTTCG	GRCm10															FALSE	.	.	.	.	.	.	.
0.702222	2.46969	6.96617	4.52687e-06	0.00204292	4.48365	cg29902830	40730427	CCACTTACCATACAAACCTAAAAATAATTACAAAAAAATTCAATCCATCC						cg	F	T	C	II	1	11	88353127	Mus musculus	mm10	CACTTaCCATACAaACCTaAAaaTaATTACAAAAaaaTTCAATCCATCCr	GCCCCACCCCACCCCCCTGAGTCCTTTTTTTCCGGGTCCAGGGTGATTAAATGCACCAGA[CG]GATGGATTGAACCCTTTTGTAATCACCTTCAGGTCTGTATGGCAAGTGGATTGCATTTTC	GCCCCACCCCACCCCCCTGAGTCCTTTTTTTCCGGGTCCAGGGTGATTAAATGCACCAGA[CG]GATGGATTGAACCCTTTTGTAATCACCTTCAGGTCTGTATGGCAAGTGGATTGCATTTTC	GRCm10															FALSE	Msi2	NM_054043.3	chr11	88339381	88718229	378849	-
0.648023	-2.0311	6.96154	4.56208e-06	0.0020532	4.47634	cg36703846	19792561	CTACACCCTTCAATCTATTTATAATTAAATTCAATTTACAAACATCCAAC						cg	F	T	C	II	1	1	20617303	Mus musculus	mm10	TACACCCTTCAaTCTATTTaTAATTaAATTCAATTTACAAACATCCAaCr	TTTGGGCTAGGTATGGAATCCTCGCTCCTGTTGTGCTTTTGTAGGACATGCACTTTTGAA[CG]CTGGATGTTTGTAAATTGAATTCAATTACAAATAGACTGAAGGGTGTAGGAAATTTTACA	TTTGGGCTAGGTATGGAATCCTCGCTCCTGTTGTGCTTTTGTAGGACATGCACTTTTGAA[CG]CTGGATGTTTGTAAATTGAATTCAATTACAAATAGACTGAAGGGTGTAGGAAATTTTACA	GRCm10															FALSE	Pkhd1	NM_153179.3	chr1	20057778	20618057	560280	-
0.667035	-0.953268	6.96031	4.5715e-06	0.0020532	4.4744	cg36419071	9683320	AAACAAACCCACCCAAATTCAAAAACAAAACATATTAACTACAACCTTCC						cg	F	T	C	II	1	19	43463720	Mus musculus	mm10	AACAAaCCCACCCAaATTCAaaaaCAaaACATATTAaCTACAaCCTTCCr	CAACACTCATGTGGAATCAGGAACCAGAACCAAGGCTGTGGACTTTTGGAACTGCCTCCA[CG]GAAGGCTGTAGCTAATATGTCCTGCCCCTGAATCTGGGTGGGCTTGTTCTGTACCCGAGG	CAACACTCATGTGGAATCAGGAACCAGAACCAAGGCTGTGGACTTTTGGAACTGCCTCCA[CG]GAAGGCTGTAGCTAATATGTCCTGCCCCTGAATCTGGGTGGGCTTGTTCTGTACCCGAGG	GRCm10															FALSE	Cnnm1	NM_031396.2	chr19	43440435	43497213	56779	+
0.576894	-1.96545	6.95899	4.58162e-06	0.0020532	4.47231	cg45373194	76733176	ACTTTATTTACATAAAATTACRATTACCCCAATATTTTCAAACTCAACCC						cg	F	T	C	II	1	8	11459349	Mus musculus	mm10	CTTTaTTTaCATaAAATTACrATTACCCCAaTaTTTTCAAaCTCAACCCr	ATGTTTAAAATTCACTGGACTTCATGAAGTGGAACTCAGTAACCTTTCTGGTAGCCCCTG[CG]GGTTGAGCTTGAAAACACTGGGGTAATCGTAATTTCATGCAAACAAAGTATACAGGAAGG	ATGTTTAAAATTCACTGGACTTCATGAAGTGGAACTCAGTAACCTTTCTGGTAGCCCCTG[CG]GGTTGAGCTTGAAAACACTGGGGTAATCGTAATTTCATGCAAACAAAGTATACAGGAAGG	GRCm10															FALSE	Rab20	NM_011227.1	chr8	11453976	11478499	24524	-
0.47125	-0.376713	6.958	4.58921e-06	0.0020532	4.47075	cg36118026	71609839	AAATCTATTACCCCTCTAAAAAATTCAAATATTCACCRCAAACTACAACC						cg	R	B	C	II	1	19	7105780	Mus musculus	mm10	aaTCTaTTACCCCTCTaAaaAaTTCAaATaTTCACCrCAaaCTaCAaCCr	TGTGTGTGGGGGGGTCTGTTACCCCTCTGAGGAGTTCAGATGTTCACCGCAGGCTGCAGC[CG]CCTCGCCTCTCCTCACCTCGCCTCGCACTGCTGAGCTGTCAGGCCTGTGTGCTCCGCTTT	TGTGTGTGGGGGGGTCTGTTACCCCTCTGAGGAGTTCAGATGTTCACCGCAGGCTGCAGC[CG]CCTCGCCTCTCCTCACCTCGCCTCGCACTGCTGAGCTGTCAGGCCTGTGTGCTCCGCTTT	GRCm10															FALSE	Macrod1	NM_134147.4	chr19	7056767	7198062	141296	+
0.505612	-0.725334	6.95691	4.59761e-06	0.0020532	4.46903	cg42331741	49778588	AAAATCCAACAACCAATAAACTTATCAAACRACTAATTTATCTTAAAACC						cg	F	T	C	II	1	5	77403112	Mus musculus	mm10	AaaTCCAACAaCCAATaAACTTaTCAaaCrACTaaTTTATCTTaAaACCr	CATAAATCTGCTCTTTTTGCAAGACAGAGCTATCTTAACAAAACATTACATGGACATGTC[CG]GTCTCAAGATAAACCAGTCGCCTGACAAGTTCATTGGCTGTTGGACCTCCTCTGTTTCAG	CATAAATCTGCTCTTTTTGCAAGACAGAGCTATCTTAACAAAACATTACATGGACATGTC[CG]GTCTCAAGATAAACCAGTCGCCTGACAAGTTCATTGGCTGTTGGACCTCCTCTGTTTCAG	GRCm10															FALSE	Igfbp7	NM_001159518.1	chr5	77349239	77408045	58807	-
0.431459	-0.803578	6.95542	4.60911e-06	0.0020532	4.46667	cg31954774	2750853	TAATACCACATTAAAATTTCTCAACCATAAAACTACACAACCATTAAACC						cg	F	T	C	II	1	13	97894373	Mus musculus	mm10	AATaCCACATTaAAaTTTCTCAaCCATaAAaCTACACAACCATTaAACCr	CAGTCACTTCAAGTGGCTGACCACGCATGGCTTGGGGCAGGAGAACTTTAAGTGGGACCA[CG]GTTCAATGGTTGTGTAGCTTCATGGCTGAGAAACTTCAATGTGGCATTACTTGAATTCCA	CAGTCACTTCAAGTGGCTGACCACGCATGGCTTGGGGCAGGAGAACTTTAAGTGGGACCA[CG]GTTCAATGGTTGTGTAGCTTCATGGCTGAGAAACTTCAATGTGGCATTACTTGAATTCCA	GRCm10															FALSE	.	.	.	.	.	.	.
0.466569	-0.489355	6.95537	4.6095e-06	0.0020532	4.46659	cg30861017	59715321	CATAAAACCRCTTTAACTAAACCTCTAAAACACTACCTATCTCTTACCAC						cg	F	T	C	II	1	12	80926753	Mus musculus	mm10	ATAAAACCrCTTTaaCTAaaCCTCTaaAACACTaCCTATCTCTTaCCACr	AGGGCTCTGTCTGATAATATTCTTTCTTGGTGGAAAGTCCTGCGGTAGCACAGAGCATGA[CG]TGGCAAGAGATAGGCAGTGTTCCAGAGGCCTAGCCAAAGCGGTTTTATGATTGTCTCATC	AGGGCTCTGTCTGATAATATTCTTTCTTGGTGGAAAGTCCTGCGGTAGCACAGAGCATGA[CG]TGGCAAGAGATAGGCAGTGTTCCAGAGGCCTAGCCAAAGCGGTTTTATGATTGTCTCATC	GRCm10															FALSE	.	.	.	.	.	.	.
0.661557	0.247427	6.95495	4.61269e-06	0.0020532	4.46594	cg44109192	66629150	ACCCTTCAAATACCAACTACCATACCTCCAAATTACTAATTTATCAACTC						cg	F	T	C	II	1	6	142187582	Mus musculus	mm10	CCCTTCAAATACCAaCTACCATaCCTCCAAaTTACTaaTTTATCAACTCr	GTATGGGTACATCCTCTCCATTTATAATTTCTAAAACAGGGCAATTGCATGACCGTTGAA[CG]AGTTGATAAACCAGTAACTTGGAGGCATGGTAGCTGGTATTTGAAGGGCATTCTCCTGGT	GTATGGGTACATCCTCTCCATTTATAATTTCTAAAACAGGGCAATTGCATGACCGTTGAA[CG]AGTTGATAAACCAGTAACTTGGAGGCATGGTAGCTGGTATTTGAAGGGCATTCTCCTGGT	GRCm10															FALSE	Slco1a6	NM_023718.3	chr6	142186349	142187649	1301	-
0.949078	1.04597	6.95272	4.63003e-06	0.0020532	4.4624	cg39587078	39777391	ACCAAACAAAAAAATAACCTAAACCTATAATAACTACATCCAATACCAAC						cg	F	T	C	II	1	3	28698105	Mus musculus	mm10	CCAAaCAAAaAaaTAaCCTaaACCTaTaaTAACTaCATCCAaTaCCAaCr	GGGGTCCTTTGGCTTTGGTTTTGAGGAGGTTGGGAATCTATTTAAGGCAGTGAACTTATA[CG]CTGGCACTGGATGCAGTTACCACAGGTCCAGGCTACCTCTTTGCTTGGTCAATTACTAAT	GGGGTCCTTTGGCTTTGGTTTTGAGGAGGTTGGGAATCTATTTAAGGCAGTGAACTTATA[CG]CTGGCACTGGATGCAGTTACCACAGGTCCAGGCTACCTCTTTGCTTGGTCAATTACTAAT	GRCm10															FALSE	Slc2a2	NM_031197.2	chr3	28697902	28728361	30460	+
0.512111	-1.16123	6.95258	4.63109e-06	0.0020532	4.46218	cg41800723	73702835	CRACAATTATACCAAACAAAAATTTTCACCACATTCCRTCCAAACAAACC						cg	F	T	C	II	1	4	156084292	Mus musculus	mm10	raCAaTTaTACCAaaCAAAaaTTTTCACCACATTCCrTCCAaaCAaaCCr	CAGTCCTACCTGGTCCCTGGGGCCTCAGGTGCCTTGTGGACTAGCAGGGCTCTCTTATCA[CG]GCCTGCCTGGACGGAATGTGGTGAAAACCTTTGCCTGGTACAACTGCCGCTGCTCCACAG	CAGTCCTACCTGGTCCCTGGGGCCTCAGGTGCCTTGTGGACTAGCAGGGCTCTCTTATCA[CG]GCCTGCCTGGACGGAATGTGGTGAAAACCTTTGCCTGGTACAACTGCCGCTGCTCCACAG	GRCm10															FALSE	.	.	.	.	.	.	.
0.705568	0.373435	6.9522	4.63404e-06	0.0020532	4.46158	cg31489468	4710592	TTTCCTAAAACCCTATTTTAAAATAAATACAAACTATCAAATTACCTATC						cg	R	B	C	II	1	13	41828488	Mus musculus	mm10	TTCCTaaAaCCCTaTTTTaAAATaaaTaCAAACTaTCAaaTTACCTATCr	AACTTCATGGCTTTCCTGGAGCCCTGTTTTGAAATGGGTGCAAACTGTCAGGTTACCTAT[CG]CAGAGATTCCCTCCCACACTTATAAGGAAAGGTGCCTAAGAGCGAGATGCAAAGTCCAGC	AACTTCATGGCTTTCCTGGAGCCCTGTTTTGAAATGGGTGCAAACTGTCAGGTTACCTAT[CG]CAGAGATTCCCTCCCACACTTATAAGGAAAGGTGCCTAAGAGCGAGATGCAAAGTCCAGC	GRCm10															FALSE	Adtrp	NM_175417.4	chr13	41763147	41847488	84342	-
-0.601675	-4.8692	-6.95183	4.63693e-06	0.0020532	4.46099	cg39436215	54749834	CTAAACRAATAAATCCCTAATTCTCTCCCCAAAAAACACRACACAAAATC						cg	R	B	C	II	1	2	181521130	Mus musculus	mm10	TAAACrAATaAaTCCCTAATTCTCTCCCCAAAaAaCACrACACAAAATCr	CAAGTTGGAGCCTAAACGAATGAGTCCCTAATTCTCTCCCCAAAGAGCACGACACAAAAT[CG]CCTCTTAAAATGTCGTCCCTAGGTATATAAACTAGGGGTTTTTTTATACATCAAATGCCT	CAAGTTGGAGCCTAAACGAATGAGTCCCTAATTCTCTCCCCAAAGAGCACGACACAAAAT[CG]CCTCTTAAAATGTCGTCCCTAGGTATATAAACTAGGGGTTTTTTTATACATCAAATGCCT	GRCm10													chr2:181520214-181520976		FALSE	Dnajc5	NM_016775.3	chr2	181520484	181552880	32397	+
0.907624	1.10462	6.95105	4.64295e-06	0.0020532	4.45977	cg43216751	31624834	CCTTATAATTTTCACTATTTTAATTTTCTTACCACTCCCTCTCATCATCC						cg	R	B	C	II	1	6	24167973	Mus musculus	mm10	CTTaTaaTTTTCACTATTTTaaTTTTCTTaCCACTCCCTCTCATCATCCr	CGCCGCTTTCTCCTTGTGGTTTTCACTATTTTGGTTTTCTTGCCACTCCCTCTCATCATC[CG]CACCAAGGTAAGCAAGCTTGGAGCACACACAGGCACATGGCTTGGGCTGTGCCATGGGTT	CGCCGCTTTCTCCTTGTGGTTTTCACTATTTTGGTTTTCTTGCCACTCCCTCTCATCATC[CG]CACCAAGGTAAGCAAGCTTGGAGCACACACAGGCACATGGCTTGGGCTGTGCCATGGGTT	GRCm10															FALSE	Slc13a1	NM_019481.2	chr6	24088282	24168092	79811	-
0.454184	0.989225	6.94836	4.66398e-06	0.00205932	4.4555	cg41591829	9729497	AAAAATCTAACAAATATACTAAAAACTCAACCCTATATATTCACAACTCC						cg	R	B	C	II	1	4	139089451	Mus musculus	mm10	AaAaTCTaaCAaaTaTaCTaAaAaCTCAaCCCTaTaTaTTCACAaCTCCr	AGGGCAGCTGCAAGAGTCTGGCAGGTGTGCTGAGAGCTCAGCCCTGTGTGTTCACAGCTC[CG]CCCCTGGCATTCCTGAAGGGCCCTGTCAGTCAAGGGAAGCTACCACAGTGCTCTCTGCCC	AGGGCAGCTGCAAGAGTCTGGCAGGTGTGCTGAGAGCTCAGCCCTGTGTGTTCACAGCTC[CG]CCCCTGGCATTCCTGAAGGGCCCTGTCAGTCAAGGGAAGCTACCACAGTGCTCTCTGCCC	GRCm10	chr4:139092483-139093242														FALSE	Nbl1	NM_008675.2	chr4	139082291	139092970	10680	-
0.4833	-0.99898	6.94346	4.70239e-06	0.00206298	4.44776	cg40971540	58712280	AAAAAAACTTCAAAATATCCRCAACATCAAACAAATTATACTTACCCATC						cg	R	B	C	II	1	4	63171984	Mus musculus	mm10	aaAaAaCTTCAaaaTATCCrCAACATCAAACAAaTTaTACTTACCCATCr	CGCTGTCCTCTGGGAGAGCTTCAGGGTATCCGCAACATCAAACAAGTTGTACTTACCCAT[CG]GGAGACCCACGTTCCTCCATGTCTTGTAGTGGACAGGATTTCTTTCCCTTTCTAATATGC	CGCTGTCCTCTGGGAGAGCTTCAGGGTATCCGCAACATCAAACAAGTTGTACTTACCCAT[CG]GGAGACCCACGTTCCTCCATGTCTTGTAGTGGACAGGATTTCTTTCCCTTTCTAATATGC	GRCm10															FALSE	Kif12	NM_001317352.1	chr4	63165629	63172131	6503	-
0.618152	0.755535	6.94292	4.70669e-06	0.00206298	4.4469	cg40069328	67658116	CAAAAACCAAAACTTTACAATAAAAACRATAACACCTTACCTACCTAATC						cg	R	B	C	II	1	3	96832202	Mus musculus	mm10	AaAaaCCAaAaCTTTaCAATAaaAACrATaACACCTTaCCTACCTaATCr	GGGATGCCTGGCAGAGGCCAGAGCTTTGCAATAGGAACGATGACACCTTGCCTACCTGAT[CG]CTGCTGAAGATTGGCTCTAGGCTTGAATCATCTGCCGCCTGAACCTGGCTAGCAACAGAT	GGGATGCCTGGCAGAGGCCAGAGCTTTGCAATAGGAACGATGACACCTTGCCTACCTGAT[CG]CTGCTGAAGATTGGCTCTAGGCTTGAATCATCTGCCGCCTGAACCTGGCTAGCAACAGAT	GRCm10															FALSE	Pdzk1	NM_021517.2	chr3	96830064	96870926	40863	+
-0.682005	1.01286	-6.9418	4.71557e-06	0.00206298	4.44512	cg29903235	90651433	CAAAAACAAAACACTCTCAAATTAAAAAACAACAACACACAACATATCCA	48657273	CGAAAACAAAACACTCTCAAATTAAAAAACGACAACACACAACATATCCG	A	Red	R	cg	F	T	C	I	1	11	88381565	Mus musculus	mm10	CrAaAACAaaACACTCTCAaaTTAAaAaACraCAaCACACAaCATaTCCr	TAATGGCATCTTATGTTTCCCCCTGTAAGCAACTGAGGTAGAAAAATAAATTGTTTATCA[CG]GACATGCTGTGTGCTGCCGTCTCTTAACCTGAGAGTGTCCTGTTCTCGCTCCGGGGGAGG	TAATGGCATCTTATGTTTCCCCCTGTAAGCAACTGAGGTAGAAAAATAAATTGTTTATCA[CG]GACATGCTGTGTGCTGCCGTCTCTTAACCTGAGAGTGTCCTGTTCTCGCTCCGGGGGAGG	GRCm10															FALSE	Msi2	NM_054043.3	chr11	88339381	88718229	378849	-
0.632255	0.920748	6.94177	4.71576e-06	0.00206298	4.44508	cg45864685	92799496	TATTCAATTTTACCTATAATAAAAAACTCTATATTTACCRAATAAACTCC						cg	R	B	C	II	1	8	77473472	Mus musculus	mm10	aTTCAaTTTTaCCTaTaATAaAaaaCTCTaTaTTTaCCrAaTaaACTCCr	CCACACTGCCTTGTTCAGTTTTGCCTGTGATAGAGGGCTCTGTGTTTGCCGAGTGGACTC[CG]CTGCACAGTCTGCTTTCCAGTTAGCACAACTCTGTTGATTAGTTCCTTCAGGAATGGATG	CCACACTGCCTTGTTCAGTTTTGCCTGTGATAGAGGGCTCTGTGTTTGCCGAGTGGACTC[CG]CTGCACAGTCTGCTTTCCAGTTAGCACAACTCTGTTGATTAGTTCCTTCAGGAATGGATG	GRCm10															FALSE	Arhgap10	NM_030113.2	chr8	77250365	77517907	267543	-
0.680966	0.23448	6.94143	4.71844e-06	0.00206298	4.44455	cg28411324	63706848	CACTTATCTTAAAATCCACTCATAACAACTTAACCTCTATAAACTTACAC						cg	R	B	C	II	1	10	43441300	Mus musculus	mm10	ACTTATCTTaaAaTCCACTCATAACAaCTTAACCTCTaTaaaCTTACACr	TGTGACCCAGTCACTTATCTTGGAGTCCACTCATAACAGCTTAACCTCTGTGGGCTTACA[CG]TCCTCCTCACTGCAGGCCACAGGAGGGCCTGCTTCAAACTTTTGGGAGGAGGAATTCAAC	TGTGACCCAGTCACTTATCTTGGAGTCCACTCATAACAGCTTAACCTCTGTGGGCTTACA[CG]TCCTCCTCACTGCAGGCCACAGGAGGGCCTGCTTCAAACTTTTGGGAGGAGGAATTCAAC	GRCm10															FALSE	Pdss2	NM_001168289.1	chr10	43221485	43464882	243398	+
0.904436	-1.58018	6.94061	4.72498e-06	0.00206298	4.44324	cg34504321	67780375	TAAATACATTAATACAAAACAACAAAATACACAAAAACAATCTCTCTCCA	49771220	TAAATACGTTAATACAAAACGACAAAATACGCGAAAACGATCTCTCTCCG	G	Grn	G	cg	R	B	C	I	1	16	92605834	Mus musculus	mm10	TaaATaCrTTaaTaCAaaaCraCAaaATaCrCraaaaCrATCTCTCTCCr	GCGCGGCGCCGGTGGATGCGTTGGTGCAGGGCGGCAGGATGCGCGGGGGCGATCTCTCTC[CG]CCCACCATGGAGAACTGGTAGGAACCGGCCGAGGCGCCGTAGTATAGATGGTAGGAGGGC	GCGCGGCGCCGGTGGATGCGTTGGTGCAGGGCGGCAGGATGCGCGGGGGCGATCTCTCTC[CG]CCCACCATGGAGAACTGGTAGGAACCGGCCGAGGCGCCGTAGTATAGATGGTAGGAGGGC	GRCm10			chr16:92605600-92606133	chr16	92605600	92606133	533	56	372	21	69.8	0.92			FALSE	Runx1	NM_001111023.2	chr16	92601465	92697329	95865	-
1.07739	-3.40278	6.94027	4.72766e-06	0.00206298	4.44271	cg46852892	74747247	TTTAATTCTCTTTACTCCAACTTAAAATCAAAAATCCAACATACTAAACA	3724235	TTTAATTCTCTTTACTCCAACTTAAAATCGAAAATCCAACATACTAAACG	T	Red	R	cg	F	T	C	I	1	9	62858079	Mus musculus	mm10	TTTaaTTCTCTTTACTCCAaCTTaaAaTCrAAAaTCCAaCATaCTaaaCr	TTGACTCTCATGGCATAGAGCCCGGTCTCCGTGGCAGCGGAGGATTTATTACCAGGCCTC[CG]CCCAGCATGCTGGACTTTCGACTCCAAGCTGGAGTAAAGAGAACCAAACTCAGTTCCAGG	TTGACTCTCATGGCATAGAGCCCGGTCTCCGTGGCAGCGGAGGATTTATTACCAGGCCTC[CG]CCCAGCATGCTGGACTTTCGACTCCAAGCTGGAGTAAAGAGAACCAAACTCAGTTCCAGG	GRCm10															FALSE	Calml4	NM_001102468.1	chr9	62857903	62858103	201	+
0.54711	-1.85506	6.93911	4.73685e-06	0.00206298	4.44087	cg46092654	61769123	AATCCCTATCTACTAATTTTAACTTTCACAAACCCAATCTACTCAAAATC						cg	F	T	C	II	1	8	105000704	Mus musculus	mm10	ATCCCTaTCTaCTaATTTTaaCTTTCACAAaCCCAaTCTaCTCAaAaTCr	CCCTGCAGAGTGTGGGCAGGGCTCTGGGTGGGGCCTGGCAGGGTGGGTACTGCAGGAGAA[CG]ACTCTGAGCAGACTGGGCTTGTGAAAGCCAAAATCAGCAGACAGGGATTATAGACACCTC	CCCTGCAGAGTGTGGGCAGGGCTCTGGGTGGGGCCTGGCAGGGTGGGTACTGCAGGAGAA[CG]ACTCTGAGCAGACTGGGCTTGTGAAAGCCAAAATCAGCAGACAGGGATTATAGACACCTC	GRCm10															FALSE	Ces2h	NM_001272045.1	chr8	105000652	105000852	201	+
0.982551	-2.80066	6.93907	4.73715e-06	0.00206298	4.44081	cg47507523	51677119	TTACTAAAAATTTACTAACATCAAAATAAACAACAACCAATAACCAAACA	28654161	TTACTAAAAATTTACTAACATCGAAATAAACAACAACCAATAACCAAACG	A	Red	R	cg	F	T	C	I	1	X	20688181	Mus musculus	mm10	TTaCTAaAAATTTACTAaCATCrAaaTaAaCAaCAaCCAaTAaCCAaaCr	CGTTTACCACCATGGGGATGTACCAAATGAGACTGTAGGGAAAGAAGGTGGTGACTGGCA[CG]CCTGGCTACTGGCTGCTGCTCACCTCGATGCTAGTAAATTTCTAGCAAGATCAAAACTAT	CGTTTACCACCATGGGGATGTACCAAATGAGACTGTAGGGAAAGAAGGTGGTGACTGGCA[CG]CCTGGCTACTGGCTGCTGCTCACCTCGATGCTAGTAAATTTCTAGCAAGATCAAAACTAT	GRCm10		chrX:20688266-20688821													FALSE	Cdk16	NM_011049.5	chrX	20686925	20688225	1301	+
-0.718468	1.24071	-6.93655	4.75727e-06	0.00206518	4.43681	cg47236931	3764228	AATTAAAATCAAAACCTTAACCAAAATCTAACTCATAACCATAACTACCC						cg	F	T	C	II	1	9	108115705	Mus musculus	mm10	aTTaaaATCAaaACCTTaaCCAAaaTCTAaCTCATaACCATAaCTACCCr	ATAGCAGCGGAGCCCTTCAGGGAGGTCTCCGACGTTTTAAAACCATCGAGCTCAACAGCA[CG]GGTAGCTATGGTCATGAGCTAGACCTTGGCCAAGGTCCTGATCCCAACCTGGACCGGGAG	ATAGCAGCGGAGCCCTTCAGGGAGGTCTCCGACGTTTTAAAACCATCGAGCTCAACAGCA[CG]GGTAGCTATGGTCATGAGCTAGACCTTGGCCAAGGTCCTGATCCCAACCTGGACCGGGAG	GRCm10													chr9:108115255-108115488		FALSE	Bsn	NM_007567.2	chr9	108096021	108190383	94363	-
1.35865	-2.67619	6.93622	4.75987e-06	0.00206518	4.4363	cg31145951	3795495	ATAAAAACTCTATACATACTACTTTACAACCAAATACTCAAAATACTACA	52722822	ATAAAAACTCTATACGTACTACTTTACGACCAAATACTCGAAATACTACG	T	Red	R	cg	R	B	C	I	1	12	111445692	Mus musculus	mm10	aTaaAaaCTCTaTACrTaCTaCTTTaCrACCAaaTaCTCraaaTACTaCr	CGGCAGAGCAAGGTGGAGGCTCTGTACGTGCTGCTTTGCGACCAGGTGCTCGGGGTACTG[CG]GCGGCCGCTGGAGGCGGCGCCCGAGCGGCTGAGCCAGGCGCTAGCCGTGGTGTCGCAGGA	CGGCAGAGCAAGGTGGAGGCTCTGTACGTGCTGCTTTGCGACCAGGTGCTCGGGGTACTG[CG]GCGGCCGCTGGAGGCGGCGCCCGAGCGGCTGAGCCAGGCGCTAGCCGTGGTGTCGCAGGA	GRCm10			chr12:111445534-111446079	chr12	111445534	111446079	545	49	326	18	59.8	1.04		chr12:111442352-111442913	FALSE	Tnfaip2	NM_009396.2	chr12	111442660	111455018	12359	+
0.504522	-1.31003	6.93572	4.76388e-06	0.00206518	4.4355	cg44887300	88666450	AATTAAACAATATAAACTCATTTCCTTTTCCCAACTTACAAAAATAAACC						cg	R	B	C	II	1	7	97830919	Mus musculus	mm10	aTTaaACAATaTaAACTCATTTCCTTTTCCCAaCTTACAaaAATaAACCr	AGTTTAGCCTGGGTTGGACAATGTGAACTCATTTCCTTTTCCCAGCTTACAGGAATGAAC[CG]GGCTCAGGGAGGGGCCAAAGGCAAGTTGTAACAGCTCACTTTGGACTTTCTCCCCAGGAA	AGTTTAGCCTGGGTTGGACAATGTGAACTCATTTCCTTTTCCCAGCTTACAGGAATGAAC[CG]GGCTCAGGGAGGGGCCAAAGGCAAGTTGTAACAGCTCACTTTGGACTTTCTCCCCAGGAA	GRCm10															FALSE	.	.	.	.	.	.	.
0.542229	-0.808372	6.93383	4.77901e-06	0.00206528	4.43251	cg36661453	26688467	TTCACAATTCAACAACCACATACTTCTTCAACCRTAAAAAAAACTATTTC						cg	R	B	C	II	1	1	13314187	Mus musculus	mm10	TCACAaTTCAaCAaCCACATaCTTCTTCAACCrTaaAaaaAaCTaTTTCr	AACTCCAGGAGTTCACAGTTCAGCAGCCACATGCTTCTTCAACCGTGGAGGGAGCTGTTT[CG]TACACCTGAGGCCTCACACAGTGGAGGTGAAAAACACATTCTTTTTACGACAAAGAACAG	AACTCCAGGAGTTCACAGTTCAGCAGCCACATGCTTCTTCAACCGTGGAGGGAGCTGTTT[CG]TACACCTGAGGCCTCACACAGTGGAGGTGAAAAACACATTCTTTTTACGACAAAGAACAG	GRCm10															FALSE	Ncoa2	NM_001302702.1	chr1	13139104	13372429	233326	-
-0.911761	-3.95539	-6.93368	4.78022e-06	0.00206528	4.43227	cg42733306	64693267	CAAAACAATCTAAAACACAAAATAACAAACACAACCCACAAAAAAAAACA	75703444	CAAAACAATCTAAAACGCAAAATAACGAACGCGACCCGCGAAAAAAAACG	G	Grn	G	cg	R	B	C	I	1	5	121711803	Mus musculus	mm10	CAAAACAaTCTaAaaCrCAaaaTaaCrAaCrCraCCCrCraaaAaaaaCr	GGCCGTTGCTACCAAAACAGTCTGAGGCGCAGGGTGGCGAGCGCGGCCCGCGGGGAGGGG[CG]CCGGGGCCGCGCGGGGGAGGGCCGGCGGAGGGATACGCCACCGCGCCGCCCCGCCCGCCG	GGCCGTTGCTACCAAAACAGTCTGAGGCGCAGGGTGGCGAGCGCGGCCCGCGGGGAGGGG[CG]CCGGGGCCGCGCGGGGGAGGGCCGGCGGAGGGATACGCCACCGCGCCGCCCCGCCCGCCG	GRCm10			chr5:121711303-121713176	chr5	121711303	121713176	1873	170	1133	18.2	60.5	1.01			FALSE	Atxn2	NM_009125.2	chr5	121711608	121814950	103343	+
0.784157	-3.40942	6.93299	4.78575e-06	0.00206528	4.43118	cg30768353	45610440	AAAACTCAAAATTCCCAAATCCTAAATTCAAAACCCAAAATTTACTCACA	75699345	AAAACTCAAAATTCCCGAATCCTAAATTCGAAACCCGAAATTTACTCACG	A	Red	R	cg	R	B	C	I	1	12	71111405	Mus musculus	mm10	AAaaCTCAaAATTCCCrAaTCCTaaaTTCraaACCCraaaTTTaCTCACr	GTCAGGCTGGAGAAGGCTCAGAATTCCCGAGTCCTGGGTTCGGGACCCGGGGTTTGCTCA[CG]TGTGGCTGGCCCGTGCCCAACGCTCGCAGGGCAACCCAATGCCCAGCGTCCGTCTTGGCG	GTCAGGCTGGAGAAGGCTCAGAATTCCCGAGTCCTGGGTTCGGGACCCGGGGTTTGCTCA[CG]TGTGGCTGGCCCGTGCCCAACGCTCGCAGGGCAACCCAATGCCCAGCGTCCGTCTTGGCG	GRCm10			chr12:71111371-71111657	chr12	71111371	71111657	286	32	205	22.4	71.7	0.87			FALSE	Tomm20l	NM_029227.1	chr12	71111227	71111427	201	+
0.574941	-0.393874	6.93186	4.79488e-06	0.0020661	4.42938	cg29847405	2644295	AAATACAAAAATTACTTCACTAAAACCTATCTAAACRTACCTATTATATC						cg	R	B	C	II	1	11	82973945	Mus musculus	mm10	AaTaCAaaAaTTACTTCACTaAAaCCTaTCTaAaCrTaCCTaTTaTATCr	CCACAGGAATGAAGTGCAGGAGTTACTTCACTGAAGCCTGTCTGAGCGTGCCTGTTGTAT[CG]AGCTGTAACACCCTAAGGGAAGAGAATTCTCTCCCCAAGCTTCCCTTGTTGGAAGCTGCT	CCACAGGAATGAAGTGCAGGAGTTACTTCACTGAAGCCTGTCTGAGCGTGCCTGTTGTAT[CG]AGCTGTAACACCCTAAGGGAAGAGAATTCTCTCCCCAAGCTTCCCTTGTTGGAAGCTGCT	GRCm10															FALSE	.	.	.	.	.	.	.
0.463031	-0.551896	6.93017	4.80849e-06	0.00206737	4.42671	cg37165695	59679861	CTTCTCAAAAAAAACTCACRCTCAACTCTATTACTAAAATCATTAACCCC						cg	F	T	C	II	1	1	84851713	Mus musculus	mm10	TTCTCAaaaaaAaCTCACrCTCAaCTCTATTaCTaAaaTCATTaaCCCCr	TTGGTTGGAAACCTTTCAGTGCCGACTATTAGCCCAGTTCTCAGTGGGAGGTGGACCAGA[CG]GGGCCAATGACCTCAGCAATAGAGCTGAGCGTGAGCTCCCCCTGAGAAGCATGTGCTTGG	TTGGTTGGAAACCTTTCAGTGCCGACTATTAGCCCAGTTCTCAGTGGGAGGTGGACCAGA[CG]GGGCCAATGACCTCAGCAATAGAGCTGAGCGTGAGCTCCCCCTGAGAAGCATGTGCTTGG	GRCm10															FALSE	Fbxo36	NM_025386.3	chr1	84839840	84900486	60647	+
0.611264	0.799233	6.9297	4.81227e-06	0.00206737	4.42596	cg37847550	46735832	CCAATAATAACCTCATAATAAATAACRTCACAATAACACCCACATACAAC						cg	R	B	C	II	1	1	180212055	Mus musculus	mm10	CAaTaATaACCTCATaaTaAaTaaCrTCACAATaACACCCACATaCAACr	TAATTGAGTCTCCAGTGATGACCTCATGGTGAGTGGCGTCACAATGACACCCACATGCAA[CG]CAAAGTAGGAAGTCAGTGGATGCAGGAGCAGGCAGGGTCCTTTTATAGCAACTCATTCTT	TAATTGAGTCTCCAGTGATGACCTCATGGTGAGTGGCGTCACAATGACACCCACATGCAA[CG]CAAAGTAGGAAGTCAGTGGATGCAGGAGCAGGCAGGGTCCTTTTATAGCAACTCATTCTT	GRCm10															FALSE	.	.	.	.	.	.	.
0.649286	-1.70026	6.9247	4.85287e-06	0.00207913	4.41803	cg33853924	41775141	CTCAAATACCATACAATTAAACATCAACTATTCACTAATATACTAAACTC						cg	R	B	C	II	1	16	4029497	Mus musculus	mm10	TCAAATaCCATACAaTTaAACATCAACTaTTCACTaaTaTaCTaaaCTCr	GCGGCACTGATCTCAAATGCCATACAGTTGAACATCAACTGTTCACTGGTGTGCTGGGCT[CG]GCATGACTGGCCAAGCGTGACTGTGCAGCAGCTGTAGGGCTGAGCAACCCAGGTGCTGTT	GCGGCACTGATCTCAAATGCCATACAGTTGAACATCAACTGTTCACTGGTGTGCTGGGCT[CG]GCATGACTGGCCAAGCGTGACTGTGCAGCAGCTGTAGGGCTGAGCAACCCAGGTGCTGTT	GRCm10															FALSE	.	.	.	.	.	.	.
0.599492	-0.609685	6.92454	4.85419e-06	0.00207913	4.41778	cg42754608	50785469	CRCRCATACTCAATACTATAACAATCRAATAAACRACATTAACACAAACC						cg	F	T	C	II	1	5	123094654	Mus musculus	mm10	rCrCATaCTCAaTaCTaTAaCAaTCrAaTaAaCraCATTaACACAaACCr	TGGCCGACTCCCTAATGCGTCAGCACAAGGATGGGTAAACTTCCTTGGCAAAGAGCCATA[CG]GTCTGTGTCAATGCCGCTCACTCGACTGCTACAGCACTGAGCATGCGCGACGGAGCAGGA	TGGCCGACTCCCTAATGCGTCAGCACAAGGATGGGTAAACTTCCTTGGCAAAGAGCCATA[CG]GTCTGTGTCAATGCCGCTCACTCGACTGCTACAGCACTGAGCATGCGCGACGGAGCAGGA	GRCm10															FALSE	Tmem120b	NM_001039723.2	chr5	123076274	123117445	41172	+
0.689411	-1.19295	6.9228	4.86833e-06	0.00208207	4.41503	cg45297602	65756341	ACAAAAACTATAAAATACAAACTCATAAACAATATTCCTCAATAACTTAC						cg	R	B	C	II	1	7	144009286	Mus musculus	mm10	CAaAaaCTATaaAaTaCAAaCTCATAAaCAaTaTTCCTCAaTAACTTACr	CAGGAGTGGAAGCAGAGGCTATGGAGTGCAAGCTCATAAGCAGTGTTCCTCAGTAACTTA[CG]CTGCTTACGGGCTTGCTCTCCAGAGCCTGCTCAGCTTTCTTACACAACTGAAGGCCACCT	CAGGAGTGGAAGCAGAGGCTATGGAGTGCAAGCTCATAAGCAGTGTTCCTCAGTAACTTA[CG]CTGCTTACGGGCTTGCTCTCCAGAGCCTGCTCAGCTTTCTTACACAACTGAAGGCCACCT	GRCm10															FALSE	Mir3105	NR_037292.1	chr7	144009253	144009338	86	+
0.627289	1.54326	6.91899	4.89965e-06	0.00208524	4.40898	cg31576840	4673466	AATCACTAACTAAATACCTAACTAAAAACTTTTATACTCAAAAACRACCC						mu	F	T	C	II	1	13	50136721	Mus musculus	mm10	ATCACTaACTaAATACCTAACTaAAaaCTTTTaTACTCAaaaACrACCCr	NNNNNNNNNNNNNNNNNNNNNNNNNNNNNNNNNNNNNNNNNNNNNNNNNNNNNNNNNNNN[NN]NNNNNNNNNNNNNNNNNNNNNNNNNNNNNNNNNNNNNNNNNNNNNNNNNNNNNNNNNNNN	CTCAGGTCCGGAAATACAGACCTATTTCTGAAGAGCAGATTTTCGGTTTGCTCTCAGCTG[CG]GGTCGTCCCTGAGTACAAAAGCCTTCAGTTAGGTATTCAGTCAGTGATCCTTCACCTTTC	GRCm10															TRUE	.	.	.	.	.	.	.
0.608179	-1.62866	6.9184	4.90449e-06	0.00208524	4.40805	cg35834634	61675853	TTACCAAAAAACTCCAACACCTAATTAATAATCTCTAAAATAAATAACTC						cg	F	T	C	II	1	18	65025891	Mus musculus	mm10	TaCCAAaAaaCTCCAaCACCTaaTTAATaATCTCTAaaaTAAATaACTCr	GCAGGGAAGAAGTCCCCAGAGGAGGGTATGCAATTCCACTTGAGCAGTCCCAACCAGGTT[CG]AGTCATTTACCCTAGAGATCATTAACCAGGTGCTGGAGCCTCTTGGCAAGAAGCGAGAGT	GCAGGGAAGAAGTCCCCAGAGGAGGGTATGCAATTCCACTTGAGCAGTCCCAACCAGGTT[CG]AGTCATTTACCCTAGAGATCATTAACCAGGTGCTGGAGCCTCTTGGCAAGAAGCGAGAGT	GRCm10															FALSE	Nedd4l	NM_001114386.1	chr18	64887755	65217826	330072	+
0.443291	-0.04568	6.91671	4.91846e-06	0.00208524	4.40536	cg41085646	2713487	TACTTTTAAACTACRACTATACCCTCAATATAAAACAACACACATACAAC						cg	F	T	C	II	1	4	84482716	Mus musculus	mm10	ACTTTTaaACTACraCTaTaCCCTCAaTaTAAAACAACACACATaCAaCr	AGCTCCTGGATACAGATCAGAGGAGAGGTTCTGCCACAAATCACCTAGAAACATGTCAGA[CG]CTGCATGTGTGTTGTTTTACACTGAGGGCACAGCCGTAGTCCAAAAGTATTGATTCTTTT	AGCTCCTGGATACAGATCAGAGGAGAGGTTCTGCCACAAATCACCTAGAAACATGTCAGA[CG]CTGCATGTGTGTTGTTTTACACTGAGGGCACAGCCGTAGTCCAAAAGTATTGATTCTTTT	GRCm10															FALSE	Bnc2	NM_172870.4	chr4	84272541	84675086	402546	-
0.607317	-1.10867	6.91653	4.91988e-06	0.00208524	4.40509	cg29778464	40617391	AAAATTCRCACACTACTTTCAAACTACAATCRAACTAAAACAAAATATCC						cg	F	T	C	II	1	11	76437105	Mus musculus	mm10	aaATTCrCACACTaCTTTCAaaCTaCAaTCraaCTaaaaCAaaATATCCr	CTTGTGCGCTTCTCCACCTTTCTGCCCGGATCTGGCTCGGCAGGCTGGCCGCCGGCATGA[CG]GATATCCTGCCCCAGCCCGACTGCAGCCTGAAAGCAGTGTGCGAATCCCTGGAGCACTGC	CTTGTGCGCTTCTCCACCTTTCTGCCCGGATCTGGCTCGGCAGGCTGGCCGCCGGCATGA[CG]GATATCCTGCCCCAGCCCGACTGCAGCCTGAAAGCAGTGTGCGAATCCCTGGAGCACTGC	GRCm10			chr11:76436955-76437213	chr11	76436955	76437213	258	19	168	14.7	65.1	0.69			FALSE	Abr	NM_001291186.1	chr11	76416731	76468465	51735	-
0.60967	-0.546013	6.91648	4.92031e-06	0.00208524	4.40501	cg34152872	41802901	ACRACTAACTAAACATTCAATTCACAAACAAAAAACTTCTATCTTTACTC						cg	F	T	C	II	1	16	38941418	Mus musculus	mm10	CraCTaaCTaAACATTCAaTTCACAAACAaAAaaCTTCTaTCTTTaCTCr	AAGTACTGATTTCCATTTGAATATAACAGTCTTTTTACCAAAACTTTCCTATGGCTGATT[CG]AGCAAAGACAGAAGCCTTCTGTTTGTGAACTGAATGTTCAGCCAGCCGTGACGCGGCCAC	AAGTACTGATTTCCATTTGAATATAACAGTCTTTTTACCAAAACTTTCCTATGGCTGATT[CG]AGCAAAGACAGAAGCCTTCTGTTTGTGAACTGAATGTTCAGCCAGCCGTGACGCGGCCAC	GRCm10															FALSE	Igsf11	NM_170599.2	chr16	38902344	39027159	124816	+
-0.946298	-4.91807	-6.91575	4.92634e-06	0.00208524	4.40385	cg45893578	5783549	TTTTAATTCTAAAATAATTTTTCTTCTCAAACATCCAACATCACTTAACA	17614593	TTTTAATTCTAAAATAATTTTTCTTCTCAAACGTCCAACGTCACTTAACG	A	Red	R	cg	R	B	C	I	1	8	80739841	Mus musculus	mm10	TTTTAATTCTaAaaTaATTTTTCTTCTCAaaCrTCCAACrTCACTTAACr	AACACGCAGACTTTTTAATTCTGAGGTGATTTTTCTTCTCAGGCGTCCAACGTCACTTAA[CG]TCACGCCCGTGAGCGAAGGCGGCAGGACGACGAAGGCCAGCCCAGGCCTTTGCTCCTTGC	AACACGCAGACTTTTTAATTCTGAGGTGATTTTTCTTCTCAGGCGTCCAACGTCACTTAA[CG]TCACGCCCGTGAGCGAAGGCGGCAGGACGACGAAGGCCAGCCCAGGCCTTTGCTCCTTGC	GRCm10			chr8:80738420-80739970	chr8	80738420	80739970	1550	163	990	21	63.9	1.03			FALSE	Smarca5	NM_053124.2	chr8	80739659	80740959	1301	-
0.90849	-4.00392	6.91494	4.9331e-06	0.00208524	4.40256	cg38982584	7793567	AACTAAAACCAATTTAAAAAACAACTATAACTAAACTCCTTACTTCCTCA	89607527	AACTAAAACCGATTTAAAAAACGACTATAACTAAACTCCTTACTTCCTCG	T	Red	R	cg	R	B	C	I	1	2	132578153	Mus musculus	mm10	AaCTaAAACCraTTTaAaAaaCraCTaTAACTaaaCTCCTTaCTTCCTCr	TTAGTCTAGGGCAGCTGAAACCGGTTTGAGAGGCGGCTGTAACTGGGCTCCTTGCTTCCT[CG]GGCCACCTAAGGGAGCGCTGGCGAGGCGCTGACGCTCGGCTCCGTCGGCCGCGGCCCAGG	TTAGTCTAGGGCAGCTGAAACCGGTTTGAGAGGCGGCTGTAACTGGGCTCCTTGCTTCCT[CG]GGCCACCTAAGGGAGCGCTGGCGAGGCGCTGACGCTCGGCTCCGTCGGCCGCGGCCCAGG	GRCm10			chr2:132577579-132578283	chr2	132577579	132578283	704	70	453	19.9	64.3	0.96			FALSE	Gpcpd1	NM_001291051.1	chr2	132529081	132578248	49168	-
0.761428	0.465483	6.91483	4.93403e-06	0.00208524	4.40238	cg43221693	80687252	CAAAATCCTCAATTCCAATATAACTTAATTAATAATTTATACCCTACCTC						cg	F	T	C	II	1	6	24910252	Mus musculus	mm10	AAAaTCCTCAATTCCAaTATAACTTaaTTAATaaTTTATACCCTaCCTCr	AAGCTAACTATTTTCTCATTTAGAAGAATGTAATAGCATTCACCTATTCAAAGCTTGTTA[CG]AGGCAGGGTATAAACCATTAACCAAGTTATACTGGAATTGAGGACTTTGGGACTTATGCA	AAGCTAACTATTTTCTCATTTAGAAGAATGTAATAGCATTCACCTATTCAAAGCTTGTTA[CG]AGGCAGGGTATAAACCATTAACCAAGTTATACTGGAATTGAGGACTTTGGGACTTATGCA	GRCm10															FALSE	.	.	.	.	.	.	.
0.559678	-1.78754	6.91381	4.94243e-06	0.0020857	4.40077	cg37505779	53763181	TACAAACAATCATAACTAACCTTAACTTAACAAACAAACCRTACAACCCC						cg	F	T	C	II	1	1	135549033	Mus musculus	mm10	aCAaaCAaTCATaACTaaCCTTaaCTTaaCAAaCAaaCCrTACAaCCCCr	CAGCTCAGCAACCTGCAAAGCTTCTGGCCTTGGGAGGAACTTCCTAGAACGCCTGGCAGG[CG]GGGCTGTACGGCCTGCTTGCCAAGCCAAGGCCAGTCATGACTGCCTGCACAGAACATTCA	CAGCTCAGCAACCTGCAAAGCTTCTGGCCTTGGGAGGAACTTCCTAGAACGCCTGGCAGG[CG]GGGCTGTACGGCCTGCTTGCCAAGCCAAGGCCAGTCATGACTGCCTGCACAGAACATTCA	GRCm10															FALSE	Nav1	NM_173437.2	chr1	135434579	135585355	150777	-
0.482543	-0.56595	6.90507	5.01565e-06	0.00211327	4.38689	cg36869364	46653575	CCAAAAATATATTAAAAAACAACCTCTCCAAAACACATTAAAACAAAACC						cg	F	T	C	II	1	1	42756071	Mus musculus	mm10	CAAaAATaTaTTaaAAAACAaCCTCTCCAAaACACATTaaaACAaAaCCr	AAGTTTGTCAAACAACAGAATATCTGGTCTGTTGGCCAGAATTTGTTAATCTGTTACAAA[CG]GCTCTGTCCCAATGTGTCTTGGAGAGGCTGTTTTCCAACACATTCTTGGGTTCATCCTTG	AAGTTTGTCAAACAACAGAATATCTGGTCTGTTGGCCAGAATTTGTTAATCTGTTACAAA[CG]GCTCTGTCCCAATGTGTCTTGGAGAGGCTGTTTTCCAACACATTCTTGGGTTCATCCTTG	GRCm10															FALSE	.	.	.	.	.	.	.
0.575452	0.722064	6.90322	5.03131e-06	0.00211327	4.38394	cg36144911	75696583	ACTTATATCTTCTACCATTACTATAACTAAATACRTATCCRACTACTACC						cg	F	T	C	II	1	19	10268237	Mus musculus	mm10	CTTaTaTCTTCTaCCATTACTaTAACTaAaTaCrTaTCCraCTaCTaCCr	TAATATATACCAAGTGGTTAACACTGTGGGCAACGGCTGAGTTAATGGAGAGCCACTCAG[CG]GCAGCAGCCGGACACGCACTCAGTTACAGTAATGGCAGAAGACACAAGCTTTGTTCCGAG	TAATATATACCAAGTGGTTAACACTGTGGGCAACGGCTGAGTTAATGGAGAGCCACTCAG[CG]GCAGCAGCCGGACACGCACTCAGTTACAGTAATGGCAGAAGACACAAGCTTTGTTCCGAG	GRCm10															FALSE	Dagla	NM_198114.2	chr19	10245264	10304877	59614	-
0.582452	-0.767619	6.90252	5.03725e-06	0.00211327	4.38283	cg46012928	92685940	CTAAACTATCTACTACTTTAACAATACTTCTATTATAAACCAAAAAACCC						cg	F	T	C	II	1	8	93197797	Mus musculus	mm10	TaAaCTATCTaCTaCTTTAaCAATaCTTCTaTTaTaaACCAaaaaACCCr	TTTTTTTTTTTTTTAAGCTTAGATTACATAACTGAGCTGGTTGAGCAAGACTTAAGGAGG[CG]GGTCCCCTGGTCCACAACAGAAGCATTGCTAAAGCAGCAGATAGCTCAGAGACCCACAGA	TTTTTTTTTTTTTTAAGCTTAGATTACATAACTGAGCTGGTTGAGCAAGACTTAAGGAGG[CG]GGTCCCCTGGTCCACAACAGAAGCATTGCTAAAGCAGCAGATAGCTCAGAGACCCACAGA	GRCm10															FALSE	Ces1d	NM_053200.2	chr8	93166071	93197804	31734	-
-0.768221	0.666852	-6.90251	5.0373e-06	0.00211327	4.38282	cg30266711	79743565	CTCCCTCTAAAAAACRCCAACTTCCATATCAAACAACCATATAAAAAAAC						cg	F	T	C	II	1	11	118940723	Mus musculus	mm10	TCCCTCTaAaaaACrCCAACTTCCATaTCAaaCAaCCATATaaAaAaaCr	ATCTGCTTCCAAGCTCAGTCACTTGGTTGTTGGCAGGAGGCCTGGGTTCCTCGCCACATG[CG]CCTCTCCATATGGCTGCCTGACATGGAAGTTGGCGTCCCTCAGAGGGAGGGAGTGATCCG	ATCTGCTTCCAAGCTCAGTCACTTGGTTGTTGGCAGGAGGCCTGGGTTCCTCGCCACATG[CG]CCTCTCCATATGGCTGCCTGACATGGAAGTTGGCGTCCCTCAGAGGGAGGGAGTGATCCG	GRCm10															FALSE	.	.	.	.	.	.	.
0.870144	-2.88445	6.89784	5.07707e-06	0.00211867	4.37539	cg38181659	80602885	CTAACTTAACRCAAAAAAAACTCTACRCTTAAAAAAACTAACTTAACTCC						cg	F	T	C	II	1	2	27676264	Mus musculus	mm10	TaaCTTaaCrCAaaaaaAACTCTaCrCTTAaaaAaaCTaaCTTaaCTCCr	CCGCAACCCGCCCGCCGACTTGGGCAGCTGGAATTCGGATTTGGGTGTGAGCTACCTGAG[CG]GAGCCAAGCCAGCCTCCCTAAGCGCAGAGTTCCCCCTGCGCCAAGCCAGGCAACCGGCAG	CCGCAACCCGCCCGCCGACTTGGGCAGCTGGAATTCGGATTTGGGTGTGAGCTACCTGAG[CG]GAGCCAAGCCAGCCTCCCTAAGCGCAGAGTTCCCCCTGCGCCAAGCCAGGCAACCGGCAG	GRCm10		chr2:27676439-27677929													TRUE	Rxra	NM_011305.3	chr2	27675700	27677000	1301	+
0.66054	-0.0212814	6.89698	5.08443e-06	0.00211867	4.37402	cg31910357	48666403	TTATACCAAATATAAATCATACAATTTACACTCTATACCAAATTCTTACC						cg	R	B	C	II	1	13	93637955	Mus musculus	mm10	TaTaCCAaATaTAaaTCATaCAaTTTACACTCTaTaCCAAaTTCTTaCCr	AGTTATGTTACTTGTGCCAGATGTAGGTCATGCAGTTTACACTCTGTGCCAAGTTCTTGC[CG]GGCATCGCATCCTCATGCAATGATCTTGTATCTTCGCCTTTGTCAAATATTTGGTCACTG	AGTTATGTTACTTGTGCCAGATGTAGGTCATGCAGTTTACACTCTGTGCCAAGTTCTTGC[CG]GGCATCGCATCCTCATGCAATGATCTTGTATCTTCGCCTTTGTCAAATATTTGGTCACTG	GRCm10															FALSE	Bhmt	NM_016668.3	chr13	93637758	93637958	201	-
-1.03784	-4.19998	-6.89636	5.08974e-06	0.00211867	4.37304	cg38756370	53607821	AACRAACAACTATCTCTTTAAATATAATTTCCTTCTATTATATTTAAATC						cg	R	B	C	II	1	2	103970102	Mus musculus	mm10	aCraaCAaCTaTCTCTTTAAATaTaATTTCCTTCTATTaTATTTaAATCr	AGGGGGGAGGGGGCGGGCAGCTGTCTCTTTAAATGTGATTTCCTTCTATTGTATTTGAAT[CG]TGATCAGGAAAAAGGAAATGAAACCAGAGACAGAGGGAAGCTGAGCGAAAATAGACCTTC	AGGGGGGAGGGGGCGGGCAGCTGTCTCTTTAAATGTGATTTCCTTCTATTGTATTTGAAT[CG]TGATCAGGAAAAAGGAAATGAAACCAGAGACAGAGGGAAGCTGAGCGAAAATAGACCTTC	GRCm10		chr2:103970148-103970913													FALSE	Lmo2	NM_001142337.1	chr2	103957994	103981878	23885	+
-0.629102	2.89062	-6.89556	5.09658e-06	0.00211867	4.37177	cg45134973	49681425	ATAACACCCAATTTACATTACAAATATTCAATCTACTCTTCTACCTACCA	96801855	ATAACACCCAATTTACGTTACAAATATTCAATCTACTCTTCTACCTACCG	T	Red	R	cg	F	T	C	I	1	7	127596897	Mus musculus	mm10	aTaaCACCCAATTTaCrTTaCAAaTaTTCAATCTaCTCTTCTaCCTaCCr	GAAGAACGAGACCGAAGAGAAAGCAAGAAGATTGCGGATGAAGATGCCCTGCGGCGGATC[CG]GCAGGCAGAAGAGCAGATTGAACACTTGCAACGCAAATTGGGTGCCACCAAGCAGGTGAA	GAAGAACGAGACCGAAGAGAAAGCAAGAAGATTGCGGATGAAGATGCCCTGCGGCGGATC[CG]GCAGGCAGAAGAGCAGATTGAACACTTGCAACGCAAATTGGGTGCCACCAAGCAGGTGAA	GRCm10															FALSE	Rnf40	NM_172281.2	chr7	127588697	127603605	14909	+
0.48664	0.352398	6.89522	5.0995e-06	0.00211867	4.37123	cg39234159	52767554	TAACTTCAAATAAATACTTAACCCTCCAAAACATAAAACRAAAATACCAC						cg	F	T	C	II	1	2	163552072	Mus musculus	mm10	aaCTTCAaaTAAATaCTTAaCCCTCCAAaaCATAAAACrAaaATACCACr	GAGCCATTGCTCCATGGCAAGCCTGTACTATAATGTCGTCACCTGCCAATAACCTTCTGA[CG]TGGTATCCTCGTTTTATGCCTTGGAGGGCTAAGCATTTACCTGAAGCCAATGAATGCTGG	GAGCCATTGCTCCATGGCAAGCCTGTACTATAATGTCGTCACCTGCCAATAACCTTCTGA[CG]TGGTATCCTCGTTTTATGCCTTGGAGGGCTAAGCATTTACCTGAAGCCAATGAATGCTGG	GRCm10															FALSE	Hnf4a	NM_001312907.1	chr2	163506856	163572907	66052	+
-0.584943	1.89902	-6.89463	5.10454e-06	0.00211867	4.3703	cg36783913	51766977	ATAATCTTCCAACRTCTACCTAATAAAAATATTTTCCTACAACTAACTCC						cg	F	T	C	II	1	1	34178192	Mus musculus	mm10	TaATCTTCCAaCrTCTaCCTaaTaAAaaTaTTTTCCTaCAaCTaaCTCCr	CAGCTCACGGCGGAGGCGGAAGCTCGGCGAGCCGCGGTGGAGGAGAACCTCCGCAACTTC[CG]GAGCCAGCTGCAGGAAAACACCTTCACCAGGCAGACGCTGGAAGATCATCTGCGGAGGAA	CAGCTCACGGCGGAGGCGGAAGCTCGGCGAGCCGCGGTGGAGGAGAACCTCCGCAACTTC[CG]GAGCCAGCTGCAGGAAAACACCTTCACCAGGCAGACGCTGGAAGATCATCTGCGGAGGAA	GRCm10			chr1:34177942-34178193	chr1	34177942	34178193	251	25	161	19.9	64.1	1.04	chr1:34177942-34178193		FALSE	Dst	NM_001276764.1	chr1	33908224	34308662	400439	+
0.555036	-1.85898	6.89442	5.10635e-06	0.00211867	4.36996	cg39605506	8654120	ATATCTCAAAAATACCCTTTAAAACCAATCAATATAACTAAAAACCATTC						cg	R	B	C	II	1	3	31076042	Mus musculus	mm10	TaTCTCAaAaATaCCCTTTaaAaCCAATCAATaTaaCTaaAaaCCATTCr	GCCCTTTGCCTGTGTCTCAGAGATGCCCTTTGGAGCCAATCAATGTGGCTGGAGGCCATT[CG]TCCCGACTAAGAAGCCTGCTCACCACCAGGAGAAATTTCCTGTGCTGGCTGACAACCTTA	GCCCTTTGCCTGTGTCTCAGAGATGCCCTTTGGAGCCAATCAATGTGGCTGGAGGCCATT[CG]TCCCGACTAAGAAGCCTGCTCACCACCAGGAGAAATTTCCTGTGCTGGCTGACAACCTTA	GRCm10															FALSE	.	.	.	.	.	.	.
0.53639	-0.615275	6.89264	5.1217e-06	0.00211867	4.36713	cg37984274	79653442	TATTCATAAACAAACTCTCAAACATAAATTTAACCTAAATATCCAAAACC						cg	F	T	C	II	1	1	193241630	Mus musculus	mm10	ATTCATAAACAaaCTCTCAAACATaaaTTTaaCCTaaATaTCCAaAaCCr	CTGGCCTTGTCTCTATGATCTCTGCGTGTGGAGATTTTTAGAAATGATAGCAGGATGGCT[CG]GCTCTGGACATCCAGGCCAAACCCATGTTTGAGAGCCTGTTTATGAATAACCGCAAGTGC	CTGGCCTTGTCTCTATGATCTCTGCGTGTGGAGATTTTTAGAAATGATAGCAGGATGGCT[CG]GCTCTGGACATCCAGGCCAAACCCATGTTTGAGAGCCTGTTTATGAATAACCGCAAGTGC	GRCm10															FALSE	Hsd11b1	NM_001044751.1	chr1	193221639	193242360	20722	-
0.573334	0.725082	6.8918	5.12893e-06	0.00211867	4.36579	cg37772742	86614110	CTTACCTATATTACATAACTCCTATACAACCTAAATCCTAAATTCACAAC						cg	F	T	C	II	1	1	171143037	Mus musculus	mm10	TTACCTaTaTTaCATaaCTCCTaTaCAaCCTaaaTCCTaAaTTCACAaCr	TGTCGCAGACAGCATTCAGTGTTGTGTAGTGTGATGCTAACGTACAACACAAAATGTGCA[CG]CTGTGAACTCAGGACCCAGGCTGCACAGGAGCCATGCAACACAGGTAAGCAATACGGGAA	TGTCGCAGACAGCATTCAGTGTTGTGTAGTGTGATGCTAACGTACAACACAAAATGTGCA[CG]CTGTGAACTCAGGACCCAGGCTGCACAGGAGCCATGCAACACAGGTAAGCAATACGGGAA	GRCm10															FALSE	Sdhc	NM_025321.3	chr1	171129156	171150603	21448	-
0.584772	-1.56118	6.89176	5.12924e-06	0.00211867	4.36574	cg31606281	19740248	RACTCTACCRAATTCACCACATAAATTAAATCAAAAAACCATAAATCTTC						cg	R	B	C	II	1	13	53068031	Mus musculus	mm10	aCTCTaCCrAaTTCACCACATAaATTaaaTCAaaAaaCCATaAaTCTTCr	CCTCTGGGCTCGGCTCTGCCGAGTTCACCACATAGATTGGGTCAGGAGGCCATGAGTCTT[CG]GAACATTTGCTGAAGACTGGGCCATGACGGCCGGGCTTTGTCGAGCGTGCTCACACACCT	CCTCTGGGCTCGGCTCTGCCGAGTTCACCACATAGATTGGGTCAGGAGGCCATGAGTCTT[CG]GAACATTTGCTGAAGACTGGGCCATGACGGCCGGGCTTTGTCGAGCGTGCTCACACACCT	GRCm10															FALSE	.	.	.	.	.	.	.
0.498508	-1.15916	6.89149	5.13162e-06	0.00211867	4.3653	cg40926019	19616130	AAAACAACTACCTTAAACCCAAAATAAATATACTTATATATAATAACCTC						cg	F	T	C	II	1	4	57138137	Mus musculus	mm10	AaaCAACTaCCTTAAACCCAaaaTaaaTaTaCTTaTATATaaTaaCCTCr	CAGCCCAGCCTCCACTCCACTCTAGCAAAAACAGGCCAATACCCAGGTCAAAGACTGCCT[CG]AGGCCACCATATACAAGCACACCCACCCTGGGTTTAAGGCAGTTGCCTCTGCTTGTCGCC	CAGCCCAGCCTCCACTCCACTCTAGCAAAAACAGGCCAATACCCAGGTCAAAGACTGCCT[CG]AGGCCACCATATACAAGCACACCCACCCTGGGTTTAAGGCAGTTGCCTCTGCTTGTCGCC	GRCm10	chr4:57141905-57142146														FALSE	Epb41l4b	NM_019427.2	chr4	57061725	57143156	81432	-
0.425334	-0.977516	6.89059	5.13937e-06	0.00211881	4.36387	cg37993268	60737124	CTTCACTACCTATCTCCACAAAACTCCTAACAAAATACAACAATAACTAC						cg	F	T	C	II	1	1	195018042	Mus musculus	mm10	TTCACTACCTaTCTCCACAaAaCTCCTAACAAaATaCAACAaTaACTaCr	AGAAGTGGGGTGATGCTGGGAGGTTGTCACTGCGTAGTTGAGAAAAGTGGGGAATGATGA[CG]CAGTCACTGTTGCATCTTGTTAGGAGCTCTGTGGAGACAGGTAGTGAAGCTCCTGGGATC	AGAAGTGGGGTGATGCTGGGAGGTTGTCACTGCGTAGTTGAGAAAAGTGGGGAATGATGA[CG]CAGTCACTGTTGCATCTTGTTAGGAGCTCTGTGGAGACAGGTAGTGAAGCTCCTGGGATC	GRCm10															FALSE	A330023F24Rik	NR_015566.2	chr1	195017398	195037908	20511	+
0.67672	0.376267	6.8879	5.16274e-06	0.0021213	4.35959	cg36036956	40625820	AAAAATATAAATACTCTCTAATCCCCAAAACACAATTCACCAAAAATAAC						cg	R	B	C	II	1	18	84903309	Mus musculus	mm10	AAAaTaTaaaTACTCTCTaaTCCCCAAAaCACAaTTCACCAAAaaTAACr	ACGAGGCTGGTGAAAGTGTGGGTACTCTCTGGTCCCCAAAGCACAGTTCACCAAAGGTAA[CG]CCACAGAGGCAGACACTGAAAGCCCGTGCAAACACTCTGTAGCCAGCTTTCACAAGTTTG	ACGAGGCTGGTGAAAGTGTGGGTACTCTCTGGTCCCCAAAGCACAGTTCACCAAAGGTAA[CG]CCACAGAGGCAGACACTGAAAGCCCGTGCAAACACTCTGTAGCCAGCTTTCACAAGTTTG	GRCm10															FALSE	.	.	.	.	.	.	.
0.513203	-0.687587	6.88758	5.16556e-06	0.0021213	4.35907	cg45058830	7611941	CCACAACCATTAAAATACCATTAATATAACTATCACCAAAACCAACTTCC						cg	F	T	C	II	1	7	119525676	Mus musculus	mm10	CACAaCCATTaaaATaCCATTAaTaTAaCTATCACCAaAACCAaCTTCCr	TGCACTGTGCTGGAAACAATTACGGGGTGGGGTGGAGCACAAATTAACCTGTGGGAGCTT[CG]GAAGCTGGTTCTGGTGATAGCTACACTAATGGCATCCCAATGGCTGTGGATCAGGATGGT	TGCACTGTGCTGGAAACAATTACGGGGTGGGGTGGAGCACAAATTAACCTGTGGGAGCTT[CG]GAAGCTGGTTCTGGTGATAGCTACACTAATGGCATCCCAATGGCTGTGGATCAGGATGGT	GRCm10															FALSE	Acsm5	NM_178758.3	chr7	119524764	119526064	1301	+
0.448575	-0.338485	6.88734	5.16764e-06	0.0021213	4.35869	cg41923876	67612544	AAAACCTACRATAACCATCTTTCCACATCAACATTTTTAAATAATTATCC						cg	F	T	C	II	1	5	23416976	Mus musculus	mm10	AaaCCTACrATAaCCATCTTTCCACATCAaCATTTTTAAATaATTaTCCr	ACCAAAATGAAACAGGCGAGGAGAGTTGTGGCTCAGTACTACTCGCCTGGCAACGCTGCA[CG]GACAATCATTTAAAAATGCTGATGTGGAAAGATGGCTATCGTAGGCCTTGAAGTGATATT	ACCAAAATGAAACAGGCGAGGAGAGTTGTGGCTCAGTACTACTCGCCTGGCAACGCTGCA[CG]GACAATCATTTAAAAATGCTGATGTGGAAAGATGGCTATCGTAGGCCTTGAAGTGATATT	GRCm10		chr5:23418355-23418582													FALSE	.	.	.	.	.	.	.
0.572777	0.612411	6.88589	5.18029e-06	0.00212231	4.35638	cg45993713	26724193	TTATTCTCCAAAAACAACAAATACTCCTTATCTTTTAAAAAAACTATCCC						cg	F	T	C	II	1	8	91392516	Mus musculus	mm10	TaTTCTCCAAAAaCAACAAaTACTCCTTaTCTTTTaaaAAAaCTaTCCCr	AGCATTTCTAGGCTGAGGGTGCAGAGGAATCTAAAGGATAAACCACAGGCTTTACAGCTC[CG]GGACAGCTTTCCCAAAAGACAAGGAGTACTTGTTGCTTTTGGAGAACAACCTAGCTCAAG	AGCATTTCTAGGCTGAGGGTGCAGAGGAATCTAAAGGATAAACCACAGGCTTTACAGCTC[CG]GGACAGCTTTCCCAAAAGACAAGGAGTACTTGTTGCTTTTGGAGAACAACCTAGCTCAAG	GRCm10															FALSE	Fto	NM_011936.2	chr8	91313524	91668433	354910	+
0.696692	0.914107	6.88453	5.19217e-06	0.00212231	4.35422	cg37022022	15803525	AAAAACAAAAAATCCCTAAACCTCTAAAAATATCTATTCCTTATAAAAAC						cg	R	B	C	II	1	1	65176160	Mus musculus	mm10	aAaaCAAAaaaTCCCTaAACCTCTaAaAaTaTCTATTCCTTATAaaAACr	GCTTGTATTCAGGAGGCAAAGGGTCCCTGAACCTCTGAGAGTGTCTATTCCTTATAGGAA[CG]GTTGTGTAACCATTTCCTCTGTAATTGAAGCATTCTATCCTACACTAAGCTCTTTAAACA	GCTTGTATTCAGGAGGCAAAGGGTCCCTGAACCTCTGAGAGTGTCTATTCCTTATAGGAA[CG]GTTGTGTAACCATTTCCTCTGTAATTGAAGCATTCTATCCTACACTAAGCTCTTTAAACA	GRCm10	chr1:65178904-65179373														FALSE	Idh1	NM_010497.3	chr1	65158615	65179142	20528	-
0.673839	1.32122	6.88442	5.1931e-06	0.00212231	4.35405	cg33672949	89810588	TCTAATCAATTACATAACCTATACACATATAAAAAACTCCTAAACCTACA	52667159	TCTAATCAATTACATAACCTATACGCATATAAAAAACTCCTAAACCTACG	T	Red	R	cg	F	T	C	I	1	15	89334454	Mus musculus	mm10	TCTaaTCAaTTACATAACCTaTaCrCATATAAAaAaCTCCTaaaCCTACr	CATCGACCTTCATCCTGAGGGAGCAGTCACCCGACGGCAGAGCTTGCAGGAAAGCGAAAT[CG]TAGGCCCAGGAGCTCTTTATATGCGCACAGGTTATGTAACTGACCAGACAAAACCTATCT	CATCGACCTTCATCCTGAGGGAGCAGTCACCCGACGGCAGAGCTTGCAGGAAAGCGAAAT[CG]TAGGCCCAGGAGCTCTTTATATGCGCACAGGTTATGTAACTGACCAGACAAAACCTATCT	GRCm10															FALSE	Miox	NM_019977.2	chr15	89334272	89334472	201	+
[truncated: 3,875 more rows]
[truncated: 1 more columns]

## Sheet: DMR_0.01
chr	start	end	p	fdr	nprobe	gene	Average logFC
[truncated: 3,992 more rows]
